# Supplementary material for: Associations between serum soluble transferrin receptor and the prevalence of cancers
Source: Front Oncol. 2022 Dec 8;12:1039930. doi: 10.3389/fonc.2022.1039930 (PMC9773974; doi:10.3389/fonc.2022.1039930)
Supplement: Supplementary file 2 [file DataSheet_2.xlsx]

## Sheet: Data Sheet 1
SEQN	GENDR	AGE	RACE	WBO	EDUCATION	FMPIR1	IRONSI	TOTALPROTEINSI	SII	HSCRP	HEMOGLOBIN	SBP	DBP	BMI	SMOKING	Drinking	DM	HYPERTENSION	CVD	CANCER	Femalecancer	Breast	Cervix	Ovary	Uterus	Malecancer	Prostate	Testis	DR1TKCAL	DR1TPROT	DR1TTFAT	DR1TIRON	TC	HDL	FERSI	LBXGH	TFRSI	LNTFR	DR1TALCO	MCQ230A	MCQ230B	MCQ230C	MCQ240A	CURRENT_PAST_SMOKING
83742	1	32	1	2	2	1.03	9.1	74	374.345	3	13.1	118	71	28.2	0	0	0	0	0	0	0	0	0	0	0	0	0	0	2387	75.67	107.21	9.06	4.91	0.72	70.6	5.6	35.3	3.56388	0	NA	NA	NA	NA	0
83752	1	30	2	2	2	5	19.9	67	1005.21	0.9	14.3	104	50	26.6	1	0	0	0	0	0	0	0	0	0	0	0	0	0	3794	97.83	167.22	17.26	4.76	1.73	107	4.8	34.1	3.5293	0	NA	NA	NA	NA	2
83761	1	24	5	2	2	0	9.1	69	366.296	1.7	12.4	107	61	25.3	0	0	0	0	0	0	0	0	0	0	0	0	0	0	2055	71.83	94.82	9.03	6.28	1.06	35	5.7	26	3.2581	0	NA	NA	NA	NA	0
83762	1	27	4	1	2	2.12	12.5	64	727.667	7.6	10.8	140	77	38	1	0	0	0	0	0	0	0	0	0	0	0	0	0	2096	71.62	97.47	11.4	4.24	0.88	125	5	47	3.85015	0	NA	NA	NA	NA	1
83799	1	37	2	2	2	4.18	4.5	72	595	0.08	11.2	111	75	25.5	0	0	0	0	0	0	0	0	0	0	0	0	0	0	1911	70.81	74.58	11.89	6	2.33	4.76	5	84.7	4.43912	0	NA	NA	NA	NA	0
83809	1	20	4	1	1	3.3	15.8	71	271.304	0.08	12.3	99	61	26.2	0	0	0	0	0	0	0	0	0	0	0	0	0	0	1445	79.96	95.92	4.5	3.7	2.04	38	5.7	40.9	3.71113	0	NA	NA	NA	NA	0
83822	1	20	4	1	2	1.62	6.8	79	432	1.1	11.9	115	63	22.2	0	0	0	0	0	0	0	0	0	0	0	0	0	0	833	46.96	21.3	6.71	5.33	2.04	14	5.4	66.1	4.19117	0	NA	NA	NA	NA	0
83823	1	29	1	2	0	0.35	10.4	71	247.519	4.8	13.1	108	70	29.7	0	0	0	0	0	0	0	0	0	0	0	0	0	0	1911	70.81	74.58	11.89	6.57	0.96	21.4	5.7	47.9	3.86912	0	NA	NA	NA	NA	0
83828	1	39	1	2	1	0.49	10.6	68	531.2	0.6	13.6	102	62	27.2	0	0	0	0	0	0	0	0	0	0	0	0	0	0	2068	69.69	87.27	7.94	4.89	1.42	21.4	5.6	37.9	3.63495	0	NA	NA	NA	NA	0
83837	1	45	1	2	0	2.18	12.2	72	428.792	8	13.8	113	68	35.2	0	0	1	0	0	0	0	0	0	0	0	0	0	0	1316	74.31	60.04	8.62	4.99	1.34	51.4	10.7	42.5	3.7495	0	NA	NA	NA	NA	0
83845	1	44	4	1	0	1.5	12	78	278.375	2.1	14.9	117	77	45.3	1	0	1	1	0	0	0	0	0	0	0	0	0	0	2631	190.47	83.54	20.17	3.59	0.7	439	7	27.8	3.32504	0	NA	NA	NA	NA	1
83851	1	37	3	0	1	1.86	8.2	74	731.088	2.8	14.1	123	76	35.3	1	0	0	0	0	0	0	0	0	0	0	0	0	0	2079	81.29	86.2	14.8	5.09	1.01	40.3	5.2	18.1	2.89591	0	NA	NA	NA	NA	1
83853	1	49	3	0	1	5	18.1	71	466.133	0.9	15.1	117	85	27.4	0	1	0	1	0	0	0	0	0	0	0	0	0	0	1936	78.89	103.6	10.05	6.28	1.58	90.4	5.1	39.2	3.66868	37.2	NA	NA	NA	NA	0
83854	1	46	1	2	2	2.39	10.9	72	316	8.3	13.4	123	66	41.6	0	0	0	0	0	0	0	0	0	0	0	0	0	0	3127	102.26	175.33	14.64	4.78	1.24	131	5.7	31.2	3.44042	0	NA	NA	NA	NA	0
83857	1	31	3	0	2	5	22.7	74	692.308	0.9	14.2	114	52	27.8	0	1	0	1	0	0	0	0	0	0	0	0	0	0	2781	140.74	136.05	18.52	6.47	1.58	125	4.8	23.7	3.16548	63	NA	NA	NA	NA	0
83865	1	21	3	0	0	2.14	32.8	72	372.778	0.5	13.5	93	61	16.3	1	0	0	0	0	0	0	0	0	0	0	0	0	0	1802	40.02	56.26	6.16	4.4	1.6	30.4	5	28.8	3.36038	0	NA	NA	NA	NA	1
83871	1	30	1	2	0	0.87	23.6	71	326.696	1.3	13.2	99	61	27.4	0	0	0	0	0	0	0	0	0	0	0	0	0	0	2077	93.84	86.53	25.17	4.32	1.84	24	5	26.8	3.2884	0	NA	NA	NA	NA	0
83875	1	42	4	1	2	1.82	3.8	66	355.263	1.6	8.8	102	71	34.4	0	0	0	0	0	0	0	0	0	0	0	0	0	0	2328	117.1	88.81	12.82	3.03	1.71	8.32	5.8	143	4.96284	0	NA	NA	NA	NA	0
83881	1	32	3	0	2	2.06	13.1	72	421.474	0.7	13.1	111	77	23.9	0	1	0	0	0	0	0	0	0	0	0	0	0	0	1630	109.77	58.59	15.21	5.12	1.86	71.3	5.1	40	3.68888	6	NA	NA	NA	NA	0
83897	1	29	3	0	2	1.68	12.2	73	331.375	1.4	13.1	113	73	30.7	1	1	0	0	0	0	0	0	0	0	0	0	0	0	2025	62.29	95.96	12.97	4.55	1.6	63.9	5	32.8	3.49043	42.7	NA	NA	NA	NA	2
83903	1	47	4	1	2	2.08	4.7	67	528.75	15.9	11.7	156	87	42.5	1	0	0	1	0	0	0	0	0	0	0	0	0	0	2392	57.4	94.5	9.96	3.67	1.16	23.1	5.3	64.1	4.16044	0	NA	NA	NA	NA	2
83911	1	43	4	1	2	3.3	2	77	640	5.4	8.4	127	74	30.7	0	0	1	0	0	0	0	0	0	0	0	0	0	0	1664	57.1	72.87	11.1	3.85	1.63	5.62	9.9	264	5.57595	0	NA	NA	NA	NA	0
83924	1	48	3	0	0	2.5	6.4	71	1235.52	36.9	13.7	143	81	35.6	1	0	0	1	0	0	0	0	0	0	0	0	0	0	1556	41.19	50.86	10.24	6.18	1.11	91.7	6.8	48.9	3.88978	0	NA	NA	NA	NA	2
83933	1	31	3	0	0	1.32	15.2	77	929.571	3.3	13.5	106	64	33.5	1	0	0	0	0	0	0	0	0	0	0	0	0	0	1229	74.95	51.73	8.56	5.38	1.16	53.6	5.2	44.7	3.79997	0	NA	NA	NA	NA	2
83934	1	27	4	1	1	0.86	22.2	74	603.75	0.08	13.5	101	73	17.2	0	0	0	0	0	0	0	0	0	0	0	0	0	0	1911	70.81	74.58	11.89	3.31	1.78	44	5.1	41.2	3.71844	0	NA	NA	NA	NA	0
83935	1	44	5	2	2	1.86	18.8	72	575	0.3	12.9	101	71	23.4	0	0	0	0	0	0	0	0	0	0	0	0	0	0	1911	70.81	74.58	11.89	5.53	1.71	68.2	5.3	28.8	3.36038	0	NA	NA	NA	NA	0
83953	1	46	1	2	2	5	6.4	70	420.632	1.1	12.4	118	69	28.7	0	0	0	0	0	0	0	0	0	0	0	0	0	0	1861	56.9	82.76	10.45	5.82	2.2	63.6	5.3	42	3.73767	0	NA	NA	NA	NA	0
83958	1	47	4	1	1	0.25	1.3	71	353.577	1.4	6.9	149	79	22.7	1	0	0	1	0	0	0	0	0	0	0	0	0	0	3070	132.71	104.56	11.19	3.52	1.16	3.09	5.8	404	6.00141	0	NA	NA	NA	NA	1
83959	1	22	3	0	2	0.8	9.1	65	546	5.8	12.9	122	72	47.6	0	0	1	0	1	0	0	0	0	0	0	0	0	0	1472	59.76	59.48	7.95	5.12	1.06	36.5	5.1	62	4.12713	0	NA	NA	NA	NA	0
83961	1	44	3	0	2	3.7	7.3	67	494.609	2.5	12	129	83	30.6	0	1	0	0	0	0	0	0	0	0	0	0	0	0	2138	75.09	73.25	13.06	4.97	1.14	31.8	5.3	57.5	4.05178	37.4	NA	NA	NA	NA	0
83962	1	28	4	1	2	1.65	17.7	72	337.333	0.08	12.4	109	62	24.7	0	0	0	0	0	0	0	0	0	0	0	0	0	0	1787	71.52	88.8	5.96	4.14	1.5	22.8	5.3	31.4	3.44681	0	NA	NA	NA	NA	0
83963	1	44	4	1	2	1.51	8.1	74	368.421	42.6	11.6	138	93	52.1	0	0	0	1	0	0	0	0	0	0	0	0	0	0	2930	78.95	121.86	53.13	4.65	1.47	140	5.8	43.2	3.76584	0	NA	NA	NA	NA	0
83969	1	21	3	0	2	2.01	8.6	74	722.125	8.5	14	119	65	35.2	0	0	0	0	0	0	0	0	0	0	0	0	0	0	1595	90.65	41.14	10.65	4.19	1.22	48.9	5	46	3.82864	0	NA	NA	NA	NA	0
83971	1	26	3	0	2	2.27	13.6	65	1044.48	12.9	13.6	117	47	38.9	1	0	1	0	0	0	0	0	0	0	0	0	0	0	1398	73.23	50.01	7.93	4.91	1.53	29.2	5.1	28.2	3.33932	0	NA	NA	NA	NA	1
83989	1	37	4	1	0	0.16	14.3	71	336.773	0.2	13.3	115	63	28.5	1	1	0	1	0	0	0	0	0	0	0	0	0	0	1357	62.48	85.37	6.31	4.27	2.17	39.5	5.3	30.8	3.42751	1.9	NA	NA	NA	NA	1
83993	1	41	4	1	1	2.1	9	76	402.667	3.1	13.1	105	46	49.8	0	1	0	0	0	0	0	0	0	0	0	0	0	0	2096	95.38	57.82	9.75	6.59	1.34	55.3	6.3	48.5	3.88156	17.4	NA	NA	NA	NA	0
84006	1	45	4	1	0	0.87	5.4	68	466.667	2.8	10.4	118	49	33.3	1	0	1	1	1	0	0	0	0	0	0	0	0	0	1443	42.23	48.49	6.97	7.16	0.98	11.4	6.7	91.3	4.51415	0	NA	NA	NA	NA	1
84016	1	41	1	2	2	5	11.5	71	405.909	1.4	12.4	101	64	24.1	0	0	0	0	0	0	0	0	0	0	0	0	0	0	2802	118.94	130.99	21.1	5.09	1.86	36.7	6.3	34.1	3.5293	0	NA	NA	NA	NA	0
84021	1	29	5	2	2	1.47	19.2	72	410	1.7	14.3	116	72	30.9	0	0	0	1	0	0	0	0	0	0	0	0	0	0	2493	107.8	90.7	13.08	4.4	1.55	53.2	5	34.2	3.53223	0	NA	NA	NA	NA	0
84033	1	41	5	2	2	3.11	12	63	857.812	4	12.2	109	63	33.6	1	0	0	0	0	0	0	0	0	0	0	0	0	0	1995	67.55	85.91	7.3	3.72	1.16	9.4	5.5	39.5	3.6763	0	NA	NA	NA	NA	2
84034	1	25	4	1	2	1.55	9.1	75	94.2857	0.2	13.9	94	60	19.6	1	1	0	0	0	0	0	0	0	0	0	0	0	0	2334	65.82	99.42	9.58	4.4	1.89	16.1	5.5	39.6	3.67883	13.8	NA	NA	NA	NA	1
84038	1	23	3	0	2	2.36	6.6	68	236	6.7	14.5	107	79	31.9	0	1	0	0	0	0	0	0	0	0	0	0	0	0	1709	56.04	60.28	19.08	4.5	1.55	29.9	5.4	46.3	3.83514	46.8	NA	NA	NA	NA	0
84046	1	45	3	0	2	5	5.4	70	763.727	12.8	13.3	129	91	33.2	0	0	0	1	0	0	0	0	0	0	0	0	0	0	2207	81.18	84.18	20.31	7.5	1.53	25.5	5.9	60.1	4.09601	0	NA	NA	NA	NA	0
84058	1	21	3	0	2	2.2	9.1	68	625.5	0.08	12.2	117	63	23.1	0	0	0	0	0	0	0	0	0	0	0	0	0	0	1911	70.81	74.58	11.89	4.5	1.94	11.2	5.1	56.4	4.03247	0	NA	NA	NA	NA	0
84062	1	45	1	2	2	0.31	6.1	79	505.75	5.6	12.4	139	71	33.9	0	0	0	0	0	0	0	0	0	0	0	0	0	0	3449	98.03	177.37	18.74	5.2	1.11	14.1	6.8	80	4.38203	0	NA	NA	NA	NA	0
84065	1	48	3	0	2	2.12	9.3	67	438.828	0.2	13.8	107	73	25.9	0	0	0	0	0	1	NA	NA	NA	NA	NA	NA	NA	NA	1615	51.95	71.58	8.8	4.6	1.19	29.4	5.2	35	3.55535	0	35	NA	NA	NA	0
84073	1	39	2	2	1	1.42	8.6	69	608.583	12.1	12	116	77	31.9	1	0	0	0	0	0	0	0	0	0	0	0	0	0	2851	84.87	121.51	16.94	3.8	1.03	131	5.8	41.5	3.72569	0	NA	NA	NA	NA	2
84077	1	46	2	2	1	4.78	11.3	72	482	0.6	12.7	126	71	30.8	0	0	0	0	0	0	0	0	0	0	0	0	0	0	2271	82.5	93.91	11.47	6.44	0.98	27.3	5.7	60.8	4.10759	0	NA	NA	NA	NA	0
84128	1	46	1	2	2	0.59	3	71	1044	5.4	8	125	73	29.4	1	0	0	1	0	0	0	0	0	0	0	0	0	0	1481	90.69	20.02	21.42	3.75	1.58	3.46	5.9	139	4.93447	0	NA	NA	NA	NA	2
84130	1	26	3	0	1	4.49	44.1	67	479.238	4.2	14.1	127	71	20.5	1	1	0	0	0	0	0	0	0	0	0	0	0	0	1470	60.38	69.19	11.9	5.87	2.51	30.8	5.3	37.2	3.61631	7.7	NA	NA	NA	NA	1
84137	1	28	5	2	2	2.1	12	79	295.368	1.3	12.1	103	54	19.5	0	0	0	0	0	0	0	0	0	0	0	0	0	0	1716	70.89	47.4	12.85	5.9	2.04	16.4	5.1	46.8	3.84588	0	NA	NA	NA	NA	0
84140	1	21	4	1	2	0.29	10.7	79	196.435	0.2	12.1	121	70	23.5	0	0	0	0	0	0	0	0	0	0	0	0	0	0	1445	50.64	62.74	9.79	5.51	2.4	11.4	5.3	53.1	3.97218	0	NA	NA	NA	NA	0
84143	1	35	5	2	0	0.32	10.9	75	780.071	2.4	12.8	119	65	28.9	1	1	0	0	0	0	0	0	0	0	0	0	0	0	1786	98.56	81.53	10.89	4.16	1.32	82	5.4	28	3.3322	0.1	NA	NA	NA	NA	1
84156	1	29	4	1	2	0.35	9.9	76	397.263	17.4	12.3	115	57	33.4	0	0	0	1	0	0	0	0	0	0	0	0	0	0	2111	141.55	79.67	13.7	4.27	1.37	33.5	5.9	39.1	3.66612	0	NA	NA	NA	NA	0
84171	1	30	3	0	2	5	10.2	67	241.333	1.5	14.2	94	67	33.1	0	0	0	0	0	0	0	0	0	0	0	0	0	0	2258	109.97	66.61	20.24	4.99	0.96	63.5	5.3	33	3.49651	0	NA	NA	NA	NA	0
84187	1	25	3	0	1	3.33	17.2	65	802.16	0.7	13.1	109	52	21.6	0	0	0	0	0	0	0	0	0	0	0	0	0	0	1467	66.23	34.4	12.34	3.8	1.19	23.3	4.9	34.8	3.54962	0	NA	NA	NA	NA	0
84192	1	27	2	2	2	1.58	17.4	70	532.5	3.4	12.7	115	77	38.1	0	1	0	0	0	0	0	0	0	0	0	0	0	0	1562	61.27	67.66	11.68	4.42	1.42	114	5.1	40.9	3.71113	12.3	NA	NA	NA	NA	0
84229	1	43	4	1	0	0.75	10.7	71	323	1.1	12.8	115	58	32.5	0	0	0	0	0	0	0	0	0	0	0	0	0	0	2574	81.15	91.05	10.76	6.8	1.84	60.5	6	49.4	3.89995	0	NA	NA	NA	NA	0
84230	1	28	2	2	2	2.3	3	71	1037.21	14	11.5	126	63	57.8	0	0	0	0	0	0	0	0	0	0	0	0	0	0	1911	70.81	74.58	11.89	4.16	1.45	7.67	5.5	89.4	4.49312	0	NA	NA	NA	NA	0
84235	1	47	4	1	2	1.44	5.4	68	270	3.6	12	123	52	35.9	0	0	0	0	1	0	0	0	0	0	0	0	0	0	1023	27.95	55.17	3.29	5.28	0.85	565	5	52	3.95124	0	NA	NA	NA	NA	0
84238	1	25	4	1	1	1.07	11.6	72	155.833	2.1	14.2	107	50	29.7	0	0	0	0	0	0	0	0	0	0	0	0	0	0	1473	68.31	65.74	8.02	4.4	1.63	158	5	51.9	3.94932	0	NA	NA	NA	NA	0
84242	1	42	5	2	2	3.87	6.4	72	561	0.6	12.3	113	73	22	0	0	0	0	0	0	0	0	0	0	0	0	0	0	1506	66.79	34.43	10.6	4.84	1.5	8.64	5.5	91.2	4.51305	0	NA	NA	NA	NA	0
84245	1	43	3	0	1	2.51	18.1	71	676.667	2.3	12.8	109	69	28.9	0	0	0	0	0	0	0	0	0	0	0	0	0	0	1794	81.98	105.83	12.78	4.24	1.68	42.5	5.1	28.1	3.33577	0	NA	NA	NA	NA	0
84248	1	29	4	1	2	0.35	13.4	75	481.765	0.5	12.6	118	65	26.7	1	0	0	0	0	0	0	0	0	0	0	0	0	0	2037	49.17	71.12	8.81	3.9	1.81	22	5.5	55.5	4.01638	0	NA	NA	NA	NA	1
84285	1	44	5	2	2	0.54	17	65	1003.3	9.4	14.5	119	78	32.6	1	0	1	1	0	0	0	0	0	0	0	0	0	0	2166	99.26	78.4	12.15	5.77	1.06	88.6	6	36.9	3.60821	0	NA	NA	NA	NA	1
84298	1	36	5	2	2	5	11.1	70	487.385	1.3	13.2	122	72	24	0	0	1	1	0	0	0	0	0	0	0	0	0	0	1911	70.81	74.58	11.89	4.55	1.71	13.5	5.1	50.6	3.92395	0	NA	NA	NA	NA	0
84305	1	36	1	2	1	0.36	12	72	448.68	1.7	13.8	125	82	32.2	1	0	0	0	0	0	0	0	0	0	0	0	0	0	2015	72.12	98.13	15.11	5.48	1.45	52.6	5	39.2	3.66868	0	NA	NA	NA	NA	2
84308	1	41	3	0	2	5	15.8	68	639.571	0.9	13.1	103	64	20.6	0	0	0	0	0	1	NA	NA	NA	NA	NA	NA	NA	NA	1839	84.13	96.36	8.81	4.19	2.15	23.4	5.7	36.2	3.58906	0	32	NA	NA	NA	0
84316	1	45	3	0	2	3.27	18.1	73	517.222	12.1	15.2	111	69	35.6	0	0	0	0	0	0	0	0	0	0	0	0	0	0	1741	56.54	83.65	7.92	4.03	1.24	177	5.3	30.7	3.42426	0	NA	NA	NA	NA	0
84323	1	21	4	1	2	3.52	17.4	76	425.143	1.5	13.6	101	63	26.5	0	0	0	0	0	0	0	0	0	0	0	0	0	0	1758	39.98	101.27	6.89	4.29	1.5	51.6	5.3	30.3	3.41115	0	NA	NA	NA	NA	0
84347	1	28	3	0	2	2.78	15	72	297.6	0.3	13.3	103	63	27.8	0	0	0	0	0	0	0	0	0	0	0	0	0	0	1911	86.44	77.7	13.48	4.86	1.27	27.7	5	45.5	3.81771	0	NA	NA	NA	NA	0
84349	1	39	3	0	2	2.24	10	64	275.769	1.9	14.2	115	73	34.1	1	1	0	0	0	0	0	0	0	0	0	0	0	0	2312	72.43	117.17	15.53	4.11	1.47	82.2	5.3	29	3.3673	14.4	NA	NA	NA	NA	1
84363	1	36	1	2	0	2.64	13.4	70	585.278	1.3	14	105	63	29.9	0	0	0	0	0	0	0	0	0	0	0	0	0	0	2055	75.28	64.25	12.38	4.47	1.19	57	5.5	27.8	3.32504	0	NA	NA	NA	NA	0
84378	1	45	4	1	1	1.1	4.8	82	378.605	43.3	11.7	108	75	48.8	0	0	0	1	0	0	0	0	0	0	0	0	0	0	2416	99.17	89.72	20.33	4.63	1.5	133	5.4	59.9	4.09268	0	NA	NA	NA	NA	0
84383	1	32	5	2	2	5	17.6	73	454.571	2.8	13.3	112	55	28.8	1	0	0	1	0	0	0	0	0	0	0	0	0	0	1040	76.16	22.99	9.12	4.34	1.32	184	5	19	2.94444	0	NA	NA	NA	NA	1
84394	1	45	2	2	0	1.23	23.6	71	403.2	2.4	13.5	126	79	32.4	0	0	0	0	0	0	0	0	0	0	0	0	0	0	962	49.3	31.2	6.49	4.94	1.81	115	5.7	33.5	3.51155	0	NA	NA	NA	NA	0
84395	1	25	3	0	2	1.24	9	74	1100	5.4	14.3	108	69	38.7	0	0	0	0	0	0	0	0	0	0	0	0	0	0	1050	36.66	41.52	12.78	3.8	1.68	36.9	5.2	34.6	3.54385	0	NA	NA	NA	NA	0
84396	1	38	1	2	1	1.65	8.4	68	921	52.9	12.6	115	63	59.4	1	0	1	0	0	0	0	0	0	0	0	0	0	0	936	48	28.62	14.28	4.19	1.22	114	7.6	65.6	4.18358	0	NA	NA	NA	NA	1
84402	1	27	2	2	2	0.08	21	73	427.042	1	13.6	109	79	19.6	0	0	0	0	0	0	0	0	0	0	0	0	0	0	1840	33.46	54.1	7.08	6.1	1.42	13.5	5.3	22.8	3.12676	0	NA	NA	NA	NA	0
84409	1	47	3	0	1	1.03	18.3	75	675.714	7.9	15.2	113	57	19.1	1	0	0	0	0	0	0	0	0	0	0	0	0	0	742	37.2	23.9	3.4	6	1.89	60.9	5.6	43.7	3.77735	0	NA	NA	NA	NA	1
84410	1	28	2	2	0	0.59	14.5	72	777.92	14.7	12.9	86	58	28.4	0	0	0	0	0	0	0	0	0	0	0	0	0	0	763	11.21	5.68	4.68	3.41	0.83	218	5.3	33.5	3.51155	0	NA	NA	NA	NA	0
84412	1	25	1	2	2	0.97	6.4	69	384.894	1.1	13.4	115	60	24.3	1	0	0	0	0	0	0	0	0	0	0	0	0	0	1888	90.82	95.17	8.93	3.78	1.76	23.7	5.2	35.4	3.56671	0	NA	NA	NA	NA	1
84419	1	35	1	2	2	2.06	3.9	72	1016.84	23.6	11.8	119	78	45.8	0	0	0	0	0	0	0	0	0	0	0	0	0	0	3072	125.18	138.15	25.38	4.34	1.32	33	5.5	56.8	4.03954	0	NA	NA	NA	NA	0
84440	1	30	5	2	0	1.7	10.9	77	339.167	0.4	12.6	126	73	23.4	0	1	0	0	0	0	0	0	0	0	0	0	0	0	1721	50.01	32.72	10.6	4.99	2.15	88.2	4.9	31.7	3.45632	56	NA	NA	NA	NA	0
84444	1	36	2	2	2	3.99	10	67	453.25	1.8	11.8	99	73	23.5	0	0	0	0	0	0	0	0	0	0	0	0	0	0	1911	70.81	74.58	11.89	5.07	1.45	16.5	5.5	39.1	3.66612	0	NA	NA	NA	NA	0
84448	1	26	5	2	2	5	29.6	70	357.955	0.08	12.8	103	69	20.5	0	1	0	0	0	0	0	0	0	0	0	0	0	0	1341	45.96	44.24	7.34	3.36	1.27	30.2	4.7	24.3	3.19048	15.5	NA	NA	NA	NA	0
84456	1	42	5	2	1	1.76	13.1	70	484.421	1.3	14.4	92	59	20.2	0	0	0	0	0	0	0	0	0	0	0	0	0	0	1911	70.81	74.58	11.89	4.19	1.78	94	4.9	37.3	3.61899	0	NA	NA	NA	NA	0
84459	1	31	5	2	2	3.22	10.6	77	381.857	12.9	13.5	105	69	24.6	0	0	0	0	0	0	0	0	0	0	0	0	0	0	1251	97.37	25.98	9.07	4.76	1.81	142	5.2	42.5	3.7495	0	NA	NA	NA	NA	0
84462	1	35	1	2	1	0.18	17.7	77	262.667	1.1	13.9	116	76	25.3	0	0	0	0	0	0	0	0	0	0	0	0	0	0	1911	70.81	74.58	11.89	4.53	1.24	120	5.7	42.8	3.75654	0	NA	NA	NA	NA	0
84473	1	22	3	0	2	2.27	16.5	69	627.5	1.4	13.8	89	61	27.9	1	0	0	0	0	0	0	0	0	0	0	0	0	0	912	45.75	48.78	5.4	4.16	1.14	37.6	4.9	31	3.43399	0	NA	NA	NA	NA	2
84485	1	24	4	1	1	0.65	7.5	77	638.37	19.9	13.4	119	71	36.6	0	0	0	0	0	0	0	0	0	0	0	0	0	0	402	12.84	15.88	1.57	5.09	1.16	30.6	5.7	71.3	4.2669	0	NA	NA	NA	NA	0
84487	1	24	3	0	2	2.2	16.5	71	329.684	0.5	13.7	122	72	19.2	0	0	0	0	0	0	0	0	0	0	0	0	0	0	1911	70.81	74.58	11.89	5.22	2.66	23.3	4.9	39.6	3.67883	0	NA	NA	NA	NA	0
84490	1	28	1	2	2	4.57	9.1	74	566.154	3.8	14.6	127	66	32.9	1	0	0	0	0	0	0	0	0	0	0	0	0	0	1184	16	36.25	4.36	4.84	1.14	43.5	5.1	41.4	3.72328	0	NA	NA	NA	NA	1
84493	1	44	4	1	1	0.68	7.3	67	274.286	16.9	12.2	120	59	56.7	0	0	1	1	1	0	0	0	0	0	0	0	0	0	2963	110.99	138.04	20.44	4.53	1.73	19.4	13.3	67.6	4.21361	0	NA	NA	NA	NA	0
84494	1	22	2	2	1	1.24	13.4	74	630	1.5	13.3	121	76	21.8	0	0	0	0	0	0	0	0	0	0	0	0	0	0	1387	97.97	39.32	12.15	4.24	1.09	21.5	4.4	49.1	3.89386	0	NA	NA	NA	NA	0
84532	1	23	1	2	0	1.49	2.5	78	638.889	0.3	8.8	115	65	26	0	0	0	0	0	0	0	0	0	0	0	0	0	0	3320	142.8	109.37	52.18	3.72	1.55	3.57	5.3	243	5.49306	0	NA	NA	NA	NA	0
84535	1	21	3	0	1	2.89	9.7	71	299.724	1.7	13.4	122	80	30.4	0	0	0	0	0	0	0	0	0	0	0	0	0	0	3796	128.56	131.13	19.96	3.31	1.19	9.18	4.7	58.8	4.07414	0	NA	NA	NA	NA	0
84547	1	37	2	2	2	1.09	8.8	71	486.345	7.7	12.2	133	72	46.1	0	0	0	0	0	0	0	0	0	0	0	0	0	0	1468	28.93	38.44	9.89	4.84	1.99	37.2	5.6	53.3	3.97594	0	NA	NA	NA	NA	0
84565	1	25	5	2	2	3.2	11.8	75	388	1.1	13.8	93	65	17.9	0	0	0	0	0	0	0	0	0	0	0	0	0	0	1988	94.36	98.35	12.65	3.88	1.89	93.3	5.5	20.4	3.01553	0	NA	NA	NA	NA	0
84579	1	27	5	2	2	5	14.3	71	333.767	14	13.3	111	65	30.3	1	0	1	0	0	0	0	0	0	0	0	0	0	0	1852	52.48	45.62	10.2	5.09	0.91	194	5.3	31.9	3.46261	0	NA	NA	NA	NA	2
84587	1	22	1	2	2	0.77	9	73	1111.6	9	12.2	139	65	39.7	0	0	0	0	0	0	0	0	0	0	0	0	0	0	2370	70.11	95.92	8.5	3.05	1.11	30.4	5.6	30.1	3.40453	0	NA	NA	NA	NA	0
84617	1	42	3	0	2	3.14	8.1	76	465	3.1	13.8	102	53	30.3	0	0	0	0	0	0	0	0	0	0	0	0	0	0	1227	78.25	70.2	7.8	3.52	1.45	57.2	5	35.5	3.56953	0	NA	NA	NA	NA	0
84618	1	23	1	2	2	2.85	16.7	68	241.241	0.5	15	115	65	33.3	0	0	0	0	0	0	0	0	0	0	0	0	0	0	3915	144.11	205.59	13.34	4.86	1.45	33.5	4.9	46.3	3.83514	0	NA	NA	NA	NA	0
84619	1	41	5	2	0	1.67	17.9	67	336.316	2	14	127	72	26.8	0	0	0	0	0	0	0	0	0	0	0	0	0	0	1911	70.81	74.58	11.89	5.35	0.96	151	5.4	27.1	3.29953	0	NA	NA	NA	NA	0
84620	1	21	5	2	2	1.55	19.3	72	380.091	6.8	12.9	97	73	25	1	0	0	0	0	0	0	0	0	0	0	0	0	0	1330	64.93	42.43	13.02	4.81	1.27	59.9	5.3	42.1	3.74005	0	NA	NA	NA	NA	1
84625	1	40	5	2	2	4.63	14.5	68	372.059	0.08	13.6	122	72	20.2	0	0	0	0	0	0	0	0	0	0	0	0	0	0	1911	70.81	74.58	11.89	6.1	2.35	68.2	5.4	26.8	3.2884	0	NA	NA	NA	NA	0
84628	1	32	1	2	2	1.74	15.6	69	837.364	3.6	15.6	108	75	29	0	0	0	0	0	0	0	0	0	0	0	0	0	0	1367	55.1	39.12	10.6	6.15	1.19	238	4.7	35.5	3.56953	0	NA	NA	NA	NA	0
84639	1	30	2	2	0	0.51	7	71	724.941	10.9	13.1	115	69	43.2	1	0	0	1	0	0	0	0	0	0	0	0	0	0	1911	70.81	74.58	11.89	5.2	1.14	38.7	5.5	33.2	3.50255	0	NA	NA	NA	NA	2
84641	1	28	4	1	0	0.15	4.5	74	334.286	2.3	10.7	137	75	33.9	0	1	1	1	1	0	0	0	0	0	0	0	0	0	2382	59.29	103.25	10.35	4.34	0.98	10.8	6.1	92	4.52179	18.2	NA	NA	NA	NA	0
84650	1	30	4	1	2	5	14.3	71	281.333	2.01	14.8	112	62	26	1	0	0	0	0	0	0	0	0	0	0	0	0	0	1181	67.6	42.96	10.5	4.32	1.06	37.8	5	21.8	3.08191	0	NA	NA	NA	NA	1
84658	1	22	4	1	2	1.65	8.1	71	538.071	1.2	13.1	107	68	16.7	0	0	0	0	0	0	0	0	0	0	0	0	0	0	3097	116.73	139.11	21.91	4.16	1.99	17.4	5.2	49.4	3.89995	0	NA	NA	NA	NA	0
84659	1	47	4	1	2	0.52	13.8	74	368.75	4.5	12.8	127	85	48.2	0	0	1	1	0	0	0	0	0	0	0	0	0	0	1523	58.67	72.4	5.76	5.51	1.4	51.9	6.2	35.9	3.58074	0	NA	NA	NA	NA	0
84671	1	25	3	0	2	2.81	10.9	65	423.077	0.6	12.5	108	68	25.7	0	1	0	0	0	0	0	0	0	0	0	0	0	0	1993	55.64	68.7	9.18	5.02	2.12	47.9	4.9	43.1	3.76352	28.4	NA	NA	NA	NA	0
84672	1	39	4	1	1	1.53	7	75	388.762	7.2	13.2	135	83	35	0	0	0	1	0	0	0	0	0	0	0	0	0	0	1213	56.04	49.91	9.07	4.53	1.78	23.5	5.6	66	4.18965	0	NA	NA	NA	NA	0
84677	1	43	4	1	2	2.79	8.4	65	311.25	4.3	11.3	137	51	30.7	1	0	0	1	1	0	0	0	0	0	0	0	0	0	1145	40.71	38.77	6.34	4.45	1.34	46	5.4	78.1	4.35799	0	NA	NA	NA	NA	2
84685	1	27	3	0	1	1.76	10.6	73	605.667	2.8	13.5	99	60	25.4	0	1	1	0	0	0	0	0	0	0	0	0	0	0	2469	82.08	75.85	14.77	4.22	1.66	40	4.9	26.4	3.27336	42.1	NA	NA	NA	NA	0
84689	1	47	5	2	2	5	5.9	72	850	19.2	11.2	126	85	28.2	0	0	0	0	0	0	0	0	0	0	0	0	0	0	1623	74.85	58.25	7.29	4.14	1.5	53.3	6.1	53.7	3.98341	0	NA	NA	NA	NA	0
84700	1	48	4	1	1	0.95	10.9	77	286.759	2.4	11.7	141	55	34.8	0	0	0	1	0	0	0	0	0	0	0	0	0	0	2178	76.44	85.58	13.95	5.38	1.19	52.2	7.8	54.9	4.00551	0	NA	NA	NA	NA	0
84716	1	44	3	0	0	1.07	9.3	71	686.889	13.7	13.4	144	85	42.1	1	0	0	0	1	0	0	0	0	0	0	0	0	0	2135	66.37	114.21	10.6	5.46	1.01	119	5.5	45	3.80666	0	NA	NA	NA	NA	2
84734	1	36	3	0	1	0.44	12.7	69	1020	21.5	14	120	79	44.2	1	1	0	1	0	0	0	0	0	0	0	0	0	0	2664	65.62	57.91	7.37	3.75	0.67	72.5	6.8	31.4	3.44681	119	NA	NA	NA	NA	1
84745	1	42	1	2	0	2.11	17.9	74	355.556	0.08	14.6	126	73	23.4	0	0	0	0	0	0	0	0	0	0	0	0	0	0	1163	64.65	35.65	8.1	3.88	1.76	24.4	5.3	49.3	3.89792	0	NA	NA	NA	NA	0
84759	1	34	1	2	2	0.89	15	76	363.19	3.6	12.7	113	76	28.5	0	0	0	0	0	0	0	0	0	0	0	0	0	0	1941	82.03	54.11	11.18	3.1	0.88	19.3	5.7	39.1	3.66612	0	NA	NA	NA	NA	0
84765	1	44	2	2	0	0.75	14.1	80	480.769	13.3	13.7	164	107	43.3	1	1	1	1	0	0	0	0	0	0	0	0	0	0	2323	36.72	29.98	8.24	6.8	1.03	432	10.9	34.6	3.54385	159.7	NA	NA	NA	NA	1
84766	1	40	4	1	2	5	3.4	63	730.1	4.8	9.6	116	55	36.7	0	0	0	0	0	0	0	0	0	0	0	0	0	0	1675	28.09	26.98	6.3	3.34	0.75	13.1	5.1	93.6	4.53903	0	NA	NA	NA	NA	0
84768	1	33	1	2	1	2.46	8.4	75	368.128	1.5	12.1	120	77	37.2	0	0	0	0	0	0	0	0	0	0	0	0	0	0	2083	72.45	75.96	18.22	4.53	1.4	10.4	5.3	49.9	3.91002	0	NA	NA	NA	NA	0
84778	1	20	4	1	2	1.88	27.2	69	318.815	0.3	13.7	119	70	21.7	1	0	0	0	0	0	0	0	0	0	0	0	0	0	857	20.26	32.09	2.15	3.85	2.17	29.7	5	36.2	3.58906	0	NA	NA	NA	NA	1
84783	1	47	2	2	0	0.75	12.2	73	732.353	2	13.9	111	67	29.6	0	0	0	0	0	0	0	0	0	0	0	0	0	0	1336	38.38	36.33	7.76	4.24	1.11	45	5.6	40.4	3.69883	0	NA	NA	NA	NA	0
84795	1	38	3	0	2	5	15.8	72	469.895	2	14	104	71	30.3	0	0	0	0	0	0	0	0	0	0	0	0	0	0	1850	134.25	69.22	13.16	5.74	1.53	81.4	5.4	23.4	3.15274	0	NA	NA	NA	NA	0
84797	1	25	3	0	2	5	15.9	70	392.95	0.6	12.5	117	79	22	1	1	0	0	0	0	0	0	0	0	0	0	0	0	4055	150.43	152.95	26.86	4.01	1.97	35	5.4	27.1	3.29953	11.9	NA	NA	NA	NA	2
84816	1	28	3	0	2	3.5	24.5	79	993.6	6.6	15.6	112	76	18.4	1	0	0	0	0	0	0	0	0	0	0	0	0	0	1884	119.09	63.45	14.89	4.01	1.45	49.4	5	51.6	3.94352	0	NA	NA	NA	NA	2
84818	1	33	3	0	2	1.76	22	77	593.92	0.2	15	119	73	22.6	1	0	0	0	0	0	0	0	0	0	0	0	0	0	3341	88.59	125.95	28.2	4.06	1.34	81.4	5.3	30.9	3.43076	0	NA	NA	NA	NA	1
84825	1	41	4	1	2	1.41	5.2	72	507.294	10.9	10	158	93	56.4	0	0	0	1	0	0	0	0	0	0	0	0	0	0	2078	71.51	75.98	22.71	4.09	1.16	9.14	5.7	107	4.67283	0	NA	NA	NA	NA	0
84826	1	45	5	2	1	0.95	10.9	75	849.231	0.9	13.6	97	57	20.9	0	0	0	0	0	0	0	0	0	0	0	0	0	0	1640	88.91	57.97	15.79	8.53	1.81	72.8	5.8	51	3.93183	0	NA	NA	NA	NA	0
84833	1	32	4	1	2	3.13	7.2	73	513.5	11.7	12.8	109	71	21.1	0	0	0	0	0	0	0	0	0	0	0	0	0	0	2398	126.62	79.35	14.84	4.11	1.5	126	4.6	58.3	4.0656	0	NA	NA	NA	NA	0
84837	1	45	1	2	0	1.65	2.1	68	385.704	4.7	9.3	109	61	29.8	0	0	0	0	0	0	0	0	0	0	0	0	0	0	1566	57.63	63.2	9.56	5.09	1.37	4.76	5.9	87.1	4.46706	0	NA	NA	NA	NA	0
84841	1	27	4	1	1	0.2	13.6	67	1072.44	1.3	9.1	136	94	23.2	1	0	0	1	0	0	0	0	0	0	0	0	0	0	1576	62.04	37.82	4.92	8.82	2.09	1720	3.8	104	4.64439	0	NA	NA	NA	NA	2
84847	1	28	1	2	1	2.47	30.1	72	599.667	0.9	15.2	111	73	24.2	0	0	0	0	0	0	0	0	0	0	0	0	0	0	1911	70.81	74.58	11.89	4.27	1.47	26.2	4.8	50.7	3.92593	0	NA	NA	NA	NA	0
84852	1	28	3	0	2	1.57	21.1	74	540.444	10.4	13.8	123	59	26.1	0	0	0	0	0	0	0	0	0	0	0	0	0	0	2196	126.19	131.53	12.95	3.85	1.11	84.4	5.3	17.8	2.8792	0	NA	NA	NA	NA	0
84859	1	42	4	1	2	1.94	15	72	246.667	1	11.4	107	61	37.2	0	0	0	1	1	0	0	0	0	0	0	0	0	0	1664	51.14	64.18	11.18	3.47	1.16	179	4.8	55.2	4.01096	0	NA	NA	NA	NA	0
84879	1	35	1	2	0	0.82	5.9	70	678.14	2.9	13	120	52	40.1	1	0	0	0	0	0	0	0	0	0	0	0	0	0	3379	91.54	137.73	12.39	5.07	1.34	8.86	5.9	51	3.93183	0	NA	NA	NA	NA	1
84880	1	44	4	1	2	2.46	13.6	68	376	0.6	12.3	101	62	33.4	0	1	0	0	0	0	0	0	0	0	0	0	0	0	2170	70.53	90.77	10.86	5.02	1.58	29.2	5.7	29.4	3.38099	14	NA	NA	NA	NA	0
84899	1	32	3	0	2	1.86	4.3	67	774.4	0.7	13	111	77	23.1	1	0	0	0	0	0	0	0	0	0	0	0	0	0	2018	75.47	90.19	8.7	4.84	2.33	10.9	5.1	40.4	3.69883	0	NA	NA	NA	NA	1
84904	1	48	5	2	2	2.55	17	75	664	24.7	13.8	96	58	33.1	0	0	1	1	1	0	0	0	0	0	0	0	0	0	935	43.34	34.91	12.89	6.62	1.27	61.1	7.6	48.7	3.88568	0	NA	NA	NA	NA	0
84913	1	47	1	2	0	2.24	10.6	71	537.778	12.4	12.6	110	77	37.3	0	0	1	0	0	0	0	0	0	0	0	0	0	0	2986	143.29	92.4	25.77	3.96	1.45	29.8	6.9	29.9	3.39786	0	NA	NA	NA	NA	0
84915	1	45	1	2	2	3.45	21.9	68	900	7.9	14.2	127	77	35.4	0	0	1	1	0	1	1	NA	NA	NA	1	NA	NA	NA	954	76.1	42.03	5.92	4.22	0.72	2300	7.5	17.1	2.83908	0	37	38	NA	NA	0
84927	1	43	3	0	2	2.47	9.9	72	844.773	2.3	13	124	75	43	0	0	0	1	0	0	0	0	0	0	0	0	0	0	1835	91.21	85.97	11.57	3.75	1.03	39.9	5.7	33	3.49651	0	NA	NA	NA	NA	0
84937	1	26	4	1	0	0.42	2.3	79	829.95	0.6	9.5	115	61	24.5	1	0	0	0	0	0	0	0	0	0	0	0	0	0	2275	117.01	108.69	12.44	4.55	1.32	6.37	5.4	159	5.0689	0	NA	NA	NA	NA	1
84945	1	30	4	1	2	5	5.7	78	1301.47	6.8	12.9	113	61	28.7	1	0	0	0	0	0	0	0	0	0	0	0	0	0	1765	81.27	62.35	8.95	3.59	2.38	93.6	5.2	34.5	3.54096	0	NA	NA	NA	NA	1
84946	1	38	2	2	0	0.34	12	70	565.781	0.7	13.5	100	55	25.3	0	0	0	0	1	0	0	0	0	0	0	0	0	0	306	40.23	6.64	0.94	3.98	1.22	15.7	5.4	55.7	4.01998	0	NA	NA	NA	NA	0
84948	1	41	4	1	2	4.83	10	74	588.882	17.2	14	113	71	39	0	0	0	1	0	0	0	0	0	0	0	0	0	0	1123	34.07	23.59	10.93	4.22	1.63	41.1	5.7	47.2	3.85439	0	NA	NA	NA	NA	0
84956	1	43	3	0	2	5	4.7	67	707.967	0.08	10.4	115	65	21.9	1	1	0	0	0	0	0	0	0	0	0	0	0	0	873	13.64	55.94	3.01	5.46	2.72	13.4	4.8	83.1	4.42004	17	NA	NA	NA	NA	1
84964	1	22	1	2	1	1.99	9.9	71	456.591	0.5	13.2	116	71	22.7	0	1	0	0	0	0	0	0	0	0	0	0	0	0	2563	77.69	93.21	14.87	3.7	1.58	10.8	5	33.6	3.51453	18.7	NA	NA	NA	NA	0
84974	1	28	3	0	2	3.82	34.4	71	717.5	2.9	13	113	56	26.1	0	1	0	0	0	0	0	0	0	0	0	0	0	0	1120	58.66	51.63	3.61	3.85	1.5	24.1	5.5	32.3	3.47507	18.7	NA	NA	NA	NA	0
84985	1	26	2	2	1	5	32.2	71	691.333	2.1	13.9	124	87	31.4	0	0	0	0	0	0	0	0	0	0	0	0	0	0	1911	70.81	74.58	11.89	4.16	1.09	24.7	5.5	40.8	3.70868	0	NA	NA	NA	NA	0
84989	1	37	5	2	1	3.74	19.3	63	558.333	2	13.3	108	67	34.1	1	0	0	0	0	0	0	0	0	0	0	0	0	0	3116	146.12	149.19	19.85	4.97	1.32	60.4	5.6	23	3.13549	0	NA	NA	NA	NA	1
84997	1	29	5	2	2	5	28.7	74	455.897	6.4	13.6	99	72	23.2	0	0	0	0	0	0	0	0	0	0	0	0	0	0	4552	80.97	212.93	30.74	5.33	1.63	71.3	5.5	32.5	3.48124	0	NA	NA	NA	NA	0
85010	1	20	5	2	2	3.84	11.3	71	383.909	0.4	14.2	112	75	30.6	1	0	0	0	0	0	0	0	0	0	0	0	0	0	1566	35.34	46.96	5.83	5.02	1.32	12.2	5.4	50.3	3.91801	0	NA	NA	NA	NA	1
85019	1	36	4	1	0	0.77	12.4	83	457.143	10.6	13.5	117	85	41.3	1	0	0	0	0	0	0	0	0	0	0	0	0	0	1886	35.15	59.76	9.67	4.81	1.27	77.3	5.4	34.2	3.53223	0	NA	NA	NA	NA	1
85040	1	25	1	2	0	1.65	12	70	321.545	0.3	14.4	101	60	20.6	0	0	0	0	0	0	0	0	0	0	0	0	0	0	972	41.57	27.29	2.97	3.47	1.58	66.4	4.9	17.6	2.8679	0	NA	NA	NA	NA	0
85055	1	39	3	0	2	5	14.3	69	540	0.5	14.2	106	75	20.4	1	0	0	0	0	1	1	NA	1	NA	NA	NA	NA	NA	1627	59.54	70.53	11.98	3.31	1.27	125	4.8	25.5	3.23868	0	15	NA	NA	NA	2
85063	1	26	4	1	1	3.67	3.9	72	795.652	0.8	9	101	74	21.8	0	0	0	0	0	0	0	0	0	0	0	0	0	0	364	8.7	6.08	2.06	3.13	0.93	2.63	5.3	158	5.0626	0	NA	NA	NA	NA	0
85073	1	41	1	2	0	0.59	9.3	66	794.4	5.3	12.3	104	71	32.6	0	0	0	0	0	0	0	0	0	0	0	0	0	0	1747	64.95	52.66	20.34	4.22	0.91	11	5.6	42.6	3.75185	0	NA	NA	NA	NA	0
85074	1	23	5	2	2	3.74	10.7	72	334.8	0.5	15.3	113	68	20.8	1	1	0	0	0	0	0	0	0	0	0	0	0	0	1338	39.77	29.03	4.44	3.65	1.89	64.7	5.2	29.7	3.39115	37.4	NA	NA	NA	NA	1
85075	1	41	2	2	1	0.62	3	74	1282.4	11.9	11.3	133	65	39	0	0	0	0	0	0	0	0	0	0	0	0	0	0	1911	70.81	74.58	11.89	5.56	1.34	13.6	6.4	47.8	3.86703	0	NA	NA	NA	NA	0
85095	1	22	2	2	1	2.87	7.2	78	516.414	3.1	13.6	112	64	23.5	0	0	0	0	0	0	0	0	0	0	0	0	0	0	1653	67.05	45.78	10.05	3.52	0.93	79.5	5.1	34.3	3.53515	0	NA	NA	NA	NA	0
85104	1	29	1	2	0	2.11	9	61	366.667	2.8	11.8	110	77	25.3	0	0	0	0	0	0	0	0	0	0	0	0	0	0	1625	90.33	69.99	10.62	4.97	1.16	36.5	5.3	35.5	3.56953	0	NA	NA	NA	NA	0
85111	1	49	2	2	2	3.33	8.6	75	742.5	18.2	13.4	134	78	31.2	0	1	0	1	0	0	0	0	0	0	0	0	0	0	2762	61.57	166.23	11.86	6.47	1.5	146	6.7	28.3	3.34286	1.1	NA	NA	NA	NA	0
85114	1	22	2	2	2	2.24	11.8	73	558	2.7	13.8	103	71	23.8	1	1	0	0	0	0	0	0	0	0	0	0	0	0	1723	50.45	64.98	11.5	3.15	1.34	63	5	23.1	3.13983	14	NA	NA	NA	NA	1
85118	1	45	3	0	2	3.56	11.1	72	504	7.1	13.9	131	70	48.4	1	0	0	0	0	1	NA	NA	NA	NA	NA	NA	NA	NA	347	9.87	17.28	1.22	4.99	1.03	109	5.4	29.6	3.38777	0	24	NA	NA	NA	2
85126	1	39	3	0	2	5	14	82	1878.95	7.2	14.1	120	80	35.1	0	0	0	1	0	1	1	NA	1	NA	NA	NA	NA	NA	707	28.6	33.49	4.97	5.02	1.24	96.4	5.4	36.9	3.60821	0	15	NA	NA	NA	0
85131	1	24	3	0	2	4.21	19.3	74	373.409	2.5	13.7	145	90	21.9	1	1	0	0	0	0	0	0	0	0	0	0	0	0	1426	48.65	64.6	8	4.99	2.22	23.6	4.9	28.6	3.35341	18.5	NA	NA	NA	NA	2
85132	1	31	2	2	2	5	16.7	72	492.75	0.3	12.2	103	62	25.4	0	0	0	0	0	0	0	0	0	0	0	0	0	0	1253	109.99	39.21	13.6	3.65	1.84	18	5.1	35	3.55535	0	NA	NA	NA	NA	0
85138	1	31	3	0	2	0.78	8.8	68	495.6	6.2	13.9	108	71	33.2	0	1	0	0	0	1	NA	NA	NA	NA	NA	NA	NA	NA	1570	56.14	65.51	14.85	4.81	1.11	74.2	5.2	26.9	3.29213	10.5	21	NA	NA	NA	0
85147	1	25	1	2	0	0.25	16.1	72	831.364	1	14.4	106	65	27.5	0	0	0	0	0	0	0	0	0	0	0	0	0	0	1101	31.37	53.47	13.61	5.04	1.03	18.9	5	37.4	3.62167	0	NA	NA	NA	NA	0
85158	1	44	5	2	2	2.6	12.4	74	926.438	2.3	11.7	121	77	27.5	0	0	0	1	0	0	0	0	0	0	0	0	0	0	2224	81.2	106.56	14.08	4.89	2.33	80.6	6.1	43.8	3.77963	0	NA	NA	NA	NA	0
85159	1	31	4	1	1	2.23	7.2	81	455.714	3.2	10.4	123	79	23.3	0	1	0	0	0	0	0	0	0	0	0	0	0	0	2129	81.81	79.06	10.81	5.48	1.71	11.3	5.3	98.9	4.59411	9.9	NA	NA	NA	NA	0
85160	1	26	3	0	2	0.34	13.1	65	275.9	0.7	13.1	111	78	22.7	1	0	0	0	0	0	0	0	0	0	0	0	0	0	1478	60.93	70.86	8.17	3.34	1.45	89	4.2	35.5	3.56953	0	NA	NA	NA	NA	1
85171	1	29	2	2	2	2.64	18.1	78	480	1.4	13.6	104	51	30.1	0	0	0	0	0	1	NA	NA	NA	NA	NA	NA	NA	NA	1911	70.81	74.58	11.89	4.06	1.06	38.7	5	28	3.3322	0	19	NA	NA	NA	0
85173	1	45	2	2	0	0.34	8.8	68	206.926	4.5	12.5	104	56	29.4	0	0	0	0	0	0	0	0	0	0	0	0	0	0	917	38.8	25.84	3.61	6.34	1.22	13.2	5.6	42	3.73767	0	NA	NA	NA	NA	0
85190	1	29	1	2	1	1.31	14.3	71	695.172	2.01	12.3	122	72	30.3	0	0	0	0	0	0	0	0	0	0	0	0	0	0	1911	70.81	74.58	11.89	5.84	0.96	15.8	6	41.2	3.71844	0	NA	NA	NA	NA	0
85193	1	36	5	2	2	5	14.1	74	433.5	0.3	12.7	115	69	21.5	0	0	0	0	0	0	0	0	0	0	0	0	0	0	3173	119.26	152.57	15.95	4.45	1.81	18.7	5.6	27.7	3.32143	0	NA	NA	NA	NA	0
85194	1	38	2	2	1	2.59	10.2	79	388.235	1	13.4	115	62	23.5	0	0	0	0	0	0	0	0	0	0	0	0	0	0	2619	125.2	106.42	16.47	4.27	1.29	19.3	5.1	37.8	3.63231	0	NA	NA	NA	NA	0
85200	1	46	1	2	2	4.44	3.8	69	833	6.7	10.3	133	75	51.5	0	1	0	0	0	0	0	0	0	0	0	0	0	0	3289	70.88	121.72	7.89	4.14	1.55	5.4	5.6	54.3	3.99452	55.6	NA	NA	NA	NA	0
85204	1	20	2	2	1	0.5	12.5	68	249.148	0.3	13.7	104	69	23.3	0	0	0	0	0	0	0	0	0	0	0	0	0	0	1911	70.81	74.58	11.89	4.11	1.58	11.9	4.6	34.6	3.54385	0	NA	NA	NA	NA	0
85209	1	43	3	0	2	2.74	13.8	68	419.412	2.8	13.7	103	72	25.6	0	1	0	0	0	0	0	0	0	0	0	0	0	0	727	25.47	40.53	1.21	5.22	1.66	77	5.3	24.9	3.21487	23.8	NA	NA	NA	NA	0
85222	1	35	3	0	2	1.9	14.3	77	366.4	0.3	14.1	111	72	24.7	0	0	0	0	0	0	0	0	0	0	0	0	0	0	2517	44.39	119.92	7.14	4.03	1.06	116	5.1	35.4	3.56671	0	NA	NA	NA	NA	0
85224	1	48	1	2	2	4.71	13.8	75	421.095	4.3	13.5	98	61	38.8	0	0	1	0	0	0	0	0	0	0	0	0	0	0	1201	61.74	51.16	6.05	4.55	1.34	93.4	8.7	24.7	3.2068	0	NA	NA	NA	NA	0
85229	1	29	3	0	2	5	4.8	68	734.429	12.2	14.5	127	75	41.8	0	0	0	0	0	0	0	0	0	0	0	0	0	0	2510	110.95	105.61	15.6	4.47	1.22	64.1	5.2	34.9	3.55249	0	NA	NA	NA	NA	0
85231	1	40	2	2	0	0.92	17.2	75	636	1.9	13.6	122	72	23.7	0	0	0	0	0	0	0	0	0	0	0	0	0	0	1906	68.27	72.7	10.06	3.98	1.22	108	5.7	20.9	3.03975	0	NA	NA	NA	NA	0
85243	1	43	2	2	2	2.67	5	70	781.97	6	10.4	122	76	40	0	0	0	0	0	0	0	0	0	0	0	0	0	0	1961	66.05	91.05	11.41	5.77	0.91	10.4	6.2	55.8	4.02177	0	NA	NA	NA	NA	0
85244	1	43	2	2	0	1.49	9.1	75	342.222	16.2	14.4	143	84	31.2	1	0	0	0	0	0	0	0	0	0	0	0	0	0	1411	31.91	60.65	3.8	5.33	0.96	44	5.5	57	4.04305	0	NA	NA	NA	NA	1
85252	1	22	4	1	2	0.94	20.6	69	421.235	0.9	13.8	95	51	33.9	1	0	0	0	0	0	0	0	0	0	0	0	0	0	3272	129.84	172.03	16.49	4.06	1.63	24.3	5.1	38.7	3.65584	0	NA	NA	NA	NA	2
85264	1	26	3	0	2	3.54	13.3	73	147.5	7.9	14.9	122	72	21.1	0	0	0	0	0	0	0	0	0	0	0	0	0	0	1911	70.81	74.58	11.89	4.89	1.89	44.2	5.1	26.2	3.26576	0	NA	NA	NA	NA	0
85284	1	20	3	0	2	5	16.1	70	377.217	8.4	13.4	127	51	25.1	0	0	0	0	0	0	0	0	0	0	0	0	0	0	1896	51.5	93.28	11.03	4.81	2.28	17	5.3	44.4	3.79324	0	NA	NA	NA	NA	0
85293	1	29	5	2	2	5	7.9	75	533.97	14.1	13	119	71	35.2	1	1	0	0	0	0	0	0	0	0	0	0	0	0	2441	90.19	111.66	11.15	4.81	0.41	78	5.5	42.2	3.74242	37.4	NA	NA	NA	NA	1
85302	1	46	3	0	1	2.89	14.3	68	338.406	0.4	12.9	117	75	29	1	0	0	0	0	0	0	0	0	0	0	0	0	0	2093	48.95	98.73	8.59	4.78	1.37	11.6	5.5	36.9	3.60821	0	NA	NA	NA	NA	2
85319	1	42	2	2	1	1.49	5.9	75	498.083	0.6	12.5	130	67	32.9	0	0	0	0	0	1	1	NA	NA	1	NA	NA	NA	NA	2881	137.24	116.89	21.43	4.45	1.09	8.42	5.8	71.4	4.2683	0	28	NA	NA	NA	0
85337	1	43	4	1	2	5	3.4	76	373.71	1.2	10.6	133	74	39.2	0	0	0	0	0	0	0	0	0	0	0	0	0	0	1581	39.16	46.98	9.76	5.38	2.25	10.5	5.4	116	4.75359	0	NA	NA	NA	NA	0
85341	1	37	4	1	2	0.94	3.4	72	248.786	0.7	11.8	119	69	35.6	1	1	1	1	0	0	0	0	0	0	0	0	0	0	1736	61.15	56.43	18.23	2.79	0.75	9.83	6	100	4.60517	21.6	NA	NA	NA	NA	2
85343	1	21	1	2	1	0.83	2	73	250.909	0.9	10.3	124	53	31.8	0	0	0	0	0	0	0	0	0	0	0	0	0	0	650	35.94	40.87	2.39	3.8	1.34	3.46	5.7	137	4.91998	0	NA	NA	NA	NA	0
85352	1	38	1	2	1	1	7.3	72	789	9.9	12.4	133	81	44.6	0	0	0	1	0	0	0	0	0	0	0	0	0	0	2781	121.89	80.49	16.71	5.82	0.59	65.4	5.5	41.4	3.72328	0	NA	NA	NA	NA	0
85354	1	45	4	1	1	3.71	13.4	67	204.188	0.2	12.4	123	88	40.2	1	1	0	0	1	0	0	0	0	0	0	0	0	0	1337	37.53	57.87	4.48	5.51	1.68	72.4	6	36.6	3.60005	14	NA	NA	NA	NA	2
85361	1	43	1	2	0	1.38	8.4	75	612.258	0.4	11.9	136	85	24.5	1	1	0	0	0	0	0	0	0	0	0	0	0	0	2635	87.93	118.95	15.89	4.34	1.84	9.83	5.5	47.6	3.86283	36.9	NA	NA	NA	NA	1
85362	1	20	3	0	2	1.79	16.1	74	273.211	1.4	14	105	59	20.8	1	0	0	0	0	0	0	0	0	0	0	0	0	0	1911	70.81	74.58	11.89	4.58	1.09	90.2	5.4	29.7	3.39115	0	NA	NA	NA	NA	2
85367	1	49	4	1	2	4.39	21.5	70	278.833	0.8	12.1	127	89	27.8	0	1	0	0	0	0	0	0	0	0	0	0	0	0	1933	89.84	70.2	9.52	4.6	2.07	163	5.5	22.7	3.12236	44.3	NA	NA	NA	NA	0
85390	1	23	1	2	1	2.88	29.6	68	558.519	0.5	14.3	124	71	29.7	1	1	0	0	0	0	0	0	0	0	0	0	0	0	3061	90.9	69.73	12.65	4.37	1.97	45	5.2	21.2	3.054	125	NA	NA	NA	NA	2
85399	1	35	3	0	2	0.92	5.6	64	770.111	3.9	13	122	84	38.2	1	0	0	0	0	0	0	0	0	0	0	0	0	0	1031	32.96	61.02	3.26	5.02	1.29	16.8	5.5	37.2	3.61631	0	NA	NA	NA	NA	1
85401	1	46	1	2	2	0.92	3.8	71	479.348	7.4	11.4	125	72	52.8	1	1	0	1	0	0	0	0	0	0	0	0	0	0	3443	91.39	118.08	17.7	3.83	1.37	7.02	5.1	88.6	4.48413	38.2	NA	NA	NA	NA	1
85407	1	31	5	2	2	3.24	15.9	75	273.077	4	13.3	102	53	19.4	0	0	0	0	0	0	0	0	0	0	0	0	0	0	1626	47.09	72.17	11.38	4.6	2.12	43.3	5.4	25.7	3.24649	0	NA	NA	NA	NA	0
85408	1	30	5	2	2	2.5	12.9	64	358.759	1.2	12.6	98	64	32.9	1	0	0	0	0	0	0	0	0	0	0	0	0	0	667	61.35	11.81	3.25	3.34	1.53	32.3	4.8	49	3.89182	0	NA	NA	NA	NA	2
85412	1	26	5	2	2	0.34	11.3	73	1087.44	2.5	13.1	101	61	19.6	0	0	0	0	0	0	0	0	0	0	0	0	0	0	1911	70.81	74.58	11.89	5.04	1.5	50.3	5.3	25.7	3.24649	0	NA	NA	NA	NA	0
85420	1	21	5	2	2	2.55	9.3	81	384.828	6	14	122	65	32.8	0	0	1	1	0	0	0	0	0	0	0	0	0	0	1221	88.45	37.03	13.22	6.26	0.88	183	6.4	55.6	4.01818	0	NA	NA	NA	NA	0
85431	1	47	1	2	0	1.49	15.8	69	390.739	7.6	14	120	65	41.2	0	0	0	0	0	0	0	0	0	0	0	0	0	0	1830	137.96	59.41	12.35	6.03	1.19	235	6.3	19.8	2.98568	0	NA	NA	NA	NA	0
85437	1	34	4	1	2	0.55	16.1	67	488.125	0.4	13.1	107	63	27	0	0	0	0	0	0	0	0	0	0	0	0	0	0	1505	79.63	72.79	13.36	3.85	1.66	32.1	5.3	24	3.17805	0	NA	NA	NA	NA	0
85438	1	45	3	0	2	5	14.9	69	425.526	0.8	12.4	114	66	28.6	0	1	0	0	0	0	0	0	0	0	0	0	0	0	2282	87.76	101.65	11.31	4.65	1.24	71.9	5.1	30.7	3.42426	46.8	NA	NA	NA	NA	0
85443	1	48	3	0	1	4.68	10.2	72	905.391	0.9	14.6	121	58	27.1	1	1	0	0	0	0	0	0	0	0	0	0	0	0	1677	29.15	77.52	6.57	5.25	1.19	60	5.3	30	3.4012	18.6	NA	NA	NA	NA	1
85453	1	42	2	2	0	1.05	5.9	62	940.5	4.1	10.8	121	82	24.6	1	0	1	1	1	0	0	0	0	0	0	0	0	0	1084	25.55	25.24	3.96	4.71	1.09	13.6	5.2	132	4.8828	0	NA	NA	NA	NA	1
85463	1	48	5	2	0	1.59	16.7	73	411.871	1.3	15.5	149	78	24.6	0	0	0	0	0	0	0	0	0	0	0	0	0	0	1911	70.81	74.58	11.89	5.38	1.86	74	10.7	44.5	3.79549	0	NA	NA	NA	NA	0
85468	1	46	5	2	2	3.57	12	71	431.207	2.1	11.3	112	71	25.1	1	0	0	0	0	0	0	0	0	0	0	0	0	0	1911	70.81	74.58	11.89	5.38	1.66	511	5.2	57.7	4.05526	0	NA	NA	NA	NA	1
85477	1	44	1	2	2	2.09	3.6	63	660	1.6	10.3	152	98	30.8	0	0	0	1	0	0	0	0	0	0	0	0	0	0	1823	86.46	48.98	19.1	6	1.14	5.73	6	108	4.68213	0	NA	NA	NA	NA	0
85483	1	32	3	0	2	1.29	15.8	72	290.182	11.9	12.8	103	65	30.7	0	0	0	0	0	0	0	0	0	0	0	0	0	0	1511	72.7	67.54	6.02	4.14	0.88	39.5	5.5	37.5	3.62434	0	NA	NA	NA	NA	0
85497	1	34	1	2	2	3.51	22	72	1198.67	1.1	13.6	108	67	25.4	0	0	0	0	0	0	0	0	0	0	0	0	0	0	946	27.73	33.42	6.59	5.61	1.73	88.6	4.6	33.4	3.50856	0	NA	NA	NA	NA	0
85515	1	21	4	1	2	2.1	9.3	73	414.632	2.5	11.7	108	67	43.5	0	0	0	0	0	0	0	0	0	0	0	0	0	0	1225	55.62	28.07	8.01	5.3	1.45	50	5.4	72.5	4.28359	0	NA	NA	NA	NA	0
85518	1	32	5	2	2	5	7.2	75	240	2.01	11.8	118	57	27.7	0	0	0	0	0	0	0	0	0	0	0	0	0	0	1905	39.35	73.82	10.96	3.57	1.29	15.7	5.5	55	4.00733	0	NA	NA	NA	NA	0
85525	1	40	1	2	0	0.56	18.4	76	445.108	0.4	12.7	111	58	25.2	1	0	0	0	0	0	0	0	0	0	0	0	0	0	1898	104.35	84.15	15.58	6.18	1.24	123	5	23.8	3.16969	0	NA	NA	NA	NA	1
85527	1	40	1	2	2	3.6	10	68	579.8	0.2	13.3	109	67	22.7	0	0	0	0	0	0	0	0	0	0	0	0	0	0	1810	69.05	85.4	9.99	4.27	1.45	25.4	5.5	33.7	3.5175	0	NA	NA	NA	NA	0
85537	1	25	2	2	2	4.04	6.3	73	351	0.5	13.8	96	64	26.9	0	0	0	0	0	0	0	0	0	0	0	0	0	0	2291	76.62	77.61	12.14	3.1	1.09	30	5.1	42.6	3.75185	0	NA	NA	NA	NA	0
85556	1	24	5	2	1	0.63	12.5	73	220	1.3	11.9	110	61	24.5	0	0	0	0	0	0	0	0	0	0	0	0	0	0	1688	39.09	39.77	8.94	4.42	1.24	14.3	5.4	21.6	3.07269	0	NA	NA	NA	NA	0
85566	1	42	3	0	2	1.15	14.9	66	931.579	8.7	14.8	111	60	41.1	1	1	0	0	0	0	0	0	0	0	0	0	0	0	2772	65.18	98.35	9.56	6.54	1.68	117	5.4	36.5	3.59731	14.4	NA	NA	NA	NA	1
85580	1	48	4	1	2	0.95	6.8	71	1405	61.3	13.6	105	70	23.7	0	0	0	0	0	0	0	0	0	0	0	0	0	0	1395	39.91	38.39	6.59	5.33	1.6	100	5.6	46.7	3.84374	0	NA	NA	NA	NA	0
85587	1	49	3	0	2	3.43	11.3	73	415.517	2.3	13.3	108	74	31	1	1	0	0	0	0	0	0	0	0	0	0	0	0	1791	117.63	68.96	10.22	6.26	2.07	40.6	5.5	31.9	3.46261	14	NA	NA	NA	NA	2
85599	1	21	5	2	2	0.85	19	70	286.207	0.4	13.2	115	68	21.9	0	0	0	0	0	0	0	0	0	0	0	0	0	0	1367	50.9	58.41	5.84	5.33	1.99	18.5	5.8	24.2	3.18635	0	NA	NA	NA	NA	0
85611	1	20	5	2	1	2.06	22.4	79	610.6	0.08	12.5	111	77	16.4	0	0	0	0	0	0	0	0	0	0	0	0	0	0	1355	59.03	53.22	6.68	4.91	1.76	35.4	5	26.4	3.27336	0	NA	NA	NA	NA	0
85613	1	37	2	2	2	0	23.3	74	302.4	1.4	13.1	96	66	28.7	0	0	0	0	0	0	0	0	0	0	0	0	0	0	2332	155.89	103.77	13.93	4.65	2.28	29.7	5.1	41.5	3.72569	0	NA	NA	NA	NA	0
85627	1	35	3	0	1	2.15	15.9	72	1103.38	18.9	12.5	126	79	23.9	0	1	0	0	0	1	NA	NA	NA	NA	NA	NA	NA	NA	1661	59.12	51.62	21.51	4.84	1.4	70.6	5.2	29.4	3.38099	7.7	25	NA	NA	NA	0
85631	1	20	2	2	1	3.7	13.1	73	302.062	0.08	13.4	84	58	18.7	0	0	0	0	0	0	0	0	0	0	0	0	0	0	2650	106.28	112.79	14.33	3.59	1.5	20.2	5.1	26.6	3.28091	0	NA	NA	NA	NA	0
85649	1	43	3	0	2	0.6	7.2	67	822.4	0.4	11.8	111	73	19.9	1	0	0	0	0	0	0	0	0	0	0	0	0	0	1173	54.75	42.31	6.75	4.14	1.42	15.6	5.6	30.3	3.41115	0	NA	NA	NA	NA	1
85655	1	27	2	2	2	0.92	14.1	81	758.421	2.1	12.9	109	60	22.5	0	0	0	0	0	0	0	0	0	0	0	0	0	0	2355	67.12	92.94	12.72	4.22	1.11	13.7	4.9	42.5	3.7495	0	NA	NA	NA	NA	0
85661	1	36	3	0	0	2.14	14	68	822.5	5.3	13.8	101	60	22.8	1	0	0	0	0	0	0	0	0	0	0	0	0	0	520	27.6	21.01	4.23	4.58	1.06	210	5.2	25	3.21888	0	NA	NA	NA	NA	1
85676	1	32	4	1	2	2.38	4.1	70	708.083	4.8	9.6	139	93	40.8	1	1	0	1	0	0	0	0	0	0	0	0	0	0	3582	102.34	180.98	17.34	3.85	1.16	10.9	5.6	137	4.91998	23.4	NA	NA	NA	NA	2
85696	1	32	2	2	0	1.86	8.1	63	794.348	0.4	11.1	115	63	20.4	1	1	0	0	0	0	0	0	0	0	0	0	0	0	821	23.24	35.09	4.63	5.22	2.02	7.52	5.8	48.7	3.88568	7.2	NA	NA	NA	NA	1
85702	1	40	1	2	1	1.65	15.6	76	526.571	3.4	14.4	122	82	36.7	0	0	0	1	0	0	0	0	0	0	0	0	0	0	1985	94.02	45.36	26.7	4.06	1.11	55.1	5.2	22.7	3.12236	0	NA	NA	NA	NA	0
85707	1	41	3	0	2	5	17.2	69	493.895	3.6	13.7	123	72	24.6	0	0	0	0	0	0	0	0	0	0	0	0	0	0	2936	110.44	128.52	16.48	4.73	2.15	84.2	4.9	32.7	3.48738	0	NA	NA	NA	NA	0
85722	1	41	1	2	0	0.69	3.9	75	305.276	3.3	10.9	119	63	32.4	0	0	0	0	0	0	0	0	0	0	0	0	0	0	1052	36.14	31.93	8.36	2.87	1.06	3.89	5.7	107	4.67283	0	NA	NA	NA	NA	0
85732	1	34	5	2	2	5	26.3	68	578.842	0.4	13.1	117	71	20.2	0	0	0	0	0	0	0	0	0	0	0	0	0	0	1059	35	38.97	5.29	4.91	2.22	44.2	4.7	39.5	3.6763	0	NA	NA	NA	NA	0
85759	1	43	2	2	2	4.99	14.3	69	452.381	5.7	12.9	113	80	32.3	0	1	0	0	0	0	0	0	0	0	0	0	0	0	1840	83.15	56.84	12.66	6.08	1.16	45.1	5.3	31.3	3.44362	14	NA	NA	NA	NA	0
85781	1	37	1	2	2	2.79	11.5	76	418.333	6.8	13.4	105	69	31.6	0	0	0	0	0	0	0	0	0	0	0	0	0	0	1974	88.62	71.35	12.36	4.86	0.78	111	4.6	40.7	3.70623	0	NA	NA	NA	NA	0
85783	1	32	2	2	2	1.57	8.6	77	503.7	4.7	14	100	58	22.5	1	1	0	0	0	0	0	0	0	0	0	0	0	0	2045	67.08	96.63	10.55	6.1	1.63	43.4	5.1	36.6	3.60005	9.4	NA	NA	NA	NA	2
85785	1	32	1	2	0	1.06	25.6	70	399.6	2.4	12.9	102	59	28.3	0	0	0	0	0	0	0	0	0	0	0	0	0	0	2724	125.27	118.24	19.35	5.3	1.63	55.7	5.8	22.5	3.11352	0	NA	NA	NA	NA	0
85787	1	26	3	0	2	4.46	15.9	78	482.625	0.08	12.9	111	69	19.6	1	0	0	0	0	0	0	0	0	0	0	0	0	0	2947	122.61	92.87	13.86	3.13	1.16	74	4.9	36.5	3.59731	0	NA	NA	NA	NA	2
85789	1	33	4	1	0	2.45	12.5	78	523.947	0.4	13.4	117	60	24.6	0	0	0	0	0	1	1	NA	NA	NA	1	NA	NA	NA	1422	57.98	61.17	9.72	4.97	2.15	87.7	5.3	50.7	3.92593	0	38	NA	NA	NA	0
85817	1	36	3	0	2	1.94	9.1	67	433.92	0.4	13.4	122	81	27.1	0	1	1	0	0	0	0	0	0	0	0	0	0	0	1301	35.86	45.29	15.97	4.55	1.94	42.5	5.6	38.8	3.65842	43.3	NA	NA	NA	NA	0
85819	1	40	2	2	2	1.65	5.9	71	662.391	17.1	11.9	122	72	49.8	0	0	0	0	0	0	0	0	0	0	0	0	0	0	1911	70.81	74.58	11.89	4.09	1.27	84.5	5.5	46.1	3.83081	0	NA	NA	NA	NA	0
85822	1	43	3	0	2	1.69	8.4	74	787.345	14.5	12.9	151	87	42.2	1	0	1	1	1	0	0	0	0	0	0	0	0	0	1600	55.92	59.3	9.67	5.84	1.37	29.7	6.4	44.1	3.78646	0	NA	NA	NA	NA	2
85823	1	28	1	2	0	1.86	8.1	63	427.167	0.6	12.8	113	65	26	0	0	0	0	0	0	0	0	0	0	0	0	0	0	2228	128.64	73.08	16.84	5.51	1.97	11.4	5.7	44.1	3.78646	0	NA	NA	NA	NA	0
85831	1	46	4	1	2	2.18	5.9	69	312.71	2.4	11.3	117	69	31.2	0	0	0	0	0	0	0	0	0	0	0	0	0	0	1683	45.22	31.9	7.04	6.41	1.5	11.8	5.9	70.1	4.24992	0	NA	NA	NA	NA	0
85846	1	25	5	2	2	5	12.2	67	407.143	0.08	12.4	99	57	16.5	0	0	0	0	0	0	0	0	0	0	0	0	0	0	3493	178.9	125.05	22.38	7.34	2.53	9.29	5.5	63.5	4.15104	0	NA	NA	NA	NA	0
85858	1	48	4	1	1	5	20.4	76	219	1.3	11.9	124	71	35.3	0	1	0	1	0	0	0	0	0	0	0	0	0	0	2088	44.4	57.68	7.92	4.76	1.22	142	5.6	18.1	2.89591	61.7	NA	NA	NA	NA	0
85859	1	35	3	0	2	1.43	9.3	65	459.034	2.3	14.7	119	71	48.2	1	0	0	0	0	0	0	0	0	0	0	0	0	0	1129	77.97	56.23	13.2	5.2	1.22	58.6	5.2	34.5	3.54096	0	NA	NA	NA	NA	1
85869	1	23	2	2	2	1.6	22.4	74	526	0.08	12.4	110	79	19.6	0	0	0	0	0	0	0	0	0	0	0	0	0	0	2669	100.99	111.46	24.88	4.34	1.5	54.1	4.7	34.7	3.54674	0	NA	NA	NA	NA	0
85878	1	27	3	0	2	5	16.8	77	798.69	2.4	14	126	71	32.1	0	0	0	0	0	0	0	0	0	0	0	0	0	0	1671	72.9	84.43	12.03	3.98	1.78	74.7	4.9	28.4	3.34639	0	NA	NA	NA	NA	0
85911	1	49	4	1	1	2.16	8.2	69	257.52	18.4	12	116	64	41.7	0	0	0	1	0	0	0	0	0	0	0	0	0	0	1773	58.76	80.81	8.62	4.16	2.07	12.9	6.4	77.9	4.35543	0	NA	NA	NA	NA	0
85912	1	49	4	1	1	0.75	8.4	71	322.258	5.3	12.2	122	79	44.1	0	0	1	1	0	0	0	0	0	0	0	0	0	0	213	9.46	9.89	3.11	4.29	1.37	325	5.9	43.7	3.77735	0	NA	NA	NA	NA	0
85915	1	34	4	1	1	2.67	6.3	81	626.5	1.7	9.4	122	72	22.9	1	0	0	0	0	0	0	0	0	0	0	0	0	0	475	22.34	18.82	3.35	3.1	1.73	14.9	5.1	48	3.8712	0	NA	NA	NA	NA	1
85917	1	31	5	2	2	5	20.2	72	306	1.8	12.2	122	72	26.6	0	0	0	0	0	0	0	0	0	0	0	0	0	0	1911	70.81	74.58	11.89	7.03	1.6	157	5.4	27.3	3.30689	0	NA	NA	NA	NA	0
85936	1	27	2	2	2	2.52	18.3	70	718.25	4.9	13.3	119	65	22.1	0	0	0	0	0	0	0	0	0	0	0	0	0	0	1301	69.2	46.33	10.07	4.63	1.78	10.2	5	50.7	3.92593	0	NA	NA	NA	NA	0
85942	1	46	3	0	2	1.76	15.8	63	450.103	0.9	15.1	99	62	25.4	0	0	0	0	0	0	0	0	0	0	0	0	0	0	2484	85.68	123.66	13.42	4.99	2.15	87.8	5.3	20.3	3.01062	0	NA	NA	NA	NA	0
85948	1	38	4	1	2	0.16	12	75	901	11.7	13.2	133	93	37.5	1	0	1	1	1	0	0	0	0	0	0	0	0	0	1890	52.58	67.57	11.01	5.17	1.66	120	5.5	67.7	4.21509	0	NA	NA	NA	NA	2
85958	1	32	3	0	2	0.88	8.4	76	1273.26	1.2	14.1	110	70	26.6	0	0	0	0	0	0	0	0	0	0	0	0	0	0	1538	56.42	71.23	28.76	5.82	0.96	37.8	4.8	45.8	3.82428	0	NA	NA	NA	NA	0
85994	1	43	1	2	2	5	12	75	436.632	1	13.5	113	73	29.6	0	0	0	1	0	0	0	0	0	0	0	0	0	0	2526	108.42	94.33	15.54	6.03	1.71	21.3	5.1	38.5	3.65066	0	NA	NA	NA	NA	0
86007	1	46	5	2	2	5	8.2	67	1269.92	2.5	13.5	95	49	25.1	0	0	0	0	0	0	0	0	0	0	0	0	0	0	2562	63.68	82.47	22.09	6.05	1.09	74.8	4.9	43	3.7612	0	NA	NA	NA	NA	0
86009	1	33	3	0	2	2.04	15.2	66	306.548	0.3	14.7	116	63	26.5	1	0	0	0	0	0	0	0	0	0	0	0	0	0	1566	38.15	73.43	6.33	4.55	1.34	35.5	5.6	23.6	3.16125	0	NA	NA	NA	NA	1
86011	1	45	5	2	1	5	15.8	78	491.294	2	12.9	109	67	23.5	0	0	1	0	0	0	0	0	0	0	0	0	0	0	1911	70.81	74.58	11.89	4.6	1.6	40.9	5.6	31.6	3.45316	0	NA	NA	NA	NA	0
86022	1	23	3	0	2	0.55	12.9	66	364	1	12.3	115	47	31.1	0	0	0	0	0	0	0	0	0	0	0	0	0	0	2198	106.19	112.23	10.85	3.28	1.47	20.7	4.8	33.3	3.50556	0	NA	NA	NA	NA	0
86027	1	25	3	0	2	0.84	12.2	72	272.167	0.5	13.3	111	69	20.4	0	0	0	0	0	0	0	0	0	0	0	0	0	0	554	27.45	13.68	4.77	4.58	1.4	12	5.4	64.7	4.16976	0	NA	NA	NA	NA	0
86029	1	26	3	0	2	4.54	12.5	70	610.205	8.3	14.2	119	83	39.7	0	0	0	0	0	0	0	0	0	0	0	0	0	0	1777	80.11	75.33	8.89	4.58	0.83	97.3	5.8	44.8	3.80221	0	NA	NA	NA	NA	0
86031	1	22	1	2	2	0.78	5.6	73	699.652	0.3	12.2	124	72	26.7	0	0	0	0	0	0	0	0	0	0	0	0	0	0	1209	33.93	37.07	7.07	2.74	1.34	9.29	5.2	45	3.80666	0	NA	NA	NA	NA	0
86050	1	39	4	1	2	1.07	13.6	73	332.71	6.8	13.8	136	88	34.9	0	0	0	1	0	0	0	0	0	0	0	0	0	0	3220	191.24	130.72	25.08	5.69	0.93	105	5.5	35.9	3.58074	0	NA	NA	NA	NA	0
86051	1	36	4	1	2	1.56	10.2	69	605.238	3.4	10.5	92	54	31.4	0	0	0	0	0	0	0	0	0	0	0	0	0	0	2798	143.53	128.23	21.56	4.27	1.91	52	4.9	58.2	4.06389	0	NA	NA	NA	NA	0
86056	1	33	3	0	2	2.11	11.8	70	452.136	0.9	13.2	117	65	28.6	0	0	0	0	0	0	0	0	0	0	0	0	0	0	1872	75.91	136.99	11.78	3.59	1.37	95.9	5.1	11.8	2.4681	0	NA	NA	NA	NA	0
86059	1	25	5	2	2	1.32	16.3	70	417.172	0.6	13.9	106	65	21.1	0	0	0	0	0	0	0	0	0	0	0	0	0	0	2159	101.07	85.23	12.06	5.61	1.68	56.2	4.8	24.3	3.19048	0	NA	NA	NA	NA	0
86071	1	38	1	2	1	1.23	5.7	77	602.842	7.6	11.4	129	83	56.6	0	0	0	1	0	0	0	0	0	0	0	0	0	0	1634	63.17	62.43	13.09	4.32	1.19	8.42	5.5	53.6	3.98155	0	NA	NA	NA	NA	0
86082	1	49	2	2	2	2.68	9.7	71	316.69	5.6	13.4	129	74	34.3	1	0	1	0	0	0	0	0	0	0	0	0	0	0	2000	95.83	95.52	14.18	5.59	0.96	130	6.3	26.4	3.27336	0	NA	NA	NA	NA	2
86087	1	31	1	2	2	2.36	9.9	72	303.103	12.4	14	133	91	42.4	0	0	1	1	0	0	0	0	0	0	0	0	0	0	2260	64.79	102.01	9.64	5.09	2.43	118	7.1	31.9	3.46261	0	NA	NA	NA	NA	0
86090	1	26	3	0	1	4.22	10.6	75	471.88	3.7	13.7	110	70	22	0	0	0	0	0	0	0	0	0	0	0	0	0	0	2214	85.04	94.3	12.38	3.41	1.5	50.1	4.9	38.7	3.65584	0	NA	NA	NA	NA	0
86105	1	23	4	1	2	0.69	7.5	74	115.875	1	12	122	72	26	0	0	0	0	0	0	0	0	0	0	0	0	0	0	1434	63.23	63.81	14.36	5.09	1.45	14.6	4.8	37.1	3.61362	0	NA	NA	NA	NA	0
86123	1	36	3	0	2	5	19.7	68	429	6.1	13.1	96	66	26.6	0	0	0	0	0	0	0	0	0	0	0	0	0	0	1953	51.72	64.68	9.92	3.62	1.5	26.8	5.2	31.5	3.44999	0	NA	NA	NA	NA	0
86127	1	46	4	1	0	0.5	23.5	70	337.714	6.4	14.1	126	83	31.7	1	0	1	0	0	0	0	0	0	0	0	0	0	0	1666	35.68	65.57	7.97	6.18	1.03	96.4	11.3	29.5	3.38439	0	NA	NA	NA	NA	1
86150	1	47	2	2	0	5	13.6	74	477.794	3	13	116	77	25.4	0	0	0	0	0	1	1	1	NA	NA	NA	NA	NA	NA	2320	111.38	87.19	13.01	5.12	1.63	71	5.5	24.9	3.21487	0	14	NA	NA	NA	0
86158	1	45	3	0	1	0.31	14.3	71	269.571	2.01	13.2	111	64	36.1	1	0	0	1	0	1	1	NA	NA	NA	1	NA	NA	NA	637	13.25	42.6	3.07	4.84	0.93	108	5.6	46.1	3.83081	0	38	NA	NA	NA	1
86167	1	36	1	2	2	5	3.8	74	244.083	5.8	11.9	111	77	32.7	0	0	1	1	0	0	0	0	0	0	0	0	0	0	1634	44.45	80.91	11.96	5.38	1.34	6.91	5.6	75	4.31749	0	NA	NA	NA	NA	0
86169	1	46	5	2	2	3.25	22	67	488.636	0.9	13.7	113	77	23.3	0	0	0	0	0	0	0	0	0	0	0	0	0	0	826	20.14	37.77	3.63	4.58	1.45	56.4	6.3	23.8	3.16969	0	NA	NA	NA	NA	0
86172	1	33	3	0	0	3.23	8.4	80	548	4.8	14.7	110	69	37.7	0	0	0	0	0	0	0	0	0	0	0	0	0	0	1676	115.33	63.92	10.02	3.34	1.29	120	5.2	47.4	3.85862	0	NA	NA	NA	NA	0
86177	1	38	3	0	2	2.56	20.4	59	805.556	0.6	13.9	100	63	23	0	1	0	0	0	0	0	0	0	0	0	0	0	0	1673	66.13	51.43	25.03	4.45	1.76	61.5	5.1	18.4	2.91235	21.6	NA	NA	NA	NA	0
86181	1	42	3	0	2	3.38	12.7	66	484	0.08	12.7	114	73	21.4	0	1	0	0	0	0	0	0	0	0	0	0	0	0	1804	71.47	60.48	10.3	4.24	1.89	36.7	5.1	29.6	3.38777	44.6	NA	NA	NA	NA	0
86188	1	30	4	1	2	2.5	14.3	73	616.941	7.8	13.5	108	67	24.5	0	0	0	0	0	0	0	0	0	0	0	0	0	0	1310	41.54	38.01	21.83	3.39	1.16	32.2	5.4	44.7	3.79997	0	NA	NA	NA	NA	0
86189	1	28	3	0	1	0.99	5.9	71	568.419	4.5	13	97	56	25.6	0	0	0	0	0	0	0	0	0	0	0	0	0	0	3708	63.68	178.48	14.45	4.14	1.71	27.9	5	49.8	3.90801	0	NA	NA	NA	NA	0
86191	1	29	4	1	2	1.76	8.6	70	320	2	12.5	107	71	27.9	0	0	0	0	0	0	0	0	0	0	0	0	0	0	1911	70.81	74.58	11.89	3.7	1.27	17.4	5.7	54.9	4.00551	0	NA	NA	NA	NA	0
86200	1	48	5	2	0	0.91	10.9	71	175.95	3.4	13.4	150	77	33.9	0	0	0	0	0	0	0	0	0	0	0	0	0	0	1911	70.81	74.58	11.89	4.86	1.63	51.6	5.3	51.7	3.94546	0	NA	NA	NA	NA	0
86210	1	47	4	1	1	2.49	10.2	94	416.471	0.5	12.5	209	107	37.3	0	0	0	1	0	0	0	0	0	0	0	0	0	0	2726	75.1	90.44	11.2	4.37	1.16	57.2	5.6	35	3.55535	0	NA	NA	NA	NA	0
86212	1	32	1	2	1	0.25	13.1	69	245	16.2	12.5	123	63	60.7	1	0	0	1	0	0	0	0	0	0	0	0	0	0	1812	70.59	86.28	11.22	5.38	1.32	86.9	6	28.3	3.34286	0	NA	NA	NA	NA	1
86226	1	23	3	0	2	1.7	24.5	77	835.667	0.4	13.5	101	67	20.3	0	1	0	0	0	0	0	0	0	0	0	0	0	0	1985	91.74	90.83	9.59	4.42	1.81	77.3	5.3	28.4	3.34639	14	NA	NA	NA	NA	0
86238	1	45	4	1	2	0.99	9.3	76	395.25	3.4	12.6	127	73	23.6	0	0	0	1	0	0	0	0	0	0	0	0	0	0	2381	87.07	95.45	14.48	4.55	1.91	39.9	5.6	40.7	3.70623	0	NA	NA	NA	NA	0
86245	1	47	3	0	1	0.43	10.6	71	162.5	4.2	13.9	129	77	33.6	0	0	0	0	0	0	0	0	0	0	0	0	0	0	1911	70.81	74.58	11.89	4.99	1.37	95	5.3	32.9	3.49347	0	NA	NA	NA	NA	0
86260	1	26	3	0	1	2.99	11.3	66	363.545	4.8	14.1	119	72	37.7	1	0	0	0	0	0	0	0	0	0	0	0	0	0	2431	101.14	79.55	29.86	7.47	0.83	80.6	4.9	32.3	3.47507	0	NA	NA	NA	NA	1
86262	1	31	4	1	2	5	7.5	62	696.522	23	13.1	109	63	39.5	1	1	1	0	0	0	0	0	0	0	0	0	0	0	2657	84.91	62.17	11.79	3.85	1.27	145	5	31.2	3.44042	87.3	NA	NA	NA	NA	1
86279	1	35	3	0	2	1.05	21.5	73	567.522	4.8	13	119	68	26.8	0	0	0	0	0	0	0	0	0	0	0	0	0	0	1470	46.63	80.81	7.78	4.86	1.84	137	5	24	3.17805	0	NA	NA	NA	NA	0
86290	1	29	3	0	2	1	7	71	539	3.4	12.9	122	72	29.3	0	0	0	0	0	0	0	0	0	0	0	0	0	0	1911	70.81	74.58	11.89	4.47	1.6	41.8	4.9	29.6	3.38777	0	NA	NA	NA	NA	0
86293	1	40	1	2	2	2	12.7	74	567.062	3.4	12.9	111	64	21.9	0	0	0	0	0	0	0	0	0	0	0	0	0	0	2237	93.19	97.75	19.76	4.81	1.29	32.8	5.5	38.7	3.65584	0	NA	NA	NA	NA	0
86297	1	35	3	0	2	1.7	4.5	78	1290.62	0.9	13	125	61	32.6	0	0	0	1	0	0	0	0	0	0	0	0	0	0	770	96.84	31.47	5.94	4.5	1.14	46.2	5	46	3.82864	0	NA	NA	NA	NA	0
86308	1	22	2	2	0	0.2	6.6	72	625.091	11.2	12.1	107	71	31.1	0	0	0	0	0	0	0	0	0	0	0	0	0	0	1900	80.52	61.81	19.17	4.47	1.24	9.4	5.7	47.7	3.86493	0	NA	NA	NA	NA	0
86321	1	25	5	2	2	1.07	9.3	79	324.826	0.7	13.6	108	80	21.9	0	0	0	0	0	0	0	0	0	0	0	0	0	0	1836	74.59	69.42	9.81	4.09	1.66	25.1	5.1	46.8	3.84588	0	NA	NA	NA	NA	0
86322	1	39	2	2	2	1.37	8.4	71	678.5	8.2	12.7	115	68	35.4	0	0	0	0	0	0	0	0	0	0	0	0	0	0	2191	129.9	88.94	12.72	6.13	1.16	18	6.1	62.5	4.13517	0	NA	NA	NA	NA	0
86324	1	29	3	0	2	2.81	24.5	68	341.895	4.7	14	99	65	23.2	0	0	0	0	0	0	0	0	0	0	0	0	0	0	1678	56.72	104.19	9.01	5.2	2.09	21.6	5.6	36.9	3.60821	0	NA	NA	NA	NA	0
86350	1	49	1	2	1	4.94	12.7	73	439.611	9.3	13.3	119	75	33.7	0	0	1	0	0	0	0	0	0	0	0	0	0	0	1332	67.94	61.93	7.89	5.12	1.45	90.1	8.9	37.5	3.62434	0	NA	NA	NA	NA	0
86352	1	31	4	1	2	2.29	12.2	74	281.75	2.5	12.4	113	63	37.4	0	0	0	0	0	0	0	0	0	0	0	0	0	0	762	39.47	19.28	12.78	4.19	1.32	13.6	6.1	69.3	4.23844	0	NA	NA	NA	NA	0
86356	1	49	1	2	0	0.95	9.7	76	837	15.2	14.7	150	86	36.1	0	0	0	0	0	0	0	0	0	0	0	0	0	0	1956	91.18	72.13	20.03	5.77	1.19	39	5.6	44.5	3.79549	0	NA	NA	NA	NA	0
86364	1	42	3	0	1	4.95	19.7	68	486.786	7.8	13.3	118	78	29.5	1	1	0	0	0	0	0	0	0	0	0	0	0	0	3769	85.2	158.32	16.18	4.68	1.37	81.9	5.4	25.6	3.24259	73	NA	NA	NA	NA	2
86384	1	37	3	0	0	0.5	9.3	67	203.4	2.9	13.8	114	72	34.3	1	0	1	1	0	1	1	NA	1	NA	NA	NA	NA	NA	2221	68	77.02	10.8	5.9	1.06	137	6.8	50	3.91202	0	15	NA	NA	NA	1
86399	1	35	5	2	1	2.46	19.5	81	433.188	0.5	14	104	69	23.8	0	0	0	0	0	0	0	0	0	0	0	0	0	0	1911	70.81	74.58	11.89	5.04	1.97	92	5.2	31.7	3.45632	0	NA	NA	NA	NA	0
86409	1	21	4	1	1	1.47	13.1	74	568	2.7	11.7	125	65	43.1	0	0	0	1	0	0	0	0	0	0	0	0	0	0	1268	43.8	62.78	7.56	4.37	1.06	25.7	5.5	57.5	4.05178	0	NA	NA	NA	NA	0
86413	1	44	3	0	2	5	8.1	85	663.812	10.3	14.4	122	72	23.1	1	0	0	1	0	0	0	0	0	0	0	0	0	0	1911	70.81	74.58	11.89	5.51	1.91	162	5.4	30.2	3.40784	0	NA	NA	NA	NA	2
86415	1	21	5	2	2	0.84	15.8	78	874.286	1.1	14.2	114	67	28.3	0	0	0	0	0	0	0	0	0	0	0	0	0	0	1911	70.81	74.58	11.89	5.43	2.04	48.9	5.3	41.8	3.7329	0	NA	NA	NA	NA	0
86425	1	25	1	2	1	0.13	4.3	67	387	19.2	12.2	122	72	49.1	0	0	0	0	0	0	0	0	0	0	0	0	0	0	1911	70.81	74.58	11.89	3.93	1.32	76	5.7	51.1	3.93378	0	NA	NA	NA	NA	0
86436	1	30	3	0	2	1.69	17.9	75	479.15	0.6	13.8	113	69	29.9	0	1	0	0	0	0	0	0	0	0	0	0	0	0	2854	87.8	125.48	19.65	5.07	1.22	92.7	5	26.4	3.27336	28.1	NA	NA	NA	NA	0
86447	1	22	3	0	1	0.75	26	75	203.636	0.4	13.5	109	51	25.9	1	0	0	0	0	0	0	0	0	0	0	0	0	0	2447	44.36	92.64	8.38	3.75	1.47	44.9	4.7	25.4	3.23475	0	NA	NA	NA	NA	1
86453	1	36	5	2	2	5	15	69	420	0.9	13.8	145	99	33.5	0	0	0	1	0	0	0	0	0	0	0	0	0	0	1118	36.42	46.73	5.5	5.07	1.01	58.4	5	60.5	4.10264	0	NA	NA	NA	NA	0
86456	1	36	2	2	2	3.72	15.8	79	508.026	0.08	13.9	97	63	20.3	0	0	0	0	0	0	0	0	0	0	0	0	0	0	1764	73.56	60.87	6.56	5.17	2.09	67.8	5	24.4	3.19458	0	NA	NA	NA	NA	0
86458	1	44	4	1	2	5	8.6	66	262.353	0.7	11	119	72	24.9	0	0	0	0	0	0	0	0	0	0	0	0	0	0	1879	43.41	106.9	8.14	4.73	1.33	12.2	5.8	51.2	3.93574	0	NA	NA	NA	NA	0
86460	1	37	3	0	2	0.6	8.6	71	519.231	2.4	12.1	106	71	39.6	0	0	0	0	0	0	0	0	0	0	0	0	0	0	1904	76.82	55.13	9.84	6.18	1.53	38.5	5.1	57.2	4.04655	0	NA	NA	NA	NA	0
86461	1	31	2	2	2	1.89	15.9	71	544.133	2.4	12.8	116	65	37.4	0	0	0	0	0	0	0	0	0	0	0	0	0	0	2627	86.33	128.87	12.11	5.3	1.03	156	5.8	24.9	3.21487	0	NA	NA	NA	NA	0
86467	1	23	1	2	2	1.36	6.6	78	1584	1.7	14.3	102	50	23.2	0	0	0	0	0	0	0	0	0	0	0	0	0	0	2228	118.41	133.23	51.79	5.02	1.5	34.5	4.9	35.3	3.56388	0	NA	NA	NA	NA	0
86472	1	30	3	0	2	4.38	12.2	71	796.211	11.3	13.9	119	57	27.8	1	1	0	0	0	0	0	0	0	0	0	0	0	0	2055	65.23	106.56	6.08	4.73	2.12	105	5.1	37.5	3.62434	38.4	NA	NA	NA	NA	2
86482	1	46	3	0	0	0.98	19.7	78	608	18.9	15.1	122	72	31.8	1	0	0	1	1	0	0	0	0	0	0	0	0	0	2124	223.93	89.11	10.34	6.8	0.75	62.2	5.4	47.9	3.86912	0	NA	NA	NA	NA	1
86493	1	44	3	0	2	0.74	13.6	73	354	0.6	13.6	113	74	28	1	0	0	0	0	0	0	0	0	0	0	0	0	0	1345	45.16	40.36	11.64	4.27	1.19	28.4	5.1	45.4	3.81551	0	NA	NA	NA	NA	2
86510	1	36	2	2	2	1.1	11.8	68	502.421	4.5	12.4	122	72	42.5	0	0	0	0	0	0	0	0	0	0	0	0	0	0	990	28.48	17.98	6.55	4.84	1.73	54.2	5.6	30.6	3.421	0	NA	NA	NA	NA	0
86520	1	39	3	0	2	5	12.4	76	736	10.6	13.6	124	83	36.5	0	0	0	0	0	0	0	0	0	0	0	0	0	0	1862	58.89	86.91	11.07	3.21	1.09	67.4	5.1	53	3.97029	0	NA	NA	NA	NA	0
86528	1	37	4	1	2	1.76	8.8	78	181.5	1.4	11.6	133	81	23.9	0	0	0	0	0	0	0	0	0	0	0	0	0	0	1319	50.59	45.54	9.08	3.26	1.01	51	5.6	51.6	3.94352	0	NA	NA	NA	NA	0
86534	1	43	4	1	2	2.2	11.8	73	640.441	3	12.9	124	83	35.6	0	1	0	1	0	0	0	0	0	0	0	0	0	0	2873	138.93	118.62	21.04	5.69	1.6	59.1	5.3	41.4	3.72328	46.8	NA	NA	NA	NA	0
86552	1	37	3	0	1	1.06	5.6	71	957.882	0.8	12.4	109	68	23.1	1	1	0	0	0	0	0	0	0	0	0	0	0	0	2219	74.33	122.35	10.04	5.64	2.22	6.05	5	90.9	4.50976	39.8	NA	NA	NA	NA	2
86556	1	31	4	1	2	2.81	13.6	79	231.731	4.5	13.4	103	71	31.7	0	0	0	0	0	0	0	0	0	0	0	0	0	0	4153	129.02	172.93	24.48	5.59	1.97	38.9	5.7	50.6	3.92395	0	NA	NA	NA	NA	0
86566	1	40	4	1	2	2.01	15.9	75	270	0.6	14.2	119	73	22	1	1	0	0	0	0	0	0	0	0	0	0	0	0	1142	17.13	41.75	6.96	5.02	2.17	112	4.8	39.1	3.66612	30.9	NA	NA	NA	NA	2
86568	1	46	3	0	2	3.99	3.2	69	209.143	0.8	10.6	124	66	23.2	1	1	0	0	0	0	0	0	0	0	0	0	0	0	2389	89.75	68.69	22.45	3.8	1.76	9.5	5.3	77.5	4.35028	21.6	NA	NA	NA	NA	2
86572	1	40	5	2	2	0.85	18.1	74	385.208	0.4	14.2	132	77	21.6	0	0	0	1	0	0	0	0	0	0	0	0	0	0	2275	98.38	52.23	17.76	5.15	1.01	136	5.1	34.9	3.55249	0	NA	NA	NA	NA	0
86586	1	28	1	2	0	2.15	9.5	72	828	1	13.7	139	74	37.9	1	0	0	1	0	0	0	0	0	0	0	0	0	0	1218	124.98	47.02	5.08	3.67	0.85	57.3	4.7	34.6	3.54385	0	NA	NA	NA	NA	2
86590	1	42	5	2	2	4.08	11.1	69	544	10.3	14.1	113	71	36.9	0	0	0	0	0	0	0	0	0	0	0	0	0	0	2435	113.96	99.27	19.74	5.33	0.96	190	5.9	27.8	3.32504	0	NA	NA	NA	NA	0
86600	1	25	3	0	1	1.26	15.6	72	797.545	1.7	13.8	107	55	23.6	0	0	0	0	0	0	0	0	0	0	0	0	0	0	2630	108.89	103.94	18.91	4.45	1.58	19.5	5.4	40.7	3.70623	0	NA	NA	NA	NA	0
86607	1	30	4	1	2	3.4	3.2	72	1516	4.5	12.7	123	64	35.9	1	0	0	0	0	0	0	0	0	0	0	0	0	0	1589	75.79	63.56	9.05	4.47	1.11	8.86	5.5	86.4	4.45899	0	NA	NA	NA	NA	1
86613	1	38	3	0	0	3.52	13.6	78	522.947	0.5	13.4	107	76	21.9	0	0	0	0	0	0	0	0	0	0	0	0	0	0	1777	56.09	68.4	18.37	4.16	1.66	69.6	4.8	36.5	3.59731	0	NA	NA	NA	NA	0
86618	1	34	5	2	2	1.24	13.1	71	391.5	2.5	13.1	119	78	29.5	0	0	0	1	0	0	0	0	0	0	0	0	0	0	1911	43.19	46.73	13.55	5.43	0.7	41.1	5.8	40.4	3.69883	0	NA	NA	NA	NA	0
86626	1	41	5	2	2	4.96	15.6	77	561.667	10.9	14.3	146	83	31.3	0	0	0	1	0	0	0	0	0	0	0	0	0	0	3241	79.66	118.27	36.91	2.97	0.8	125	6	34.2	3.53223	0	NA	NA	NA	NA	0
86629	1	23	3	0	2	1.52	15.4	74	660	0.3	12.7	106	62	25.1	0	0	0	0	0	0	0	0	0	0	0	0	0	0	1911	70.81	74.58	11.89	3.72	1.86	14.9	5.1	34.5	3.54096	0	NA	NA	NA	NA	0
86632	1	24	4	1	0	0.33	7.2	74	415.227	11.1	12.5	122	72	33.6	0	0	0	0	0	0	0	0	0	0	0	0	0	0	3176	68.3	137.65	31.86	4.19	1.37	26.7	5.4	42.8	3.75654	0	NA	NA	NA	NA	0
86637	1	40	4	1	2	4.23	19	72	132.706	0.3	11.9	112	73	21.6	0	1	0	0	0	0	0	0	0	0	0	0	0	0	1933	100.43	56.47	7.75	4.45	2.46	112	5.1	42.4	3.74715	26	NA	NA	NA	NA	0
86639	1	46	4	1	1	0.89	4.3	78	588.5	2.3	11	130	87	28	0	0	0	0	0	0	0	0	0	0	0	0	0	0	2312	63.58	101.25	13.94	5.72	2.82	7.24	5.3	104	4.64439	0	NA	NA	NA	NA	0
86645	1	45	3	0	2	1.61	30.4	62	797.538	0.7	12.5	109	56	28.7	1	0	0	0	0	0	0	0	0	0	0	0	0	0	2711	177.38	128.89	18.08	4.45	1.81	30.7	4.9	19.5	2.97041	0	NA	NA	NA	NA	2
86649	1	32	1	2	1	0.17	4.7	74	1154.21	13	12	113	75	54	0	0	0	0	0	0	0	0	0	0	0	0	0	0	949	61.51	24.29	7.83	4.27	0.93	31.4	5.5	91.2	4.51305	0	NA	NA	NA	NA	0
86681	1	44	2	2	2	1.47	15	70	425.5	0.08	13.9	107	69	19.9	0	0	0	0	0	0	0	0	0	0	0	0	0	0	2971	93.15	163.15	17.8	4.84	2.15	78.5	5.6	27	3.29584	0	NA	NA	NA	NA	0
86686	1	37	4	1	2	3.09	21	68	1185.6	0.3	13.4	107	69	33.9	1	0	0	0	0	0	0	0	0	0	0	0	0	0	1773	104.44	56.98	9.83	4.29	2.4	201	5.2	18.9	2.93916	0	NA	NA	NA	NA	2
86697	1	42	4	1	2	0.21	4.3	77	506.647	5.6	10.2	159	93	38.2	0	0	0	1	0	0	0	0	0	0	0	0	0	0	1124	33.97	52.81	2.83	5.97	1.06	7.21	5.8	114	4.7362	0	NA	NA	NA	NA	0
86707	1	30	4	1	2	1.36	11.1	68	306.923	6	12.9	110	69	38.4	1	1	0	0	0	0	0	0	0	0	0	0	0	0	3258	91.16	147.56	16.17	3.83	1.34	60.6	5.7	42.8	3.75654	14	NA	NA	NA	NA	2
86720	1	34	1	2	2	5	11.6	73	329.64	0.3	14.5	100	68	20.6	1	0	0	0	0	0	0	0	0	0	0	0	0	0	2406	75.19	95.35	14.09	5.43	1.99	23.9	5.5	30	3.4012	0	NA	NA	NA	NA	1
86728	1	32	2	2	2	1.06	12	74	606.316	0.08	13.2	108	63	22.1	0	0	0	0	0	0	0	0	0	0	0	0	0	0	1737	58.87	45.01	11.46	4.99	1.91	54.8	4.9	27.3	3.30689	0	NA	NA	NA	NA	0
86736	1	45	3	0	2	5	7.2	69	427.368	3.3	14.9	113	79	20.5	1	1	0	0	0	0	0	0	0	0	0	0	0	0	2700	80.68	94.47	8.94	4.91	2.22	48.9	5.1	43.3	3.76815	92.9	NA	NA	NA	NA	2
86752	1	35	3	0	1	1.32	26.9	70	310.8	1	14.9	109	65	24.7	1	1	0	0	0	0	0	0	0	0	0	0	0	0	2003	61.95	96.93	13.42	3.98	1.68	61.4	5	22.1	3.09558	20.2	NA	NA	NA	NA	2
86761	1	40	5	2	2	5	11.8	69	219.778	0.08	12.6	109	73	20.1	0	1	0	0	0	0	0	0	0	0	0	0	0	0	1990	136.04	74.14	15.41	3.88	2.04	56.5	5.5	19.5	2.97041	4.8	NA	NA	NA	NA	0
86776	1	28	1	2	1	1.86	13.1	79	398.667	3.6	13.4	93	64	28.5	0	1	0	0	0	0	0	0	0	0	0	0	0	0	1710	94.55	79.8	9.52	5.66	1.16	61.5	5	26.6	3.28091	9.4	NA	NA	NA	NA	0
86785	1	49	2	2	0	3.17	7.5	65	385.333	1.3	11.4	135	68	33.5	1	0	0	1	0	0	0	0	0	0	0	0	0	0	1829	91.03	82.93	8.92	5.53	1.14	4.6	5.5	73	4.29046	0	NA	NA	NA	NA	1
86795	1	35	5	2	2	0.05	12.5	76	626.294	7.8	14	122	72	36	0	0	0	0	0	0	0	0	0	0	0	0	0	0	2008	76.49	91.42	12.67	5.66	1.09	49.7	5.6	42.2	3.74242	0	NA	NA	NA	NA	0
86800	1	36	5	2	2	1.73	7.5	69	375.96	1.7	13.1	122	72	24	0	0	0	0	0	0	0	0	0	0	0	0	0	0	1911	70.81	74.58	11.89	2.9	1.4	86.1	5.6	35.2	3.56105	0	NA	NA	NA	NA	0
86802	1	30	4	1	2	1.1	4.8	67	383.692	11.4	12.4	123	74	48.1	0	0	0	1	0	0	0	0	0	0	0	0	0	0	1182	24.13	38.5	5.29	3.75	1.03	33.3	5.6	40.1	3.69138	0	NA	NA	NA	NA	0
86805	1	31	2	2	1	0.92	17.2	67	495.704	2.4	12.5	111	62	32.8	1	1	0	0	0	0	0	0	0	0	0	0	0	0	956	29.09	37.06	3.82	3.75	1.03	120	5.6	24.4	3.19458	14.4	NA	NA	NA	NA	1
86810	1	36	5	2	2	2.29	14.5	74	433.429	19	12.5	123	84	37.4	0	0	0	1	0	0	0	0	0	0	0	0	0	0	1007	30.09	54.51	6.46	4.22	0.88	132	5.5	36.2	3.58906	0	NA	NA	NA	NA	0
86833	1	26	3	0	2	2.81	14.7	70	259.839	14.1	13.5	133	76	27	0	0	0	0	0	0	0	0	0	0	0	0	0	0	1752	55.23	70.83	7.96	4.55	1.71	28.7	5.1	34.8	3.54962	0	NA	NA	NA	NA	0
86838	1	44	3	0	2	5	9	77	436.8	3.3	14.4	129	74	34.4	1	0	0	0	0	0	0	0	0	0	0	0	0	0	2565	113.34	113.33	11.91	5.48	0.8	20.2	5.7	38.4	3.64806	0	NA	NA	NA	NA	1
86841	1	23	2	2	2	3.52	11.3	64	310.154	3.4	13.1	111	74	40.4	0	0	0	0	0	0	0	0	0	0	0	0	0	0	2233	80.97	85.1	7.18	3.31	1.22	54.5	5.7	26.1	3.26194	0	NA	NA	NA	NA	0
86855	1	39	2	2	2	1.03	6.8	67	895.333	4.3	13.1	129	81	57.2	0	0	0	1	0	0	0	0	0	0	0	0	0	0	672	24.42	24.39	4.67	3.59	0.91	33.1	5.5	59.2	4.08092	0	NA	NA	NA	NA	0
86863	1	24	1	2	2	5	12.2	64	458.857	4.5	13.1	117	73	28.7	0	0	0	0	0	0	0	0	0	0	0	0	0	0	1525	78.16	70.62	9.72	4.4	0.96	33.6	5.2	31	3.43399	0	NA	NA	NA	NA	0
86868	1	22	2	2	2	2.6	11.6	73	341.765	0.08	12.5	93	58	18.1	0	0	0	0	0	0	0	0	0	0	0	0	0	0	2071	152.61	61.41	13.13	3.54	1.86	9.31	5.4	49.2	3.89589	0	NA	NA	NA	NA	0
86876	1	38	5	2	2	4.94	17	70	635.385	0.2	12.9	111	73	25.3	0	1	0	0	0	0	0	0	0	0	0	0	0	0	3083	116.95	151.24	19.42	5.2	1.84	18.7	5.1	38.5	3.65066	7.4	NA	NA	NA	NA	0
86882	1	41	1	2	0	2.74	17.6	73	345.207	5.7	14.3	102	69	37.1	0	1	1	0	0	0	0	0	0	0	0	0	0	0	1918	78.77	63.56	13.01	4.34	1.06	254	11.7	29	3.3673	14	NA	NA	NA	NA	0
86889	1	47	3	0	1	0.16	10.6	70	684.913	2.7	13.7	166	103	25.4	1	0	0	0	0	0	0	0	0	0	0	0	0	0	2104	64.33	51.04	10.42	6.05	0.8	28.2	5.8	54.2	3.99268	0	NA	NA	NA	NA	1
86905	1	26	3	0	2	4.39	13.8	70	708.333	10.9	14	103	67	36	1	0	0	0	0	0	0	0	0	0	0	0	0	0	1422	144.3	46.23	7.54	3.62	1.09	56.4	5.1	39.9	3.68638	0	NA	NA	NA	NA	2
86908	1	41	1	2	1	5	12.4	70	217.147	1.6	13.5	118	73	26.5	0	0	0	0	0	0	0	0	0	0	0	0	0	0	965	34.23	37.49	2.02	6.49	0.91	75.2	5.2	40	3.68888	0	NA	NA	NA	NA	0
86922	1	33	5	2	2	5	27.8	71	362.211	0.2	12.9	123	78	19.6	0	0	0	0	0	0	0	0	0	0	0	0	0	0	1745	62.24	67.45	15.33	4.5	2.17	37.1	5.4	26.6	3.28091	0	NA	NA	NA	NA	0
86923	1	31	5	2	2	5	9.1	77	585	2.6	12.6	101	60	27.6	0	0	0	0	0	0	0	0	0	0	0	0	0	0	1911	70.81	74.58	11.89	5.48	1.37	25	5.5	59.1	4.07923	0	NA	NA	NA	NA	0
86933	1	30	1	2	1	0.62	13.6	70	605.647	0.8	13.6	109	68	28.2	1	0	0	0	0	0	0	0	0	0	0	0	0	0	2022	96.19	69.37	12.17	3.1	1.6	39.9	5.3	28.4	3.34639	0	NA	NA	NA	NA	2
86959	1	36	5	2	2	5	14.1	76	502.286	0.08	13.7	112	75	21.3	0	1	0	0	0	0	0	0	0	0	0	0	0	0	2225	102.92	88.41	8.44	4.6	2.15	54.1	5.1	29.7	3.39115	13.5	NA	NA	NA	NA	0
86960	1	22	3	0	2	0.64	17.4	78	277.5	0.9	14.7	99	53	24.2	0	0	0	0	0	0	0	0	0	0	0	0	0	0	3054	99.33	113.19	32.3	3.75	1.53	38.6	4.8	54.6	4.00003	0	NA	NA	NA	NA	0
86961	1	25	3	0	2	3.65	16.1	76	577.379	2.8	13.1	100	66	23.9	0	0	0	0	0	0	0	0	0	0	0	0	0	0	836	34.61	54.59	7.26	4.97	1.47	88.4	4.8	30.9	3.43076	0	NA	NA	NA	NA	0
86968	1	25	2	2	1	2.72	7.2	70	1081.88	5.4	13	113	75	45.2	1	1	0	1	0	0	0	0	0	0	0	0	0	0	1921	35.67	22.37	2.47	4.09	1.58	25.6	5.4	36.2	3.58906	93.6	NA	NA	NA	NA	1
86972	1	42	4	1	2	5	21	72	656.667	0.08	13.3	128	80	24.3	0	0	0	0	0	0	0	0	0	0	0	0	0	0	878	26.47	26.8	5.25	4.45	2.09	39.1	5.4	36.6	3.60005	0	NA	NA	NA	NA	0
86981	1	27	3	0	1	1.24	24.9	70	992	1	14	114	57	20.9	1	1	0	0	0	0	0	0	0	0	0	0	0	0	2029	87.04	59.94	13.88	3.39	1.55	41.1	4.8	19.9	2.99072	28.1	NA	NA	NA	NA	1
86990	1	35	3	0	2	2.81	9.3	69	255.938	0.4	12.4	107	77	28.9	0	0	0	0	0	0	0	0	0	0	0	0	0	0	1319	55.46	48.18	10.7	3.8	1.89	8.96	4.9	49.1	3.89386	0	NA	NA	NA	NA	0
86996	1	41	5	2	2	4.95	15.2	73	490.6	0.08	13.1	121	72	21.9	0	0	0	0	0	0	0	0	0	0	0	0	0	0	1584	60.62	39.62	9.1	3.03	1.27	35.8	5.2	34	3.52636	0	NA	NA	NA	NA	0
87005	1	31	1	2	2	1.35	11.1	76	512.457	4.9	13.5	108	54	30	1	0	0	0	0	0	0	0	0	0	0	0	0	0	2335	96.42	90.1	11.27	4.47	0.83	21.4	5.8	48.1	3.87328	0	NA	NA	NA	NA	2
87007	1	45	3	0	2	3.09	11.5	62	419.76	4.8	13.7	134	80	39.4	1	0	0	0	0	0	0	0	0	0	0	0	0	0	2418	72.67	73.34	9.65	6.93	0.85	284	7.7	24.2	3.18635	0	NA	NA	NA	NA	1
87018	1	49	2	2	2	3.63	5.6	71	581.053	4	12.5	122	43	29.2	0	0	0	1	0	1	NA	NA	NA	NA	NA	NA	NA	NA	1258	36.05	46.58	5.4	4.11	1.32	7.89	5.6	86.5	4.46014	0	24	NA	NA	NA	0
87026	1	21	1	2	0	0.95	15.4	74	453.158	1.6	12.7	107	64	33.5	0	0	1	0	0	0	0	0	0	0	0	0	0	0	4144	161.71	170.33	23.01	4.32	1.58	34.3	5.4	20.5	3.02042	0	NA	NA	NA	NA	0
87028	1	27	4	1	2	1.29	8.8	66	380.9	3.4	11.3	123	57	34.8	0	0	0	0	0	0	0	0	0	0	0	0	0	0	1229	57.91	64.09	7.03	4.27	1.45	22.9	5.7	33.9	3.52342	0	NA	NA	NA	NA	0
87030	1	36	3	0	2	0.13	16.8	75	751.667	3.6	14.8	120	77	29.1	1	1	0	0	0	0	0	0	0	0	0	0	0	0	1416	53.73	40.83	6.66	5.95	2.12	107	5.5	28	3.3322	67	NA	NA	NA	NA	1
87031	1	48	3	0	2	2.82	9.3	58	316.061	2.2	13	115	55	36.8	0	0	0	0	0	0	0	0	0	0	0	0	0	0	2726	92.02	147.32	17.16	4.37	1.34	22.8	5.4	46	3.82864	0	NA	NA	NA	NA	0
87039	1	37	5	2	2	4.96	13.3	74	757.333	0.4	14	99	72	18.6	0	0	0	0	0	0	0	0	0	0	0	0	0	0	1826	106.96	46.51	6.61	4.97	1.76	40	5.1	41.3	3.72086	0	NA	NA	NA	NA	0
87044	1	32	4	1	2	1.1	2.1	68	320.143	0.08	8.9	169	105	27.5	1	0	0	1	0	0	0	0	0	0	0	0	0	0	3016	85.28	117.49	27.48	6.44	1.73	4.86	5.2	166	5.11199	0	NA	NA	NA	NA	1
87046	1	32	3	0	2	0.74	16.3	71	476.483	0.9	13.2	110	70	24.4	0	0	0	0	1	0	0	0	0	0	0	0	0	0	2387	67.15	133.25	13.11	3.7	1.03	41.4	5.5	28	3.3322	0	NA	NA	NA	NA	0
87050	1	46	5	2	2	0.75	7.2	70	1082.72	50.5	11.4	98	62	46	0	0	1	1	0	0	0	0	0	0	0	0	0	0	4089	206.11	236.76	27.64	6.57	1.37	52.8	15	74.2	4.30676	0	NA	NA	NA	NA	0
87053	1	34	1	2	0	1.28	19	69	275	0.7	13.8	105	62	35.3	0	0	0	0	0	0	0	0	0	0	0	0	0	0	1915	61.33	35.93	17.91	4.47	1.53	164	4.5	33.3	3.50556	0	NA	NA	NA	NA	0
87066	1	28	5	2	2	1.73	2.3	75	112.839	6.4	9.4	112	58	23	0	0	0	0	0	0	0	0	0	0	0	0	0	0	3820	119.75	146.18	21.21	4.68	1.76	5.84	5.9	151	5.01728	0	NA	NA	NA	NA	0
87088	1	27	4	1	2	0.97	2	81	355.826	0.9	8.1	128	81	23.4	0	0	0	0	0	0	0	0	0	0	0	0	0	0	2429	124.36	108.22	25.93	4.22	1.71	4.86	5.2	127	4.84419	0	NA	NA	NA	NA	0
87090	1	34	2	2	1	2.2	17.7	73	462.778	1.6	13.6	96	66	32.1	0	0	0	0	0	0	0	0	0	0	0	0	0	0	1479	62.49	59.54	11.74	4.65	1.4	109	5	38.5	3.65066	0	NA	NA	NA	NA	0
87100	1	23	5	2	2	1.85	11.1	73	1026.89	3.3	14.3	126	89	25.6	1	0	0	0	0	0	0	0	0	0	0	0	0	0	1960	54.58	80.69	11.87	5.48	0.83	29.5	5.6	62	4.12713	0	NA	NA	NA	NA	1
87120	1	21	3	0	2	5	10.6	78	373.895	0.08	13.1	116	73	19.3	0	0	0	0	0	0	0	0	0	0	0	0	0	0	1575	27.43	41.6	7.73	4.68	1.71	21.3	5.3	36.5	3.59731	0	NA	NA	NA	NA	0
87129	1	28	5	2	2	4.12	16.1	66	451.789	1	13.5	104	73	22.1	0	1	0	0	0	0	0	0	0	0	0	0	0	0	2049	61.25	84.62	24.32	3.96	1.47	27.3	5.2	22.5	3.11352	17	NA	NA	NA	NA	0
87130	1	42	3	0	2	0.86	10.7	75	572	3.5	13.2	127	79	30.9	1	0	0	1	0	0	0	0	0	0	0	0	0	0	2050	51.1	95.75	8.56	5.04	1.03	31.4	4.9	27.6	3.31782	0	NA	NA	NA	NA	2
87154	1	30	1	2	0	0.77	10.9	72	313.6	0.8	13.8	114	67	25.9	0	0	0	1	0	0	0	0	0	0	0	0	0	0	2237	92.6	65.67	10.76	7.16	1.09	32.9	5.4	34.6	3.54385	0	NA	NA	NA	NA	0
87159	1	22	1	2	1	0.92	7.2	67	337.5	7.8	12.8	117	61	32.9	0	0	1	0	0	0	0	0	0	0	0	0	0	0	1001	37.62	29.76	8.85	3.78	0.96	35.3	6.3	33.5	3.51155	0	NA	NA	NA	NA	0
87162	1	35	1	2	2	1.94	4.5	71	586.143	4.4	11	109	64	36.7	0	0	0	0	0	0	0	0	0	0	0	0	0	0	1381	60.42	55.22	14.43	5.12	1.24	8.86	5.4	82.2	4.40916	0	NA	NA	NA	NA	0
87163	1	44	3	0	2	2.06	7.5	68	658.316	15.6	13.1	124	71	43.5	1	0	0	0	0	0	0	0	0	0	0	0	0	0	1367	57.75	45.39	10.33	6.34	1.4	18.4	5.6	93.6	4.53903	0	NA	NA	NA	NA	2
87169	1	39	3	0	2	5	11.8	74	1101.46	6.5	12.7	107	76	21.4	1	1	0	0	0	0	0	0	0	0	0	0	0	0	2129	92.37	89.97	13.69	4.5	1.66	142	5.3	36.8	3.6055	1.6	NA	NA	NA	NA	2
87171	1	40	1	2	2	1.41	25.6	71	1260.09	4.5	14.2	122	72	27	0	0	0	0	0	0	0	0	0	0	0	0	0	0	622	26.01	18	2.94	4.32	1.63	57.1	5.1	34.8	3.54962	0	NA	NA	NA	NA	0
87174	1	27	3	0	2	0.62	7.9	73	1429.33	3	13.4	122	72	21.3	1	0	0	0	0	0	0	0	0	0	0	0	0	0	1911	70.81	74.58	11.89	5.48	1.89	52.9	5.3	28.1	3.33577	0	NA	NA	NA	NA	2
87185	1	24	1	2	1	2.64	15.2	74	566.923	3.9	12.4	95	67	30.7	0	0	0	0	0	0	0	0	0	0	0	0	0	0	1732	86.67	77.31	15.51	3.83	1.16	49	5.3	26.2	3.26576	0	NA	NA	NA	NA	0
87194	1	31	4	1	2	4.28	8.6	61	274.667	0.9	11.6	114	75	28.1	0	0	0	0	0	0	0	0	0	0	0	0	0	0	1032	40.86	41.5	5.94	5.02	1.47	7.02	4.9	72.7	4.28634	0	NA	NA	NA	NA	0
87200	1	28	3	0	2	5	11.6	70	282.24	0.08	13	106	59	20.3	0	0	0	0	0	0	0	0	0	0	0	0	0	0	2656	97.46	115.34	11.52	4.06	1.55	55	5.3	30.8	3.42751	0	NA	NA	NA	NA	0
87219	1	42	4	1	1	3.67	10	69	599.2	0.5	14	139	77	25.3	0	0	0	0	0	0	0	0	0	0	0	0	0	0	955	24.65	26.96	9.94	5.38	0.85	86	5.4	42.8	3.75654	0	NA	NA	NA	NA	0
87226	1	41	5	2	0	1.84	22.9	73	442.25	0.3	13.1	109	74	21.8	0	0	0	0	0	0	0	0	0	0	0	0	0	0	1911	70.81	74.58	11.89	4.22	2.04	79.5	5.1	23	3.13549	0	NA	NA	NA	NA	0
87229	1	43	3	0	2	3.71	26.3	70	904.138	0.6	13.9	109	66	24.5	0	1	0	0	0	0	0	0	0	0	0	0	0	0	2901	92.18	98.06	28.07	5.28	1.58	230	5.3	24.7	3.2068	14	NA	NA	NA	NA	0
87236	1	45	2	2	2	3.54	5.4	76	380.303	6.1	8.8	121	67	33.4	0	0	1	0	0	0	0	0	0	0	0	0	0	0	1560	56.74	64.53	9.14	5.64	1.06	8.1	9.8	175	5.16479	0	NA	NA	NA	NA	0
87243	1	33	2	2	0	0.56	11.3	68	451.043	1	13.1	135	77	34.5	0	0	0	0	0	1	1	NA	1	NA	NA	NA	NA	NA	981	30.82	22.85	5.99	4.45	1.4	89.1	5.4	43.1	3.76352	0	15	NA	NA	NA	0
87255	1	45	4	1	2	5	20.8	59	1012	3	9.8	113	60	28.7	0	0	0	1	0	0	0	0	0	0	0	0	0	0	1672	66.91	54.13	7.17	5.53	1.45	12.5	5.4	44.5	3.79549	0	NA	NA	NA	NA	0
87258	1	30	2	2	2	2.59	20.4	67	300.808	11.8	13	117	57	26.4	1	1	0	0	0	0	0	0	0	0	0	0	0	0	1687	53.76	64.29	7.67	4.84	2.15	60.3	5.1	29.3	3.37759	18.6	NA	NA	NA	NA	1
87276	1	44	1	2	1	1.23	8.2	64	320	3.8	13.1	107	73	29.2	0	0	0	0	0	0	0	0	0	0	0	0	0	0	2073	163.17	78.38	29.8	5.46	1.63	89.2	5	36.9	3.60821	0	NA	NA	NA	NA	0
87277	1	25	1	2	2	2.33	4.7	66	1254.58	33.9	11.6	131	62	63.9	0	0	0	0	0	0	0	0	0	0	0	0	0	0	2742	113.94	103.11	17.4	5.64	0.85	120	5.9	53.2	3.97406	0	NA	NA	NA	NA	0
87281	1	48	3	0	0	1.62	11.3	72	664.222	3.8	13.4	125	65	22.4	1	0	0	1	0	0	0	0	0	0	0	0	0	0	956	23.83	9.19	54.54	3.62	0.93	66.4	5.9	29.4	3.38099	0	NA	NA	NA	NA	1
87283	1	42	4	1	0	2.46	12.7	79	146.483	1.4	13	113	65	30.3	0	0	0	0	0	0	0	0	0	0	0	0	0	0	966	58.75	30.81	7.6	4.11	1.42	28.8	5.4	46.4	3.8373	0	NA	NA	NA	NA	0
87289	1	37	4	1	1	1.19	2.9	76	672.75	0.4	8.6	111	45	19.3	1	0	0	1	0	0	0	0	0	0	0	0	0	0	3458	93.98	167.5	15.12	4.16	1.24	7.35	4.9	140	4.94164	0	NA	NA	NA	NA	1
87297	1	46	5	2	2	4.22	11.6	64	553.438	0.3	13.7	105	79	30.9	0	0	0	0	0	0	0	0	0	0	0	0	0	0	1665	51.48	74.17	13.85	3.9	2.35	131	5.3	32.3	3.47507	0	NA	NA	NA	NA	0
87303	1	40	1	2	2	1.19	8.2	74	486.733	1.8	13.2	110	69	23.1	0	0	0	1	0	0	0	0	0	0	0	0	0	0	2292	68.89	122.15	8.21	4.09	1.11	23.1	5.5	24.1	3.18221	0	NA	NA	NA	NA	0
87311	1	47	3	0	2	5	20.2	69	370.333	0.5	13.4	105	67	23.1	0	0	0	0	0	0	0	0	0	0	0	0	0	0	2503	74.33	119.63	12.29	4.09	2.15	136	4.8	33	3.49651	0	NA	NA	NA	NA	0
87315	1	30	5	2	2	5	16.3	71	549.947	0.6	12.5	107	77	30.5	0	0	0	0	0	0	0	0	0	0	0	0	0	0	3859	204.6	230.87	33.29	5.09	1.99	22.8	5.5	62.5	4.13517	0	NA	NA	NA	NA	0
87326	1	25	3	0	2	1.27	13.4	73	386.158	0.5	13.9	106	63	21.5	0	0	0	0	0	0	0	0	0	0	0	0	0	0	1911	70.81	74.58	11.89	5.33	2.02	7.24	5.5	50.4	3.91999	0	NA	NA	NA	NA	0
87330	1	36	3	0	1	0.74	9.5	71	573.231	5.2	12.9	100	66	26.6	0	0	0	0	0	0	0	0	0	0	0	0	0	0	1733	77.25	55.25	11.32	5.02	1.73	20	5.1	33.5	3.51155	0	NA	NA	NA	NA	0
87346	1	32	4	1	1	1.38	3.9	72	526.222	28.4	9.5	115	71	49.1	1	0	0	0	0	0	0	0	0	0	0	0	0	0	410	9.61	9.98	1.92	3.41	1.22	9.88	5.4	123	4.81218	0	NA	NA	NA	NA	2
87353	1	30	5	2	2	4.96	24.2	66	152	0.8	13.4	112	73	25.4	0	1	0	0	0	0	0	0	0	0	0	0	0	0	2212	56.53	64.82	12.06	3.78	1.73	67.2	5.1	24.3	3.19048	79.8	NA	NA	NA	NA	0
87369	1	24	2	2	1	1.34	5.9	75	257.684	1	12.2	116	65	23.3	0	0	0	0	0	0	0	0	0	0	0	0	0	0	2248	88.82	122.31	12.33	4.5	1.68	7.78	5.3	56.2	4.02892	0	NA	NA	NA	NA	0
87376	1	40	3	0	2	4.46	20.1	71	588	0.08	12.8	112	73	23.5	0	0	0	0	0	0	0	0	0	0	0	0	0	0	1725	82.74	78.67	10.71	5.64	1.29	24.2	5.8	36	3.58352	0	NA	NA	NA	NA	0
87409	1	44	5	2	2	0.4	15.4	75	398.125	0.9	13.5	144	91	22.2	0	0	0	1	0	0	0	0	0	0	0	0	0	0	1911	70.81	74.58	11.89	6.41	1.14	45.7	5.4	40.1	3.69138	0	NA	NA	NA	NA	0
87418	1	31	4	1	2	0.27	5.6	71	617.368	62.3	9.7	122	72	28.7	0	0	0	0	0	0	0	0	0	0	0	0	0	0	1422	48.59	54.81	15.67	3.75	0.8	317	4.7	85.6	4.44969	0	NA	NA	NA	NA	0
87423	1	31	3	0	1	0.52	14.1	74	609.077	0.8	11.2	116	63	24.8	0	0	0	0	0	0	0	0	0	0	0	0	0	0	1101	106.31	41.61	8.7	3.23	1.71	34.3	4.9	35.2	3.56105	0	NA	NA	NA	NA	0
87427	1	22	2	2	2	0.74	6.1	76	452.941	1.5	13	111	53	33.6	0	1	0	1	0	0	0	0	0	0	0	0	0	0	2671	69.27	89.24	8.36	3.03	1.14	28.8	5.5	43.1	3.76352	46.2	NA	NA	NA	NA	0
87436	1	36	1	2	0	1.07	20.8	76	165.9	0.08	13.7	107	69	28.7	0	0	0	0	0	0	0	0	0	0	0	0	0	0	3033	67.75	83.67	33.86	3.83	1.4	29.6	5.1	34.6	3.54385	0	NA	NA	NA	NA	0
87447	1	37	2	2	2	4.86	14.1	75	342.474	0.08	11.7	99	59	18.1	0	0	0	0	0	0	0	0	0	0	0	0	0	0	755	28.63	25.46	5.88	5.3	1.99	60.3	5.7	23.4	3.15274	0	NA	NA	NA	NA	0
87470	1	40	5	2	2	2.11	7.5	63	550.588	33.8	13	100	53	23.1	0	0	0	0	0	0	0	0	0	0	0	0	0	0	2522	64.76	113.95	19.68	4.68	2.04	41	4.9	62.5	4.13517	0	NA	NA	NA	NA	0
87473	1	44	2	2	1	0.74	16.3	73	270	1	13.2	137	80	32.2	1	0	0	1	0	0	0	0	0	0	0	0	0	0	1816	87.81	68.18	9.27	5.33	2.2	59.1	6.6	36.8	3.6055	0	NA	NA	NA	NA	1
87480	1	31	3	0	2	3.79	7.5	67	446.25	7.9	12.9	114	76	30.9	1	0	0	1	0	0	0	0	0	0	0	0	0	0	3145	102	102.77	20.74	3.78	1.32	17.6	5.5	37.1	3.61362	0	NA	NA	NA	NA	1
87482	1	29	1	2	2	1.84	7	73	499.875	11.3	14.2	121	64	33.7	0	0	0	0	0	0	0	0	0	0	0	0	0	0	1223	99.12	41.08	13.35	3.85	1.16	28.2	5.4	59.9	4.09268	0	NA	NA	NA	NA	0
87487	1	43	1	2	2	1.74	12.7	76	396.324	2.3	14.3	123	69	30.8	0	0	1	1	0	0	0	0	0	0	0	0	0	0	3437	168.26	180.17	23.93	4.01	1.42	45.3	7.3	40.2	3.69387	0	NA	NA	NA	NA	0
87508	1	20	1	2	1	1.22	16.7	68	337.826	5.5	13.6	97	60	36.2	0	1	0	0	0	0	0	0	0	0	0	0	0	0	2165	75.85	67.44	7.54	5.79	1.09	189	5.2	21.4	3.06339	65.5	NA	NA	NA	NA	0
87510	1	29	3	0	2	3.2	24.5	72	216.774	3	12.6	115	73	22.6	0	1	0	0	0	0	0	0	0	0	0	0	0	0	1988	85.22	97.22	10.63	5.9	1.78	140	5	21.2	3.054	1.6	NA	NA	NA	NA	0
87514	1	23	4	1	2	1.27	14.1	79	630	0.8	12.6	111	55	23.5	0	0	0	1	0	0	0	0	0	0	0	0	0	0	1911	70.81	74.58	11.89	4.27	1.29	9.72	5.6	52.2	3.95508	0	NA	NA	NA	NA	0
87516	1	43	4	1	2	0.71	5.7	76	345.391	0.4	10.2	107	67	23.8	0	0	0	0	0	0	0	0	0	0	0	0	0	0	766	51.29	36.88	1.72	4.81	1.99	5.4	5.6	100	4.60517	0	NA	NA	NA	NA	0
87520	1	39	2	2	2	3.7	9.5	76	812.308	0.5	13.8	103	69	21.3	0	0	0	0	0	0	0	0	0	0	0	0	0	0	1523	62.78	61.57	6.07	3.59	1.4	11	5.4	43.4	3.77046	0	NA	NA	NA	NA	0
87522	1	26	4	1	2	2.97	10.4	62	220.952	0.5	12.4	111	65	20.8	0	0	0	0	0	0	0	0	0	0	0	0	0	0	3206	113.96	132.89	16.23	4.47	2.12	83.6	5.2	27.6	3.31782	0	NA	NA	NA	NA	0
87539	1	31	2	2	0	1.25	28.5	78	523.6	10.9	14.1	95	72	16.6	1	0	0	0	0	0	0	0	0	0	0	0	0	0	738	8.54	19.44	2.39	4.84	1.84	83.2	5.4	30.8	3.42751	0	NA	NA	NA	NA	1
87544	1	28	5	2	2	3.77	12.7	71	1434.12	9.9	12.3	126	81	38.7	0	0	0	1	0	0	0	0	0	0	0	0	0	0	1988	71.2	121.16	12.39	4.16	1.91	224	5.4	29.5	3.38439	0	NA	NA	NA	NA	0
87555	1	31	3	0	2	1.49	14	73	392.905	3.3	14.2	113	72	41.3	0	0	0	0	0	0	0	0	0	0	0	0	0	0	2018	80.33	90.66	12.36	4.63	1.22	26	5	37.5	3.62434	0	NA	NA	NA	NA	0
87600	1	30	3	0	2	2.53	13.4	69	292.9	1.7	14	101	75	37.2	0	0	0	0	0	0	0	0	0	0	0	0	0	0	1812	35.86	61.51	10.36	4.63	1.19	119	5.2	26.7	3.28466	0	NA	NA	NA	NA	0
87632	1	38	3	0	0	2.96	29.9	67	299.217	4.5	13.9	122	72	19.8	1	0	0	0	0	0	0	0	0	0	0	0	0	0	3614	113.78	165.5	17.57	4.01	2.02	54.1	4.8	28.8	3.36038	0	NA	NA	NA	NA	1
87634	1	30	3	0	2	5	10.2	76	337.44	0.8	14.2	99	55	26.5	0	0	0	0	0	0	0	0	0	0	0	0	0	0	1442	57.37	36.09	14.4	4.84	1.5	45	4.8	41.1	3.71601	0	NA	NA	NA	NA	0
87636	1	42	4	1	2	1.23	8.2	82	355.25	21.3	11.4	130	73	43.7	0	0	0	0	0	0	0	0	0	0	0	0	0	0	1553	51.25	71.21	4.7	4.24	1.58	107	6	50	3.91202	0	NA	NA	NA	NA	0
87640	1	37	2	2	1	1.42	6.1	76	255	9.3	11.9	120	76	29.5	0	0	0	0	0	0	0	0	0	0	0	0	0	0	1215	58.15	39.23	9.22	4.27	1.03	55	5.4	70.6	4.25703	0	NA	NA	NA	NA	0
87645	1	42	3	0	0	2.67	10.9	69	812	2.9	13.7	111	69	38.8	1	0	1	0	0	0	0	0	0	0	0	0	0	0	2262	91.67	89.58	17.31	4.91	0.98	53.2	6	48.5	3.88156	0	NA	NA	NA	NA	2
87648	1	39	3	0	2	5	11.6	69	251.222	0.4	12.9	107	65	23.4	0	1	0	0	0	0	0	0	0	0	0	0	0	0	1087	33.12	40.07	2.86	5.95	2.02	17.1	5.2	57	4.04305	23.8	NA	NA	NA	NA	0
87653	1	37	2	2	0	1.23	3.9	71	296.897	0.6	11.2	122	72	27.9	0	0	0	0	0	0	0	0	0	0	0	0	0	0	1243	49.97	29.18	11.39	4.03	1.34	5.62	6	55.5	4.01638	0	NA	NA	NA	NA	0
87664	1	34	3	0	2	1.49	15.4	73	413	1.6	13.6	115	42	32.1	1	0	0	0	0	0	0	0	0	0	0	0	0	0	1435	55	71.93	7.17	5.17	2.17	54.2	5.7	31.9	3.46261	0	NA	NA	NA	NA	2
87669	1	49	4	1	2	1.39	7.5	71	291.6	1.3	12.3	115	61	43.6	0	0	1	1	0	0	0	0	0	0	0	0	0	0	2218	123.12	77.59	20.07	4.29	0.88	36.2	6.8	40.1	3.69138	0	NA	NA	NA	NA	0
87697	1	37	3	0	2	5	31.7	66	1191.82	0.2	13.2	107	68	21.2	1	1	0	0	0	0	0	0	0	0	0	0	0	0	2388	119.6	67.33	16.99	4.91	1.81	18.9	4.7	26.3	3.26957	31.8	NA	NA	NA	NA	2
87707	1	27	3	0	2	1.24	21.1	70	428.231	0.8	12.5	104	70	22	0	0	0	0	0	0	0	0	0	0	0	0	0	0	1753	94.46	85.84	13.24	4.89	1.42	23.9	5	84.5	4.43675	0	NA	NA	NA	NA	0
87711	1	46	1	2	2	4.74	16.1	73	1252	3	13.5	94	65	37	0	0	0	1	0	0	0	0	0	0	0	0	0	0	686	27.32	36.08	5.36	4.89	2.17	10.4	5.1	35.5	3.56953	0	NA	NA	NA	NA	0
87712	1	33	4	1	1	0.77	8.2	75	750.316	2.6	9	122	72	22.5	1	0	0	1	0	0	0	0	0	0	0	0	0	0	2622	87.49	92.47	13.47	3.47	1.37	10.6	5.4	64.1	4.16044	0	NA	NA	NA	NA	1
87719	1	36	3	0	2	2.46	15.9	72	571.733	0.5	13.6	113	77	28.8	0	0	0	0	0	1	1	NA	NA	NA	1	NA	NA	NA	1613	137.76	78.64	33.3	4.45	1.6	47.1	4.8	33.4	3.50856	0	38	NA	NA	NA	0
87720	1	27	4	1	1	4.39	4.1	75	463.2	32.1	12.1	120	65	28.8	0	0	0	0	0	0	0	0	0	0	0	0	0	0	2243	77.82	97.61	8.98	3.9	1.53	28.1	5.6	52.9	3.9684	0	NA	NA	NA	NA	0
87741	1	26	5	2	2	0.94	10.2	75	370.417	0.08	12.7	124	76	18.4	0	0	0	0	0	0	0	0	0	0	0	0	0	0	2057	62.1	118.12	9.87	4.73	1.91	11.9	4.5	79.4	4.3745	0	NA	NA	NA	NA	0
87742	1	41	2	2	2	1.56	17.7	79	1057.78	0.8	13.4	131	87	24.8	1	1	0	0	0	0	0	0	0	0	0	0	0	0	990	34.61	27.16	14.14	6.34	1.22	179	5.6	38.5	3.65066	8	NA	NA	NA	NA	2
87769	1	37	5	2	1	1.36	9.9	71	392.7	0.7	15.2	111	59	37.7	1	0	0	0	0	0	0	0	0	0	0	0	0	0	2657	83.25	80.6	22.3	4.32	1.29	70	5.7	36.3	3.59182	0	NA	NA	NA	NA	1
87772	1	36	1	2	0	0.48	26.1	74	271.619	5	12.5	102	63	25.1	0	0	0	0	0	0	0	0	0	0	0	0	0	0	950	72.03	20.44	14.93	4.78	1.4	33	5.4	24.2	3.18635	0	NA	NA	NA	NA	0
87788	1	44	5	2	2	5	6.8	75	335.714	0.08	12.4	139	87	21.8	0	1	0	0	0	0	0	0	0	0	0	0	0	0	2189	98.5	97.66	20.74	5.17	1.16	11.7	5.2	59.4	4.08429	8	NA	NA	NA	NA	0
87790	1	24	5	2	2	2.66	29.6	73	458.129	0.08	12.8	94	56	20.8	0	0	0	0	0	0	0	0	0	0	0	0	0	0	959	31.81	20.95	6.52	5.38	2.46	13.3	5.2	34.1	3.5293	0	NA	NA	NA	NA	0
87797	1	30	4	1	2	0.74	11.8	71	335.8	0.08	13	109	67	21.2	0	0	0	0	0	0	0	0	0	0	0	0	0	0	1413	72.38	40.44	11.12	4.16	1.63	12.6	5.5	58.4	4.06732	0	NA	NA	NA	NA	0
87799	1	48	2	2	2	4.72	16.7	71	665.647	13.6	13.5	127	67	38.5	1	0	0	0	0	0	0	0	0	0	0	0	0	0	873	32.99	29.18	4.52	6.1	1.53	15.4	5.6	48.4	3.8795	0	NA	NA	NA	NA	2
87802	1	27	4	1	2	2.02	6.8	79	551.04	28.8	13.3	131	67	52.6	0	0	0	0	0	0	0	0	0	0	0	0	0	0	1559	81.45	95.99	9.64	3.41	0.91	59.1	6.1	31.5	3.44999	0	NA	NA	NA	NA	0
87808	1	35	3	0	2	3.82	15	72	272	1	14	99	64	24.6	0	0	0	0	0	0	0	0	0	0	0	0	0	0	1828	77.84	78.57	14.14	5.53	1.68	70.3	4.7	32.8	3.49043	0	NA	NA	NA	NA	0
87814	1	20	1	2	1	2.18	20.1	70	713.652	3.7	14	111	58	21.1	0	0	0	0	0	0	0	0	0	0	0	0	0	0	1839	94.83	60.56	9	4.42	1.29	27	5.2	30.6	3.421	0	NA	NA	NA	NA	0
87821	1	20	3	0	2	0.82	24.7	70	671.333	1.8	14.2	125	73	33.2	1	0	0	0	0	0	0	0	0	0	0	0	0	0	1619	72.62	61.46	10.2	3.85	1.34	43.6	5.2	30.3	3.41115	0	NA	NA	NA	NA	2
87845	1	28	5	2	2	3.75	21.5	75	474.839	2.5	13.4	107	71	23.8	0	0	0	0	0	0	0	0	0	0	0	0	0	0	2002	63.44	100.02	13.86	4.58	1.32	29.6	5.5	30.6	3.421	0	NA	NA	NA	NA	0
87850	1	28	5	2	2	1.03	35.6	70	418.174	0.7	14.6	112	68	20.8	0	0	0	0	0	0	0	0	0	0	0	0	0	0	1588	79.29	55.59	11.02	4.99	1.66	128	5.1	24	3.17805	0	NA	NA	NA	NA	0
87852	1	48	3	0	2	5	6.6	68	248.062	0.2	10.5	104	64	24.6	0	0	0	0	0	0	0	0	0	0	0	0	0	0	1815	67.72	38.75	17.3	5.38	1.4	5.19	5.7	76.9	4.34251	0	NA	NA	NA	NA	0
87874	1	46	4	1	1	3.4	10.6	69	452.857	1.6	14.7	117	77	32.2	0	0	1	0	0	0	0	0	0	0	0	0	0	0	1520	63.78	59.87	11.81	5.64	0.72	136	11.3	28.6	3.35341	0	NA	NA	NA	NA	0
87882	1	32	3	0	2	3.4	1.3	81	1011.7	8.7	6.2	109	50	21.7	0	0	0	0	0	0	0	0	0	0	0	0	0	0	1482	65.51	56.78	5.69	2.9	1.37	1.84	5.1	231	5.44242	0	NA	NA	NA	NA	0
87891	1	42	3	0	1	0.34	28.5	77	642.059	1.3	14.4	103	61	29	1	0	0	0	0	0	0	0	0	0	0	0	0	0	1177	36.05	35.97	8.69	5.2	1.63	45.9	5.2	34.1	3.5293	0	NA	NA	NA	NA	1
87892	1	29	4	1	2	1.87	11.1	60	78.2941	0.7	13.5	136	87	32.1	1	1	0	1	0	0	0	0	0	0	0	0	0	0	3077	153.89	107.36	19.49	4.03	1.55	140	5.4	34	3.52636	46.2	NA	NA	NA	NA	1
87895	1	37	3	0	0	0.69	8.6	68	242.083	0.9	14.5	120	68	27	1	0	0	1	1	1	1	NA	NA	NA	1	NA	NA	NA	1429	15.05	28.57	2.54	3.98	1.58	49.8	5.5	35.2	3.56105	0	38	NA	NA	NA	1
87905	1	42	1	2	0	0.45	4.1	66	526.75	2.3	12.7	107	51	32.3	1	0	1	1	0	0	0	0	0	0	0	0	0	0	1021	13.76	47.32	1.97	3.36	0.8	8.42	6	55.1	4.00915	0	NA	NA	NA	NA	1
87906	1	22	4	1	2	1.62	3.8	75	258.333	17.8	11.4	103	51	30.4	0	0	0	0	0	0	0	0	0	0	0	0	0	0	2176	56.92	116.15	20.01	6.54	1.6	27.3	5.2	79.3	4.37324	0	NA	NA	NA	NA	0
87913	1	26	3	0	0	2.76	19.5	69	358.8	0.4	13.7	122	55	26.6	0	0	0	1	0	0	0	0	0	0	0	0	0	0	2446	52.41	95.65	11.43	3.98	1.45	57	5.2	20.5	3.02042	0	NA	NA	NA	NA	0
87918	1	33	2	2	2	0.84	5.7	77	574	9.8	12.9	105	59	28	0	0	0	0	0	0	0	0	0	0	0	0	0	0	2187	63.16	71.09	13.88	4.97	1.32	41.4	5.3	56.1	4.02714	0	NA	NA	NA	NA	0
87925	1	33	3	0	2	5	12	70	331.41	1.4	14.2	104	74	42.2	1	0	0	0	0	0	0	0	0	0	0	0	0	0	1911	70.81	74.58	11.89	4.94	0.93	73.2	5.4	26.1	3.26194	0	NA	NA	NA	NA	1
87939	1	36	5	2	2	5	22.7	71	740.769	0.08	14.2	105	72	18.5	0	0	0	0	0	0	0	0	0	0	0	0	0	0	1209	55.06	25.72	9.6	5.09	1.5	46.4	5.6	34.1	3.5293	0	NA	NA	NA	NA	0
87942	1	32	4	1	1	0.92	6.4	74	227.208	9.5	10.2	123	66	53.3	0	0	0	0	0	0	0	0	0	0	0	0	0	0	1071	35.48	39.68	5.55	3.13	1.47	79.5	5.9	44.1	3.78646	0	NA	NA	NA	NA	0
87957	1	48	4	1	1	2.12	9.3	73	283.652	2.2	14.2	134	77	31.2	0	0	0	0	0	0	0	0	0	0	0	0	0	0	739	49.76	18.87	3.96	4.4	1.32	83.5	5.5	40.5	3.7013	0	NA	NA	NA	NA	0
87961	1	44	2	2	0	1.48	7	74	308.286	2.1	10.7	99	65	33.2	0	0	0	0	0	0	0	0	0	0	0	0	0	0	1219	47.66	52.94	6.96	4.65	1.24	6.27	5.5	83.2	4.42125	0	NA	NA	NA	NA	0
87965	1	34	3	0	2	5	19.9	67	235.318	0.08	12.8	101	61	22.9	0	0	0	0	0	0	0	0	0	0	0	0	0	0	2432	85.88	81.92	24.08	4.14	1.55	75.1	5.3	22.1	3.09558	0	NA	NA	NA	NA	0
87969	1	38	1	2	2	5	17.4	72	790.875	11.2	14.2	106	74	35	0	0	0	0	0	0	0	0	0	0	0	0	0	0	1550	66.23	57.27	13.7	6.47	1.4	70.3	5.3	23.2	3.14415	0	NA	NA	NA	NA	0
87982	1	23	4	1	0	0.08	10.9	79	444.6	2.7	12.8	150	92	21.4	0	0	0	0	0	0	0	0	0	0	0	0	0	0	2193	122.65	96.01	10.42	3.88	1.42	41.7	5.2	60.2	4.09767	0	NA	NA	NA	NA	0
87994	1	37	4	1	2	4.58	14.3	73	637.5	0.9	13.8	103	63	27.9	0	0	0	0	0	0	0	0	0	0	0	0	0	0	1811	91.46	68.06	7.58	4.5	1.6	173	5.6	43.8	3.77963	0	NA	NA	NA	NA	0
88000	1	43	1	2	0	0.31	4.8	75	958.759	49.1	11.7	114	67	48.7	0	0	1	1	0	0	0	0	0	0	0	0	0	0	1664	84.68	54.89	8.46	4.34	1.01	35	6.8	51.1	3.93378	0	NA	NA	NA	NA	0
88005	1	21	1	2	1	0.03	6.6	64	761.684	1.4	12.4	113	69	34.7	1	0	0	0	0	0	0	0	0	0	0	0	0	0	2163	70.93	119.35	14.3	4.32	1.32	15.2	5	35.6	3.57235	0	NA	NA	NA	NA	1
88027	1	20	1	2	1	2.27	11.3	70	468.387	3	13.9	115	64	32.3	0	0	0	0	0	0	0	0	0	0	0	0	0	0	1326	31.59	60.98	3.69	3.78	1.27	31.9	5.6	31	3.43399	0	NA	NA	NA	NA	0
88047	1	29	1	2	1	1.49	21.3	63	982.588	0.8	12.6	100	59	27.6	1	0	0	0	0	0	0	0	0	0	0	0	0	0	1805	41.72	60.08	6.67	3.8	1.53	25.4	5.2	28.4	3.34639	0	NA	NA	NA	NA	1
88048	1	31	3	0	2	2.06	9.1	71	841.727	0.08	13.1	102	65	17.1	0	0	1	0	0	0	0	0	0	0	0	0	0	0	2130	52.59	100.47	16.07	4.03	1.68	15.4	5.1	40.7	3.70623	0	NA	NA	NA	NA	0
88049	1	20	3	0	2	0.85	17.7	73	669.333	16.2	12.6	117	59	38.2	0	0	0	0	0	0	0	0	0	0	0	0	0	0	1456	143.68	43.36	20.66	4.58	1.22	58.6	5.2	30.8	3.42751	0	NA	NA	NA	NA	0
88056	1	33	5	2	2	5	17	71	375	0.4	12.4	111	72	20.9	0	0	0	0	0	0	0	0	0	0	0	0	0	0	1911	70.81	74.58	11.89	5.9	1.73	72.3	5.4	24.3	3.19048	0	NA	NA	NA	NA	0
88058	1	41	1	2	1	1.3	3.2	83	375	0.7	9.8	123	73	27	0	0	0	0	0	0	0	0	0	0	0	0	0	0	1560	61.53	39.43	12.71	3.96	0.83	5.51	5.8	144	4.96981	0	NA	NA	NA	NA	0
88060	1	23	3	0	2	2.12	14.7	70	297	0.5	13	118	47	19.6	1	0	0	0	0	0	0	0	0	0	0	0	0	0	2413	62.48	82.21	22.45	3.65	1.27	43.5	5	27.7	3.32143	0	NA	NA	NA	NA	2
88065	1	26	2	2	2	3.72	7.3	76	503.522	0.6	13	108	58	20.3	0	0	0	0	0	0	0	0	0	0	0	0	0	0	2334	72.9	90.34	20.61	4.11	1.68	30	5.1	35.5	3.56953	0	NA	NA	NA	NA	0
88071	1	20	4	1	2	2.46	14.1	66	420.952	1.3	12.4	104	44	25.6	0	0	0	0	0	0	0	0	0	0	0	0	0	0	898	25.16	33.36	5.33	3.18	1.42	25.9	5.5	25.5	3.23868	0	NA	NA	NA	NA	0
88072	1	31	3	0	2	3.14	15.2	75	380.172	0.7	12.5	120	64	21.9	0	0	0	0	0	0	0	0	0	0	0	0	0	0	1350	60	37.27	8.6	4.45	1.99	76.6	5.3	25.1	3.22287	0	NA	NA	NA	NA	0
88077	1	24	4	1	2	0.94	10.7	70	336.952	1.1	13.4	123	73	32	0	0	0	1	0	0	0	0	0	0	0	0	0	0	2274	77.94	118.05	10.84	4.06	1.32	59	5.6	30	3.4012	0	NA	NA	NA	NA	0
88081	1	36	4	1	2	2.09	35.5	77	707.353	10.4	11.9	129	77	32.5	1	1	0	1	0	0	0	0	0	0	0	0	0	0	2050	61.08	71.08	14.79	5.17	0.65	17.5	6	81.8	4.40428	14	NA	NA	NA	NA	2
88082	1	44	3	0	2	3.73	8.8	65	491.029	8.6	14.5	129	75	37.7	1	0	0	0	0	1	1	NA	1	NA	NA	NA	NA	NA	3070	151.34	127.56	12.51	5.17	1.09	241	5.8	31.2	3.44042	0	15	NA	NA	NA	2
88083	1	46	4	1	2	3.43	15.6	73	385.688	13.4	12.3	119	75	52.8	0	0	0	0	0	1	NA	NA	NA	NA	NA	NA	NA	NA	1576	31.47	50.47	5.07	4.91	1.24	47	6.1	43.1	3.76352	0	25	NA	NA	NA	0
88099	1	42	2	2	1	0.55	8.8	74	716.444	2.3	13.3	112	63	31.4	0	0	0	1	0	0	0	0	0	0	0	0	0	0	933	30.21	41.96	4.69	4.14	1.29	24.9	5.3	36.7	3.60278	0	NA	NA	NA	NA	0
88110	1	32	1	2	2	1.49	15	70	548.25	0.5	14	102	64	31.2	0	0	0	0	0	0	0	0	0	0	0	0	0	0	998	65.5	41.33	5	3.78	1.11	26.7	4.6	39.1	3.66612	0	NA	NA	NA	NA	0
88116	1	41	3	0	2	5	7.7	72	533.571	0.4	13.5	95	67	24.4	1	1	0	0	0	0	0	0	0	0	0	0	0	0	2892	107.04	97	26.56	5.22	1.66	39.7	4.9	44.3	3.79098	47.7	NA	NA	NA	NA	1
88123	1	26	3	0	2	2	12.5	73	585.2	0.9	13.5	115	78	22.1	0	0	0	0	0	0	0	0	0	0	0	0	0	0	1903	98.11	61.91	12.04	3.39	1.71	42.9	5.1	21.1	3.04927	0	NA	NA	NA	NA	0
88138	1	44	2	2	2	4.42	2.5	70	598.154	1.5	9.3	114	69	35.3	0	0	0	0	0	0	0	0	0	0	0	0	0	0	2110	103.42	129.66	8.86	5.84	2.12	5.19	5.3	140	4.94164	0	NA	NA	NA	NA	0
88147	1	27	3	0	2	3.3	20.8	71	500.208	3.5	13.6	113	80	38.8	0	0	0	0	0	0	0	0	0	0	0	0	0	0	1013	55.72	25.23	5.56	5.66	1.14	89.9	5.1	32.6	3.48431	0	NA	NA	NA	NA	0
88164	1	45	2	2	2	3.52	10.6	68	298.125	1.4	13	121	70	39.3	1	0	1	1	0	0	0	0	0	0	0	0	0	0	2524	84.58	113.41	9.2	5.22	0.96	25.9	5.9	17.9	2.8848	0	NA	NA	NA	NA	1
88167	1	38	3	0	0	0.08	39.6	72	1123.6	2.4	15.4	127	89	22.9	1	1	0	1	0	0	0	0	0	0	0	0	0	0	2169	63.41	76.21	9.9	4.58	1.68	43	5.3	24.3	3.19048	44.4	NA	NA	NA	NA	1
88182	1	38	5	2	2	1.56	9.1	78	380.531	2.1	13.7	131	96	43.3	0	1	0	0	0	0	0	0	0	0	0	0	0	0	2562	56.32	138.26	8.97	7.09	1.09	20.8	5	78.6	4.36437	18.7	NA	NA	NA	NA	0
88184	1	23	3	0	1	5	11.5	71	325.515	9.2	12.3	113	69	28.4	0	0	0	0	0	0	0	0	0	0	0	0	0	0	1432	47.29	70.72	8.69	4.4	1.47	41	5.7	37.6	3.627	0	NA	NA	NA	NA	0
88185	1	42	5	2	0	1.34	6.4	73	174.545	20.7	12.7	108	68	22.5	0	0	0	0	0	0	0	0	0	0	0	0	0	0	1845	127.64	57.4	13.8	5.28	1.29	147	5.5	26.4	3.27336	0	NA	NA	NA	NA	0
88199	1	29	4	1	1	1.23	3.8	73	541.806	13	12.7	121	83	34.1	0	0	1	0	0	0	0	0	0	0	0	0	0	0	3294	60.21	164.3	18.08	5.4	1.45	22	14.4	71.5	4.2697	0	NA	NA	NA	NA	0
88205	1	23	1	2	1	0.17	11.6	68	1051.3	12.8	11.2	144	81	42.9	1	1	0	0	0	0	0	0	0	0	0	0	0	0	1804	43.02	81.2	6.95	3.78	1.47	16.8	5.1	48.4	3.8795	28.1	NA	NA	NA	NA	1
88211	1	44	4	1	1	0.56	7.9	78	664.054	52.3	12.3	108	68	48.5	1	0	0	1	1	0	0	0	0	0	0	0	0	0	1396	20.78	36.89	5.93	4.47	1.01	83.8	6.6	67.9	4.21804	0	NA	NA	NA	NA	1
88215	1	22	3	0	1	1.85	5.4	70	358.75	0.4	12.7	106	53	16.8	0	0	0	0	0	0	0	0	0	0	0	0	0	0	531	10.98	16.31	2.44	4.14	1.78	35.7	4.9	44.5	3.79549	0	NA	NA	NA	NA	0
88216	1	28	4	1	0	0.05	14.1	75	132.031	7	12.9	106	71	39.6	1	0	0	0	0	0	0	0	0	0	0	0	0	0	1884	71.04	84.98	36.11	3.39	1.34	39.9	5.4	38.9	3.66099	0	NA	NA	NA	NA	1
88230	1	42	3	0	2	3.33	20.8	65	464.382	0.8	12.7	124	65	24.9	0	0	0	1	0	0	0	0	0	0	0	0	0	0	2935	114.51	135.75	15.2	4.94	1.78	31.4	5.1	29.7	3.39115	0	NA	NA	NA	NA	0
88261	1	31	2	2	1	0.37	7	82	544.133	8.6	12.3	107	61	29.9	0	0	0	0	0	0	0	0	0	0	0	0	0	0	1116	46.45	34.41	8.89	4.63	1.47	44	6.2	41.9	3.73529	0	NA	NA	NA	NA	0
88272	1	43	3	0	2	3.51	15.6	61	224.64	3.1	14.5	124	80	28.3	1	1	0	0	0	0	0	0	0	0	0	0	0	0	2629	76.5	54.25	10.1	5.15	1.58	90.4	5.6	22.7	3.12236	67	NA	NA	NA	NA	2
88293	1	41	4	1	2	2.69	3	77	413.438	2	9.7	117	76	25.4	0	0	0	0	0	0	0	0	0	0	0	0	0	0	1852	70.31	78.62	9.32	4.34	1.6	7.9	5.3	210	5.34711	0	NA	NA	NA	NA	0
88302	1	44	4	1	2	2.79	20.1	70	354.839	0.3	13.6	127	81	30.5	0	0	1	1	0	0	0	0	0	0	0	0	0	0	1853	73.63	92.17	10.71	4.84	1.78	53	5.9	34.9	3.55249	0	NA	NA	NA	NA	0
88318	1	23	5	2	2	2.53	21.7	73	216	0.7	13.3	122	72	19.3	0	0	0	0	0	0	0	0	0	0	0	0	0	0	1516	64.18	51.8	15.65	3.75	1.58	42.7	5.1	34.7	3.54674	0	NA	NA	NA	NA	0
88332	1	23	5	2	1	0	10	77	535.8	7.1	13.5	125	81	33.4	0	0	0	0	0	0	0	0	0	0	0	0	0	0	1310	54.82	67.07	7.74	5.38	1.58	106	5.3	49.9	3.91002	0	NA	NA	NA	NA	0
88333	1	43	4	1	2	3.62	5	72	628.619	3	11.5	119	76	31.7	0	0	0	0	0	0	0	0	0	0	0	0	0	0	1743	75.05	82.96	11.53	5.64	1.34	7.08	6.1	79.5	4.37576	0	NA	NA	NA	NA	0
88334	1	39	4	1	2	1.77	5.6	80	1546.22	1.6	9.1	135	83	42.4	1	1	1	1	0	0	0	0	0	0	0	0	0	0	2026	59.87	90.5	6.36	5.79	0.85	6.16	8.3	81.7	4.40305	37	NA	NA	NA	NA	2
88336	1	28	3	0	2	3.72	10.4	75	840.086	11.7	14.9	138	81	37.1	0	0	0	1	0	0	0	0	0	0	0	0	0	0	1919	75.87	76.18	9.45	4.24	0.96	36.2	5.6	60.5	4.10264	0	NA	NA	NA	NA	0
88339	1	43	3	0	2	4.12	9.3	64	462.68	5.1	12.9	102	69	34.7	0	1	0	0	0	0	0	0	0	0	0	0	0	0	1279	49.68	30.35	16.16	4.76	1.84	19.1	5.2	41.9	3.73529	28.1	NA	NA	NA	NA	0
88348	1	26	2	2	1	1.02	10	74	415.105	2.8	12.6	106	68	37.9	0	1	0	0	0	0	0	0	0	0	0	0	0	0	2851	69.02	106.61	14.16	4.5	1.94	16.1	5	46.7	3.84374	46.8	NA	NA	NA	NA	0
88351	1	41	3	0	2	1.24	9	75	705.519	7.7	13.8	102	70	39.3	1	1	0	1	1	0	0	0	0	0	0	0	0	0	1946	32.47	25.68	4.83	4.11	1.19	68.4	5.3	25.1	3.22287	149.6	NA	NA	NA	NA	1
88352	1	27	1	2	0	0.04	13.6	76	528.5	4.8	14.9	129	73	35.2	1	1	1	0	0	0	0	0	0	0	0	0	0	0	2533	57.93	73.39	11.23	7.09	1.24	90.5	9.3	46.7	3.84374	42.1	NA	NA	NA	NA	1
88360	1	20	1	2	1	2.97	8.1	71	792.5	1.8	10.9	97	54	28.7	0	0	0	0	0	0	0	0	0	0	0	0	0	0	851	36.02	26.44	2.61	3.96	1.34	7.35	5.3	53.5	3.97968	0	NA	NA	NA	NA	0
88361	1	36	5	2	1	0.94	3.8	71	769.708	2.3	10.7	135	74	33.8	1	0	0	1	0	0	0	0	0	0	0	0	0	0	1307	53.4	36.36	8.74	5.61	0.93	6.81	6	105	4.65396	0	NA	NA	NA	NA	1
88366	1	42	1	2	0	1.22	15	70	484.842	1.7	13	117	76	28.4	0	0	0	1	0	0	0	0	0	0	0	0	0	0	1954	82.66	100.69	10.78	5.15	1.03	101	5.5	19	2.94444	0	NA	NA	NA	NA	0
88377	1	30	1	2	1	4.61	20.6	73	353.613	0.3	13.6	124	77	20.7	0	0	0	0	0	0	0	0	0	0	0	0	0	0	1911	70.81	74.58	11.89	4.76	1.4	23.1	5.3	21	3.04452	0	NA	NA	NA	NA	0
88384	1	37	3	0	2	2	13.6	68	447.37	1.8	13.4	122	69	28.7	0	0	0	0	0	0	0	0	0	0	0	0	0	0	414	9.3	9.27	3.81	4.29	1.27	22	5.3	39.3	3.67122	0	NA	NA	NA	NA	0
88386	1	38	5	2	2	5	18.4	74	589.333	1.1	13.2	98	66	21	0	0	0	0	0	0	0	0	0	0	0	0	0	0	1911	70.81	74.58	11.89	5.38	2.02	39.8	5.8	28.2	3.33932	0	NA	NA	NA	NA	0
88392	1	42	5	2	0	1.41	16.8	67	454.143	2.1	13.1	102	58	22.6	0	0	0	0	0	0	0	0	0	0	0	0	0	0	921	54.18	27.01	6.73	4.76	1.47	16.6	5.5	33.4	3.50856	0	NA	NA	NA	NA	0
88402	1	47	4	1	2	2.29	26.5	75	170.333	0.6	13.8	149	92	27.7	0	0	1	1	0	0	0	0	0	0	0	0	0	0	1670	60.36	75.33	10.26	5.17	1.47	44	6.9	45.1	3.80888	0	NA	NA	NA	NA	0
88412	1	34	4	1	2	2.19	11.1	70	262.35	1.6	13.7	103	60	21.7	0	0	0	0	0	0	0	0	0	0	0	0	0	0	2414	103.09	136.02	11.76	4.5	1.63	83.5	5	31.3	3.44362	0	NA	NA	NA	NA	0
88414	1	25	3	0	2	0.51	27	65	422.154	1.8	13.8	103	53	19.9	1	0	0	0	0	0	0	0	0	0	0	0	0	0	1652	30.41	55.74	7.01	4.14	0.88	112	4.6	21.6	3.07269	0	NA	NA	NA	NA	1
88433	1	22	3	0	1	4.54	22.7	74	702	0.6	13.7	108	65	21	0	0	0	0	0	0	0	0	0	0	0	0	0	0	2483	87.19	124.44	10.48	4.5	1.66	42.3	4.9	22.4	3.10906	0	NA	NA	NA	NA	0
88439	1	47	3	0	2	5	11.5	58	326.316	1.6	13	135	61	40.3	1	1	0	0	0	0	0	0	0	0	0	0	0	0	2129	113.56	87.72	15.92	6.34	1.27	21.6	5.5	62	4.12713	18.7	NA	NA	NA	NA	2
88440	1	39	3	0	1	2.82	2.9	69	713.143	1.5	10.2	105	60	31.7	1	0	1	0	0	0	0	0	0	0	0	0	0	0	3224	115.74	144.93	35.55	4.32	1.01	5.51	5.9	81.7	4.40305	0	NA	NA	NA	NA	2
88445	1	31	3	0	2	4.04	15.9	67	303.333	3.9	13.5	114	71	34.5	1	1	0	0	0	0	0	0	0	0	0	0	0	0	2411	70.3	51.21	10.08	4.63	1.68	46.5	5.4	20.9	3.03975	166.8	NA	NA	NA	NA	1
88451	1	34	1	2	0	0.68	8.6	78	707.571	3.7	13.2	119	70	32.8	0	0	0	0	0	0	0	0	0	0	0	0	0	0	2712	99.63	84.15	25	4.19	1.06	27.2	5.4	51.4	3.93964	0	NA	NA	NA	NA	0
88460	1	46	3	0	1	4.54	20.1	70	578.526	4.6	13.4	109	74	37.8	0	0	0	0	0	0	0	0	0	0	0	0	0	0	1594	118.17	35.89	11	3.9	1.06	47.3	5.3	25.6	3.24259	0	NA	NA	NA	NA	0
88476	1	35	3	0	0	5	19.3	76	1005.45	1	13.4	107	65	28.7	0	0	0	0	0	0	0	0	0	0	0	0	0	0	1153	58.8	33.64	17.81	5.09	1.99	75.5	5.2	25.8	3.25037	0	NA	NA	NA	NA	0
88480	1	22	5	2	2	1.15	9.7	64	650.167	7.3	12.8	133	58	55.4	0	1	0	1	0	0	0	0	0	0	0	0	0	0	2707	88.65	68.42	12.58	3.75	1.24	85.4	5.9	34.6	3.54385	69.3	NA	NA	NA	NA	0
88496	1	37	3	0	2	1.83	6.8	72	603.591	0.9	12.7	109	66	40.4	0	0	0	0	0	0	0	0	0	0	0	0	0	0	1210	27.05	49.75	3.41	4.55	1.29	31.7	5.4	41.2	3.71844	0	NA	NA	NA	NA	0
88497	1	42	3	0	2	1.44	14	73	476.636	8	13.7	115	73	42.3	0	0	0	0	0	0	0	0	0	0	0	0	0	0	1695	89.69	55.2	11.11	5.12	1.16	96.6	5.2	27.6	3.31782	0	NA	NA	NA	NA	0
88503	1	48	4	1	0	1.23	5.9	76	326.25	7.5	12.7	122	72	61.1	1	0	0	1	0	0	0	0	0	0	0	0	0	0	1911	70.81	74.58	11.89	5.12	1.71	28.2	6	55.6	4.01818	0	NA	NA	NA	NA	1
88504	1	22	3	0	0	0.66	13.4	73	642	2.7	13.7	122	61	42.6	1	0	0	0	0	0	0	0	0	0	0	0	0	0	1086	34.03	39.71	5.4	4.86	0.96	30.9	5.3	35.9	3.58074	0	NA	NA	NA	NA	1
88507	1	32	2	2	0	0.28	12	69	439.714	8.5	12.9	96	64	25.9	0	0	0	0	0	0	0	0	0	0	0	0	0	0	994	24.83	18.55	6.97	4.01	1.16	59	5.7	30.3	3.41115	0	NA	NA	NA	NA	0
88529	1	35	2	2	1	0.61	6.4	73	736.105	14.2	10.9	117	69	43.3	0	0	0	0	0	0	0	0	0	0	0	0	0	0	2158	79.18	97.01	16.5	5.79	1.99	8.75	6.1	87.2	4.4682	0	NA	NA	NA	NA	0
88530	1	49	3	0	1	3.89	16.7	73	894.562	6.3	13.9	134	72	27.5	0	0	0	0	0	0	0	0	0	0	0	0	0	0	1642	43.1	47.43	20.25	5.46	1.42	30.1	5.4	40.1	3.69138	0	NA	NA	NA	NA	0
88531	1	40	4	1	1	0.69	2.5	75	1192.94	16.2	7.2	167	92	44	0	0	0	1	0	0	0	0	0	0	0	0	0	0	2046	112.88	77.41	10.08	3.83	1.5	3.4	5.1	269	5.59471	0	NA	NA	NA	NA	0
88533	1	34	5	2	2	3.95	29.7	73	287.238	0.08	13.5	96	63	20.3	0	0	0	0	0	0	0	0	0	0	0	0	0	0	1383	90.67	41.79	7.71	4.24	2.2	77.7	5.1	25.6	3.24259	0	NA	NA	NA	NA	0
88536	1	35	4	1	2	1.01	6.1	64	536.5	3.3	10.7	127	79	49.8	0	1	1	1	0	0	0	0	0	0	0	0	0	0	814	42.14	31.17	2.81	5.95	0.93	89.9	11.5	57.2	4.04655	22.3	NA	NA	NA	NA	0
88540	1	22	3	0	0	0.53	11.1	69	426.3	1	12.7	102	62	26.4	1	0	0	0	0	0	0	0	0	0	0	0	0	0	1739	82.02	64.66	7.63	3.44	1.27	22.1	4.8	37.5	3.62434	0	NA	NA	NA	NA	1
88552	1	42	5	2	2	5	17	69	432.903	0.2	13.8	94	56	18.8	0	0	0	0	0	0	0	0	0	0	0	0	0	0	2670	120.21	127.31	9.66	4.47	1.84	47.3	5.2	32.6	3.48431	0	NA	NA	NA	NA	0
88562	1	44	4	1	2	4.32	7.7	71	428.423	1.3	13.6	113	80	28.7	0	0	0	0	0	0	0	0	0	0	0	0	0	0	2227	56.69	116	18.36	5.2	1.73	11.7	5.7	59.2	4.08092	0	NA	NA	NA	NA	0
88565	1	46	3	0	2	1.09	9.7	71	632.88	1	12.9	135	83	35.5	1	0	0	1	0	0	0	0	0	0	0	0	0	0	769	39.31	23.8	3.15	5.25	1.24	12.8	5.3	30.8	3.42751	0	NA	NA	NA	NA	1
88568	1	23	1	2	0	0.61	17.6	70	405.952	4.1	14	103	67	33.5	0	0	0	0	0	0	0	0	0	0	0	0	0	0	1692	78.36	63.52	13.06	4.01	1.16	70.4	5.2	46.5	3.83945	0	NA	NA	NA	NA	0
88570	1	29	3	0	2	5	26.3	74	587.826	2.2	15	116	66	26.1	1	0	0	0	0	0	0	0	0	0	0	0	0	0	898	24.95	14.26	7.48	4.81	1.5	102	5.2	30.4	3.41444	0	NA	NA	NA	NA	1
88572	1	34	2	2	1	2.11	9	72	611.059	1.6	13.3	113	67	29.7	0	0	0	0	0	0	0	0	0	0	0	0	0	0	1732	78.75	94.53	8.53	3.26	0.93	28.2	5.3	43.5	3.77276	0	NA	NA	NA	NA	0
88580	1	27	2	2	2	0.85	8.2	75	584	3.6	13.2	107	71	35.7	0	0	0	0	0	0	0	0	0	0	0	0	0	0	1911	70.81	74.58	11.89	3.08	1.11	26.4	5.8	54.9	4.00551	0	NA	NA	NA	NA	0
88583	1	31	4	1	2	1.67	12.9	75	243.783	4.4	13.7	115	83	39.9	0	0	0	0	0	0	0	0	0	0	0	0	0	0	1246	59.2	49.57	9.59	6.03	1.11	24.4	4.8	52.3	3.957	0	NA	NA	NA	NA	0
88589	1	37	4	1	2	3.09	3.6	75	603.72	25.3	10.6	133	93	41.7	0	0	1	0	1	0	0	0	0	0	0	0	0	0	1437	94.99	61.69	8.65	3.65	1.14	14.2	5.8	43.9	3.78191	0	NA	NA	NA	NA	0
88591	1	38	1	2	2	1.65	5.2	69	900	1	12.7	122	72	29.3	0	0	0	0	0	0	0	0	0	0	0	0	0	0	1911	70.81	74.58	11.89	4.22	1.14	5.66	5	52.2	3.95508	0	NA	NA	NA	NA	0
88605	1	37	3	0	1	2.55	6.8	80	734.862	5.7	11.9	110	68	24.2	0	0	0	0	0	0	0	0	0	0	0	0	0	0	2004	101.58	78.25	17.79	6.31	1.42	8.32	5.4	95.5	4.55913	0	NA	NA	NA	NA	0
88608	1	28	4	1	0	0.63	9.3	69	156.963	0.08	12.4	95	58	20.9	0	0	0	0	0	0	0	0	0	0	0	0	0	0	897	29.03	43.27	4.27	3.1	1.45	16.6	5	28.1	3.33577	0	NA	NA	NA	NA	0
88614	1	35	2	2	2	1.19	10.6	67	392.417	4.5	12.6	118	73	28.2	0	0	1	0	0	0	0	0	0	0	0	0	0	0	1102	84.16	35.44	8.46	4.55	1.4	80.1	5.5	38.1	3.64021	0	NA	NA	NA	NA	0
88623	1	29	2	2	1	0.31	18.1	76	125.211	0.3	11.7	105	46	20.4	0	0	0	0	0	1	NA	NA	NA	NA	NA	NA	NA	NA	1911	70.81	74.58	11.89	3.83	1.63	87.6	5.1	29.3	3.37759	0	39	NA	NA	NA	0
88625	1	33	4	1	2	2.99	9.9	71	263.391	11.2	13.3	124	73	39.2	0	0	0	1	0	0	0	0	0	0	0	0	0	0	1292	54.02	58.41	5.48	4.24	1.32	52.8	5.2	47.9	3.86912	0	NA	NA	NA	NA	0
88632	1	42	4	1	2	1.49	16.1	69	252.281	9.9	13.1	101	63	26.2	0	0	0	0	0	0	0	0	0	0	0	0	0	0	1926	71.05	74.68	13.6	4.94	1.58	88.4	5.5	29.4	3.38099	0	NA	NA	NA	NA	0
88653	1	31	1	2	2	5	15.6	70	725.143	16.7	14.1	122	73	49.9	0	1	0	0	0	0	0	0	0	0	0	0	0	0	1237	40.22	34.74	4.79	4.03	1.06	61.2	5.6	27.6	3.31782	23	NA	NA	NA	NA	0
88666	1	28	3	0	2	2.88	10.7	72	377.52	0.4	14.4	126	71	28.4	0	0	0	0	0	0	0	0	0	0	0	0	0	0	1378	50.34	59.81	10.41	3.96	1.71	21.6	4.8	60.1	4.09601	0	NA	NA	NA	NA	0
88673	1	26	5	2	2	2.11	20.8	74	522.211	0.4	14	113	42	22	0	0	0	0	0	0	0	0	0	0	0	0	0	0	1775	75.38	56.01	11.04	3.7	1.19	26.4	5	43	3.7612	0	NA	NA	NA	NA	0
88674	1	27	4	1	0	0.08	25.1	68	643.524	3.9	14.2	117	69	44.3	0	1	0	0	0	0	0	0	0	0	0	0	0	0	1136	27.75	22.31	2.49	5.53	1.45	86.2	5.8	48.3	3.87743	56.2	NA	NA	NA	NA	0
88680	1	38	4	1	2	1.92	20.4	72	178.5	0.4	13.4	117	69	20.2	1	1	0	0	0	0	0	0	0	0	0	0	0	0	2101	71.15	63.38	9.01	4.22	2.28	33.6	5.1	23.7	3.16548	43.3	NA	NA	NA	NA	1
88684	1	28	1	2	1	2.24	10	80	428.133	10.6	13.6	114	53	39.1	0	1	0	0	0	0	0	0	0	0	0	0	0	0	2161	83.64	48.45	12.78	4.6	1.47	238	5.3	34.2	3.53223	56.2	NA	NA	NA	NA	0
88696	1	47	2	2	2	5	18.8	71	490.571	4	14.3	125	81	31.7	0	0	0	1	0	0	0	0	0	0	0	0	0	0	1489	56.52	69.64	7.43	5.53	1.71	259	5.5	40.9	3.71113	0	NA	NA	NA	NA	0
88699	1	42	1	2	0	0.61	18.3	68	751.52	3.8	14.1	113	65	36.2	0	0	0	0	0	0	0	0	0	0	0	0	0	0	1673	55.08	56.72	12.31	3.52	1.4	174	5.6	24.1	3.18221	0	NA	NA	NA	NA	0
88700	1	21	1	2	1	0.25	14.9	80	594.231	8.3	14.4	101	63	36.3	0	0	0	0	0	0	0	0	0	0	0	0	0	0	1874	37.64	58.7	9.46	5.09	0.88	124	5	29.6	3.38777	0	NA	NA	NA	NA	0
88702	1	20	3	0	1	1.86	17.6	64	578.526	2.8	12.9	107	68	32.9	0	0	0	0	0	0	0	0	0	0	0	0	0	0	2365	59.91	104.17	11.59	4.22	1.16	66	5.3	22.8	3.12676	0	NA	NA	NA	NA	0
88703	1	47	4	1	2	3.55	22.4	73	703.846	1.5	13.9	120	63	27.7	1	0	0	0	0	0	0	0	0	0	0	0	0	0	2476	77.86	91.72	17.91	5.07	1.97	257	5.4	31.2	3.44042	0	NA	NA	NA	NA	2
88704	1	29	3	0	2	0.71	13.8	71	547.556	0.08	13.5	114	67	20.3	1	0	0	0	0	0	0	0	0	0	0	0	0	0	1911	70.81	74.58	11.89	5.48	1.73	48.6	5.1	24.9	3.21487	0	NA	NA	NA	NA	2
88707	1	23	4	1	0	1.1	5.7	72	317	0.5	12.1	115	80	26.8	0	0	0	0	0	0	0	0	0	0	0	0	0	0	1229	24.54	62.47	3.55	5.09	1.6	11.4	5.6	73.3	4.29456	0	NA	NA	NA	NA	0
88708	1	49	5	2	0	0.68	25.4	72	405.588	0.3	10.6	107	67	23.6	0	0	0	0	0	0	0	0	0	0	0	0	0	0	1113	48.08	51.02	8.41	4.29	1.22	123	5.3	68.8	4.2312	0	NA	NA	NA	NA	0
88709	1	25	3	0	2	5	23.3	72	342	0.08	13.3	105	67	19.1	0	0	0	0	0	0	0	0	0	0	0	0	0	0	1363	35.08	47.72	8.73	3.96	1.42	63.6	5.1	30.3	3.41115	0	NA	NA	NA	NA	0
88720	1	28	4	1	1	1.49	19.5	72	320.385	0.2	12	114	49	22.5	0	1	0	0	0	0	0	0	0	0	0	0	0	0	2445	148.44	59.4	12.3	2.72	1.45	32.6	5.6	28.8	3.36038	9.6	NA	NA	NA	NA	0
88721	1	42	4	1	2	1.76	6.3	77	419.062	4.3	11.6	115	77	38.8	0	0	1	1	0	0	0	0	0	0	0	0	0	0	1052	41.82	40.52	11.38	3.7	1.32	10.9	7.1	45.7	3.8221	0	NA	NA	NA	NA	0
88748	1	38	4	1	2	2.98	7.9	68	342.857	48.3	10.4	119	59	43.3	0	0	0	0	0	0	0	0	0	0	0	0	0	0	705	13.27	21.13	6.7	3.93	0.88	7.99	6	76.1	4.33205	0	NA	NA	NA	NA	0
88766	1	48	5	2	2	5	11.3	72	560	1.8	14.1	131	85	35.8	0	0	0	0	0	0	0	0	0	0	0	0	0	0	1310	44.72	22.64	26.11	4.71	1.42	193	5.7	43.7	3.77735	0	NA	NA	NA	NA	0
88776	1	42	1	2	0	0.84	5.7	75	1033.79	0.4	12	122	72	25.5	0	0	0	0	0	0	0	0	0	0	0	0	0	0	1911	70.81	74.58	11.89	4.32	1.68	4.86	5.9	88	4.47734	0	NA	NA	NA	NA	0
88786	1	43	4	1	1	1.19	10	64	355.464	16	13.4	154	94	42.7	1	0	0	0	0	0	0	0	0	0	0	0	0	0	1426	40.45	61.47	7.24	3.59	0.8	111	8.4	37.5	3.62434	0	NA	NA	NA	NA	1
88790	1	31	5	2	2	3.72	19.7	71	224.486	0.2	13.1	138	88	19.7	1	0	0	0	0	0	0	0	0	0	0	0	0	0	2577	47.56	114.81	13.54	4.32	1.97	83.2	5.6	17.3	2.85071	0	NA	NA	NA	NA	2
88795	1	30	1	2	0	0.54	7.5	84	329.579	2.3	11.8	111	71	29.2	0	0	0	0	0	0	0	0	0	0	0	0	0	0	791	39.85	15.95	8.42	4.5	1.5	8.32	5.4	71.4	4.2683	0	NA	NA	NA	NA	0
88799	1	21	3	0	2	1.03	14	67	291.652	0.08	14.9	117	65	17.6	1	0	0	0	0	0	0	0	0	0	0	0	0	0	1879	106.58	68.77	15.36	4.14	1.94	58.1	5.2	28	3.3322	0	NA	NA	NA	NA	2
88803	1	32	4	1	2	0.92	5.7	71	386.609	3.7	10.1	107	69	29	0	0	0	0	0	0	0	0	0	0	0	0	0	0	1899	71.34	80.59	7.85	4.86	1.37	16.1	4.8	69.4	4.23989	0	NA	NA	NA	NA	0
88816	1	47	2	2	0	1.14	2	81	906.571	3.6	8.8	138	87	29.3	0	0	0	0	0	0	0	0	0	0	0	0	0	0	1911	70.81	74.58	11.89	4.81	1.53	8.32	5.5	238	5.47227	0	NA	NA	NA	NA	0
88818	1	28	1	2	1	3.07	9.7	71	663	5.2	12.1	126	39	39	1	0	0	0	0	0	0	0	0	0	0	0	0	0	2323	66.58	127.28	11.28	5.72	1.24	17.7	5	31.9	3.46261	0	NA	NA	NA	NA	2
88829	1	41	5	2	2	5	20.8	76	333	0.4	12.3	121	78	20.1	0	0	0	0	0	0	0	0	0	0	0	0	0	0	2282	92.3	89.64	20.64	3.88	1.22	24.7	5.1	48.5	3.88156	0	NA	NA	NA	NA	0
88833	1	28	3	0	2	2.89	2.9	67	1410	20.6	10.1	127	69	40.7	0	0	0	0	0	0	0	0	0	0	0	0	0	0	1456	72.28	64.67	8.18	4.4	1.86	5.19	5.6	89.1	4.48976	0	NA	NA	NA	NA	0
88835	1	28	2	2	2	5	21.9	66	699	0.3	13.6	111	70	23.5	0	1	0	0	0	0	0	0	0	0	0	0	0	0	2884	64.35	78.27	9.25	4.4	1.99	75.1	5.2	23.2	3.14415	113	NA	NA	NA	NA	0
88840	1	20	4	1	2	5	11.5	68	311.464	6.3	13.5	117	78	33.8	0	0	0	0	0	0	0	0	0	0	0	0	0	0	3442	115.09	170.13	21.12	4.01	1.99	23.4	5.1	31.4	3.44681	0	NA	NA	NA	NA	0
88842	1	26	5	2	2	5	5.2	70	503.818	8.8	11.7	101	72	34.2	0	0	0	0	0	0	0	0	0	0	0	0	0	0	1951	42.95	84.4	16.57	5.38	0.93	33.6	5.7	51.6	3.94352	0	NA	NA	NA	NA	0
88843	1	28	1	2	0	1.23	12	77	530.2	6	13.2	114	73	25.3	0	0	0	1	0	0	0	0	0	0	0	0	0	0	2210	87.5	102.64	14.5	5.9	2.35	65.6	5.1	54	3.98898	0	NA	NA	NA	NA	0
88868	1	38	4	1	0	0.95	11.5	78	570.5	3.5	11.1	127	77	34.8	0	0	0	1	0	0	0	0	0	0	0	0	0	0	2272	87.9	111.24	14.85	4.32	1.71	9.39	6.9	41.3	3.72086	0	NA	NA	NA	NA	0
88890	1	21	3	0	0	1.83	5.2	74	556.615	10.6	13.2	102	59	45.6	1	0	0	0	0	0	0	0	0	0	0	0	0	0	3504	70.56	187.67	4.52	3.78	1.03	39	5.7	51.1	3.93378	0	NA	NA	NA	NA	1
88891	1	36	5	2	2	4.25	3.6	69	452.025	6.8	12.2	117	81	60.9	0	0	0	0	0	0	0	0	0	0	0	0	0	0	3483	129.06	122.77	21.5	3.65	1.22	24.6	6	62.8	4.13996	0	NA	NA	NA	NA	0
88892	1	27	4	1	1	2.23	4.8	73	619.037	5.7	12.1	95	52	29.8	0	0	0	1	0	0	0	0	0	0	0	0	0	0	1303	101.53	42.73	2.9	3.67	0.98	35.8	5.5	34.2	3.53223	0	NA	NA	NA	NA	0
88900	1	49	2	2	2	3.7	3	71	846	4.4	10.8	123	71	43.5	0	1	0	0	0	0	0	0	0	0	0	0	0	0	2146	66.93	73.46	10.18	5.25	1.89	7.35	5.6	102	4.62497	55.8	NA	NA	NA	NA	0
88903	1	22	3	0	2	4.04	17.2	71	509.4	2.1	13.3	107	68	16.7	0	0	0	0	0	0	0	0	0	0	0	0	0	0	1822	62.05	92.01	15.1	4.14	1.68	62.3	5.1	22.8	3.12676	0	NA	NA	NA	NA	0
88907	1	44	1	2	2	1.55	21.3	68	351.389	2.1	13.3	125	81	22.3	0	0	0	0	0	0	0	0	0	0	0	0	0	0	3249	159.48	127.23	15.83	7.76	1.4	33.8	12.4	32	3.46574	0	NA	NA	NA	NA	0
88910	1	29	4	1	2	3.62	14.7	72	360	5	14	132	55	40.8	0	1	0	0	0	0	0	0	0	0	0	0	0	0	1198	68.91	38.27	11.83	5.79	1.32	81.4	5.4	35.6	3.57235	22.3	NA	NA	NA	NA	0
88920	1	33	5	2	2	5	8.6	68	715.263	1.3	12.6	101	62	27.4	0	1	0	0	0	0	0	0	0	0	0	0	0	0	4284	135.55	202.03	27.27	5.56	1.63	75.3	5.6	26.4	3.27336	15.9	NA	NA	NA	NA	0
88932	1	38	2	2	2	1.18	10	76	265.688	2.7	12.1	120	69	29.6	1	0	0	0	0	0	0	0	0	0	0	0	0	0	2032	62.62	106.51	12.7	5.72	1.81	42.3	5.1	36.8	3.6055	0	NA	NA	NA	NA	2
88933	1	41	4	1	2	2.47	6.3	78	686.375	1.9	12.4	109	76	32	0	0	0	0	0	0	0	0	0	0	0	0	0	0	1911	70.81	74.58	11.89	4.29	1.22	30.7	5.6	55.9	4.02356	0	NA	NA	NA	NA	0
88937	1	48	4	1	2	3.29	12.5	67	247.579	2.1	12.5	131	79	34.9	0	1	0	1	0	0	0	0	0	0	0	0	0	0	2598	63.92	109.06	9.89	4.76	2.02	31.3	5.5	34	3.52636	18.5	NA	NA	NA	NA	0
88944	1	20	4	1	2	3.55	19	73	648.375	8	13.3	129	74	24.4	0	0	0	0	0	0	0	0	0	0	0	0	0	0	2350	58.92	88.65	11.83	4.16	1.63	26.9	5.2	25.7	3.24649	0	NA	NA	NA	NA	0
88949	1	38	2	2	2	4.04	13.6	71	369.72	1.2	12.2	119	77	26.5	0	1	0	0	0	0	0	0	0	0	0	0	0	0	1143	54.63	37.12	7	5.48	1.11	171	5.4	28	3.3322	13.4	NA	NA	NA	NA	0
88950	1	43	5	2	2	5	4.8	70	289.333	0.3	12.6	122	72	22.8	0	1	0	0	0	0	0	0	0	0	0	0	0	0	1939	100.59	62.24	11.76	5.28	2.35	12.8	5.3	44.7	3.79997	19	NA	NA	NA	NA	0
88951	1	20	3	0	2	5	7.3	73	1002.32	0.4	14.2	105	62	23	0	0	0	0	0	0	0	0	0	0	0	0	0	0	1586	63.72	53.32	10.38	4.09	1.81	13.7	5.1	72.9	4.28909	0	NA	NA	NA	NA	0
88970	1	23	5	2	2	5	20.6	78	608	2	12.7	111	68	21.8	0	0	0	0	0	0	0	0	0	0	0	0	0	0	1342	56.77	53.84	8.67	4.53	1.19	40.1	5.1	23.6	3.16125	0	NA	NA	NA	NA	0
88976	1	46	5	2	2	0.92	16.3	70	595.652	1.8	13.7	105	65	29.5	0	0	0	0	0	0	0	0	0	0	0	0	0	0	2427	100.83	95.35	20.05	4.01	1.6	17.8	5.7	47.2	3.85439	0	NA	NA	NA	NA	0
88986	1	22	2	2	2	1.6	4.7	73	291.828	5.3	14.3	121	66	33.5	0	0	0	0	0	0	0	0	0	0	0	0	0	0	2811	88.1	132.05	21.69	3.75	1.32	66	5.4	41.7	3.7305	0	NA	NA	NA	NA	0
88992	1	27	3	0	2	4.28	17.7	72	474.696	4.8	14	110	67	43	0	1	0	0	0	0	0	0	0	0	0	0	0	0	3714	83.11	148.33	13.17	4.22	1.14	117	5.3	35	3.55535	42.1	NA	NA	NA	NA	0
89012	1	24	3	0	2	0.93	16.1	64	268.667	1.1	12.5	101	53	27.4	1	1	0	0	0	0	0	0	0	0	0	0	0	0	2811	88.43	121.04	10.54	3.47	1.53	35.8	5.3	21.7	3.07731	38.4	NA	NA	NA	NA	1
89025	1	48	5	2	0	0	27.6	70	536.64	1.3	14.8	135	80	28.9	0	0	0	1	0	0	0	0	0	0	0	0	0	0	1911	70.81	74.58	11.89	5.77	1.4	17.8	6.2	36.5	3.59731	0	NA	NA	NA	NA	0
89031	1	41	5	2	2	3.92	18.3	69	530	0.4	12.1	111	77	29.2	0	0	0	1	0	0	0	0	0	0	0	0	0	0	2321	71.59	115.85	11.31	4.45	2.02	19.9	4.9	35	3.55535	0	NA	NA	NA	NA	0
89036	1	46	3	0	2	2.39	10	70	751.091	4.1	12.9	123	69	29.5	0	0	0	0	0	0	0	0	0	0	0	0	0	0	2060	50.63	105.83	9.42	5.87	1.06	13.1	5.4	93.1	4.53367	0	NA	NA	NA	NA	0
89038	1	25	3	0	2	2.23	15.9	73	591.964	2.5	12.8	123	73	27	0	0	0	0	0	0	0	0	0	0	0	0	0	0	3351	162.56	116.75	20.16	4.5	1.63	70.2	4.8	27.7	3.32143	0	NA	NA	NA	NA	0
89041	1	48	3	0	1	2.76	15.4	71	435.864	8.4	14.2	121	87	25.3	0	0	0	0	0	0	0	0	0	0	0	0	0	0	3080	84.24	98.14	20.1	6	0.98	87.2	5.7	30.8	3.42751	0	NA	NA	NA	NA	0
89072	1	39	1	2	0	1.25	7.9	70	658.8	0.5	12.6	115	67	21.6	0	0	0	0	0	0	0	0	0	0	0	0	0	0	2128	88.52	76.41	10.73	5.22	2.02	8.21	5.7	42.2	3.74242	0	NA	NA	NA	NA	0
89076	1	37	3	0	2	1.73	9.3	74	168.48	0.08	13	95	65	19.4	1	0	0	0	0	0	0	0	0	0	0	0	0	0	1911	70.81	74.58	11.89	4.58	2.15	91	5	24.2	3.18635	0	NA	NA	NA	NA	2
89083	1	46	3	0	2	3.17	19.2	66	520.435	0.6	15.6	96	61	18.3	1	0	0	0	0	0	0	0	0	0	0	0	0	0	1502	95.54	54.67	19.95	4.73	1.86	99.6	5.6	28.1	3.33577	0	NA	NA	NA	NA	1
89106	1	44	4	1	2	3.52	12.7	80	495	7.3	12.6	124	71	42.4	0	1	0	1	0	0	0	0	0	0	0	0	0	0	2528	42.9	121.69	6.79	4.27	1.34	13.3	5.6	39.5	3.6763	54.1	NA	NA	NA	NA	0
89111	1	27	3	0	2	2.97	10	66	394	4.1	11.9	102	69	24.7	0	0	0	0	0	0	0	0	0	0	0	0	0	0	1822	57.94	65.96	13.82	3.7	1.4	10.9	5	41.5	3.72569	0	NA	NA	NA	NA	0
89146	1	42	2	2	2	1.65	14.9	73	310.944	1.6	12.6	90	62	23.5	0	1	0	0	0	1	1	1	NA	NA	NA	NA	NA	NA	1189	48.35	44.06	6.82	3.67	1.11	83	5.3	29.4	3.38099	18.5	14	NA	NA	NA	0
89152	1	20	1	2	2	0.59	9.7	76	730.074	2.1	13.3	106	69	29	0	0	0	0	0	0	0	0	0	0	0	0	0	0	1102	75.9	30.05	14.65	4.94	1.16	10	5.3	89.2	4.49088	0	NA	NA	NA	NA	0
89160	1	35	3	0	1	1.36	13.3	72	414.529	1.5	14.3	106	67	26.2	1	1	0	0	0	0	0	0	0	0	0	0	0	0	1921	37.63	33.16	3.94	6.47	1.29	16.1	5.2	57.8	4.05699	72	NA	NA	NA	NA	1
89174	1	30	5	2	2	3.25	7.2	70	686.25	3.7	13	100	67	22.3	0	1	0	0	0	0	0	0	0	0	0	0	0	0	1712	33.62	48.87	10.75	3.9	1.63	17.5	5.4	50.6	3.92395	33	NA	NA	NA	NA	0
89175	1	44	1	2	0	4.52	26.7	69	367.355	4.1	13.6	119	73	31.2	0	0	0	0	0	0	0	0	0	0	0	0	0	0	1231	44.9	44.51	4.94	5.2	1.19	63	5.3	17.9	2.8848	0	NA	NA	NA	NA	0
89183	1	24	1	2	2	0.77	8.4	66	410.154	2.7	14	125	67	48.2	1	0	0	0	0	0	0	0	0	0	0	0	0	0	1604	33.11	61.04	6.34	3.23	1.09	11.9	5.6	108	4.68213	0	NA	NA	NA	NA	2
89189	1	48	4	1	2	3.45	10.9	73	560.333	5.4	12.1	131	85	34.4	0	0	0	1	0	0	0	0	0	0	0	0	0	0	3529	133.09	109.01	21.49	3.72	1.16	78.9	5.5	50	3.91202	0	NA	NA	NA	NA	0
89197	1	47	5	2	2	4.12	7.2	68	742.5	15.9	12	148	85	30.3	0	0	0	1	0	0	0	0	0	0	0	0	0	0	1530	73.34	53.8	12.28	4.45	1.14	45.6	6	38	3.63759	0	NA	NA	NA	NA	0
89200	1	31	4	1	2	2.57	6.4	78	1029.58	24.4	13.1	122	72	35.6	0	0	0	0	0	0	0	0	0	0	0	0	0	0	1911	70.81	74.58	11.89	3.26	1.03	34.6	5.8	47.6	3.86283	0	NA	NA	NA	NA	0
89211	1	29	3	0	1	3.81	9.3	67	173	5.9	12.8	109	59	31.9	1	1	0	0	0	0	0	0	0	0	0	0	0	0	826	33.46	23.25	3.57	4.99	1.09	49	5.3	35.4	3.56671	7	NA	NA	NA	NA	1
89218	1	29	4	1	2	1.14	17	70	263.52	0.7	12.6	105	57	26.9	0	0	0	0	0	0	0	0	0	0	0	0	0	0	1911	70.81	74.58	11.89	3.72	1.27	68.4	5.6	32.5	3.48124	0	NA	NA	NA	NA	0
89223	1	43	3	0	2	3.22	5.7	72	831.455	1.9	10.5	121	64	36.6	0	1	1	0	0	0	0	0	0	0	0	0	0	0	3351	96.63	161.64	19.27	4.19	1.53	7.13	6.5	78.2	4.35927	72	NA	NA	NA	NA	0
89227	1	33	2	2	0	1.73	19.5	70	285.385	1.1	13.2	125	69	33.9	0	0	0	0	0	0	0	0	0	0	0	0	0	0	1118	41.18	55.98	7.12	6.18	2.17	63.9	5	30.1	3.40453	0	NA	NA	NA	NA	0
89230	1	31	3	0	2	2.22	24	69	549.733	5.7	15.3	121	87	35.5	0	0	0	0	0	0	0	0	0	0	0	0	0	0	1585	73.37	65.64	18.22	4.55	1.24	116	4.8	40.5	3.7013	0	NA	NA	NA	NA	0
89233	1	31	3	0	1	2.06	19.7	71	1125.48	21.1	14.6	117	81	34.6	1	0	0	0	0	0	0	0	0	0	0	0	0	0	2097	60.52	62.39	9.91	3.47	0.67	24.4	5.4	36	3.58352	0	NA	NA	NA	NA	1
89241	1	44	4	1	2	5	11.1	83	490.667	10.8	10.3	101	67	50.8	1	1	0	1	0	0	0	0	0	0	0	0	0	0	2063	42.45	51.71	11.02	5.12	1.16	87.1	6	34.1	3.5293	133.6	NA	NA	NA	NA	2
89243	1	49	4	1	2	3.72	11.6	79	124.054	2.01	11.9	113	73	34.1	0	0	0	1	0	0	0	0	0	0	0	0	0	0	3374	170.62	168.18	18.19	9.34	1.53	79.9	5.7	50.7	3.92593	0	NA	NA	NA	NA	0
89276	1	45	1	2	0	1.54	5.4	71	692.25	1.3	11.2	119	69	26.5	0	0	0	0	0	0	0	0	0	0	0	0	0	0	2336	92.78	86.1	15.81	5.61	1.19	6.27	5.5	62.4	4.13357	0	NA	NA	NA	NA	0
89278	1	25	3	0	1	5	19.7	76	636.75	3.4	13.5	113	53	32.4	0	0	0	0	0	0	0	0	0	0	0	0	0	0	1249	53.57	55.82	9.08	3.62	1.29	88.8	5	27.8	3.32504	0	NA	NA	NA	NA	0
89284	1	42	1	2	0	0.83	15.8	70	1405.07	9.4	12.9	115	65	34.5	0	0	0	0	0	0	0	0	0	0	0	0	0	0	1954	58.18	82.71	11.1	5.33	1.09	28	5.7	39.5	3.6763	0	NA	NA	NA	NA	0
89304	1	30	3	0	2	4.63	26.1	67	313.412	0.6	13.1	96	59	26.3	1	1	0	0	0	1	1	1	NA	NA	NA	NA	NA	NA	2458	117.91	77.28	13.97	4.81	1.97	42.3	5.2	39.3	3.67122	14	14	NA	NA	NA	2
89305	1	32	4	1	2	1.98	10.6	64	537.037	1.9	11.5	113	75	28	0	0	1	0	0	0	0	0	0	0	0	0	0	0	1034	55.24	42.09	3.18	3.21	1.42	20.7	5.4	19.6	2.97553	0	NA	NA	NA	NA	0
89314	1	39	4	1	2	0.91	14.3	71	254.045	2.01	13.3	126	83	36.2	0	0	1	1	0	0	0	0	0	0	0	0	0	0	1177	42	36.41	6.7	6.13	1.16	205	9.9	49.1	3.89386	0	NA	NA	NA	NA	0
89329	1	43	4	1	2	0.25	22.6	73	680	0.5	13.1	107	65	22.2	1	0	0	0	1	0	0	0	0	0	0	0	0	0	5636	154.67	252.27	22.81	5.33	2.79	137	5.1	35.9	3.58074	0	NA	NA	NA	NA	1
89340	1	24	1	2	2	1.98	11.6	65	235.4	1.2	14.2	107	75	26.1	0	0	0	0	0	0	0	0	0	0	0	0	0	0	1911	70.81	74.58	11.89	3.21	1.4	36.9	4.9	52.6	3.96272	0	NA	NA	NA	NA	0
89345	1	30	2	2	2	5	21.7	72	262.316	2.1	13.1	95	66	23	0	0	0	0	0	0	0	0	0	0	0	0	0	0	1616	74.74	56.08	14.36	5.4	2.07	53.5	5.1	34.3	3.53515	0	NA	NA	NA	NA	0
89348	1	43	4	1	2	1.41	7.2	73	405.176	0.6	11.7	135	83	26.9	0	1	0	1	0	0	0	0	0	0	0	0	0	0	2995	60.31	145.34	9.94	4.37	2.17	8.86	5.3	38.2	3.64284	18.5	NA	NA	NA	NA	0
89359	1	30	3	0	2	0.86	12.5	75	503.294	1.1	14.2	115	75	29.8	0	0	0	0	0	0	0	0	0	0	0	0	0	0	1490	44.27	75.89	6.33	3.49	1.27	56.7	5.5	29.6	3.38777	0	NA	NA	NA	NA	0
89362	1	41	3	0	2	5	9.1	66	414.375	18.8	13.8	121	73	46.8	0	0	0	0	0	0	0	0	0	0	0	0	0	0	2455	81.58	98.82	15.45	4.71	1.53	38.4	5.8	26.8	3.2884	0	NA	NA	NA	NA	0
89364	1	23	4	1	1	5	8.8	71	358.545	1.3	12.9	101	63	28.2	0	0	0	0	0	0	0	0	0	0	0	0	0	0	1369	54.98	46.44	10.74	3.59	1.34	17.5	4.7	71.9	4.27528	0	NA	NA	NA	NA	0
89399	1	30	5	2	2	5	14.5	75	463.529	0.5	13.8	92	71	24	0	0	0	0	0	0	0	0	0	0	0	0	0	0	2156	127.67	72.84	13.25	5.56	2.35	52.3	5.3	38	3.63759	0	NA	NA	NA	NA	0
89407	1	32	5	2	2	2.47	11.3	79	613.905	2.2	11.3	111	61	18.7	0	0	0	0	0	0	0	0	0	0	0	0	0	0	1020	38.38	27.4	8.48	2.61	0.98	178	5.5	40.6	3.70377	0	NA	NA	NA	NA	0
89417	1	48	5	2	1	1.85	6.4	69	300.971	2	12.3	127	79	25.8	0	0	1	0	0	0	0	0	0	0	0	0	0	0	1032	25.42	40.79	5.63	5.35	1.73	18.5	6.6	62.4	4.13357	0	NA	NA	NA	NA	0
89434	1	46	5	2	2	2.02	8.4	71	560	0.08	14.6	109	66	23.8	1	0	0	0	0	0	0	0	0	0	0	0	0	0	1177	43.98	33.16	12.7	5.33	2.4	96.8	5.2	36.7	3.60278	0	NA	NA	NA	NA	1
89435	1	46	3	0	2	1.42	4.8	71	658.304	0.9	10.9	106	61	28.7	0	1	0	0	0	0	0	0	0	0	0	0	0	0	2015	105.48	86.73	13.48	4.11	1.45	5.3	5.2	98.4	4.58904	7.7	NA	NA	NA	NA	0
89444	1	48	1	2	0	0.52	24.7	75	487.9	1.8	15.4	130	72	31.1	0	0	0	0	0	0	0	0	0	0	0	0	0	0	730	75.53	27.88	1.65	5.3	2.15	396	5.7	24.8	3.21084	0	NA	NA	NA	NA	0
89453	1	25	3	0	1	2.19	5.6	69	928.941	7.5	13.5	121	68	35.5	1	0	0	0	0	0	0	0	0	0	0	0	0	0	1769	50.44	80.4	8.48	4.03	1.03	23.1	5.2	41.9	3.73529	0	NA	NA	NA	NA	2
89457	1	48	3	0	2	5	17.9	78	598.5	0.4	12.5	119	70	22.4	0	0	0	0	0	0	0	0	0	0	0	0	0	0	2335	113.92	80.25	14.08	4.91	1.6	43.5	5.1	35.3	3.56388	0	NA	NA	NA	NA	0
89470	1	46	4	1	2	3.36	5.6	68	281.667	0.08	11.7	117	70	21.4	1	0	0	0	0	0	0	0	0	0	0	0	0	0	1598	53.33	46.53	9.26	4.14	1.4	13.6	4.9	51	3.93183	0	NA	NA	NA	NA	2
89474	1	29	3	0	2	4.71	8.6	71	565.368	14.3	13.3	108	66	41.1	0	0	0	0	0	0	0	0	0	0	0	0	0	0	1026	45.56	34.98	7.91	5.77	1.63	125	5.5	39.4	3.67377	0	NA	NA	NA	NA	0
89475	1	46	4	1	2	2.18	10.9	66	327.273	7.6	12.9	89	58	26.2	0	0	0	0	0	0	0	0	0	0	0	0	0	0	1438	58.05	63.15	6.79	5.46	1.53	27.8	5.4	40	3.68888	0	NA	NA	NA	NA	0
89476	1	44	4	1	2	2.1	3.9	78	726.706	5.9	10.3	107	77	40.5	0	0	0	0	0	0	0	0	0	0	0	0	0	0	1392	20.56	76.56	2.98	4.65	1.63	7.02	5.9	110	4.70048	0	NA	NA	NA	NA	0
89494	1	42	5	2	2	3.29	13.1	72	589.913	12.3	13.5	117	79	29.4	0	0	0	0	0	0	0	0	0	0	0	0	0	0	1843	49.97	45.6	38.63	5.07	0.93	176	5.4	43.8	3.77963	0	NA	NA	NA	NA	0
89495	1	49	4	1	0	0.6	4.8	68	119	10	12.3	132	67	36.3	1	0	0	1	0	0	0	0	0	0	0	0	0	0	2469	114.3	120.12	16.03	4.91	1.22	95.8	5.9	54.8	4.00369	0	NA	NA	NA	NA	1
89496	1	48	5	2	2	1.03	19.2	67	707.368	0.3	13.3	119	65	21.1	0	0	0	0	0	0	0	0	0	0	0	0	0	0	1911	70.81	74.58	11.89	4.27	1.37	44.9	5.6	21.2	3.054	0	NA	NA	NA	NA	0
89511	1	45	3	0	2	0.97	14.3	70	419.621	2.9	14.5	109	72	37.2	1	0	0	0	0	1	NA	NA	NA	NA	NA	NA	NA	NA	1486	81.16	48.13	6.13	5.07	1.4	60.9	5.7	29.7	3.39115	0	32	NA	NA	NA	1
89523	1	26	5	2	1	2.47	14.9	77	363	0.3	13.9	108	69	19.9	0	0	0	0	0	0	0	0	0	0	0	0	0	0	1911	70.81	74.58	11.89	4.32	1.78	14.9	5	39.2	3.66868	0	NA	NA	NA	NA	0
89529	1	20	2	2	2	1.56	9	77	1081.12	0.3	12.3	103	63	27.2	0	0	0	0	0	0	0	0	0	0	0	0	0	0	872	34.87	20.03	19.74	4.91	1.01	16.2	5.3	51.6	3.94352	0	NA	NA	NA	NA	0
89536	1	47	3	0	1	2.53	16.5	71	347.76	0.5	14.5	115	77	26.7	1	1	0	0	0	0	0	0	0	0	0	0	0	0	2156	88.79	76.55	6.03	4.42	1.81	27.5	5.3	32	3.46574	74.3	NA	NA	NA	NA	2
89545	1	41	2	2	1	0.56	5.6	70	676.667	1.3	11.7	103	59	23.7	0	0	0	0	0	0	0	0	0	0	0	0	0	0	2328	109.68	102.66	17.38	4.71	1.24	8.96	5.6	67.7	4.21509	0	NA	NA	NA	NA	0
89562	1	34	4	1	0	0.1	13.4	71	234.886	4	14.4	123	70	39	1	0	0	0	0	0	0	0	0	0	0	0	0	0	2194	16.95	27.59	4.37	4.63	1.29	54	5.1	50.2	3.91602	0	NA	NA	NA	NA	1
89575	1	25	2	2	2	1.85	9.1	71	404.25	1.2	12.6	101	71	30.8	1	1	0	0	0	0	0	0	0	0	0	0	0	0	2363	101.78	46.35	17.06	4.11	1.55	34.5	5.3	22.4	3.10906	54.5	NA	NA	NA	NA	1
89584	1	23	1	2	2	1.3	9	75	505.474	1.3	11.9	115	63	27.4	0	0	0	0	0	0	0	0	0	0	0	0	0	0	2371	111.2	64.35	17.86	3.8	1.09	10.8	5.2	50.6	3.92395	0	NA	NA	NA	NA	0
89589	1	30	5	2	2	2.53	28.8	68	610.526	0.7	13.7	101	63	21.1	1	1	0	0	0	0	0	0	0	0	0	0	0	0	2506	99.88	114.42	14.03	4.68	1.97	34.8	5	30.2	3.40784	16.2	NA	NA	NA	NA	2
89601	1	30	3	0	2	1.49	8.4	70	508.182	3	12.5	107	67	34.7	0	0	0	0	0	0	0	0	0	0	0	0	0	0	3118	135.3	130.99	32.45	3.83	1.34	18.1	5.1	43.3	3.76815	0	NA	NA	NA	NA	0
89620	1	27	5	2	1	0.68	13.6	72	575.182	3.4	14.6	112	63	35.6	1	0	0	0	0	0	0	0	0	0	0	0	0	0	3212	127.53	101.96	45.09	4.19	0.98	102	5.1	24.4	3.19458	0	NA	NA	NA	NA	2
89622	1	46	3	0	2	5	22	65	594.643	0.5	14.3	96	62	21.7	0	0	0	0	0	0	0	0	0	0	0	0	0	0	1055	51.21	41.86	4.59	5.2	1.81	80.5	5.1	43.1	3.76352	0	NA	NA	NA	NA	0
89637	1	40	1	2	0	0.11	13.4	71	394.211	1.9	13.2	96	63	27.5	0	1	0	0	0	0	0	0	0	0	0	0	0	0	1922	108.03	65.55	10.82	4.84	1.11	52.2	5.2	36.7	3.60278	11.2	NA	NA	NA	NA	0
89640	1	48	5	2	1	1.02	8.1	65	262.167	1.1	12.5	137	88	19.8	0	0	0	0	0	0	0	0	0	0	0	0	0	0	1573	83.12	55.7	9.2	4.73	1.68	23.6	5.5	29.9	3.39786	0	NA	NA	NA	NA	0
89647	1	47	3	0	2	1.36	11.8	72	933.043	18.5	13.5	119	70	35.9	1	0	0	0	0	0	0	0	0	0	0	0	0	0	1414	52.98	66.09	6.42	5.43	1.63	261	5.7	28	3.3322	0	NA	NA	NA	NA	1
89651	1	26	2	2	2	1.32	20.8	75	612.103	1.1	13.5	105	74	21.7	0	0	0	1	0	0	0	0	0	0	0	0	0	0	1420	48.84	58.58	25.68	4.58	1.47	22.2	5.5	28.7	3.3569	0	NA	NA	NA	NA	0
89659	1	43	3	0	2	5	22.2	67	274.909	0.08	14.3	98	64	22.6	0	0	0	0	0	0	0	0	0	0	0	0	0	0	1640	82.28	47.59	11.43	4.91	2.82	117	5.3	29.4	3.38099	0	NA	NA	NA	NA	0
89684	1	42	2	2	2	2.06	17.6	70	322.105	5.6	14.2	108	55	25.2	0	0	0	0	0	0	0	0	0	0	0	0	0	0	2124	101.75	66.44	9.5	4.86	1.76	129	4.9	27.3	3.30689	0	NA	NA	NA	NA	0
89685	1	41	1	2	0	2.84	11.6	70	900.706	2.7	14.8	107	63	34	1	0	0	0	0	0	0	0	0	0	0	0	0	0	2697	70.87	116.21	16.89	5.35	1.4	128	5.4	26	3.2581	0	NA	NA	NA	NA	1
89705	1	34	4	1	2	1.51	10.2	71	287.087	2.4	12.4	112	74	31.6	0	0	0	0	0	0	0	0	0	0	0	0	0	0	2182	110.23	78.35	27.41	6.18	2.02	23.2	5.5	42	3.73767	0	NA	NA	NA	NA	0
89711	1	36	3	0	2	4.54	17.4	68	307.556	4.6	14	117	75	34.4	0	0	0	0	0	0	0	0	0	0	0	0	0	0	2205	65.35	104.27	17.44	4.68	1.78	27.6	5.1	40.8	3.70868	0	NA	NA	NA	NA	0
89712	1	48	4	1	2	2.82	12	87	232.769	2.6	12.4	146	82	34.4	0	0	1	0	0	0	0	0	0	0	0	0	0	0	1629	57.79	87.52	7.37	5.53	1.01	118	7.7	20.9	3.03975	0	NA	NA	NA	NA	0
89722	1	48	4	1	2	4.12	11.1	72	592.969	10.9	13.4	130	70	37	0	0	0	1	0	1	1	NA	NA	1	NA	NA	NA	NA	1169	54.68	56.73	4.68	5.4	1.47	174	6.2	49.4	3.89995	0	28	NA	NA	NA	0
89723	1	40	4	1	2	3.09	3.8	73	847.419	11.8	10	125	75	36.5	0	0	0	0	0	0	0	0	0	0	0	0	0	0	1095	38.93	51.6	5.98	3.26	1.86	6.38	6	95.2	4.55598	0	NA	NA	NA	NA	0
89730	1	32	4	1	2	0.33	5.7	70	184.29	4.4	11.4	123	73	35.4	0	0	0	0	0	0	0	0	0	0	0	0	0	0	1731	60.87	83.01	5.62	4.91	1.09	9.5	5.9	53.1	3.97218	0	NA	NA	NA	NA	0
89743	1	41	3	0	2	5	19.5	67	382.476	0.5	13.9	109	75	22.1	0	0	0	0	0	0	0	0	0	0	0	0	0	0	2366	59.78	101.68	12.23	5.04	1.58	90.1	5.3	19.5	2.97041	0	NA	NA	NA	NA	0
89749	1	20	2	2	0	1.55	15.9	76	314.095	0.4	14.9	98	58	21.6	0	0	0	0	0	0	0	0	0	0	0	0	0	0	2100	77.52	89.04	10.85	4.6	1.06	27	5.4	44.5	3.79549	0	NA	NA	NA	NA	0
89750	1	33	1	2	1	0.9	3.4	69	713.278	1.8	10.6	99	53	28.4	0	0	0	0	0	0	0	0	0	0	0	0	0	0	1930	78.19	80.73	13.32	3.98	1.03	7.45	5.6	114	4.7362	0	NA	NA	NA	NA	0
89774	1	32	3	0	2	2.85	11.6	70	540	10	12.2	115	73	47.2	0	0	0	0	0	0	0	0	0	0	0	0	0	0	1622	79.4	78.43	9.91	4.73	1.01	72.5	4.5	64.5	4.16667	0	NA	NA	NA	NA	0
89792	1	30	1	2	2	5	29.9	69	340.241	1.1	14.4	106	56	30.4	0	0	0	0	0	0	0	0	0	0	0	0	0	0	2363	84.05	112.98	14.92	4.94	1.06	55.6	5.1	20.9	3.03975	0	NA	NA	NA	NA	0
89802	1	25	5	2	2	5	7.7	69	305	1.4	12.7	104	63	21	0	0	0	0	0	0	0	0	0	0	0	0	0	0	3498	146.95	165.05	23.09	4.68	2.53	15.1	5.3	40.4	3.69883	0	NA	NA	NA	NA	0
89805	1	26	3	0	2	2.89	14.5	73	520	0.08	13.4	114	73	22.2	1	1	0	0	0	0	0	0	0	0	0	0	0	0	2096	94.61	76.21	9.72	3.96	2.48	35.8	5	24.1	3.18221	18.6	NA	NA	NA	NA	1
89809	1	48	3	0	2	3.37	6.8	77	771.538	10.3	13	117	73	36.1	0	0	0	0	0	0	0	0	0	0	0	0	0	0	2352	76.84	116.07	5.55	5.84	1.29	96.2	5.4	54.5	3.9982	0	NA	NA	NA	NA	0
89810	1	24	4	1	1	0.6	3	80	2725.89	13.3	9.3	141	80	64.6	0	0	0	1	0	0	0	0	0	0	0	0	0	0	1138	48.56	53.41	3.71	4.4	1.5	6.15	6.2	175	5.16479	0	NA	NA	NA	NA	0
89813	1	40	3	0	2	2.26	5	73	733.389	37.9	11.6	122	67	32.3	1	0	1	1	0	1	NA	NA	NA	NA	NA	NA	NA	NA	1913	75.43	100.07	6.44	6.31	0.93	77	6.2	36.3	3.59182	0	37	NA	NA	NA	2
89816	1	26	1	2	0	0.75	7.3	72	496.571	0.9	12.3	127	71	23.5	0	0	0	0	0	0	0	0	0	0	0	0	0	0	1789	53.14	95.49	7	4.68	1.47	27.6	5.3	42.8	3.75654	0	NA	NA	NA	NA	0
89820	1	35	1	2	2	2.82	16.5	69	394.333	1.3	13.7	101	58	27.2	0	0	0	0	0	0	0	0	0	0	0	0	0	0	1864	71.65	93.21	19.97	4.68	2.15	25.7	5.1	32	3.46574	0	NA	NA	NA	NA	0
89823	1	21	3	0	2	2.76	10.4	68	265.481	11.7	14	116	69	25.6	0	0	0	0	0	0	0	0	0	0	0	0	0	0	1334	56.49	65.68	7.69	4.73	1.81	22.6	4.9	50.5	3.92197	0	NA	NA	NA	NA	0
89825	1	23	4	1	1	0.06	11.6	74	204	0.08	10.3	123	63	20.3	0	0	0	0	0	0	0	0	0	0	0	0	0	0	1999	92.05	89.57	11.2	3.7	1.68	11.3	5.8	73.6	4.29865	0	NA	NA	NA	NA	0
89829	1	39	1	2	0	0.49	8.6	62	851.143	8.4	14.8	109	73	31.7	0	0	0	1	0	0	0	0	0	0	0	0	0	0	2080	75.89	97.47	16.92	5.25	1.63	82.9	5.5	33.5	3.51155	0	NA	NA	NA	NA	0
89832	1	26	1	2	2	1.7	15.9	68	555	1	13.6	103	54	22.5	0	1	0	0	0	0	0	0	0	0	0	0	0	0	2642	161.69	104.4	13.79	3.83	1.86	30.2	5.5	36.9	3.60821	33.8	NA	NA	NA	NA	0
89833	1	36	4	1	2	1.87	8.6	72	349.958	20	12.7	117	71	43.8	1	0	0	0	0	0	0	0	0	0	0	0	0	0	1249	41.33	35.56	6.26	4.11	1.29	63.4	5.5	51.3	3.93769	0	NA	NA	NA	NA	2
89839	1	36	3	0	2	2.46	16.7	71	664.381	0.8	16	113	73	30.1	1	0	0	0	0	0	0	0	0	0	0	0	0	0	1911	70.81	74.58	11.89	4.99	1.24	57.3	5.2	29.1	3.37074	0	NA	NA	NA	NA	1
89854	1	37	1	2	2	0.02	4.5	67	898.545	8.5	10.6	106	62	32.8	0	0	0	0	0	0	0	0	0	0	0	0	0	0	3262	104.95	129.84	25.25	4.29	1.22	6.27	5.4	85.9	4.45318	0	NA	NA	NA	NA	0
89868	1	25	3	0	2	5	21.9	70	278.214	0.08	13.5	123	71	21.3	0	0	0	0	0	0	0	0	0	0	0	0	0	0	1371	64.88	52.59	6.61	4.73	2.12	118	5.3	18.1	2.89591	0	NA	NA	NA	NA	0
89886	1	38	3	0	2	4.49	14.1	71	525.76	14.6	13.7	113	76	39.7	0	1	0	0	0	0	0	0	0	0	0	0	0	0	1889	70.3	89.68	10.4	5.69	1.14	28.6	5.7	40.9	3.71113	14	NA	NA	NA	NA	0
89892	1	42	1	2	0	0.6	9.9	70	387.188	20.4	12.7	107	66	30	0	0	0	0	0	0	0	0	0	0	0	0	0	0	3302	124.31	164.11	23.82	4.45	0.85	45.2	5.5	28.4	3.34639	0	NA	NA	NA	NA	0
89901	1	36	1	2	0	1.23	7.2	74	943.158	32	13	130	82	28	0	0	0	0	0	0	0	0	0	0	0	0	0	0	1626	121.61	53.25	10.33	4.19	1.53	100	5.5	38.1	3.64021	0	NA	NA	NA	NA	0
89904	1	30	5	2	0	4	10.4	70	326.412	3.7	11.5	94	62	20.1	0	0	0	0	0	0	0	0	0	0	0	0	0	0	1422	127.77	46.93	12.7	5.02	1.66	29.9	5	30.1	3.40453	0	NA	NA	NA	NA	0
89911	1	32	2	2	2	5	9	72	694.731	20.2	12.8	109	57	37.9	0	0	0	0	0	0	0	0	0	0	0	0	0	0	2774	85.13	113.23	13.49	4.81	1.58	80.2	5.1	27.4	3.31054	0	NA	NA	NA	NA	0
89927	1	41	3	0	2	0.82	20.2	67	513.905	1.1	14.1	109	73	31.7	0	0	0	1	0	0	0	0	0	0	0	0	0	0	2620	76.63	127.33	22.39	5.12	1.11	180	5.4	22.5	3.11352	0	NA	NA	NA	NA	0
89929	1	31	4	1	2	1.02	15	70	223.594	1.2	12.7	127	77	38.1	0	0	0	0	0	0	0	0	0	0	0	0	0	0	1459	42.23	73.22	6.2	3.98	1.34	169	5.4	28.8	3.36038	0	NA	NA	NA	NA	0
89935	1	46	3	0	1	0.56	14.1	69	499.2	16.9	13.7	118	77	64.5	1	0	0	0	0	1	NA	NA	NA	NA	NA	NA	NA	NA	1699	146.21	82.16	21.67	6.59	0.91	127	7.2	33.9	3.52342	0	37	NA	NA	NA	2
89950	1	26	4	1	2	2.95	8.1	70	765.625	0.4	13.6	109	65	19.9	0	0	0	0	0	0	0	0	0	0	0	0	0	0	1821	76.15	77.13	11.23	3.65	2.2	137	5.2	42.2	3.74242	0	NA	NA	NA	NA	0
89957	1	33	5	2	1	2.66	7.9	66	756	0.9	13	114	76	28.5	0	0	0	0	0	0	0	0	0	0	0	0	0	0	1591	75.31	43.55	9.12	4.53	1.16	26.4	5.2	29.5	3.38439	0	NA	NA	NA	NA	0
89959	1	32	3	0	2	3.29	12.7	65	749.25	0.08	13.1	107	54	24.2	0	1	0	0	0	0	0	0	0	0	0	0	0	0	2224	59.39	110.76	6.23	3.23	1.63	26.3	5.1	35.2	3.56105	38	NA	NA	NA	NA	0
89970	1	47	4	1	0	0.82	5.7	73	448.68	10	13.8	134	81	29.3	1	0	0	0	0	0	0	0	0	0	0	0	0	0	1557	41.38	90.58	14.81	5.28	1.16	37	6.2	95.5	4.55913	0	NA	NA	NA	NA	1
89980	1	33	2	2	2	3.3	15.4	73	504.9	0.8	14.2	96	74	31.2	1	0	0	0	0	0	0	0	0	0	0	0	0	0	2644	90.68	101.69	19.53	4.42	1.09	45.7	5.4	25	3.21888	0	NA	NA	NA	NA	2
89981	1	46	4	1	2	1.09	18.3	77	488.7	1.4	12.5	127	73	42.5	0	0	1	1	0	0	0	0	0	0	0	0	0	0	1755	45.85	44.53	11.71	4.6	1.09	68.5	8	51.1	3.93378	0	NA	NA	NA	NA	0
89994	1	45	2	2	0	1.6	3.6	76	553.28	2.8	11.7	148	90	34.1	0	0	0	0	0	0	0	0	0	0	0	0	0	0	1531	43.56	62.9	19.66	3.41	1.09	17.6	5.6	41.5	3.72569	0	NA	NA	NA	NA	0
90020	1	33	2	2	2	0.45	21	71	1179.75	3.9	14.8	123	77	43	1	0	0	1	0	0	0	0	0	0	0	0	0	0	2372	144.08	95.5	15.86	5.02	1.32	69.6	5.7	18.6	2.92316	0	NA	NA	NA	NA	1
90028	1	43	1	2	0	0.7	18.3	76	258.75	2.7	12.9	111	75	28.6	0	0	0	0	0	0	0	0	0	0	0	0	0	0	1393	63.67	43.43	24.58	6.28	1.89	9.07	5.4	54.8	4.00369	0	NA	NA	NA	NA	0
90036	1	36	5	2	2	5	19.5	71	924	1.8	13.1	121	71	31.4	0	0	0	0	0	0	0	0	0	0	0	0	0	0	1494	72.53	48.68	11.51	6.1	1.84	11.9	5.5	52.6	3.96272	0	NA	NA	NA	NA	0
90048	1	41	5	2	2	1.27	8.6	85	426.4	0.5	12.1	114	75	28.7	0	0	0	0	0	0	0	0	0	0	0	0	0	0	1911	70.81	74.58	11.89	3.65	0.83	44.8	5.2	39.5	3.6763	0	NA	NA	NA	NA	0
90061	1	45	2	2	1	1.38	20.1	78	532.35	0.7	13.7	127	87	33.5	0	1	0	0	0	0	0	0	0	0	0	0	0	0	1168	37.73	61.01	3.51	5.59	1.6	37.1	5.4	47.6	3.86283	18.7	NA	NA	NA	NA	0
90062	1	34	4	1	0	0.93	7.9	73	822.5	1.1	13.4	135	87	38.3	1	0	0	1	0	0	0	0	0	0	0	0	0	0	2567	103.59	139.27	14.39	3.78	1.14	95.6	5.5	32.5	3.48124	0	NA	NA	NA	NA	1
90069	1	40	4	1	2	5	6.8	70	562.537	26.4	10.7	134	79	33.5	0	0	1	0	0	0	0	0	0	0	0	0	0	0	1761	47.95	63.26	7.9	4.37	1.22	28	11.9	89.7	4.49647	0	NA	NA	NA	NA	0
90093	1	24	1	2	2	1.36	6.8	75	1173.33	24.1	13.3	108	68	48.7	0	0	0	0	0	0	0	0	0	0	0	0	0	0	2446	117.21	79.06	31.1	4.78	1.22	87.1	5.8	47.7	3.86493	0	NA	NA	NA	NA	0
90111	1	36	3	0	2	1.72	2.5	63	1428	2.1	9	127	89	21.1	0	0	0	1	0	0	0	0	0	0	0	0	0	0	1833	58.43	46.91	11.8	5.22	1.45	4.65	5.5	215	5.37064	0	NA	NA	NA	NA	0
90113	1	27	4	1	2	2.8	13.4	59	579.5	2.7	13.2	119	88	39	0	0	0	0	0	0	0	0	0	0	0	0	0	0	840	44.32	17.38	12.42	6.57	1.14	32.8	11.9	57.8	4.05699	0	NA	NA	NA	NA	0
90121	1	44	3	0	2	4.41	6.8	74	737.9	10.7	13.4	135	89	45.2	0	1	0	0	0	0	0	0	0	0	0	0	0	0	3070	115.9	162.19	11.1	5.82	1.47	14.1	5.9	49.1	3.89386	18.3	NA	NA	NA	NA	0
90125	1	39	1	2	2	1.84	18.8	68	820.75	2.8	13.9	120	66	41.4	0	1	0	0	0	0	0	0	0	0	0	0	0	0	3085	84.93	141.36	15.33	5.2	1.16	34.5	5.2	24.4	3.19458	22.4	NA	NA	NA	NA	0
90146	1	34	4	1	1	0.04	14	77	441	3.9	14.4	101	66	27.6	1	0	1	0	0	0	0	0	0	0	0	0	0	0	822	20.97	22.74	3.73	5.02	1.34	95.6	7.2	64.2	4.162	0	NA	NA	NA	NA	1
90153	1	34	1	2	0	1.04	6.4	72	579.265	3.5	13.8	105	62	31.1	0	0	0	0	0	0	0	0	0	0	0	0	0	0	1976	63.16	82.88	17.57	4.34	1.34	35.6	5	34.8	3.54962	0	NA	NA	NA	NA	0
90157	1	46	3	0	1	2.53	10.4	75	628.065	14.3	13.6	135	95	34.9	1	0	0	0	0	0	0	0	0	0	0	0	0	0	1409	62.45	60.08	17.32	6.85	1.19	86.8	5.5	48.6	3.88362	0	NA	NA	NA	NA	2
90168	1	49	3	0	2	5	17.4	69	322	2.5	13.1	103	64	22.4	0	0	0	0	0	0	0	0	0	0	0	0	0	0	1851	89.92	97.26	14.98	4.73	1.63	40	5	30.8	3.42751	0	NA	NA	NA	NA	0
90184	1	36	4	1	2	0.89	13.4	70	185.182	1.9	11.6	100	65	31.1	1	0	0	1	0	0	0	0	0	0	0	0	0	0	1835	58.38	102.91	17.48	4.6	1.55	45.6	5.6	27.1	3.29953	0	NA	NA	NA	NA	1
90185	1	46	5	2	2	5	13.6	66	735	4.6	12.1	101	77	32.3	0	0	0	0	0	1	1	1	NA	NA	NA	NA	NA	NA	1838	69.3	50.35	15.1	4.09	1.42	8.61	5.8	59.2	4.08092	0	14	NA	NA	NA	0
90186	1	48	4	1	1	2.53	9.7	68	227.778	3.3	12.5	137	83	32.3	0	0	0	0	0	0	0	0	0	0	0	0	0	0	2617	112.76	131.35	13.47	4.14	1.66	132	5.1	40.2	3.69387	0	NA	NA	NA	NA	0
90189	1	23	1	2	1	1.59	18.1	72	677.6	0.4	14.8	115	68	21.1	0	0	0	1	0	0	0	0	0	0	0	0	0	0	1801	57.37	69.69	8.08	4.01	1.37	72.8	4.6	32.7	3.48738	0	NA	NA	NA	NA	0
90190	1	46	1	2	1	2.47	6.3	66	739.231	7.2	11.1	132	73	36.6	1	0	0	0	0	0	0	0	0	0	0	0	0	0	1742	83.97	61.08	8.91	3.75	1.19	9.61	5.6	66.7	4.2002	0	NA	NA	NA	NA	2
90250	1	23	5	2	2	4.63	28.8	75	400	0.6	13.9	113	66	21.7	0	0	0	0	0	0	0	0	0	0	0	0	0	0	1911	70.81	74.58	11.89	5.48	2.38	58.3	5.1	36.6	3.60005	0	NA	NA	NA	NA	0
90260	1	45	4	1	2	5	8.2	74	416.16	2.6	13.5	136	84	32.2	0	1	0	1	0	0	0	0	0	0	0	0	0	0	2593	65.74	127.6	13.73	5.64	1.53	68.6	5.4	27.4	3.31054	12.7	NA	NA	NA	NA	0
90262	1	30	2	2	2	3.17	13.4	77	231.692	1.5	14.1	115	69	25.6	0	1	0	0	0	0	0	0	0	0	0	0	0	0	1855	97.85	61.75	12.98	5.59	2.3	22	5.1	24.7	3.2068	70.4	NA	NA	NA	NA	0
90268	1	22	1	2	1	0.21	15.6	78	584	3.3	13.6	111	44	32.1	0	0	0	0	0	0	0	0	0	0	0	0	0	0	1767	67.27	80.1	11.31	3.39	1.03	38	5.4	38.6	3.65325	0	NA	NA	NA	NA	0
90281	1	46	1	2	2	0.59	17.2	72	536.148	4.3	14.3	135	79	29.6	0	1	0	0	0	0	0	0	0	0	0	0	0	0	1937	75.26	83.58	17.32	6.18	0.88	96.5	9.5	29.9	3.39786	11.2	NA	NA	NA	NA	0
90293	1	48	4	1	1	2.47	7.2	74	856.19	4.6	12.6	126	88	30	0	0	0	0	0	0	0	0	0	0	0	0	0	0	1470	36.11	58.22	5.56	5.4	1.42	19.8	7	40.9	3.71113	0	NA	NA	NA	NA	0
90295	1	48	4	1	2	3.52	9.9	69	123.75	0.3	11.9	135	81	29.3	0	0	0	1	0	0	0	0	0	0	0	0	0	0	1852	47.46	69.14	16.87	4.01	1.06	88.9	5.8	52.3	3.957	0	NA	NA	NA	NA	0
90297	1	21	4	1	2	0.63	21.1	75	122.4	0.4	12.4	99	49	22.6	1	0	0	0	0	0	0	0	0	0	0	0	0	0	2131	56.49	93.3	10.79	3.59	1.45	21.4	5.4	40.5	3.7013	0	NA	NA	NA	NA	1
90298	1	48	5	2	2	4.46	4.8	69	980.4	3.3	13.5	120	79	21.2	0	0	0	0	0	0	0	0	0	0	0	0	0	0	1559	29.19	33.02	7.74	5.02	1.81	56.1	5.4	45.7	3.8221	0	NA	NA	NA	NA	0
90307	1	42	4	1	2	5	3.9	72	382.629	31.1	11.2	111	65	44	0	0	1	1	0	1	NA	NA	NA	NA	NA	NA	NA	NA	1908	77.67	86.66	13.71	3.9	0.98	26.3	5.9	85.9	4.45318	0	37	NA	NA	NA	0
90321	1	44	4	1	2	1.39	10.9	66	96	1.4	12.5	122	72	31.2	0	0	0	0	0	0	0	0	0	0	0	0	0	0	1911	70.81	74.58	11.89	5.33	1.71	78.1	5.5	32.2	3.47197	0	NA	NA	NA	NA	0
90323	1	45	1	2	1	3.52	15.4	76	1155	3.9	14.7	98	68	30.9	0	0	0	0	0	0	0	0	0	0	0	0	0	0	1171	34.89	26.99	7.14	4.4	1.89	78.6	5	46.5	3.83945	0	NA	NA	NA	NA	0
90328	1	35	1	2	2	1.47	9.7	81	383.448	8.6	13.4	106	58	32.8	0	0	0	0	0	0	0	0	0	0	0	0	0	0	1285	45.76	43.52	10.53	6.49	0.88	64.7	5.8	31	3.43399	0	NA	NA	NA	NA	0
90354	1	43	1	2	0	1.07	13.1	68	472.5	0.9	14.2	110	70	25.9	0	0	0	0	0	0	0	0	0	0	0	0	0	0	1716	65.59	88.19	12.73	5.46	1.4	35	5.2	32.2	3.47197	0	NA	NA	NA	NA	0
90361	1	22	3	0	2	0.75	21.1	67	742.35	0.08	13.8	103	63	24.9	0	1	0	0	0	1	1	NA	1	NA	NA	NA	NA	NA	1616	60.92	61.82	10.07	4.27	2.3	85.2	5	32.9	3.49347	22.3	15	NA	NA	NA	0
90366	1	28	4	1	0	0.93	7.3	76	1340	2.9	10.6	124	79	33.9	0	0	0	1	0	0	0	0	0	0	0	0	0	0	1524	83.16	82.08	11.89	3.72	1.06	66.8	5.9	86.5	4.46014	0	NA	NA	NA	NA	0
90369	1	40	4	1	2	1.77	10.2	66	181.846	0.5	11.3	107	55	29.5	0	0	0	0	0	0	0	0	0	0	0	0	0	0	1232	53.69	40.63	10.33	4.29	1.99	32.3	5.5	43.2	3.76584	0	NA	NA	NA	NA	0
90384	1	47	3	0	2	4.48	12	67	1270	5.8	13.5	113	77	28.1	1	0	0	0	0	0	0	0	0	0	0	0	0	0	1249	52.77	45.83	11.48	6.23	0.98	42.4	5.6	31.6	3.45316	0	NA	NA	NA	NA	2
90398	1	23	3	0	2	2.51	15.9	70	620	0.3	14.3	116	47	22	0	0	0	0	0	0	0	0	0	0	0	0	0	0	1251	83.27	53.3	7.31	3.67	1.97	15.4	5.1	32.9	3.49347	0	NA	NA	NA	NA	0
90403	1	23	3	0	2	2.49	23.1	65	397.294	1.4	13.6	100	62	25.1	1	1	0	0	0	0	0	0	0	0	0	0	0	0	2143	92.26	96.91	23.69	5.84	1.89	131	5	32.5	3.48124	22.3	NA	NA	NA	NA	1
90406	1	29	2	2	0	0.5	7.2	73	529.31	2.4	11.7	93	57	27.4	0	0	0	0	0	0	0	0	0	0	0	0	0	0	1911	70.81	74.58	11.89	3.75	1.14	35.9	5.4	26.9	3.29213	0	NA	NA	NA	NA	0
90426	1	35	1	2	1	0.02	5	70	512.4	0.9	11.1	106	63	26.4	0	0	0	0	0	0	0	0	0	0	0	0	0	0	2028	95.41	96.6	10.47	5.04	1.22	4.43	5.9	78.6	4.36437	0	NA	NA	NA	NA	0
90447	1	43	3	0	0	0.3	1.8	68	495.529	4.5	7.8	125	85	22.9	1	0	0	0	0	0	0	0	0	0	0	0	0	0	2351	38.37	81.98	23.6	3.9	1.45	8.96	5.6	255	5.54126	0	NA	NA	NA	NA	1
90454	1	20	3	0	1	1.04	14.9	71	462	2.4	13.7	111	64	32	1	0	0	0	0	0	0	0	0	0	0	0	0	0	1348	34.71	44.92	3.79	3.65	0.96	54.9	5	35.4	3.56671	0	NA	NA	NA	NA	1
90463	1	44	3	0	2	1.1	7.9	67	1129.33	4.6	12.8	101	57	18.9	1	0	0	1	0	0	0	0	0	0	0	0	0	0	2029	63.61	72.88	11.66	6.05	1.58	8.96	5.5	51.1	3.93378	0	NA	NA	NA	NA	1
90470	1	44	1	2	1	2.33	5	67	726.379	14.4	12	131	85	41.8	0	0	0	0	0	0	0	0	0	0	0	0	0	0	1527	69.74	19.91	25.72	6.21	1.16	31.6	6.1	47.4	3.85862	0	NA	NA	NA	NA	0
90494	1	37	2	2	0	0.58	13.1	74	448.636	1.2	13.7	112	67	27.7	0	0	0	0	0	0	0	0	0	0	0	0	0	0	2216	113.51	63.67	12.44	3.96	1.01	83.3	5.9	23	3.13549	0	NA	NA	NA	NA	0
90515	1	27	5	2	2	2.95	13.3	74	351.964	3.1	13	124	82	33.6	0	1	0	0	0	0	0	0	0	0	0	0	0	0	1345	69.6	26.03	7.36	3.93	0.85	57.6	5.4	41.7	3.7305	35	NA	NA	NA	NA	0
90516	1	28	2	2	1	3.7	10.9	69	293.8	2.4	12.3	110	73	29.1	0	0	0	0	0	0	0	0	0	0	0	0	0	0	2460	102.07	107.84	13.18	5.74	2.74	67.9	4.8	35.2	3.56105	0	NA	NA	NA	NA	0
90527	1	38	5	2	0	2.88	27.6	67	325.652	0.08	13.9	99	71	19.5	0	0	0	1	1	0	0	0	0	0	0	0	0	0	1802	102.62	63.85	11.31	4.84	1.29	16.3	5.1	41.9	3.73529	0	NA	NA	NA	NA	0
90528	1	40	3	0	2	1.65	14.9	76	442.037	6	15.2	110	66	38.8	1	0	0	0	0	0	0	0	0	0	0	0	0	0	649	21.63	34.47	5.31	5.04	1.5	72.6	5	39.3	3.67122	0	NA	NA	NA	NA	1
90531	1	24	4	1	2	0.95	15.2	77	262.037	0.08	11.9	105	61	20	0	0	0	0	0	0	0	0	0	0	0	0	0	0	1747	64.31	74.8	19.12	5.3	2.04	23.2	4.9	55.2	4.01096	0	NA	NA	NA	NA	0
90532	1	27	4	1	2	3.25	9.1	70	245.333	0.08	12.3	99	69	22.1	0	0	0	0	0	0	0	0	0	0	0	0	0	0	2495	182.7	85.65	18.36	5.69	1.81	20.6	5.2	38.1	3.64021	0	NA	NA	NA	NA	0
90533	1	34	4	1	2	0.51	3.9	72	365.167	2.9	10.2	131	71	37.3	0	0	0	1	0	0	0	0	0	0	0	0	0	0	2397	113.61	132.13	8.08	3.41	1.16	6.59	5.4	64.8	4.17131	0	NA	NA	NA	NA	0
90540	1	24	1	2	0	1.41	18.1	71	158.897	1.9	13.6	108	50	25	0	0	0	0	0	0	0	0	0	0	0	0	0	0	1774	38.67	61.29	6.81	3.88	0.98	88.7	5.4	25.7	3.24649	0	NA	NA	NA	NA	0
90542	1	47	4	1	2	5	17.4	63	507.643	0.4	11.8	131	80	25.6	0	0	0	1	0	0	0	0	0	0	0	0	0	0	1590	73.08	68.23	8.33	4.94	1.55	10.4	5.5	34	3.52636	0	NA	NA	NA	NA	0
90544	1	28	1	2	0	3.14	10.7	76	477.231	4.4	13.1	114	69	31.9	0	0	0	0	0	0	0	0	0	0	0	0	0	0	1018	44.81	29.46	9.97	4.91	1.29	38.3	5.8	23.8	3.16969	0	NA	NA	NA	NA	0
90547	1	28	1	2	0	0.61	19.2	70	831.182	1.8	14	114	71	33.5	0	0	0	0	0	0	0	0	0	0	0	0	0	0	815	37.07	10.1	2.25	5.64	1.68	55	5.6	44.7	3.79997	0	NA	NA	NA	NA	0
90551	1	40	1	2	2	1.23	8.4	70	458.654	10.7	12.5	117	73	28.4	0	0	0	1	0	0	0	0	0	0	0	0	0	0	4484	115.81	216.85	22.31	4.73	1.19	13.5	5.2	57.2	4.04655	0	NA	NA	NA	NA	0
90569	1	36	1	2	1	0.78	14.7	77	1109.5	19.1	13.3	155	99	42.1	0	0	0	1	0	0	0	0	0	0	0	0	0	0	2691	133.54	107.7	19.18	4.78	1.37	80.8	5.4	35.5	3.56953	0	NA	NA	NA	NA	0
90573	1	34	1	2	1	1.23	22.6	70	368.667	0.6	15.1	98	61	26.9	1	0	0	0	0	0	0	0	0	0	0	0	0	0	3096	67.53	192	13.65	5.07	1.5	96.9	5	29	3.3673	0	NA	NA	NA	NA	2
90576	1	34	3	0	1	2.67	38.1	69	745.846	0.3	13.9	122	75	23.2	1	0	0	0	0	0	0	0	0	0	0	0	0	0	889	46.89	29.64	5.59	4.27	1.71	84.2	5.1	24	3.17805	0	NA	NA	NA	NA	2
90586	1	24	4	1	2	1.28	13.4	68	518.958	8.5	13	119	61	47.8	0	0	0	0	0	0	0	0	0	0	0	0	0	0	1825	102.41	104.36	13.49	4.78	1.86	44.8	5.3	38.7	3.65584	0	NA	NA	NA	NA	0
90588	1	35	1	2	0	0.57	10.6	66	593.455	1.4	12	93	58	33.8	0	1	0	0	0	0	0	0	0	0	0	0	0	0	3835	132.2	118.72	29.04	4.76	1.45	11.4	5.4	22.1	3.09558	11.2	NA	NA	NA	NA	0
90593	1	49	4	1	2	1.94	11.1	70	361.143	18.5	11.6	141	90	43.3	0	0	0	0	0	0	0	0	0	0	0	0	0	0	1892	57.03	47.17	9.49	5.38	1.66	78.4	6.1	33.7	3.5175	0	NA	NA	NA	NA	0
90599	1	40	5	2	0	1.24	10.4	82	326.059	0.3	14.5	109	77	19.5	0	0	0	0	0	0	0	0	0	0	0	0	0	0	1911	70.81	74.58	11.89	5.56	1.68	146	4.7	82	4.40672	0	NA	NA	NA	NA	0
90608	1	27	3	0	2	5	19.9	77	549.391	2.3	13.8	123	83	22.5	0	0	0	0	0	0	0	0	0	0	0	0	0	0	1410	58.83	57.78	9.26	4.65	1.97	54.8	5.3	23.8	3.16969	0	NA	NA	NA	NA	0
90609	1	49	3	0	2	5	5.6	68	926.75	22.3	11.8	131	84	28.6	0	0	0	0	0	0	0	0	0	0	0	0	0	0	1013	18.92	41.2	8.56	4.81	1.16	78.1	5.5	38.2	3.64284	0	NA	NA	NA	NA	0
90610	1	43	4	1	2	3.72	13.3	69	612.267	1.4	12.5	118	79	27.7	1	0	0	0	0	0	0	0	0	0	0	0	0	0	3270	100.78	108.53	24.56	4.01	1.53	64.4	5.5	31.5	3.44999	0	NA	NA	NA	NA	2
90618	1	34	5	2	2	5	24.4	74	569.25	0.6	13.3	108	63	23.2	0	0	0	0	0	0	0	0	0	0	0	0	0	0	2719	66.92	61.27	23.39	4.14	1.55	26.1	4.9	35.4	3.56671	0	NA	NA	NA	NA	0
90627	1	44	3	0	2	5	19.9	68	879.158	7.4	13.3	109	59	22.6	0	0	0	0	0	0	0	0	0	0	0	0	0	0	390	26.22	16.76	4.23	5.04	2.17	46.3	5.7	15.8	2.76001	0	NA	NA	NA	NA	0
90633	1	42	1	2	2	0.89	18.1	68	559.731	7.7	14.8	115	77	49.5	0	0	0	0	0	0	0	0	0	0	0	0	0	0	2593	111.58	121.71	18.41	4.73	1.01	150	5.6	21.7	3.07731	0	NA	NA	NA	NA	0
90640	1	41	3	0	2	1.86	5.2	72	325.688	0.9	13.4	98	71	32.7	0	0	0	0	0	0	0	0	0	0	0	0	0	0	1037	98.82	54.02	23.62	3.41	1.34	90.9	5.1	33.5	3.51155	0	NA	NA	NA	NA	0
90642	1	42	4	1	0	1.48	10.9	78	211.556	1.4	10.6	118	77	19.6	0	0	0	0	0	0	0	0	0	0	0	0	0	0	1667	70.97	59.94	9.1	4.37	1.42	8.75	5.6	91.7	4.51852	0	NA	NA	NA	NA	0
90651	1	44	5	2	2	5	17	70	156.296	0.08	13.9	109	72	24.6	0	0	0	0	0	0	0	0	0	0	0	0	0	0	1764	66	73.34	15.02	6	2.82	69.8	5.5	26	3.2581	0	NA	NA	NA	NA	0
90670	1	34	3	0	2	0.42	18.6	68	332.229	0.5	14.4	117	63	25.3	1	0	0	0	0	0	0	0	0	0	0	0	0	0	1018	110.43	38.18	15.71	3.78	1.37	41.5	5.3	33.6	3.51453	0	NA	NA	NA	NA	1
90692	1	30	3	0	1	0.82	9.5	53	352.8	7.3	12.3	122	67	29.5	0	0	0	0	0	0	0	0	0	0	0	0	0	0	973	18.45	31.24	2.93	3	0.83	37.2	4.8	39.1	3.66612	0	NA	NA	NA	NA	0
90700	1	40	4	1	2	2.28	4.8	73	1005.87	25.3	12.4	150	82	35.2	0	0	1	0	0	0	0	0	0	0	0	0	0	0	1456	55.38	39.11	8.81	5.56	1.55	29.3	10.7	127	4.84419	0	NA	NA	NA	NA	0
90718	1	31	5	2	2	3.73	4.1	76	1089.4	4.7	13	106	75	28.4	0	0	0	0	0	0	0	0	0	0	0	0	0	0	597	37.38	24.68	1.31	4.65	1.29	24.1	5.1	63	4.14313	0	NA	NA	NA	NA	0
90720	1	44	2	2	2	4.78	16.7	78	301.5	2.1	14.7	133	79	31.3	0	0	0	1	0	0	0	0	0	0	0	0	0	0	2010	84.33	77.42	11.51	5.77	1.11	92.9	5.5	57.5	4.05178	0	NA	NA	NA	NA	0
90721	1	43	5	2	2	2.97	10.7	75	882.5	0.08	15.4	149	85	29.1	0	0	0	0	0	0	0	0	0	0	0	0	0	0	2052	178.32	94.03	18.07	3.31	1.22	49.5	5.4	32.3	3.47507	0	NA	NA	NA	NA	0
90726	1	32	5	2	2	2.16	13.8	75	384.818	0.08	12.4	100	62	21.1	1	1	0	0	0	0	0	0	0	0	0	0	0	0	1632	55.4	69	8.94	5.02	2.12	52.6	5.3	40.4	3.69883	15.5	NA	NA	NA	NA	2
90742	1	27	5	2	2	5	27.2	71	212	0.3	14.2	108	59	17.9	0	0	0	0	0	0	0	0	0	0	0	0	0	0	1503	60.27	79.04	6.89	5.15	1.76	30.9	5.2	31.9	3.46261	0	NA	NA	NA	NA	0
90744	1	20	3	0	2	1.99	6.8	65	473.364	2.3	13.4	110	56	29	0	0	0	0	0	0	0	0	0	0	0	0	0	0	1866	86.35	88.29	11.15	4.24	1.03	32.3	5.1	37.3	3.61899	0	NA	NA	NA	NA	0
90745	1	32	3	0	2	3.99	10.7	72	604.645	26.1	14.5	153	97	46.2	1	0	1	0	0	0	0	0	0	0	0	0	0	0	5789	221.39	209.1	20.58	4.47	1.22	29	6.9	38.4	3.64806	0	NA	NA	NA	NA	2
90746	1	35	2	2	2	5	21.7	65	660.4	3.3	13.5	113	62	26	0	0	0	0	0	0	0	0	0	0	0	0	0	0	2756	91.81	114.63	14.48	4.89	1.03	27.5	5.5	25.1	3.22287	0	NA	NA	NA	NA	0
90755	1	39	4	1	2	1.86	10.4	73	144	2	14.7	119	69	29.4	0	1	0	1	0	0	0	0	0	0	0	0	0	0	961	25.01	57.51	4.06	4.14	1.94	146	4.9	33.2	3.50255	0.6	NA	NA	NA	NA	0
90767	1	40	1	2	1	0.98	6.1	79	636.167	3	12.1	113	68	29.6	0	0	0	0	0	0	0	0	0	0	0	0	0	0	996	50.51	32.18	4.87	5.07	1.09	18.6	5.4	56.5	4.03424	0	NA	NA	NA	NA	0
90768	1	48	2	2	2	3.3	10.4	69	658.083	6.2	12.5	132	77	32.9	0	0	0	0	0	0	0	0	0	0	0	0	0	0	2223	50.91	92.07	11.89	5.64	0.88	40.5	5.7	51.7	3.94546	0	NA	NA	NA	NA	0
90794	1	33	5	2	1	0.95	24.2	78	401.4	0.3	13.7	107	57	22.7	0	0	0	0	0	0	0	0	0	0	0	0	0	0	2016	71.94	72.12	22.85	4.34	1.37	227	5.3	27.8	3.32504	0	NA	NA	NA	NA	0
90798	1	35	2	2	0	0.7	3	71	566.276	14.6	11.5	97	60	31.4	0	0	0	0	0	0	0	0	0	0	0	0	0	0	1911	70.81	74.58	11.89	3.75	0.65	39.8	5.6	62	4.12713	0	NA	NA	NA	NA	0
90804	1	27	4	1	2	1.77	8.2	71	160.258	2.8	13.5	121	56	42.6	0	0	0	0	0	0	0	0	0	0	0	0	0	0	2613	62.28	100.49	15.43	5.74	1.45	16.2	5.6	43.4	3.77046	0	NA	NA	NA	NA	0
90805	1	22	4	1	1	5	10.2	76	613.8	5	12.4	114	65	40.8	0	0	0	0	0	0	0	0	0	0	0	0	0	0	2345	84.64	119.96	14.82	5.28	1.91	40	4.4	65	4.17439	0	NA	NA	NA	NA	0
90808	1	48	3	0	2	2.08	14	73	312	0.6	13.6	107	73	22.6	0	1	0	0	0	0	0	0	0	0	0	0	0	0	986	44.23	32.21	7.17	5.48	1.91	63.9	5.3	33.5	3.51155	22.3	NA	NA	NA	NA	0
90832	1	26	2	2	2	2.12	19.7	69	632.471	0.5	12.4	128	48	23	0	1	0	0	0	0	0	0	0	0	0	0	0	0	2385	81.86	79.07	17.36	3.03	1.71	38.2	5	26.4	3.27336	18.7	NA	NA	NA	NA	0
90837	1	23	4	1	0	0.01	4.8	72	199.862	0.9	10.6	105	62	28.1	0	0	0	0	0	0	0	0	0	0	0	0	0	0	656	26.73	28.06	3.57	3.75	0.88	23	5.4	46.6	3.8416	0	NA	NA	NA	NA	0
90842	1	25	3	0	2	1.61	7.7	75	448.68	0.2	13.8	112	61	33.5	0	1	0	0	0	0	0	0	0	0	0	0	0	0	1477	14.35	85.66	4.08	3.62	1.22	8.96	5	66.7	4.2002	28.8	NA	NA	NA	NA	0
90852	1	34	5	2	2	5	15	71	726	4.2	13.7	120	65	26.3	1	0	0	0	0	0	0	0	0	0	0	0	0	0	2584	101.29	103.74	33.69	5.07	0.98	139	5.5	42.4	3.74715	0	NA	NA	NA	NA	2
90856	1	42	2	2	2	2.6	9	84	627	0.7	12.8	111	71	20.6	0	0	0	0	0	0	0	0	0	0	0	0	0	0	2046	157.44	70.94	10.66	4.01	1.84	39.6	5.2	34.8	3.54962	0	NA	NA	NA	NA	0
90871	1	36	3	0	2	5	6.6	71	595.238	0.5	11.9	122	72	29	0	0	1	1	0	0	0	0	0	0	0	0	0	0	1911	70.81	74.58	11.89	4.24	2.22	9.22	6	49.4	3.89995	0	NA	NA	NA	NA	0
90873	1	46	4	1	2	5	10.9	69	632	0.9	12.9	121	67	24.2	0	0	0	1	0	0	0	0	0	0	0	0	0	0	2133	111.51	99.83	19.86	4.94	1.71	11	5.1	63	4.14313	0	NA	NA	NA	NA	0
90883	1	23	1	2	2	0.51	12.7	76	699.103	12.2	12.6	115	55	38.7	0	0	0	0	0	0	0	0	0	0	0	0	0	0	2280	53.87	117.01	11.04	4.32	1.09	75.5	5.7	24.8	3.21084	0	NA	NA	NA	NA	0
90889	1	47	3	0	2	5	10.7	78	822.25	4.1	12.9	129	81	33.9	0	0	0	1	0	0	0	0	0	0	0	0	0	0	1981	66.38	75.95	6.65	5.46	0.98	45	5.8	34.2	3.53223	0	NA	NA	NA	NA	0
90895	1	49	5	2	0	1.03	15	75	614.267	0.08	13.9	106	68	22.9	0	0	0	0	0	0	0	0	0	0	0	0	0	0	760	52.73	28.07	12.12	6.65	2.17	131	5.3	30.8	3.42751	0	NA	NA	NA	NA	0
90914	1	23	3	0	2	1.56	15.4	78	299.385	1.7	15.2	103	61	17.9	0	1	0	0	0	0	0	0	0	0	0	0	0	0	2624	65.24	66.68	13.78	4.47	1.5	41.8	5	29.9	3.39786	42.6	NA	NA	NA	NA	0
90919	1	28	1	2	0	0.18	11.8	75	624	0.5	14	116	63	25.7	0	0	0	1	0	0	0	0	0	0	0	0	0	0	4070	112.95	225.74	16.32	4.42	2.02	33.7	4.7	30.6	3.421	0	NA	NA	NA	NA	0
90931	1	35	1	2	2	2.53	6.8	69	335	1.1	12.8	139	90	37.8	1	0	0	1	1	0	0	0	0	0	0	0	0	0	2989	95.14	154.31	14.21	5.04	1.16	48.8	5.1	43.2	3.76584	0	NA	NA	NA	NA	1
90932	1	45	3	0	2	5	11.8	67	148.913	1.7	13.5	127	85	26.2	0	0	0	0	0	1	NA	NA	NA	NA	NA	NA	NA	NA	1902	61.46	66.1	24.32	5.61	2.72	46.6	5.2	29.5	3.38439	0	32	NA	NA	NA	0
90946	1	24	4	1	0	0.4	6.8	68	213.545	0.4	12.9	95	65	32.4	0	0	0	0	0	0	0	0	0	0	0	0	0	0	1911	70.81	74.58	11.89	3.8	1.91	60.2	5.1	34	3.52636	0	NA	NA	NA	NA	0
90956	1	29	4	1	2	2.95	26.3	68	200.2	0.4	13.3	122	72	26.1	0	0	0	0	0	0	0	0	0	0	0	0	0	0	1911	70.81	74.58	11.89	6.28	4.27	24.7	5.3	39.1	3.66612	0	NA	NA	NA	NA	0
90964	1	31	3	0	2	5	25.3	73	380.526	0.08	13.1	102	69	25.9	0	0	0	0	0	0	0	0	0	0	0	0	0	0	1977	82.41	66.81	15.49	5.53	1.91	25.6	5	30	3.4012	0	NA	NA	NA	NA	0
90966	1	29	4	1	2	3.25	10.9	70	338.4	2.4	12.9	122	72	23.8	0	0	0	0	0	0	0	0	0	0	0	0	0	0	2435	150.97	76.09	13.14	4.45	1.34	33.2	5.3	30.7	3.42426	0	NA	NA	NA	NA	0
90970	1	46	1	2	0	1.41	1.3	71	746.7	3.4	8.5	124	79	37.7	1	0	0	1	0	0	0	0	0	0	0	0	0	0	2302	94.55	99.3	19.29	4.53	1.24	3.35	5.7	138	4.92725	0	NA	NA	NA	NA	2
90980	1	38	4	1	1	0.52	7.5	71	346.645	12.6	13	118	87	26.2	1	0	0	0	0	0	0	0	0	0	0	0	0	0	1981	61.27	95.73	8.88	6.7	1.29	34.6	5.7	47.2	3.85439	0	NA	NA	NA	NA	1
90994	1	21	3	0	1	1.68	24	71	797.333	0.7	13.5	106	77	22.1	1	0	0	0	0	0	0	0	0	0	0	0	0	0	1800	47.14	61.04	6.74	3.52	1.42	43.9	5.2	29.3	3.37759	0	NA	NA	NA	NA	1
91008	1	27	1	2	2	1.24	16.1	73	504.643	2.8	12.9	119	60	24.6	0	0	0	0	0	0	0	0	0	0	0	0	0	0	1608	55.02	51.37	11.89	4.55	1.5	11.3	5.3	42.5	3.7495	0	NA	NA	NA	NA	0
91017	1	48	2	2	0	4.22	13.1	101	704	15.8	10.9	114	73	37.9	1	0	1	0	1	0	0	0	0	0	0	0	0	0	1014	24.29	23.56	1.03	3.39	0.59	23.4	5.9	107	4.67283	0	NA	NA	NA	NA	2
91026	1	45	4	1	2	2.56	13.8	83	240	0.08	13.3	117	72	27.3	0	1	0	0	0	0	0	0	0	0	0	0	0	0	1303	61	56.55	7.82	4.34	1.14	146	4.7	24.7	3.2068	38.2	NA	NA	NA	NA	0
91043	1	44	3	0	2	2.2	21	68	511.1	2.8	14.5	109	68	26.9	1	0	0	0	0	0	0	0	0	0	0	0	0	0	547	25	34.28	3.45	5.2	1.22	80.9	5.6	18.6	2.92316	0	NA	NA	NA	NA	1
91074	1	24	5	2	2	5	16.1	76	321.759	3.8	13.8	117	65	23.9	0	0	0	0	0	0	0	0	0	0	0	0	0	0	985	64.62	31.38	8.09	4.58	1.5	95	5.1	28.6	3.35341	0	NA	NA	NA	NA	0
91078	1	36	3	0	0	1.41	29	70	1282.67	0.5	15.7	107	71	17.7	1	1	0	1	0	0	0	0	0	0	0	0	0	0	1015	18.92	18.9	5.03	4.76	1.78	54.5	4.7	27.8	3.32504	37.2	NA	NA	NA	NA	1
91080	1	29	4	1	2	5	16.8	69	187.548	0.3	13.8	99	65	32.6	0	0	0	0	0	0	0	0	0	0	0	0	0	0	2157	121.95	45.34	14.66	4.53	1.34	31.1	5.1	43.5	3.77276	0	NA	NA	NA	NA	0
91082	1	45	1	2	0	1.76	17.4	79	596.471	1	14	187	95	27.9	0	1	0	1	0	0	0	0	0	0	0	0	0	0	2249	157.03	68.2	13.32	5.48	2.48	39.9	5.6	24.9	3.21487	33.9	NA	NA	NA	NA	0
91091	1	22	4	1	2	0.84	12.5	72	1271	5.7	13.8	108	54	44	0	0	0	1	0	0	0	0	0	0	0	0	0	0	1958	64.99	74.37	9.61	3.93	1.63	48.7	5.4	37.2	3.61631	0	NA	NA	NA	NA	0
91106	1	26	4	1	2	0.94	13.4	70	208.929	0.3	11.1	123	76	20.8	0	0	0	0	0	0	0	0	0	0	0	0	0	0	1911	70.81	74.58	11.89	3.83	1.63	51	5	53.9	3.98713	0	NA	NA	NA	NA	0
91108	1	49	3	0	2	5	17	70	368.696	0.5	13.3	121	81	23.2	1	1	0	0	0	0	0	0	0	0	0	0	0	0	1951	124.9	65.12	10.96	6.26	1.97	104	5.5	39.6	3.67883	15.5	NA	NA	NA	NA	2
91112	1	39	5	2	0	1.44	19	68	402.889	1.5	11.6	107	71	25.6	0	0	0	0	0	0	0	0	0	0	0	0	0	0	1374	41.78	38.87	14.65	5.15	0.85	39.2	5.7	80.6	4.3895	0	NA	NA	NA	NA	0
91113	1	31	3	0	0	1.36	14.3	80	333.143	0.5	12.8	122	72	26	0	0	0	0	0	0	0	0	0	0	0	0	0	0	2398	148.25	93.23	12.59	5.12	2.02	91.5	5.3	25.4	3.23475	0	NA	NA	NA	NA	0
91126	1	44	4	1	1	1.86	8.4	67	418.059	7.3	11.9	130	91	39.1	0	0	0	0	0	0	0	0	0	0	0	0	0	0	1193	34.01	56.61	8.07	6.7	1.55	9.5	5.9	65.1	4.17592	0	NA	NA	NA	NA	0
91133	1	24	5	2	2	0.4	24	77	626.357	0.08	13.6	105	70	19.7	0	0	0	0	0	0	0	0	0	0	0	0	0	0	1365	54.73	38.23	11.05	5.02	1.66	73	5.1	23.2	3.14415	0	NA	NA	NA	NA	0
91138	1	35	4	1	2	1.69	12.4	71	296.471	9.1	11.9	167	80	38.8	0	0	0	1	0	0	0	0	0	0	0	0	0	0	1847	52.53	47.28	20.27	4.14	1.97	46.5	5.7	30.4	3.41444	0	NA	NA	NA	NA	0
91139	1	32	3	0	2	1.2	10	69	241.5	2.01	12.9	110	67	30.9	0	0	0	0	0	0	0	0	0	0	0	0	0	0	1612	66.25	68.16	11.11	6.44	1.45	30.9	5.7	34.7	3.54674	0	NA	NA	NA	NA	0
91144	1	30	1	2	2	0.2	10.2	70	541.333	2.4	12.2	110	45	32	0	0	0	0	0	0	0	0	0	0	0	0	0	0	1168	29.22	59.5	2.44	3.75	1.45	10.8	4.9	51.8	3.94739	0	NA	NA	NA	NA	0
91155	1	44	4	1	2	5	26.5	70	613.136	8.2	13.1	102	71	38.2	0	1	0	0	0	0	0	0	0	0	0	0	0	0	2284	46.23	96.85	8.26	4.71	1.53	63.3	5	47.4	3.85862	84.1	NA	NA	NA	NA	0
91156	1	29	5	2	2	3.47	9.7	71	529.273	1.9	12.9	118	84	31	0	0	0	0	0	0	0	0	0	0	0	0	0	0	1336	48.22	55.05	3.98	4.81	1.34	110	5.7	22.9	3.13114	0	NA	NA	NA	NA	0
91163	1	28	1	2	2	1.69	23.8	65	408	1.1	13.8	95	53	25.3	1	1	0	0	0	0	0	0	0	0	0	0	0	0	2973	215.89	115.22	14.98	4.06	1.66	20.4	4.9	30.6	3.421	42.1	NA	NA	NA	NA	2
91174	1	26	2	2	2	4.07	14.7	74	198.947	0.4	13.9	106	72	18.7	0	0	0	0	0	0	0	0	0	0	0	0	0	0	2858	120.4	133.88	17.37	3.72	2.09	37.6	4.7	45	3.80666	0	NA	NA	NA	NA	0
91189	1	39	5	2	2	1.4	19.5	71	469.636	0.08	13.3	111	73	21.7	0	0	0	0	0	0	0	0	0	0	0	0	0	0	1911	70.81	74.58	11.89	4.06	2.15	98.1	5.2	22.3	3.10459	0	NA	NA	NA	NA	0
91204	1	38	4	1	2	2.62	7.5	76	42.4286	21.2	10.8	177	90	40.4	1	1	0	1	0	0	0	0	0	0	0	0	0	0	3885	81.88	150.08	17.76	3.59	1.27	39.6	5.7	48.4	3.8795	58.6	NA	NA	NA	NA	1
91211	1	40	1	2	2	2.68	7.9	76	526.244	13.5	13.9	111	72	52.8	0	0	1	1	0	0	0	0	0	0	0	0	0	0	1911	70.81	74.58	11.89	5.33	1.01	121	8.6	49.9	3.91002	0	NA	NA	NA	NA	0
91215	1	43	1	2	0	1.13	7.5	78	862.455	6	11.7	123	69	37.1	0	0	0	1	0	0	0	0	0	0	0	0	0	0	4367	160.78	199.58	16.25	5.2	1.32	10.5	6	54.8	4.00369	0	NA	NA	NA	NA	0
91216	1	29	5	2	2	5	22.7	75	497.257	2.3	14.3	112	71	34	0	0	0	0	0	0	0	0	0	0	0	0	0	0	1723	87.8	69.22	15.12	6.03	1.09	55.5	5.3	38.1	3.64021	0	NA	NA	NA	NA	0
91222	1	48	3	0	2	5	12	72	377.419	4.4	12.1	161	91	29.9	1	0	0	0	0	1	NA	NA	NA	NA	NA	NA	NA	NA	3008	126.62	184.8	19.25	3.9	1.32	121	5.4	16.9	2.82731	0	25	NA	NA	NA	2
91228	1	31	4	1	1	0.54	5.4	74	682.839	0.7	12.1	101	64	20.2	1	0	0	0	0	0	0	0	0	0	0	0	0	0	761	27.19	18.82	3.94	4.58	1.22	25.6	5.6	61.8	4.1239	0	NA	NA	NA	NA	1
91234	1	39	2	2	2	1.47	9.1	71	768.353	2.4	14.7	113	70	33	0	0	0	0	0	0	0	0	0	0	0	0	0	0	1987	64.45	81.05	12.42	4.27	1.14	43.5	5.2	55.6	4.01818	0	NA	NA	NA	NA	0
91249	1	29	3	0	2	5	22.6	69	220.176	0.08	13.8	88	62	22.1	0	0	0	0	0	0	0	0	0	0	0	0	0	0	1329	57.46	68.35	10.81	4.58	2.22	39.9	4.3	35.9	3.58074	0	NA	NA	NA	NA	0
91253	1	44	3	0	1	2.64	18.6	72	1122.04	8.4	13.9	145	93	38.6	1	0	0	1	0	0	0	0	0	0	0	0	0	0	1309	48.15	70.95	5.75	4.4	1.37	112	5.4	40.9	3.71113	0	NA	NA	NA	NA	2
91261	1	44	3	0	2	1.02	16.3	67	484.167	5.5	13.7	104	61	31.7	1	0	0	0	0	0	0	0	0	0	0	0	0	0	2233	56.89	99.93	13.59	3.75	1.53	45.8	5.2	36.3	3.59182	0	NA	NA	NA	NA	2
91271	1	44	3	0	1	1.59	7.5	71	580.884	15.2	12.8	125	87	28.6	0	0	0	0	0	0	0	0	0	0	0	0	0	0	1503	60.63	51.45	9.61	5.69	1.06	64.2	5.7	55.2	4.01096	0	NA	NA	NA	NA	0
91284	1	29	3	0	2	4.42	11.5	77	280.792	2	13.4	111	61	25.3	0	0	0	1	0	0	0	0	0	0	0	0	0	0	1239	42.01	59.79	6.44	4.45	1.71	26.7	5.1	39.2	3.66868	0	NA	NA	NA	NA	0
91290	1	39	5	2	2	0.91	10.2	84	195.905	0.7	12.8	115	73	26.9	0	0	0	0	0	0	0	0	0	0	0	0	0	0	2755	189.5	66.76	16.17	4.16	1.34	85.5	5	28.2	3.33932	0	NA	NA	NA	NA	0
91291	1	32	5	2	1	1.03	2.5	69	479.556	1.2	9.5	121	71	38.4	1	0	1	1	0	0	0	0	0	0	0	0	0	0	1330	42.06	67.36	7.43	4.71	1.5	5.19	5.6	135	4.90527	0	NA	NA	NA	NA	1
91305	1	22	4	1	2	0.66	2.9	73	143.286	0.3	10	127	85	20.3	0	0	0	0	0	0	0	0	0	0	0	0	0	0	1627	46.17	69.09	8.2	4.19	1.86	5.84	4.9	99	4.59512	0	NA	NA	NA	NA	0
91312	1	45	5	2	2	5	6.4	75	661.333	3.7	13.9	103	67	26.3	0	0	0	0	0	0	0	0	0	0	0	0	0	0	2650	90.91	95.19	20.43	7.29	0.78	169	5.6	34.9	3.55249	0	NA	NA	NA	NA	0
91323	1	26	4	1	2	2	12.4	59	406.929	1.2	12.7	113	66	31.5	1	1	0	1	0	0	0	0	0	0	0	0	0	0	2219	70.28	78.6	9.8	3.52	1.19	84.4	4.8	15.7	2.75366	43.3	NA	NA	NA	NA	1
91324	1	43	3	0	2	2.09	12.4	71	720	3	12.7	105	66	27.6	1	0	0	0	0	0	0	0	0	0	0	0	0	0	2099	82.22	69.14	11.27	4.53	1.68	50.6	5	30.4	3.41444	0	NA	NA	NA	NA	2
91328	1	45	5	2	2	5	21.1	70	672.476	0.6	12.9	122	79	25.3	0	0	0	0	0	0	0	0	0	0	0	0	0	0	972	33.54	56.01	4.29	4.97	1.4	23.3	5.4	36.6	3.60005	0	NA	NA	NA	NA	0
91334	1	39	5	2	2	5	32.1	71	658	0.7	13.9	114	65	19.7	1	1	0	0	0	0	0	0	0	0	0	0	0	0	1791	65.87	56.34	26.65	5.59	1.58	112	5.3	26	3.2581	15.5	NA	NA	NA	NA	2
91336	1	25	3	0	2	0.51	21.5	72	504	0.08	14.9	112	71	29.9	1	0	0	0	0	0	0	0	0	0	0	0	0	0	884	18.32	32.91	10.03	2.92	1.06	114	4.7	36	3.58352	0	NA	NA	NA	NA	1
91338	1	40	2	2	2	1.23	10.4	74	358.885	4.7	12.7	124	78	23.7	0	0	0	1	0	0	0	0	0	0	0	0	0	0	2637	112.77	97.08	12.86	5.46	1.99	38.3	5.3	23.6	3.16125	0	NA	NA	NA	NA	0
91340	1	38	3	0	2	2.6	9.5	73	745.957	23.1	13.8	141	83	45.4	1	0	0	0	0	0	0	0	0	0	0	0	0	0	1911	70.81	74.58	11.89	4.65	0.98	59.3	5.8	39.8	3.68387	0	NA	NA	NA	NA	1
91351	1	25	3	0	2	1.26	9.3	73	355.632	0.08	12.6	101	55	20.4	0	1	0	0	0	0	0	0	0	0	0	0	0	0	2782	86.49	119.55	19.7	4.63	1.91	8.88	5.5	40.1	3.69138	28.1	NA	NA	NA	NA	0
91358	1	43	5	2	2	1.54	5.4	64	933.143	12.1	15.2	101	69	21.1	1	0	0	0	0	0	0	0	0	0	0	0	0	0	1311	27.37	44.12	8.21	2.61	0.91	191	5.1	35.4	3.56671	0	NA	NA	NA	NA	1
91363	1	40	1	2	1	1.14	14.9	70	452.783	1.8	13.5	111	74	29	0	0	0	0	0	0	0	0	0	0	0	0	0	0	1193	41.41	28.09	20.2	4.27	0.75	30.1	5.4	23.6	3.16125	0	NA	NA	NA	NA	0
91396	1	36	3	0	2	4.12	12	74	439.971	2.4	14.3	115	63	27	1	0	0	0	0	0	0	0	0	0	0	0	0	0	1163	86.95	29.43	7.45	6.78	1.6	54	5.2	32.5	3.48124	0	NA	NA	NA	NA	1
91397	1	49	2	2	2	1.26	13.4	73	656	2.4	13.3	117	72	32.2	0	0	0	0	0	0	0	0	0	0	0	0	0	0	1777	115.9	63.37	9.43	6.1	1.32	159	5.6	48.5	3.88156	0	NA	NA	NA	NA	0
91400	1	46	4	1	2	1.12	3	73	1044.29	116.2	12.1	116	76	40.1	0	0	1	1	0	0	0	0	0	0	0	0	0	0	2130	69.39	94.46	12.39	4.5	1.81	19.1	6.3	82.5	4.4128	0	NA	NA	NA	NA	0
91404	1	34	5	2	2	4.95	13.6	78	446	1.1	12.4	108	68	25.6	0	0	0	0	0	0	0	0	0	0	0	0	0	0	1399	64.69	57.13	5.44	5.46	1.32	121	5.4	29.9	3.39786	0	NA	NA	NA	NA	0
91405	1	24	1	2	0	0.25	18.4	72	316.842	0.4	13	121	69	31.9	1	0	0	0	0	0	0	0	0	0	0	0	0	0	2291	106.71	78.05	20.91	4.16	1.68	32.9	5	44.4	3.79324	0	NA	NA	NA	NA	2
91417	1	39	4	1	2	5	8.6	66	223.184	3.2	12.5	119	77	31.9	0	1	1	0	0	0	0	0	0	0	0	0	0	0	1992	90.44	65.49	36.5	2.56	0.67	57.4	6.7	19.6	2.97553	4.8	NA	NA	NA	NA	0
91421	1	41	4	1	1	0.82	9	70	167.2	4.6	13.3	145	88	49.5	1	0	0	1	0	0	0	0	0	0	0	0	0	0	1030	30.2	34.12	2.87	5.72	1.09	61.5	5.5	40	3.68888	0	NA	NA	NA	NA	1
91425	1	46	3	0	1	2.07	8.8	70	493.455	6.1	12.2	125	64	39.8	0	0	0	0	0	0	0	0	0	0	0	0	0	0	1279	52.13	33.51	5.33	3.78	0.85	176	5.5	36.9	3.60821	0	NA	NA	NA	NA	0
91436	1	22	1	2	1	0.21	14.3	75	456	1.8	12.6	103	61	22.8	1	0	0	0	0	0	0	0	0	0	0	0	0	0	1297	29.73	60.8	6.02	2.92	1.24	26.6	5.3	28.7	3.3569	0	NA	NA	NA	NA	2
91438	1	38	1	2	0	1.25	8.2	70	620.69	1.7	13	103	66	23.6	0	0	0	0	0	0	0	0	0	0	0	0	0	0	2529	99.66	107.22	13	4.53	1.29	18.5	5.6	31.5	3.44999	0	NA	NA	NA	NA	0
91445	1	25	4	1	1	0.54	19.5	78	258.783	1.9	13.5	107	73	24.6	1	0	0	0	0	0	0	0	0	0	0	0	0	0	1941	61.13	80.57	11.15	4.16	1.6	13.4	5.5	52.6	3.96272	0	NA	NA	NA	NA	1
91475	1	24	2	2	1	1.96	8.8	71	1196.36	18.3	13.4	121	57	55.5	0	0	0	1	0	0	0	0	0	0	0	0	0	0	1443	61.49	73.28	4.67	3.75	0.85	140	5	39.8	3.68387	0	NA	NA	NA	NA	0
91477	1	35	1	2	2	1.58	6.3	70	373.5	14.8	10.5	117	65	44.9	1	0	0	0	0	0	0	0	0	0	0	0	0	0	1784	50.44	97.18	4.54	3.98	1.42	12.3	5.3	54.2	3.99268	0	NA	NA	NA	NA	2
91479	1	37	4	1	1	0.35	7	70	680.308	1.1	11.8	107	63	30.9	0	0	0	0	0	0	0	0	0	0	0	0	0	0	1874	62.89	87.05	8.96	4.86	1.45	14	5.6	56.8	4.03954	0	NA	NA	NA	NA	0
91485	1	24	5	2	2	5	22	72	855.4	3.1	14.4	101	75	26.5	0	0	0	0	0	0	0	0	0	0	0	0	0	0	1911	70.81	74.58	11.89	6.85	1.73	45.1	5.2	36	3.58352	0	NA	NA	NA	NA	0
91487	1	37	3	0	2	4.33	16.5	69	466.522	1.8	13.7	111	67	22	0	1	0	0	0	0	0	0	0	0	0	0	0	0	1702	74.98	81.98	11.01	4.71	1.76	40.9	5.2	27.8	3.32504	15.9	NA	NA	NA	NA	0
91497	1	31	1	2	2	5	10.7	72	520.882	0.3	13.8	106	69	22.4	0	0	0	0	0	0	0	0	0	0	0	0	0	0	1638	62.02	38.92	8.44	5.35	1.63	60	5.4	26.7	3.28466	0	NA	NA	NA	NA	0
91505	1	45	5	2	0	1.38	2.7	69	602.857	0.3	10.5	121	82	22.5	0	0	0	0	0	0	0	0	0	0	0	0	0	0	1911	70.81	74.58	11.89	5.04	1.53	7.35	5.9	87	4.46591	0	NA	NA	NA	NA	0
91515	1	38	3	0	2	2.24	16.1	70	290.875	0.5	14.5	109	79	22.2	1	1	0	0	0	0	0	0	0	0	0	0	0	0	2466	101.14	147.45	11.01	3.96	1.89	98.3	4.3	33.5	3.51155	54.2	NA	NA	NA	NA	2
91525	1	29	5	2	2	4.03	8.2	79	871.2	0.08	14.4	116	70	20.6	0	0	0	0	0	0	0	0	0	0	0	0	0	0	1588	72.95	43.75	12.29	5.2	2.02	76.1	5	29.4	3.38099	0	NA	NA	NA	NA	0
91527	1	41	3	0	2	1	19.2	70	418	1.2	14	103	62	25.6	1	1	0	0	0	0	0	0	0	0	0	0	0	0	708	29.55	16.59	5.85	4.01	1.27	130	5	38	3.63759	15.9	NA	NA	NA	NA	1
91530	1	26	4	1	2	3.29	11.5	71	343.2	1.6	13.6	99	67	34.4	0	0	0	0	0	0	0	0	0	0	0	0	0	0	898	22.02	46.75	4.02	5.2	1.76	53.6	6.5	54.9	4.00551	0	NA	NA	NA	NA	0
91531	1	28	1	2	0	0.74	10.9	69	543.536	5.1	13.6	122	72	30.2	0	0	0	0	0	0	0	0	0	0	0	0	0	0	1911	70.81	74.58	11.89	5.38	0.98	69.1	5.4	30.3	3.41115	0	NA	NA	NA	NA	0
91536	1	37	5	2	2	2.73	13.8	72	707.35	0.6	12.3	112	63	30	0	0	0	0	1	0	0	0	0	0	0	0	0	0	1844	43.03	75.51	7.64	5.53	1.29	47.2	5.5	37.6	3.627	0	NA	NA	NA	NA	0
91555	1	35	2	2	2	2.87	36.9	67	387.167	5.3	13.4	101	65	26	1	0	0	0	0	0	0	0	0	0	0	0	0	0	1079	51.41	51.68	5.04	5.74	2.33	60.3	5.1	23.4	3.15274	0	NA	NA	NA	NA	1
91559	1	30	3	0	0	0.25	11.3	71	351.448	2.5	13.8	115	66	25.1	1	1	0	0	0	1	1	NA	1	NA	NA	NA	NA	NA	986	55.14	35.65	4.16	4.06	1.06	73.6	5.4	37.6	3.627	24.7	15	NA	NA	NA	1
91566	1	25	3	0	2	1.63	4.3	64	589.522	11.9	10.9	116	67	46.4	1	0	0	0	0	0	0	0	0	0	0	0	0	0	2360	79.6	88.35	18.37	4.11	1.32	7.89	5.5	92.2	4.52396	0	NA	NA	NA	NA	1
91570	1	39	5	2	2	4.22	22.2	74	709.091	0.5	12.7	121	87	22.8	0	0	0	0	0	0	0	0	0	0	0	0	0	0	1911	70.81	74.58	11.89	3.8	1.14	61.8	5.2	38.5	3.65066	0	NA	NA	NA	NA	0
91581	1	35	3	0	2	5	13.4	67	427.048	2.3	13.2	106	66	30.8	0	1	0	0	0	0	0	0	0	0	0	0	0	0	1958	74.2	78.18	17.09	6.41	1.63	61.5	4.8	34.6	3.54385	11.2	NA	NA	NA	NA	0
91582	1	48	3	0	2	5	12	75	414	0.08	12.9	137	87	22.3	1	0	0	0	0	0	0	0	0	0	0	0	0	0	1341	66.97	62.43	8.17	5.25	2.38	190	5.3	27	3.29584	0	NA	NA	NA	NA	2
91583	1	46	5	2	2	2.47	4.3	77	1136.72	22.7	12.3	107	67	31.1	0	0	1	0	0	0	0	0	0	0	0	0	0	0	1530	64.24	56.51	11.87	5.43	1.53	51.8	7.4	101	4.61512	0	NA	NA	NA	NA	0
91597	1	23	3	0	2	5	11.3	71	147.396	2.5	13.4	101	61	24.8	1	1	0	0	0	0	0	0	0	0	0	0	0	0	4063	104.66	147.43	37.79	6.54	1.4	59.7	4.7	29.1	3.37074	7.7	NA	NA	NA	NA	1
91603	1	47	5	2	0	0.64	24.9	80	244.862	2.6	13.2	124	63	24.3	0	0	0	0	0	0	0	0	0	0	0	0	0	0	1569	54.56	57.94	13.31	8.48	1.14	52.6	5	34.1	3.5293	0	NA	NA	NA	NA	0
91622	1	34	1	2	0	0.74	9.9	72	867	8	14.1	119	78	39.3	1	0	0	1	0	0	0	0	0	0	0	0	0	0	2703	63.59	87.24	14.2	4.37	0.91	43.4	5.5	29.6	3.38777	0	NA	NA	NA	NA	1
91627	1	48	3	0	1	5	6.3	63	881.364	4.3	12	101	56	32.2	1	0	0	1	0	0	0	0	0	0	0	0	0	0	1546	58.7	54.51	11.43	6.31	1.5	7.35	5.4	70.4	4.25419	0	NA	NA	NA	NA	1
91630	1	29	1	2	0	1.65	6.6	68	697.667	11.9	13.9	101	69	45.2	1	0	1	0	0	0	0	0	0	0	0	0	0	0	3899	171.54	157.44	22.95	3.93	0.91	94.4	5.7	41.4	3.72328	0	NA	NA	NA	NA	2
91642	1	34	3	0	2	3.22	10.6	70	295.55	0.4	13.6	116	78	24.6	0	0	0	1	0	0	0	0	0	0	0	0	0	0	2099	73.86	110.42	26.67	6.31	1.55	59	5.1	39.2	3.66868	0	NA	NA	NA	NA	0
91663	1	46	5	2	1	0.88	14.5	77	264.32	0.6	12.8	113	67	24.5	0	0	0	0	0	0	0	0	0	0	0	0	0	0	865	25.07	12.6	5.09	4.94	1.55	214	5.3	56.6	4.03601	0	NA	NA	NA	NA	0
91675	1	48	2	2	2	0.65	7.3	68	476.414	1.2	10.4	134	80	31.9	0	0	0	0	0	0	0	0	0	0	0	0	0	0	1673	76.57	57.78	5.71	5.12	0.88	9.18	5.7	80.1	4.38328	0	NA	NA	NA	NA	0
91687	1	28	4	1	0	0.91	14.3	78	126.364	3.5	13.2	116	70	26.5	0	0	0	0	0	0	0	0	0	0	0	0	0	0	1911	70.81	74.58	11.89	4.11	3.41	76.3	6.1	28.3	3.34286	0	NA	NA	NA	NA	0
91711	1	34	5	2	2	4.12	12.4	72	772.154	3.9	11.1	115	59	35.9	0	1	0	0	0	0	0	0	0	0	0	0	0	0	2452	81.08	119.75	16.14	4.22	0.98	15.1	5.3	46.7	3.84374	8.4	NA	NA	NA	NA	0
91722	1	25	3	0	1	1.65	7.2	82	506.235	2.6	13.6	123	79	30.1	1	0	0	0	0	0	0	0	0	0	0	0	0	0	1436	36.79	56.67	6.34	4.76	1.58	13.1	4.9	58.9	4.07584	0	NA	NA	NA	NA	1
91724	1	38	3	0	2	5	12	78	257.6	0.3	14	103	71	26.9	0	1	0	0	0	0	0	0	0	0	0	0	0	0	1166	31.74	42.56	14.54	7.19	1.5	11.5	5.1	49.6	3.90399	38.2	NA	NA	NA	NA	0
91734	1	36	4	1	2	2.06	12.7	76	535.273	0.08	11.9	124	71	30.6	0	0	0	0	0	0	0	0	0	0	0	0	0	0	3036	87.23	138.02	14.2	3.57	1.45	133	5.4	31.6	3.45316	0	NA	NA	NA	NA	0
91750	1	49	3	0	2	4.93	23.3	69	427.5	0.08	14.3	101	62	21.9	0	0	0	0	0	0	0	0	0	0	0	0	0	0	1585	60.56	70.23	7.82	5.28	2.12	31.9	5.4	36.7	3.60278	0	NA	NA	NA	NA	0
91753	1	48	3	0	2	0.72	11.1	70	229.333	0.3	15.3	127	76	21	1	1	0	0	0	0	0	0	0	0	0	0	0	0	3598	147.7	149.67	13.83	7.32	1.32	95.7	5.2	26.3	3.26957	84.2	NA	NA	NA	NA	1
91771	1	39	1	2	0	0.61	6.4	73	944	4.2	11.9	109	75	29.6	1	0	1	0	0	0	0	0	0	0	0	0	0	0	1357	69.11	63.51	8.31	4.58	1.11	7.89	6.7	66.7	4.2002	0	NA	NA	NA	NA	2
91775	1	30	3	0	2	2.18	21.5	74	496.957	0.3	13.1	107	62	29.2	0	0	0	0	0	0	0	0	0	0	0	0	0	0	2787	109.45	116.61	11.54	5.53	2.33	17.3	5.1	39.9	3.68638	0	NA	NA	NA	NA	0
91785	1	34	5	2	2	3.14	15.2	73	699.053	0.2	13.8	105	67	24.3	1	1	0	0	0	0	0	0	0	0	0	0	0	0	2078	106.02	64.2	13.34	3.8	2.02	41.9	5	36.2	3.58906	55.8	NA	NA	NA	NA	2
91788	1	42	1	2	2	2.82	17.6	72	612.25	7.6	12.6	117	70	38.4	0	1	0	0	0	0	0	0	0	0	0	0	0	0	1470	37.04	50.94	4.34	4.78	1.16	18.5	5.3	37.9	3.63495	41	NA	NA	NA	NA	0
91791	1	20	5	2	2	5	21.3	68	144	0.7	12.8	96	51	18.9	0	0	0	0	0	0	0	0	0	0	0	0	0	0	1504	37.44	84.78	10.61	4.84	1.86	36.8	5	29.9	3.39786	0	NA	NA	NA	NA	0
91793	1	44	3	0	0	1.83	10.9	67	238.444	0.4	13.6	109	76	23.2	1	0	0	0	0	0	0	0	0	0	0	0	0	0	1911	70.81	74.58	11.89	5.28	1.63	101	5.6	29.4	3.38099	0	NA	NA	NA	NA	1
91803	1	37	3	0	1	3.73	7	75	495.851	11.6	14.3	125	83	41.3	0	0	0	1	0	0	0	0	0	0	0	0	0	0	2320	72.27	93.57	13.85	5.12	1.37	37.7	5.6	40.7	3.70623	0	NA	NA	NA	NA	0
91804	1	45	3	0	2	1.58	13.6	67	421.037	7.1	13.8	141	83	34.5	1	0	0	1	0	0	0	0	0	0	0	0	0	0	2075	69.45	73.25	7.06	5.12	1.01	160	6	26.6	3.28091	0	NA	NA	NA	NA	1
91807	1	25	5	2	2	2.11	6.3	75	585.103	10.5	12.8	107	71	27.8	1	1	0	1	0	0	0	0	0	0	0	0	0	0	2613	148.71	138	10.78	5.38	0.98	94	5.5	58.8	4.07414	65.4	NA	NA	NA	NA	1
91821	1	47	5	2	1	2.06	2	66	383.077	1.2	8.7	143	92	22.5	0	0	0	1	0	0	0	0	0	0	0	0	0	0	1989	58.97	95.82	11.74	4.19	1.97	4.97	5.5	122	4.80402	0	NA	NA	NA	NA	0
91826	1	42	4	1	1	0.95	2.5	68	569.231	18.9	9.6	127	75	27.1	1	0	0	1	1	1	NA	NA	NA	NA	NA	NA	NA	NA	3318	163.96	179.6	23.62	3.44	1.11	20.7	5.2	97.1	4.57574	0	29	NA	NA	NA	1
91829	1	49	4	1	0	2.21	7.9	72	363.879	16.9	11.7	134	81	25.8	0	0	1	1	0	0	0	0	0	0	0	0	0	0	1911	70.81	74.58	11.89	6.65	1.66	219	7.7	24.2	3.18635	0	NA	NA	NA	NA	0
91833	1	27	2	2	2	5	10.7	72	516	1	13.8	107	68	21.2	1	0	0	0	0	0	0	0	0	0	0	0	0	0	1909	179.57	73.38	22.31	4.29	1.78	38.7	5.2	32.5	3.48124	0	NA	NA	NA	NA	1
91834	1	39	4	1	2	2.59	14.5	63	147.097	2.9	11.8	132	79	35.5	1	0	0	1	0	0	0	0	0	0	0	0	0	0	1911	70.81	74.58	11.89	4.45	1.71	15.5	5.4	44	3.78419	0	NA	NA	NA	NA	2
91835	1	23	2	2	2	4.12	5.9	74	577.778	3.7	12.8	103	53	26.2	0	0	1	0	0	0	0	0	0	0	0	0	0	0	1614	81.7	76.27	10.04	3.75	1.58	28.5	5.9	64.2	4.162	0	NA	NA	NA	NA	0
91838	1	47	3	0	2	5	13.1	74	524.167	0.6	13.2	131	77	22.6	1	1	0	0	0	0	0	0	0	0	0	0	0	0	2199	79.27	66.3	14.67	4.47	2.17	51.8	5.1	23.1	3.13983	30.2	NA	NA	NA	NA	2
91839	1	35	4	1	2	1.4	18.1	78	1241.18	1.2	8.6	111	42	27.3	0	0	0	0	0	0	0	0	0	0	0	0	0	0	1945	68.4	104.29	8.56	3.98	1.76	9.07	5	93.9	4.54223	0	NA	NA	NA	NA	0
91842	1	49	1	2	0	0.42	17	74	526	5.5	14.4	133	69	30.1	0	0	1	0	0	0	0	0	0	0	0	0	0	0	1287	59.33	39.6	6.84	6.67	1.19	74.9	6.1	32	3.46574	0	NA	NA	NA	NA	0
91869	1	25	1	2	2	1.49	17.7	79	966.167	1.8	12.8	109	68	18.3	0	0	0	0	0	0	0	0	0	0	0	0	0	0	1911	70.81	74.58	11.89	4.42	1.91	79.3	5.4	38.8	3.65842	0	NA	NA	NA	NA	0
91887	1	28	1	2	1	0.67	16.7	72	451.2	2.8	13.5	119	59	48.6	0	0	0	0	0	0	0	0	0	0	0	0	0	0	1484	66.77	76.23	7.01	4.03	1.16	95.3	5.2	35.6	3.57235	0	NA	NA	NA	NA	0
91888	1	45	3	0	2	4.04	7.9	74	619.429	1.3	14.3	107	68	23.7	0	0	0	0	0	0	0	0	0	0	0	0	0	0	1701	69.43	66.12	14.23	4.53	1.86	42	5	47.7	3.86493	0	NA	NA	NA	NA	0
91893	1	33	5	2	2	1.17	23.1	70	348.333	3.2	14.3	119	63	34.2	0	0	0	1	0	0	0	0	0	0	0	0	0	0	775	47.17	14.37	2.71	5.28	1.06	120	5.2	28.1	3.33577	0	NA	NA	NA	NA	0
91899	1	48	5	2	2	5	11.5	69	485.647	0.08	11.7	115	71	21	0	0	1	0	0	0	0	0	0	0	0	0	0	0	1390	50.14	39	14.16	4.58	2.2	54.7	5.6	29.6	3.38777	0	NA	NA	NA	NA	0
91900	1	46	1	2	2	5	5.4	71	850.667	12.6	11.2	116	77	36.6	0	0	0	1	0	0	0	0	0	0	0	0	0	0	2462	89.21	91.57	12.84	5.12	1.47	8.32	5.8	75	4.31749	0	NA	NA	NA	NA	0
91916	1	35	3	0	2	5	23.1	74	302.774	1.1	15.4	114	66	20.6	1	1	0	0	0	1	1	NA	1	NA	NA	NA	NA	NA	1429	34.32	47.75	5.69	4.34	1.68	70.8	5.5	24.8	3.21084	57.1	15	NA	NA	NA	1
91921	1	45	5	2	1	0.74	14.5	70	502.875	5.3	13.8	141	82	34.7	0	0	0	1	0	0	0	0	0	0	0	0	0	0	2320	144.16	92.1	16.56	5.74	1.24	153	5.6	26	3.2581	0	NA	NA	NA	NA	0
91922	1	39	4	1	2	1.16	6.3	73	738.84	9	13.8	154	84	44.3	0	0	0	1	0	0	0	0	0	0	0	0	0	0	1716	70.81	96.13	9.92	6.1	1.11	93.2	5.5	44	3.78419	0	NA	NA	NA	NA	0
91927	1	24	3	0	2	3.77	12.5	74	465.882	0.5	13.1	103	58	25.8	0	0	0	0	0	0	0	0	0	0	0	0	0	0	2438	41.13	71.19	14.06	4.29	1.32	131	4.8	32.6	3.48431	0	NA	NA	NA	NA	0
91938	1	32	1	2	0	0.58	14.5	72	330.629	4.3	13.8	117	77	34.2	1	0	0	0	0	0	0	0	0	0	0	0	0	0	1628	67.84	48.31	10.81	5.46	0.83	192	5.4	18.4	2.91235	0	NA	NA	NA	NA	1
91945	1	39	2	2	2	1.38	11.6	73	549.12	2.3	12.7	117	69	44.7	0	0	0	1	0	0	0	0	0	0	0	0	0	0	2053	89.94	88.84	7.57	7.53	0.75	64.3	6.7	50.4	3.91999	0	NA	NA	NA	NA	0
91957	1	23	4	1	2	0.94	12.4	75	550	0.08	12.7	97	61	20.1	0	0	0	0	0	0	0	0	0	0	0	0	0	0	1974	65.6	74.56	14.8	3.57	1.37	41.5	5.5	30.8	3.42751	0	NA	NA	NA	NA	0
91983	1	38	3	0	2	3.52	6.1	76	943.448	8.1	13.3	122	81	33.3	1	0	0	0	0	0	0	0	0	0	0	0	0	0	2000	63.08	98.12	7.82	4.47	0.91	60.1	5.3	49.8	3.90801	0	NA	NA	NA	NA	2
91984	1	49	5	2	2	0.84	11.1	65	608	2.2	12.3	100	41	22.4	1	0	0	1	0	0	0	0	0	0	0	0	0	0	1252	43.29	42.06	13.26	5.22	1.27	14.3	5.3	33.3	3.50556	0	NA	NA	NA	NA	1
91993	1	39	1	2	0	4.14	7.2	77	288.64	31.5	12.9	123	66	46	1	0	1	0	0	0	0	0	0	0	0	0	0	0	2223	107.55	125.53	12.59	4.63	1.14	140	8.6	48.7	3.88568	0	NA	NA	NA	NA	2
91997	1	35	5	2	2	1.72	8.4	74	793.913	4.1	13.6	97	58	29	0	1	0	0	0	0	0	0	0	0	0	0	0	0	1376	34.34	87.02	4.28	5.48	1.24	59.1	5.2	31.2	3.44042	8.2	NA	NA	NA	NA	0
91999	1	33	3	0	2	5	16.7	68	369.13	0.5	14	107	69	25.6	0	0	0	0	0	0	0	0	0	0	0	0	0	0	2150	47	137.1	12.47	6.98	2.4	34.2	5.2	31.7	3.45632	0	NA	NA	NA	NA	0
92026	1	42	1	2	1	1.44	26.7	78	466.074	2	14.8	143	101	28.6	1	0	0	0	0	0	0	0	0	0	0	0	0	0	1466	49.4	72.55	7.79	5.74	1.68	165	5.5	30.1	3.40453	0	NA	NA	NA	NA	1
92037	1	26	4	1	2	3.79	14.9	73	178.588	0.8	13.8	115	70	28.6	0	0	0	0	0	0	0	0	0	0	0	0	0	0	2082	115.48	80.29	5.82	4.19	2.07	38.5	5.1	32.3	3.47507	0	NA	NA	NA	NA	0
92051	1	36	1	2	1	2.88	13.3	76	716.571	5.7	11.9	148	66	29.1	0	0	0	0	0	0	0	0	0	0	0	0	0	0	1643	73.17	58.74	11.76	4.09	1.42	37.6	5	45.2	3.8111	0	NA	NA	NA	NA	0
92062	1	40	1	2	2	3.91	4.1	66	434	1.1	12	124	72	27.4	0	1	0	0	0	0	0	0	0	0	0	0	0	0	2385	96.12	74.66	20.75	3.9	1.68	5.94	5.3	72	4.27667	20.2	NA	NA	NA	NA	0
92065	1	47	2	2	2	2.48	14.9	77	398.571	3.9	13.3	122	72	24.4	1	0	0	1	0	0	0	0	0	0	0	0	0	0	1911	70.81	74.58	11.89	3.28	1.32	188	5.6	37.4	3.62167	0	NA	NA	NA	NA	2
92081	1	49	2	2	1	1.24	8.2	67	344.276	1.9	12.7	138	72	28.5	0	0	0	0	0	0	0	0	0	0	0	0	0	0	810	38.06	12.67	19.46	6.7	0.72	14.6	5.2	57	4.04305	0	NA	NA	NA	NA	0
92092	1	32	5	2	2	2.88	11.8	74	325.895	0.7	13.1	99	74	23.5	0	0	0	0	0	0	0	0	0	0	0	0	0	0	993	43.11	17.27	7.02	4.32	1.71	163	4.8	30.6	3.421	0	NA	NA	NA	NA	0
92107	1	38	5	2	0	0.7	17.9	68	341.667	1.9	12.7	123	81	36	0	0	0	0	0	0	0	0	0	0	0	0	0	0	1911	70.81	74.58	11.89	3.85	1.42	117	5.8	18.4	2.91235	0	NA	NA	NA	NA	0
92124	1	42	4	1	2	1.58	13.3	76	261.067	17.6	12.9	131	91	43.4	0	0	1	1	0	0	0	0	0	0	0	0	0	0	4098	107.75	159.89	44.11	4.76	1.29	148	5.8	35.8	3.57795	0	NA	NA	NA	NA	0
92129	1	26	3	0	2	3.4	14	66	550.667	13.6	13.5	116	65	31.7	0	0	0	0	0	0	0	0	0	0	0	0	0	0	1800	56.4	75.13	9.82	5.17	1.89	30.8	5.4	34.8	3.54962	0	NA	NA	NA	NA	0
92140	1	48	3	0	2	1.46	17.7	69	470.4	3.5	16.2	122	85	27.6	1	0	0	0	0	0	0	0	0	0	0	0	0	0	1757	38.34	77.56	8.54	6.23	1.06	91.2	4.9	40.8	3.70868	0	NA	NA	NA	NA	1
92179	1	37	5	2	2	1.03	20.4	80	654.933	6.4	12.8	99	53	21.6	0	0	0	0	0	0	0	0	0	0	0	0	0	0	1519	104.7	31.27	12.91	4.78	1.24	78.1	5.3	41.5	3.72569	0	NA	NA	NA	NA	0
92186	1	48	3	0	2	5	17	69	538.688	0.9	14.4	113	62	27	0	0	0	0	0	0	0	0	0	0	0	0	0	0	1088	30.5	42.54	7.9	4.6	0.96	82.8	5.2	28.2	3.33932	0	NA	NA	NA	NA	0
92190	1	27	5	2	2	0.92	18.3	74	395.789	0.08	14.8	113	81	25.1	0	0	0	0	0	0	0	0	0	0	0	0	0	0	1035	52.33	22.66	6.6	5.92	1.5	30.2	5	49.2	3.89589	0	NA	NA	NA	NA	0
92194	1	47	4	1	2	1.92	7.9	68	790.182	2.9	12.3	138	89	24.5	0	1	0	0	0	0	0	0	0	0	0	0	0	0	809	18.78	12.49	3.36	4.99	1.97	334	5.2	34.8	3.54962	37.1	NA	NA	NA	NA	0
92203	1	40	1	2	0	0.21	7.2	77	596.4	8.8	12.4	121	78	41.9	0	0	0	1	0	0	0	0	0	0	0	0	0	0	4008	138.84	171.31	19.88	3.88	0.96	25.9	5.6	50.3	3.91801	0	NA	NA	NA	NA	0
92206	1	20	1	2	2	1.85	16.5	75	1008.17	0.7	13.1	101	62	18	1	0	0	0	0	0	0	0	0	0	0	0	0	0	2602	87.35	109.49	11.3	5.22	1.76	65.3	5.2	31.2	3.44042	0	NA	NA	NA	NA	2
92210	1	30	4	1	2	0.4	3.6	76	673.44	0.3	10.9	125	77	27.6	0	0	1	0	0	0	0	0	0	0	0	0	0	0	1249	72.43	53.65	8.78	5.2	1.78	6.1	11.5	127	4.84419	0	NA	NA	NA	NA	0
92212	1	33	5	2	2	4.99	17.9	70	415.154	4	13.4	105	66	31.9	0	0	0	0	0	0	0	0	0	0	0	0	0	0	1114	65.56	41.39	11.59	4.84	1.5	78.3	5.2	41.1	3.71601	0	NA	NA	NA	NA	0
92216	1	31	2	2	1	3.63	11.3	73	445.652	3	12.5	107	55	26.3	0	0	0	0	0	0	0	0	0	0	0	0	0	0	2158	53.45	108.54	5.84	3.47	1.63	26.8	4.9	44	3.78419	0	NA	NA	NA	NA	0
92220	1	39	5	2	2	1.9	15.2	69	675.093	4	14.9	139	71	31.7	0	0	0	0	0	0	0	0	0	0	0	0	0	0	2388	95.47	121.42	16.07	4.99	1.19	30.7	9.4	30	3.4012	0	NA	NA	NA	NA	0
92225	1	42	1	2	2	2.31	9.7	64	443.478	2.7	13.3	121	73	35.3	1	0	0	1	0	0	0	0	0	0	0	0	0	0	2080	77.28	84.71	27.98	4.42	0.93	14.8	5.3	31	3.43399	0	NA	NA	NA	NA	2
92233	1	49	5	2	1	1.32	18.4	70	411.857	1.2	14.6	126	79	21.9	0	0	0	0	0	0	0	0	0	0	0	0	0	0	2072	77.35	72.49	16.89	5.35	1.09	99.3	5.4	32.6	3.48431	0	NA	NA	NA	NA	0
92239	1	22	3	0	2	3.33	18.3	70	608.348	6.8	12.6	111	66	37.4	0	0	0	0	0	0	0	0	0	0	0	0	0	0	2343	80.97	77.88	21.01	3.83	1.34	35.8	5.1	29.9	3.39786	0	NA	NA	NA	NA	0
92277	1	45	3	0	1	0.21	18.3	74	511.579	0.3	14.6	146	87	24.8	1	0	0	1	0	0	0	0	0	0	0	0	0	0	1580	96.67	60.21	7.55	4.97	2.33	134	5.2	36	3.58352	0	NA	NA	NA	NA	1
92287	1	24	2	2	2	1.49	2.7	77	634.25	0.08	11.5	112	77	24	0	0	0	0	0	0	0	0	0	0	0	0	0	0	1031	39.21	39.27	4.41	3.62	1.45	6.1	5	108	4.68213	0	NA	NA	NA	NA	0
92297	1	44	1	2	2	2.61	8.1	64	420	0.3	11	95	54	25.2	0	0	0	0	0	0	0	0	0	0	0	0	0	0	2537	67.03	110.96	14.16	4.27	1.76	6.59	5.3	50.5	3.92197	0	NA	NA	NA	NA	0
92300	1	24	4	1	2	0	12	76	244.4	25.5	11.8	107	75	32.5	0	0	0	0	0	0	0	0	0	0	0	0	0	0	1525	50.73	68.13	8.23	4.68	1.29	65.5	5.4	36.6	3.60005	0	NA	NA	NA	NA	0
92302	1	33	5	2	2	3.15	10	78	2620.91	0.4	11.1	122	72	20.4	0	0	0	0	0	0	0	0	0	0	0	0	0	0	1911	70.81	74.58	11.89	3.72	1.19	4.52	5.5	105	4.65396	0	NA	NA	NA	NA	0
92307	1	35	3	0	2	1.32	5.2	78	1320.32	8.8	14.4	135	62	41.7	1	0	0	1	0	0	0	0	0	0	0	0	0	0	1278	60.27	89.17	7.1	3.8	1.5	17.8	5.4	55.2	4.01096	0	NA	NA	NA	NA	2
92319	1	40	5	2	2	5	19	69	191.167	0.8	12.1	91	61	25.1	0	0	0	0	0	0	0	0	0	0	0	0	0	0	2367	140.55	79.25	14.04	4.99	1.47	12.7	5.9	43.3	3.76815	0	NA	NA	NA	NA	0
92320	1	29	3	0	2	0	8.2	77	458.414	11	12.8	117	80	24.3	1	0	0	0	0	0	0	0	0	0	0	0	0	0	1261	45.91	71.19	8.49	4.97	1.66	75.8	4.5	49	3.89182	0	NA	NA	NA	NA	1
92326	1	29	5	2	2	2.19	14.3	71	513.545	2.01	13.8	111	82	24.9	0	0	0	0	0	0	0	0	0	0	0	0	0	0	1911	70.81	74.58	11.89	4.73	1.33	32.1	5.2	40.4	3.69883	0	NA	NA	NA	NA	0
92338	1	27	5	2	2	0.68	28.7	75	460.526	0.5	14.5	104	67	25.3	0	1	0	0	0	0	0	0	0	0	0	0	0	0	2930	160.93	58.39	15.77	4.63	1.78	125	5.2	33.4	3.50856	37	NA	NA	NA	NA	0
92346	1	43	2	2	2	3	16.1	75	569.118	1.5	13.8	121	87	36.6	0	0	0	0	0	0	0	0	0	0	0	0	0	0	2817	115.42	111.06	20.15	4.94	1.47	112	5.3	32.5	3.48124	0	NA	NA	NA	NA	0
92349	1	41	3	0	1	5	7.9	70	1090.38	3.7	13.1	128	76	34.7	1	1	0	1	0	0	0	0	0	0	0	0	0	0	2654	52.34	78.38	9.14	5.74	2.43	11.3	5.1	69	4.23411	47.7	NA	NA	NA	NA	1
92353	1	47	3	0	2	2.82	21.5	66	845.889	16.9	14.5	119	48	44.7	1	1	0	0	0	0	0	0	0	0	0	0	0	0	1095	55.61	23.89	8.35	4.91	1.27	60.3	6	35.2	3.56105	28.1	NA	NA	NA	NA	1
92358	1	21	3	0	2	4.21	20.1	71	282.286	2.6	13.7	116	55	21.8	1	0	0	0	0	0	0	0	0	0	0	0	0	0	1233	55.1	56.03	7.14	4.47	0.98	34.4	5.1	33.5	3.51155	0	NA	NA	NA	NA	2
92361	1	29	5	2	1	4.46	7.3	75	670	0.08	11	109	70	19.3	1	0	0	0	1	0	0	0	0	0	0	0	0	0	2977	100.21	105.08	33.95	4.34	2.04	6.05	5.6	85.6	4.44969	0	NA	NA	NA	NA	1
92363	1	27	4	1	1	0.09	13.6	71	365.714	2.8	12.7	112	68	47.8	1	0	0	0	1	0	0	0	0	0	0	0	0	0	1938	55.92	88.59	15.27	4.32	1.42	76	5.6	41.7	3.7305	0	NA	NA	NA	NA	1
92413	1	45	1	2	2	5	12.5	72	657.417	4.4	12.3	161	87	33.8	0	0	0	1	0	0	0	0	0	0	0	0	0	0	2188	59.03	60.62	17.19	7.24	1.45	29.1	5.9	33.6	3.51453	0	NA	NA	NA	NA	0
92419	1	45	3	0	2	1.65	8.1	72	821.793	8.9	11.6	134	87	41.6	0	0	0	0	0	0	0	0	0	0	0	0	0	0	1199	69.42	39.76	4.47	4.06	1.16	13.2	5.6	61.6	4.12066	0	NA	NA	NA	NA	0
92421	1	29	3	0	1	1.85	18.8	71	491.92	1.7	13.1	122	72	25.9	0	0	0	0	0	0	0	0	0	0	0	0	0	0	2279	52.65	106.75	18.19	8.28	1.45	27.2	5.2	50	3.91202	0	NA	NA	NA	NA	0
92423	1	37	1	2	2	0.42	5	76	477.867	9.6	12	125	67	50.9	1	0	0	0	0	1	1	NA	NA	1	NA	NA	NA	NA	2098	69.07	95.03	8.18	4.03	0.85	28.6	5.6	49.8	3.90801	0	28	NA	NA	NA	1
92428	1	33	5	2	2	5	5.6	78	470.234	4.4	12.2	143	105	26.7	0	0	0	0	0	0	0	0	0	0	0	0	0	0	2192	149.37	95.8	12.38	5.82	1.09	16.4	5.2	73.4	4.29592	0	NA	NA	NA	NA	0
92438	1	34	2	2	2	3.17	11.5	88	1220.4	1.9	12.4	113	67	17.9	0	0	0	0	0	0	0	0	0	0	0	0	0	0	2173	125.26	76.83	13.13	3.31	1.6	57.7	5.3	43.7	3.77735	0	NA	NA	NA	NA	0
92455	1	49	1	2	2	0.3	7.7	77	517.5	7.1	11.5	115	63	29.8	0	0	0	0	0	0	0	0	0	0	0	0	0	0	2686	103.42	128.7	14.86	5.61	1.01	9.5	5.8	62.2	4.13035	0	NA	NA	NA	NA	0
92475	1	49	3	0	2	5	14.1	70	232.9	0.9	13.1	120	87	18.8	0	1	0	0	0	0	0	0	0	0	0	0	0	0	1837	106.56	39.13	4.85	5.3	2.77	79	4.6	45.4	3.81551	83.8	NA	NA	NA	NA	0
92478	1	20	2	2	2	3.42	10.9	77	689.786	15.8	13.6	132	79	48.3	0	0	0	0	0	0	0	0	0	0	0	0	0	0	2565	86	122.03	17.14	5.46	0.88	115	5.8	37.4	3.62167	0	NA	NA	NA	NA	0
92485	1	30	1	2	0	0.78	14.5	82	384.545	3.1	13	105	66	25.4	0	0	0	0	0	0	0	0	0	0	0	0	0	0	1724	90.73	75.65	13.8	3.67	1.45	71	5.2	27.1	3.29953	0	NA	NA	NA	NA	0
92505	1	48	2	2	0	0.26	14.3	71	386.667	2.01	12.8	122	72	30.6	0	0	0	0	0	1	NA	NA	NA	NA	NA	NA	NA	NA	1557	88.82	43	29.38	4.73	1.33	56.3	4.9	51	3.93183	0	24	NA	NA	NA	0
92506	1	34	1	2	0	0.98	12.9	66	339.2	1.4	12.8	101	53	28.1	0	1	0	0	0	0	0	0	0	0	0	0	0	0	527	24.79	14.12	2.95	4.42	1.11	43.2	5	30.6	3.421	12.3	NA	NA	NA	NA	0
92510	1	33	3	0	2	1.23	5.6	73	377.29	8.2	12.7	113	74	39.8	0	0	0	0	0	0	0	0	0	0	0	0	0	0	1490	62.28	78.01	9.1	6	0.91	22	5.5	55.9	4.02356	0	NA	NA	NA	NA	0
92521	1	29	4	1	2	0.88	9	77	363.077	9.4	12.7	112	63	36.5	0	1	0	0	0	0	0	0	0	0	0	0	0	0	7624	287.12	340.98	30.02	4.24	1.01	27.8	5.1	49.9	3.91002	17	NA	NA	NA	NA	0
92526	1	22	5	2	2	0	15.2	79	619.043	6.3	15	113	73	34.4	1	0	0	0	0	0	0	0	0	0	0	0	0	0	953	29.22	24.9	7.56	4.6	0.93	262	5.5	29.6	3.38777	0	NA	NA	NA	NA	1
92536	1	25	2	2	2	1.94	8.8	69	309.615	7.7	11.6	98	56	22.1	1	0	0	0	0	0	0	0	0	0	0	0	0	0	2002	70.2	59.97	15.68	6.72	1.68	20.7	4.7	35	3.55535	0	NA	NA	NA	NA	2
92542	1	36	3	0	2	5	21.5	72	448.68	7.1	13.8	132	81	29.8	1	1	0	1	0	0	0	0	0	0	0	0	0	0	2097	67.11	51.72	14.03	5.07	1.71	232	4.6	30.1	3.40453	85	NA	NA	NA	NA	2
92545	1	31	3	0	2	5	17	69	319.421	0.3	12.6	100	61	25.6	0	0	0	0	0	0	0	0	0	0	0	0	0	0	1595	42.11	58.19	11.89	3.36	1.53	32.9	5.1	32.6	3.48431	0	NA	NA	NA	NA	0
92551	1	25	4	1	2	5	9.9	74	720.156	4.5	13.1	126	67	30.4	0	1	0	0	0	0	0	0	0	0	0	0	0	0	4354	224.54	203.87	17.46	3.47	1.34	34.2	5.4	42.1	3.74005	14	NA	NA	NA	NA	0
92555	1	37	3	0	0	1.15	5.7	58	670.429	12.4	13.5	125	76	35.4	1	0	0	0	0	0	0	0	0	0	0	0	0	0	772	25.94	38.67	5.37	3.65	1.27	77.7	5.3	26.6	3.28091	0	NA	NA	NA	NA	1
92566	1	27	3	0	2	3.37	20.1	69	423	0.5	13	97	51	23.6	1	1	0	0	0	0	0	0	0	0	0	0	0	0	2610	76.96	91.84	9.79	3.75	2.02	24.9	5	34.2	3.53223	98.7	NA	NA	NA	NA	1
92573	1	42	3	0	0	1.25	4.5	71	2322.46	36.5	11.9	144	87	41.9	1	0	1	0	0	0	0	0	0	0	0	0	0	0	1294	59.95	27.21	24.94	4.45	1.19	45.4	8	82.2	4.40916	0	NA	NA	NA	NA	1
92586	1	36	4	1	2	5	5.4	68	1075.57	19.4	12.2	134	80	48.2	1	0	0	0	0	0	0	0	0	0	0	0	0	0	2491	120.96	121.03	17.87	4.37	1.03	85.9	5.3	65.4	4.18052	0	NA	NA	NA	NA	2
92624	1	23	4	1	0	0.56	3.9	70	1072.06	2.6	12.8	107	61	28.9	1	0	0	0	0	0	0	0	0	0	0	0	0	0	136	1.82	8.7	0.38	2.59	1.29	13.3	5.1	45.2	3.8111	0	NA	NA	NA	NA	1
92625	1	38	5	2	2	2.29	12.7	69	458.769	2.4	12.8	117	76	31.4	0	1	0	0	0	0	0	0	0	0	0	0	0	0	1287	62.47	37.04	7.61	5.2	0.93	56.4	5.4	40.6	3.70377	22.3	NA	NA	NA	NA	0
92633	1	34	3	0	2	5	26.5	72	449.143	1.4	13.6	117	62	28.3	0	1	0	0	0	0	0	0	0	0	0	0	0	0	2049	62.24	75.11	19.76	4.03	2.02	71.5	4.7	27	3.29584	31.8	NA	NA	NA	NA	0
92634	1	23	5	2	2	5	13.4	74	353.182	3	13	115	79	26	0	0	0	0	0	0	0	0	0	0	0	0	0	0	1462	59.16	78.09	8.95	4.22	1.22	44	5.8	24.1	3.18221	0	NA	NA	NA	NA	0
92642	1	34	3	0	2	1.09	8.8	69	335.31	2.1	13	119	67	32.3	1	0	0	0	0	0	0	0	0	0	0	0	0	0	3496	103.64	174.37	21.28	4.68	1.37	40.9	5.3	33.6	3.51453	0	NA	NA	NA	NA	1
92651	1	33	1	2	0	0.99	6.4	75	475.556	1.3	13	107	66	31	0	0	0	0	0	0	0	0	0	0	0	0	0	0	1911	70.81	74.58	11.89	6.1	0.96	18.4	5.4	86.4	4.45899	0	NA	NA	NA	NA	0
92657	1	24	1	2	0	1.24	7.9	71	1144.05	0.08	13.5	99	61	26.5	0	0	0	0	0	0	0	0	0	0	0	0	0	0	2039	59.86	58.64	12.14	4.37	1.32	11.7	5.1	56.8	4.03954	0	NA	NA	NA	NA	0
92668	1	45	4	1	2	1.31	8.1	74	156.364	0.6	12.1	120	70	24.7	0	0	0	0	0	0	0	0	0	0	0	0	0	0	1535	57.75	56.35	17.4	5.22	1.24	87	5.5	41.9	3.73529	0	NA	NA	NA	NA	0
92674	1	45	1	2	1	0.74	26.7	79	422.846	8.5	14.9	119	56	27.1	0	0	1	0	0	0	0	0	0	0	0	0	0	0	1341	59.77	28.8	11.9	6.1	1.4	202	7.8	29.1	3.37074	0	NA	NA	NA	NA	0
92675	1	30	1	2	2	2.75	16.3	73	312.667	1.6	14	109	80	22.9	1	1	0	0	0	0	0	0	0	0	0	0	0	0	3934	127.67	126.71	20.03	4.32	1.89	50.8	5.3	26.7	3.28466	113.2	NA	NA	NA	NA	1
92681	1	25	2	2	2	1.57	19	80	408	1.6	13.9	104	73	21.3	0	0	0	0	0	0	0	0	0	0	0	0	0	0	1915	49.83	61.08	14.42	6.65	1.34	259	4.9	26.9	3.29213	0	NA	NA	NA	NA	0
92687	1	38	5	2	2	5	5.6	69	330.909	1.7	11.1	159	95	25.2	0	0	0	0	0	0	0	0	0	0	0	0	0	0	1219	30.8	25.06	17.6	5.17	1.32	6.16	5.5	73.4	4.29592	0	NA	NA	NA	NA	0
92717	1	22	4	1	1	1.23	2.9	72	309.92	2.1	9.9	117	56	30.8	0	0	0	0	0	0	0	0	0	0	0	0	0	0	1574	65.23	83.28	5.42	3.41	1.34	6.59	5.6	76.2	4.33336	0	NA	NA	NA	NA	0
92735	1	34	5	2	1	4.53	8.6	72	721.233	5.1	12.8	113	63	37.3	0	0	0	0	0	0	0	0	0	0	0	0	0	0	1695	58.32	65.94	11.02	4.01	1.16	33	5.6	31.3	3.44362	0	NA	NA	NA	NA	0
92741	1	27	5	2	2	3.82	13.4	67	236.5	0.08	12.3	109	67	22.1	0	1	0	0	0	0	0	0	0	0	0	0	0	0	1831	109.99	68.94	15.16	5.12	2.3	28.6	5.2	41.2	3.71844	12.3	NA	NA	NA	NA	0
92742	1	22	1	2	2	0.62	10	72	606.194	13.3	13.4	105	64	33.7	0	0	0	0	0	0	0	0	0	0	0	0	0	0	1015	22.87	44.86	4.58	4.29	1.71	30.8	5.5	28.3	3.34286	0	NA	NA	NA	NA	0
92745	1	23	1	2	2	1.07	9.5	75	1220.56	5.2	13.1	99	65	26.8	0	0	0	0	0	0	0	0	0	0	0	0	0	0	3130	89.51	126.04	21.35	3.21	1.6	48.2	4.8	40.8	3.70868	0	NA	NA	NA	NA	0
92748	1	41	4	1	2	1.19	7.7	68	169.826	0.3	11.7	135	79	26.6	0	1	0	1	1	0	0	0	0	0	0	0	0	0	2067	64.88	116.14	9.24	5.51	1.84	10.7	5.7	51.4	3.93964	42.2	NA	NA	NA	NA	0
92761	1	26	3	0	2	5	6.3	70	540.698	13.3	13	138	73	38.7	0	0	0	1	0	0	0	0	0	0	0	0	0	0	1645	62.56	111.81	7.62	5.2	1.14	96.9	5.6	50.3	3.91801	0	NA	NA	NA	NA	0
92762	1	47	5	2	2	5	15.6	72	609.75	10.3	12.9	119	82	31.1	0	0	0	0	0	0	0	0	0	0	0	0	0	0	1503	57.91	51.38	12.25	4.84	1.09	17.9	5.8	34.3	3.53515	0	NA	NA	NA	NA	0
92767	1	41	1	2	0	0.8	11.3	73	569.8	0.6	13.5	107	61	29.3	0	1	0	0	0	0	0	0	0	0	0	0	0	0	2715	93.13	69.99	20.26	6.05	1.37	21.7	4.9	41.3	3.72086	11.2	NA	NA	NA	NA	0
92768	1	34	2	2	0	0.55	6.8	71	773.875	6.8	12.2	105	81	36.7	0	0	0	0	0	0	0	0	0	0	0	0	0	0	2635	84.84	93.08	12.06	4.06	0.83	22.1	5.8	54.9	4.00551	0	NA	NA	NA	NA	0
92769	1	47	4	1	2	1.76	9.1	73	408.281	3.3	12.7	122	72	29.1	0	0	0	0	0	0	0	0	0	0	0	0	0	0	1911	70.81	74.58	11.89	5.33	1.19	146	5.4	57.7	4.05526	0	NA	NA	NA	NA	0
92773	1	26	2	2	1	1.36	10.6	75	302.448	3.5	13.8	103	54	26.2	1	0	0	0	0	0	0	0	0	0	0	0	0	0	1033	46.2	40.05	5.48	4.5	2.28	211	5.2	31	3.43399	0	NA	NA	NA	NA	1
92784	1	23	3	0	2	2.46	21.9	67	1596	0.2	13.9	122	72	26.8	0	0	0	0	0	0	0	0	0	0	0	0	0	0	1911	70.81	74.58	11.89	5.61	1.91	27.8	4.9	25.6	3.24259	0	NA	NA	NA	NA	0
92788	1	31	3	0	1	2.98	12.9	69	238	1	14.3	112	63	34.8	1	0	0	0	0	0	0	0	0	0	0	0	0	0	1704	80.37	75.94	7.44	5.48	1.47	61.4	5.1	27.6	3.31782	0	NA	NA	NA	NA	2
92802	1	38	3	0	2	5	4.1	72	360	5.6	13.1	111	75	45.6	0	0	0	0	1	0	0	0	0	0	0	0	0	0	1911	70.81	74.58	11.89	5.2	1.5	13.4	5.6	65.7	4.1851	0	NA	NA	NA	NA	0
92804	1	37	4	1	2	2.47	3.9	71	744	0.5	10.3	123	73	39	0	0	0	0	0	0	0	0	0	0	0	0	0	0	1627	157.41	45.27	7.71	5.87	1.45	6.56	5.1	118	4.77068	0	NA	NA	NA	NA	0
92812	1	37	1	2	2	1.76	19	70	900.375	5.4	14.3	121	72	41.3	0	0	1	1	0	0	0	0	0	0	0	0	0	0	5107	181.16	233.31	36.58	3.59	1.09	117	5.6	33.3	3.50556	0	NA	NA	NA	NA	0
92815	1	22	2	2	1	1.49	8.1	75	474.923	3	13.3	109	66	35.6	0	0	0	0	0	0	0	0	0	0	0	0	0	0	2658	120.15	98.29	10.73	3.78	1.32	50.3	5.4	26.1	3.26194	0	NA	NA	NA	NA	0
92825	1	31	4	1	0	0.28	5.4	80	674.061	3.2	11.9	111	61	29.1	0	1	0	0	0	0	0	0	0	0	0	0	0	0	1960	69.16	58.02	19.85	4.76	1.55	12.5	5.3	59.2	4.08092	28.1	NA	NA	NA	NA	0
92827	1	37	4	1	1	0.42	10.2	73	510.353	4.9	12.4	117	61	34.1	1	0	0	0	0	0	0	0	0	0	0	0	0	0	2311	98.56	108	13.03	4.27	1.4	15.4	5.2	49.4	3.89995	0	NA	NA	NA	NA	1
92838	1	47	1	2	1	0.99	12.7	73	616	12	13.1	105	71	30	0	0	0	0	0	0	0	0	0	0	0	0	0	0	2928	132.26	132.1	28.16	6.44	1.16	216	5.4	41.5	3.72569	0	NA	NA	NA	NA	0
92846	1	23	3	0	1	1.77	11.8	79	386.4	7.3	13.6	109	61	39.1	0	0	0	0	0	0	0	0	0	0	0	0	0	0	519	47.5	11.87	12.69	4.47	1.19	72.2	5.4	47.2	3.85439	0	NA	NA	NA	NA	0
92857	1	48	4	1	0	0.71	7.2	72	533.077	3.5	12.6	97	67	32.4	0	0	0	0	0	0	0	0	0	0	0	0	0	0	1911	70.81	74.58	11.89	5.33	1.03	27.5	5.3	60.2	4.09767	0	NA	NA	NA	NA	0
92858	1	31	5	2	2	0.19	17.9	69	226.087	1.9	13.7	114	70	28.8	1	0	0	0	0	0	0	0	0	0	0	0	0	0	2288	97.16	96.6	18.32	5.66	1.78	32.2	5.4	25.3	3.2308	0	NA	NA	NA	NA	2
92861	1	36	4	1	2	0.99	14.3	77	406.421	1.3	12.1	113	53	27.1	0	0	0	0	0	0	0	0	0	0	0	0	0	0	1494	70.27	61.44	10.28	4.55	1.81	74	5.6	26.1	3.26194	0	NA	NA	NA	NA	0
92871	1	23	3	0	2	3.07	17.2	75	854.267	0.9	14.9	102	61	19.2	0	0	0	0	0	0	0	0	0	0	0	0	0	0	1741	46.9	56.78	31.28	3.83	1.42	77.5	5	36.2	3.58906	0	NA	NA	NA	NA	0
92891	1	49	4	1	2	5	14.3	71	427.217	2.01	13.3	157	79	23.5	0	0	0	0	0	0	0	0	0	0	0	0	0	0	1524	51.54	68.53	10.57	4.73	1.33	55.5	5.4	26.7	3.28466	0	NA	NA	NA	NA	0
92922	1	30	4	1	0	0.85	6.6	72	448.68	28.1	13.8	131	92	42.6	1	1	0	1	0	0	0	0	0	0	0	0	0	0	3745	121.31	143.36	17.1	3.54	0.91	55.8	7.8	56.3	4.03069	61.6	NA	NA	NA	NA	1
92957	1	24	4	1	2	4.76	13.1	73	778.476	1.8	12.9	103	61	32.7	0	0	0	0	0	0	0	0	0	0	0	0	0	0	1530	75.23	64.48	6.26	4.71	1.22	68.7	4.9	35.8	3.57795	0	NA	NA	NA	NA	0
92970	1	25	3	0	2	2.82	14.9	63	624.409	1.2	14.5	109	56	26.8	1	0	0	0	0	0	0	0	0	0	0	0	0	0	1459	55.4	48.52	7.82	3.47	0.93	43.1	5.1	31.7	3.45632	0	NA	NA	NA	NA	1
92985	1	22	2	2	2	2.68	18.4	71	434	3.1	14.1	104	57	23.1	0	0	0	0	0	0	0	0	0	0	0	0	0	0	686	14.22	24.53	5.31	3.44	1.11	133	5.1	20.1	3.00072	0	NA	NA	NA	NA	0
92998	1	39	2	2	2	5	15.6	69	645.429	5.5	13.5	113	62	33.9	0	0	0	0	0	0	0	0	0	0	0	0	0	0	1178	33.54	39.53	6.75	4.16	1.4	95.1	5	24.9	3.21487	0	NA	NA	NA	NA	0
93002	1	30	3	0	2	5	10.2	77	580.667	0.8	13.7	113	64	19.8	1	1	0	0	0	0	0	0	0	0	0	0	0	0	3018	93.66	74.78	11.44	5.12	2.92	12.2	5.1	56.9	4.0413	133.9	NA	NA	NA	NA	2
93024	1	40	4	1	2	3.3	9.7	68	553.125	4.4	13.8	129	71	28.2	0	0	1	0	0	0	0	0	0	0	0	0	0	0	2272	85.41	112.67	14.75	5.09	1.37	90	11.1	45.4	3.81551	0	NA	NA	NA	NA	0
93030	1	42	1	2	2	5	3.4	67	236.077	0.5	11.6	117	57	24.5	0	0	0	0	0	0	0	0	0	0	0	0	0	0	2835	108.76	156	13.03	5.28	2.38	7.78	5.7	71.4	4.2683	0	NA	NA	NA	NA	0
93039	1	49	1	2	0	0.98	8.1	73	786.947	6.6	13	121	79	30.6	0	0	0	0	0	0	0	0	0	0	0	0	0	0	1938	101.99	78.09	15.14	5.38	0.93	60.3	5.6	29.7	3.39115	0	NA	NA	NA	NA	0
93050	1	20	4	1	2	1.19	5	73	919.929	4	12	105	63	27.7	0	0	0	0	0	0	0	0	0	0	0	0	0	0	1587	69.96	88.17	7.05	5.25	1.22	33.7	5.1	69.4	4.23989	0	NA	NA	NA	NA	0
93073	1	33	2	2	2	1.63	4.1	61	510	0.3	11.2	106	55	21.5	1	0	0	0	0	0	0	0	0	0	0	0	0	0	1490	36.39	49.25	14.63	3.49	1.81	7.35	5.1	79.8	4.37952	0	NA	NA	NA	NA	2
93074	1	44	3	0	2	5	15	71	926.556	1.5	14.4	121	85	29	0	0	0	0	0	0	0	0	0	0	0	0	0	0	1811	90.18	85.68	8.82	5.04	1.11	30.1	5.1	29.6	3.38777	0	NA	NA	NA	NA	0
93075	1	49	5	2	2	3.49	16.1	73	198.244	0.7	12.3	139	89	23.1	0	1	0	1	0	1	1	1	NA	NA	NA	NA	NA	NA	1584	63.5	33.44	11.73	7.42	1.32	23.7	5.5	47.8	3.86703	22.3	14	NA	NA	NA	0
93086	1	48	3	0	2	5	15.6	69	833.538	0.5	13.6	114	75	23.4	0	0	0	0	0	0	0	0	0	0	0	0	0	0	1805	78.58	69.69	10.39	5.53	1.55	71.1	4.8	45.4	3.81551	0	NA	NA	NA	NA	0
93093	1	45	3	0	2	1.75	14.9	70	453.6	10.2	14.2	136	83	44.6	1	0	0	0	0	0	0	0	0	0	0	0	0	0	1419	51.95	47.16	6.92	5.2	1.4	97.7	5.1	33.5	3.51155	0	NA	NA	NA	NA	1
93098	1	30	4	1	2	2.06	13.3	70	242.778	0.7	12	100	65	21.6	0	1	0	0	0	0	0	0	0	0	0	0	0	0	1733	41.38	79.4	10.54	3.28	1.63	92.9	4.8	34.6	3.54385	22.3	NA	NA	NA	NA	0
93115	1	28	1	2	0	0.63	16.3	65	91.1429	3	13	109	57	29.3	0	0	0	0	0	0	0	0	0	0	0	0	0	0	935	53.79	25.45	5.85	4.22	1.89	14	5.2	39.2	3.66868	0	NA	NA	NA	NA	0
93116	1	47	4	1	2	2.38	14.3	71	62.1892	2.01	12.7	111	73	20	0	0	0	0	0	0	0	0	0	0	0	0	0	0	3187	116.04	153.1	13.47	4.73	1.33	133	5.6	15	2.70805	0	NA	NA	NA	NA	0
93120	1	30	3	0	2	2.97	14.9	68	1075.21	13.3	13.7	116	77	35.6	0	0	0	0	0	0	0	0	0	0	0	0	0	0	2155	74.98	80.53	22.76	8.66	0.85	142	5.8	29.6	3.38777	0	NA	NA	NA	NA	0
93123	1	30	4	1	2	2.61	12.2	64	124.308	1.1	13	123	79	28.3	0	1	0	0	0	0	0	0	0	0	0	0	0	0	3377	76.71	150.54	11.31	3.34	1.29	43.6	5.2	37.1	3.61362	4.2	NA	NA	NA	NA	0
93161	1	27	5	2	2	2.51	14.7	66	184.92	1	13.1	106	67	20.9	0	0	0	0	0	0	0	0	0	0	0	0	0	0	2960	96.84	170.53	13.59	5.15	1.78	29.7	5.3	31.7	3.45632	0	NA	NA	NA	NA	0
93169	1	27	2	2	2	5	21.1	80	838.588	0.7	13.1	106	71	26.4	0	0	0	0	0	0	0	0	0	0	0	0	0	0	3268	90.97	143.4	18.59	3.88	1.94	55	4.9	33	3.49651	0	NA	NA	NA	NA	0
93174	1	23	1	2	2	2.48	9.7	71	338.345	0.8	13.4	119	49	24.4	1	0	0	0	0	0	0	0	0	0	0	0	0	0	2221	139.49	100.39	13.73	4.03	1.73	46.9	5	25.5	3.23868	0	NA	NA	NA	NA	1
93178	1	20	5	2	2	3.09	5.4	61	419.25	4.6	13.2	122	72	38.7	0	0	0	0	0	1	NA	NA	NA	NA	NA	NA	NA	NA	2090	59.2	76.66	9.92	3.75	1.11	42.6	5.5	42.4	3.74715	0	25	NA	NA	NA	0
93181	1	46	1	2	1	4.96	12	75	577.5	3.3	13.7	114	72	30.2	0	1	0	0	0	0	0	0	0	0	0	0	0	0	1430	43.82	58.74	11.17	5.2	1.37	39.5	5.2	36.3	3.59182	22.3	NA	NA	NA	NA	0
93185	1	44	4	1	2	3.37	6.4	75	583	21.4	10	114	76	44.1	0	0	0	0	0	0	0	0	0	0	0	0	0	0	1391	42.9	62.8	4.82	4.73	1.19	19.6	6.5	53.5	3.97968	0	NA	NA	NA	NA	0
93189	1	47	1	2	0	1.64	18.1	71	303.333	1.6	13	111	60	32.5	1	0	0	0	0	1	1	NA	1	NA	NA	NA	NA	NA	1610	54.44	41.41	13.34	5.2	1.97	9.61	5.2	51	3.93183	0	15	NA	NA	NA	2
93206	1	44	2	2	2	1.26	15	74	242.25	0.9	13.2	127	59	33.2	0	1	0	0	0	0	0	0	0	0	0	0	0	0	1915	76.69	76.53	9.15	5.22	1.84	23.4	5.2	32.8	3.49043	17.7	NA	NA	NA	NA	0
93213	1	32	1	2	0	1.24	18.6	67	371.368	0.6	14.5	103	69	28.3	1	1	0	0	0	0	0	0	0	0	0	0	0	0	1460	74.17	24.78	7.63	4.27	1.58	41	5.2	20.7	3.03013	28.1	NA	NA	NA	NA	2
93222	1	22	3	0	1	2.68	23.8	68	335.077	4.3	14.8	123	73	24.9	0	0	0	0	0	0	0	0	0	0	0	0	0	0	2788	95.88	127.07	26.96	6.96	2.43	61.1	5.2	30.2	3.40784	0	NA	NA	NA	NA	0
93242	1	46	4	1	1	0.49	7.5	79	157.955	7.5	12.7	116	70	21.2	0	0	0	0	0	0	0	0	0	0	0	0	0	0	1251	94.26	23.58	15.18	4.27	2.07	60.9	5.6	33.4	3.50856	0	NA	NA	NA	NA	0
93261	1	24	5	2	2	0.46	12.4	73	719.533	0.08	12.9	108	61	17.5	0	0	0	0	0	0	0	0	0	0	0	0	0	0	1448	20.99	85.45	6.18	3.96	1.68	64.4	5	42	3.73767	0	NA	NA	NA	NA	0
93266	1	46	5	2	0	1.19	18.4	71	176.167	1.4	12.8	111	71	24.6	1	0	0	1	0	0	0	0	0	0	0	0	0	0	1590	73.65	16.31	19.51	7.14	1.01	246	5.4	26.9	3.29213	0	NA	NA	NA	NA	1
93267	1	35	3	0	2	4.22	10.4	64	203.538	0.3	13.3	108	61	21.3	0	0	0	0	0	0	0	0	0	0	0	0	0	0	1911	70.81	74.58	11.89	4.65	2.2	50.3	5.3	36.3	3.59182	0	NA	NA	NA	NA	0
93274	1	23	3	0	2	0.08	8.2	81	660.879	41	13.5	129	63	41.5	1	0	0	0	0	0	0	0	0	0	0	0	0	0	2178	80.07	72.27	5.76	5.33	1.22	206	5.4	32.1	3.46886	0	NA	NA	NA	NA	1
93275	1	40	3	0	2	3.75	19.7	75	486.818	3.2	14.5	129	65	27.6	0	0	0	0	0	0	0	0	0	0	0	0	0	0	1692	72.28	29.61	21.65	5.04	1.76	38.3	5	31.4	3.44681	0	NA	NA	NA	NA	0
93277	1	40	1	2	0	1.94	21.3	69	362.667	7.6	12.8	97	63	36.2	0	0	0	0	0	0	0	0	0	0	0	0	0	0	3735	152.44	155.35	22.27	5.25	1.47	56.9	5.6	21.5	3.06805	0	NA	NA	NA	NA	0
93279	1	46	4	1	2	1.49	2.5	74	228.125	1.4	8.9	113	55	29.8	0	0	0	0	0	0	0	0	0	0	0	0	0	0	886	19.09	50.63	1.34	3.31	1.22	5.3	5.6	140	4.94164	0	NA	NA	NA	NA	0
93305	1	25	1	2	2	1.5	14.7	70	508.345	2.5	13.6	109	66	32.7	0	0	0	0	0	0	0	0	0	0	0	0	0	0	2707	112.56	120.79	20.56	4.47	1.11	33.1	5.4	27.3	3.30689	0	NA	NA	NA	NA	0
93306	1	43	5	2	2	3.47	3.6	75	649.308	4.4	9.1	131	79	26.8	0	0	0	0	0	0	0	0	0	0	0	0	0	0	1478	61.35	45.03	13.8	5.09	1.32	4.11	5.6	166	5.11199	0	NA	NA	NA	NA	0
93325	1	28	3	0	2	3.48	4.1	70	768.056	24.3	11.9	119	69	41.7	1	0	0	0	0	0	0	0	0	0	0	0	0	0	1398	53.13	53.05	9.69	4.22	1.5	48.1	5.7	60.7	4.10594	0	NA	NA	NA	NA	2
93330	1	30	5	2	2	2.99	7.5	76	266	0.08	12.4	103	63	22.6	0	0	0	0	0	0	0	0	0	0	0	0	0	0	1898	107.84	82.11	9.43	5.56	1.68	3.14	5.8	54.9	4.00551	0	NA	NA	NA	NA	0
93333	1	43	1	2	1	4.99	11.5	76	328	0.8	13.5	116	77	36.6	0	0	0	0	0	0	0	0	0	0	0	0	0	0	1290	40.92	57.1	5.53	5.07	1.37	30.7	5.6	31.4	3.44681	0	NA	NA	NA	NA	0
93345	1	36	4	1	2	3.03	8.4	77	591.923	24.3	12.2	139	82	62.7	0	0	0	0	0	0	0	0	0	0	0	0	0	0	1468	55.15	57.17	10.24	5.38	1.53	28.7	5.9	68.6	4.22829	0	NA	NA	NA	NA	0
93352	1	40	5	2	2	1.84	13.4	72	683.2	0.7	12.6	107	66	23.1	0	1	0	0	0	0	0	0	0	0	0	0	0	0	1347	96.91	43.67	10.73	4.63	1.37	54.6	5.4	30.1	3.40453	3	NA	NA	NA	NA	0
93365	1	26	3	0	2	3.2	7.9	68	661.85	0.08	12.4	119	60	22	0	1	0	0	0	0	0	0	0	0	0	0	0	0	1515	66.14	54.79	8.12	4.53	2.28	13.2	4.9	44.4	3.79324	28.8	NA	NA	NA	NA	0
93368	1	35	4	1	2	0.97	10.2	77	608.833	19.9	13.1	111	85	45.1	0	0	0	0	0	0	0	0	0	0	0	0	0	0	1911	70.81	74.58	11.89	4.94	1.55	46.4	6.3	55.1	4.00915	0	NA	NA	NA	NA	0
93375	1	36	3	0	0	0.92	8.4	73	248.857	0.6	14	101	63	17.9	1	0	0	0	0	0	0	0	0	0	0	0	0	0	1099	13.9	37.84	3.21	4.06	1.66	14.7	5.4	44.8	3.80221	0	NA	NA	NA	NA	1
93392	1	26	3	0	2	0.38	13.6	72	1854.66	5.8	14.5	135	63	43.3	0	0	0	0	0	0	0	0	0	0	0	0	0	0	1832	92.35	73.34	17.47	5.25	2.09	56.1	5.6	58.2	4.06389	0	NA	NA	NA	NA	0
93426	1	43	2	2	2	2.67	12.7	71	312.429	0.08	12.1	125	83	23.1	0	0	0	0	0	0	0	0	0	0	0	0	0	0	2681	104.01	102.91	20.02	5.61	2.07	23.5	5.2	42.8	3.75654	0	NA	NA	NA	NA	0
93428	1	30	1	2	0	0.3	14.3	80	543.529	5.5	10.5	116	66	29.3	0	0	0	0	0	0	0	0	0	0	0	0	0	0	1801	88.61	50.03	14.73	4.14	1.34	8.64	5.9	83	4.41884	0	NA	NA	NA	NA	0
93429	1	26	1	2	1	1	6.1	75	664.194	0.9	12.8	101	59	18.7	0	1	0	0	0	1	1	NA	NA	1	NA	NA	NA	NA	4071	41.76	56.56	8.11	4.27	1.55	32.2	5.5	41.3	3.72086	153.6	28	NA	NA	NA	0
93430	1	26	3	0	2	0.78	27.8	75	820	0.08	12.6	96	56	21.8	0	0	0	0	0	0	0	0	0	0	0	0	0	0	1201	39.27	44.67	25.17	5.66	1.68	31.9	5.4	34.7	3.54674	0	NA	NA	NA	NA	0
93434	1	36	4	1	1	1.2	4.1	72	321.923	0.08	9.9	124	75	22.1	1	1	0	0	0	0	0	0	0	0	0	0	0	0	4972	189.61	246.82	25.73	3.26	2.3	12.2	4.5	114	4.7362	18.7	NA	NA	NA	NA	1
93457	1	25	4	1	2	0.94	16.3	78	375.048	0.9	12.4	122	72	29	0	0	0	1	0	0	0	0	0	0	0	0	0	0	1715	60.09	85.33	11.5	8.09	1.86	21.3	4.7	69.5	4.24133	0	NA	NA	NA	NA	0
93459	1	44	2	2	0	1.24	12.7	70	358.846	2.1	11.9	116	74	33.7	0	0	0	0	0	0	0	0	0	0	0	0	0	0	1470	41	25.4	12.33	4.58	1.71	74.9	5.7	22.1	3.09558	0	NA	NA	NA	NA	0
93483	1	42	3	0	2	4.3	13.6	71	511.875	2.3	13.2	130	89	31.9	0	0	0	1	0	0	0	0	0	0	0	0	0	0	2897	133.9	85.9	21.69	3.47	1.06	51.8	5.5	28	3.3322	0	NA	NA	NA	NA	0
93488	1	47	4	1	2	5	7.7	75	480.421	4	12.6	107	66	23.2	0	0	0	0	0	0	0	0	0	0	0	0	0	0	1089	35.8	48.67	13.24	3.08	1.45	24	5.8	40.6	3.70377	0	NA	NA	NA	NA	0
93499	1	30	4	1	2	2.95	7.5	71	326.323	0.6	12.6	118	69	27.3	0	1	0	0	0	0	0	0	0	0	0	0	0	0	1942	58.18	101.68	8.84	4.55	1.89	56.4	5.1	40.2	3.69387	21.6	NA	NA	NA	NA	0
93509	1	21	1	2	2	0.49	6.6	67	301.667	0.3	13.2	98	51	20.8	0	0	0	0	0	0	0	0	0	0	0	0	0	0	3833	106.3	142.25	17.64	4.14	1.27	70.5	5.2	25.6	3.24259	0	NA	NA	NA	NA	0
93511	1	40	4	1	1	0.99	14.5	83	471.667	1.5	14.5	153	111	35.3	0	0	1	1	0	0	0	0	0	0	0	0	0	0	999	40.73	20.42	18.99	4.6	1.11	20.5	12.2	53.2	3.97406	0	NA	NA	NA	NA	0
93516	1	43	2	2	2	2.62	7.7	75	739.556	3.1	12.9	121	82	30.3	0	0	0	0	0	0	0	0	0	0	0	0	0	0	576	19.59	21.62	2.82	4.91	1.16	31.6	5.3	38.8	3.65842	0	NA	NA	NA	NA	0
93524	1	26	1	2	2	2.99	9	70	641.062	37.7	13.2	107	53	44.3	0	0	0	0	0	0	0	0	0	0	0	0	0	0	1453	58.23	39.29	10.37	3.93	1.34	94.7	5.4	22.8	3.12676	0	NA	NA	NA	NA	0
93535	1	31	2	2	0	0.88	14.3	71	499.84	3.3	11.9	115	63	47.7	0	0	0	0	0	0	0	0	0	0	0	0	0	0	895	33.31	30.57	3.47	4.45	1.4	16.7	5.6	34.8	3.54962	0	NA	NA	NA	NA	0
93556	1	21	4	1	1	0.52	7.9	79	280.552	0.4	12	115	56	29.6	0	0	0	0	0	0	0	0	0	0	0	0	0	0	898	93.19	23.51	3.57	5.38	1.76	11.1	5.5	66.3	4.19419	0	NA	NA	NA	NA	0
93568	1	46	3	0	0	0.76	12.5	76	334.286	2.9	15	127	84	36.8	1	0	1	0	0	1	1	1	NA	NA	NA	NA	NA	NA	1380	75.19	58.25	8.8	6.23	1.6	207	5.4	28.8	3.36038	0	14	NA	NA	NA	2
93585	1	34	4	1	2	2.81	15.4	67	199.167	0.2	13.3	108	60	18.7	1	0	0	0	0	0	0	0	0	0	0	0	0	0	1868	63.45	78.16	10.3	4.45	1.84	45.9	5.3	32.1	3.46886	0	NA	NA	NA	NA	1
93590	1	28	4	1	2	1.22	8.6	68	438.667	11.3	13.8	115	52	31.5	0	0	0	0	0	0	0	0	0	0	0	0	0	0	1738	61.7	78.46	11.65	4.89	1.42	104	5.6	16.5	2.80336	0	NA	NA	NA	NA	0
93600	1	22	3	0	1	3.01	6.6	70	344.348	0.08	14.3	99	54	18.9	1	1	0	0	0	0	0	0	0	0	0	0	0	0	1925	59.4	59.69	7.8	4.4	2.25	22.8	5.1	46.7	3.84374	63.2	NA	NA	NA	NA	1
93606	1	28	3	0	2	1.65	5	66	115.714	47.2	12.8	116	66	21.4	0	0	0	0	0	0	0	0	0	0	0	0	0	0	970	37.47	38.36	13.35	3.62	0.98	147	5.1	19.9	2.99072	0	NA	NA	NA	NA	0
93612	1	36	5	2	2	3.7	17.7	76	538.125	3.4	14	108	78	24.9	0	0	0	0	0	0	0	0	0	0	0	0	0	0	2271	67.44	87.76	31.7	4.76	1.16	168	5.6	26.8	3.2884	0	NA	NA	NA	NA	0
93661	1	27	2	2	2	0.74	7.5	71	707	24.7	13.1	109	63	41	0	0	0	0	0	0	0	0	0	0	0	0	0	0	737	14.8	25.68	9.8	3.57	1.09	47.5	6.1	55.1	4.00915	0	NA	NA	NA	NA	0
93665	1	34	3	0	2	4.12	10.4	74	440	0.4	13.6	127	79	24	0	1	0	0	0	0	0	0	0	0	0	0	0	0	1438	39.9	61.47	9.36	4.06	2.12	87.6	4.7	40.7	3.70623	8	NA	NA	NA	NA	0
93677	1	34	3	0	2	1.76	15.8	70	309.222	0.3	13.1	113	75	22.2	0	1	0	0	0	0	0	0	0	0	0	0	0	0	2047	66.58	76.95	7.72	4.6	1.63	54.2	5.2	32.2	3.47197	36	NA	NA	NA	NA	0
93682	1	41	5	2	2	5	14.9	76	564.533	2.8	13	126	81	20.9	0	0	0	0	0	0	0	0	0	0	0	0	0	0	1817	50.07	101.4	8.38	4.73	1.68	99.1	5.5	20.2	3.00568	0	NA	NA	NA	NA	0
93702	1	24	3	0	2	3.54	27.9	68	717.458	4.4	12.8	119	66	21.4	0	1	0	0	0	0	0	0	0	0	0	0	0	0	1083	56.4	42.88	6.88	4.14	1.89	57.7	4.6	24.2	3.18635	31.8	NA	NA	NA	NA	0
93705	1	66	4	1	0	0.82	16.8	73	381.706	2.72	11.9	200	68	31.7	1	0	0	1	0	0	0	0	0	0	0	0	0	0	1202	20.01	56.98	8.8	4.06	1.55	28.7	6.2	39.8	3.68387	0	NA	NA	NA	NA	2
93708	1	66	5	2	0	1.63	17.2	71	428.211	1.83	13.2	142	76	23.7	0	0	1	1	0	0	0	0	0	0	0	0	0	0	1251	50.96	65.49	11.49	5.4	2.28	109	6.2	30.1	3.40453	0	NA	NA	NA	NA	0
93709	1	75	4	1	2	0.41	11.8	70	576	6.94	15.4	119	67	38.9	1	0	0	1	1	0	0	0	0	0	0	0	0	0	1911	70.81	74.58	11.89	4.55	1.68	129	6.3	46.5	3.83945	0	NA	NA	NA	NA	1
93711	0	56	5	2	2	5	10.2	71	396	0.82	14.7	101	67	21.3	0	0	0	0	0	0	0	0	0	0	0	0	0	0	2840	101.33	124.24	17	6.15	1.86	40.6	5.7	34.8	3.54962	0	NA	NA	NA	NA	0
93713	0	67	3	0	1	2.65	14	64	373.966	1.66	14.2	105	72	23.5	1	0	0	0	0	0	0	0	0	0	0	0	0	0	2040	61.4	114.3	13.02	4.76	1.24	238	5.6	28	3.3322	0	NA	NA	NA	NA	1
93714	1	54	4	1	2	1.86	14.7	70	208.5	5.71	14.1	162	83	39.9	1	0	1	0	0	0	0	0	0	0	0	0	0	0	2493	104.1	143.18	12.98	5.95	1.09	86.5	12.7	28.7	3.3569	0	NA	NA	NA	NA	2
93715	0	71	5	2	1	1.56	14.7	66	1940.4	6.1	16	114	59	22.5	1	0	0	0	1	0	0	0	0	0	0	0	0	0	1287	40.2	53.11	4.92	4.65	1.47	222	6.2	39.5	3.6763	0	NA	NA	NA	NA	1
93716	0	61	5	2	2	5	16.8	75	268.632	1.75	15.7	121	72	30.7	1	0	0	0	0	0	0	0	0	0	0	0	0	0	2917	103.91	85.06	18.6	5.82	1.01	1320	5.6	33.7	3.5175	0	NA	NA	NA	NA	2
93717	0	22	3	0	1	1.49	19.9	76	392	0.8	14.4	119	65	24.5	1	0	0	0	0	0	0	0	0	0	0	0	0	0	3151	97.12	156.75	18.54	5.51	1.37	128	5.1	34.8	3.54962	0	NA	NA	NA	NA	1
93718	0	45	4	1	1	1.18	12.7	72	292.148	0.69	14.6	131	90	22	0	0	0	1	0	0	0	0	0	0	0	0	0	0	1911	70.81	74.58	11.89	3.93	1.63	101	5.7	34.7	3.54674	0	NA	NA	NA	NA	0
93721	1	60	1	2	0	3.04	13.6	76	206.034	3.04	14.9	136	67	35.9	0	0	0	0	0	0	0	0	0	0	0	0	0	0	1930	79.98	80.86	19.4	3.15	1.16	372	5.2	30.3	3.41115	0	NA	NA	NA	NA	0
93722	1	60	3	0	2	2.07	14.3	66	293.056	0.41	12.3	113	65	23.8	0	0	0	0	0	0	0	0	0	0	0	0	0	0	1009	22.69	32.58	10.14	4.76	2.02	42.7	5.8	29.4	3.38099	0	NA	NA	NA	NA	0
93723	0	64	3	0	2	3.69	16.8	67	317.143	1.02	14	124	76	22.4	0	0	1	0	0	0	0	0	0	0	0	0	0	0	1762	41.62	63.46	11.65	5.22	1.4	92.5	5.3	41.5	3.72569	0	NA	NA	NA	NA	0
93726	1	67	1	2	0	1.85	16.1	67	351	2.42	14.2	131	53	31.1	1	0	0	0	0	0	0	0	0	0	0	0	0	0	1692	81.89	71.93	12.43	4.55	0.91	157	5.8	26.9	3.29213	0	NA	NA	NA	NA	2
93727	0	70	5	2	2	5	14.3	71	342	2.01	13.3	166	87	23.9	1	0	0	0	0	1	NA	NA	NA	NA	NA	NA	NA	NA	2881	103.32	115.32	22.57	4.32	1.66	119	5.8	36.6	3.60005	0	13	NA	NA	NA	2
93728	0	53	4	1	2	5	5	74	500.786	39.78	12	124	75	33.4	0	1	0	1	0	0	0	0	0	0	0	0	0	0	2605	80	119.22	9.66	3.7	1.6	49.9	5.3	92.6	4.52829	55.7	NA	NA	NA	NA	0
93729	0	42	4	1	0	0.83	10	63	438.919	1.63	14.6	126	84	27.6	1	0	0	0	0	0	0	0	0	0	0	0	0	0	3274	99.17	120.32	45.2	4.27	1.27	123	5.3	32.8	3.49043	0	NA	NA	NA	NA	1
93731	0	20	1	2	2	5	28.5	75	640.636	0.75	17.3	109	56	27.6	0	0	0	0	0	0	0	0	0	0	0	0	0	0	2266	71.81	112.52	10.09	3.96	1.03	50.5	4.9	33	3.49651	0	NA	NA	NA	NA	0
93735	0	52	2	2	0	0.35	13.3	70	174.545	1.59	11.9	152	71	35.1	0	0	0	1	1	0	0	0	0	0	0	0	0	0	1412	62.08	64.66	8.17	3.13	1.09	1030	5	24.4	3.19458	0	NA	NA	NA	NA	0
93738	0	26	2	2	2	5	12.9	75	404.04	5.26	14.9	118	79	33.7	1	0	0	0	0	0	0	0	0	0	0	0	0	0	857	116.36	19.72	21.79	3.78	1.06	179	5.6	36.1	3.58629	0	NA	NA	NA	NA	2
93742	0	72	4	1	2	3.62	10.6	71	318.182	2.03	11.1	167	90	33.9	1	0	1	1	1	0	0	0	0	0	0	0	0	0	1779	111.22	57.17	16.71	4.14	1.24	62.5	5.5	50.2	3.91602	0	NA	NA	NA	NA	2
93743	0	61	3	0	0	3.87	16.7	75	367.5	0.5	14	153	85	22.5	1	0	0	1	0	0	0	0	0	0	0	0	0	0	5594	175.55	239.71	36.99	3.78	1.06	359	5.9	23.1	3.13983	0	NA	NA	NA	NA	1
93746	1	25	4	1	2	3.4	30.1	72	135	4.44	12.5	107	63	24.8	0	0	0	0	0	0	0	0	0	0	0	0	0	0	1544	80.67	39.47	21.94	4.53	1.84	66.1	5.7	19.7	2.98062	0	NA	NA	NA	NA	0
93752	1	73	3	0	2	3.98	18.4	68	392.214	0.64	14.7	128	61	25.5	1	0	0	0	0	0	0	0	0	0	0	0	0	0	749	31.26	26.2	7.85	6.78	1.55	34.4	5.3	41.1	3.71601	0	NA	NA	NA	NA	1
93754	0	72	2	2	1	0.82	13.8	72	273.308	1.21	16.5	116	80	33.4	1	0	0	1	0	0	0	0	0	0	0	0	0	0	2064	80.33	31.26	25.13	3.49	1.06	96.4	5.7	40.7	3.70623	0	NA	NA	NA	NA	2
93755	1	26	4	1	2	2.07	5.4	71	400.909	4.86	13	104	77	29.4	1	1	0	0	0	0	0	0	0	0	0	0	0	0	2693	100.01	126.22	10.32	4.71	1.24	11	5.7	51.2	3.93574	4.7	NA	NA	NA	NA	2
93757	0	63	3	0	2	2.59	23.5	71	625.692	4.14	15.6	149	83	34.9	1	1	0	0	0	0	0	0	0	0	0	0	0	0	1609	74.85	85.75	7.25	5.28	1.24	643	5.7	27.1	3.29953	14.9	NA	NA	NA	NA	1
93758	1	55	3	0	0	0.75	13.3	71	2438	4.81	12.9	149	77	30.8	1	0	1	1	1	1	NA	NA	NA	NA	NA	NA	NA	NA	1448	83.39	75.83	10.07	11.53	1.27	83.2	6.5	45.5	3.81771	0	24	NA	NA	NA	1
93761	0	44	5	2	2	1	14.1	70	3200.08	1.64	16.6	131	91	29	1	0	0	0	0	0	0	0	0	0	0	0	0	0	1722	57.41	62.63	10.48	5.04	1.37	67.7	5.8	47.7	3.86493	0	NA	NA	NA	NA	1
93762	1	74	1	2	1	1	17.2	69	299.636	0.52	14.8	128	63	27.1	0	0	1	0	0	0	0	0	0	0	0	0	0	0	2106	38.32	97.4	11.43	7.16	1.5	177	6.7	43.1	3.76352	0	NA	NA	NA	NA	0
93763	0	40	3	0	1	3.25	9	70	312	2.69	15.7	122	86	25.5	1	0	0	1	0	0	0	0	0	0	0	0	0	0	2615	99.57	107.82	17.62	5.77	0.85	170	5.3	46.8	3.84588	0	NA	NA	NA	NA	2
93766	1	36	2	2	0	0.52	16.7	66	268.571	0.67	12.8	150	107	27.1	0	0	1	1	0	0	0	0	0	0	0	0	0	0	1341	39.84	55.48	7.46	6.57	1.29	14.9	5.7	36.1	3.58629	0	NA	NA	NA	NA	0
93767	0	61	2	2	2	1.18	15.2	66	722.909	1.38	13.1	121	65	31.9	1	1	1	1	0	0	0	0	0	0	0	0	0	0	1742	68.92	32.09	12.91	4.94	1.03	86.5	7.5	17.9	2.8848	11.2	NA	NA	NA	NA	2
93768	0	80	3	0	1	3.04	12	69	581.875	1.06	14.2	126	70	25.7	1	0	1	0	1	0	0	0	0	0	0	0	0	0	1404	54.11	59.75	20.89	4.06	1.16	46	6.7	42.6	3.75185	0	NA	NA	NA	NA	2
93770	0	55	2	2	0	0.8	16.1	82	504.643	35.2	14.1	129	65	26	1	0	0	0	0	0	0	0	0	0	0	0	0	0	3436	169.67	122.59	21.59	3.88	1.14	111	5.5	61.4	4.11741	0	NA	NA	NA	NA	1
93772	1	55	4	1	1	0.7	7.9	75	514.222	1.06	9.9	122	63	30.7	0	0	0	1	1	1	NA	NA	NA	NA	NA	NA	NA	NA	891	42.42	48.47	6.68	2.53	1.06	122	5.5	67.6	4.21361	0	39	NA	NA	NA	0
93773	0	69	3	0	2	0.39	21	68	383.167	0.49	15.8	123	78	24.1	1	0	0	0	0	0	0	0	0	0	0	0	0	0	1911	70.81	74.58	11.89	3.78	1.53	124	4.9	29	3.3673	0	NA	NA	NA	NA	2
93774	1	41	3	0	2	3.67	14.3	74	621.818	3.67	13.9	118	75	25.9	0	0	0	0	0	0	0	0	0	0	0	0	0	0	1911	70.81	74.58	11.89	5.17	1.4	35.3	5.5	28.8	3.36038	0	NA	NA	NA	NA	0
93775	1	47	5	2	2	3.73	8.6	71	730.522	1.95	12.9	111	74	25.9	1	0	0	0	0	0	0	0	0	0	0	0	0	0	1353	70	56.4	9.65	4.32	1.81	7.46	5.4	38.5	3.65066	0	NA	NA	NA	NA	2
93776	1	32	4	1	1	1.18	22	72	612.588	1.2	14.5	120	77	22.2	0	0	0	1	0	0	0	0	0	0	0	0	0	0	1149	59.93	49.59	6.62	5.07	2.3	154	5.5	25.7	3.24649	0	NA	NA	NA	NA	0
93780	1	46	5	2	1	1.22	18.6	74	702	14.37	14.9	131	88	33.5	1	0	0	1	1	1	1	NA	1	NA	NA	NA	NA	NA	1963	50.35	81.36	16.55	4.84	1.19	24.8	5.3	46.4	3.8373	0	15	NA	NA	NA	2
93781	0	32	2	2	0	1.65	16.8	72	551.864	0.65	13.5	122	72	25.4	0	0	0	0	0	0	0	0	0	0	0	0	0	0	1911	70.81	74.58	11.89	4.45	1.11	155	5.4	25.5	3.23868	0	NA	NA	NA	NA	0
93782	1	25	4	1	2	4.65	12	72	423.438	0.46	14	95	54	24	0	0	0	0	0	0	0	0	0	0	0	0	0	0	1261	48.31	48.72	8.66	3.62	0.96	59.1	5.3	33	3.49651	0	NA	NA	NA	NA	0
93783	1	21	2	2	1	0.41	6.1	71	452.833	0.97	13.2	104	64	24.3	0	0	0	0	0	0	0	0	0	0	0	0	0	0	1786	86.3	82.36	9.25	4.58	1.4	7.69	5.7	54.4	3.99636	0	NA	NA	NA	NA	0
93785	1	80	3	0	2	5	13.3	63	533.176	0.92	12.4	168	27	30.7	0	1	0	1	0	0	0	0	0	0	0	0	0	0	2089	58.56	106.81	11.07	4.76	1.84	48.8	5.6	33.4	3.50856	17	NA	NA	NA	NA	0
93788	1	66	3	0	2	5	9.7	74	751.059	5.31	12.5	119	57	39.3	1	0	1	1	0	0	0	0	0	0	0	0	0	0	962	52.45	36.99	6.84	5.09	0.83	40.8	9.5	61.8	4.1239	0	NA	NA	NA	NA	2
93789	1	34	3	0	2	5	27	72	365	0.79	14.6	105	59	23.6	0	1	0	0	0	0	0	0	0	0	0	0	0	0	1949	79.09	68.22	11.77	4.81	2.43	29	4.9	38.2	3.64284	30.9	NA	NA	NA	NA	0
93791	0	20	5	2	2	2.94	17.2	78	575.857	1.11	14.8	133	95	36.9	0	0	0	0	0	0	0	0	0	0	0	0	0	0	2324	136.93	125.83	11.98	5.92	0.98	332	5.1	46.4	3.8373	0	NA	NA	NA	NA	0
93794	1	62	5	2	2	4.81	16.3	74	470.556	1.96	12.7	136	81	23.9	0	0	0	1	0	0	0	0	0	0	0	0	0	0	1397	48.83	59.04	9.47	6.15	1.71	192	5.9	22.5	3.11352	0	NA	NA	NA	NA	0
93795	0	64	4	1	0	2.43	32.4	70	123.697	0.17	15.4	143	88	15.7	1	0	0	0	0	0	0	0	0	0	0	0	0	0	947	52.1	35.09	8.43	3.41	1.58	897	5.6	22.8	3.12676	0	NA	NA	NA	NA	1
93796	0	71	3	0	1	1.44	16.1	71	715.846	4	14.3	117	54	31.2	1	0	0	1	0	0	0	0	0	0	0	0	0	0	1911	70.81	74.58	11.89	4.99	1.27	174	5.1	38.7	3.65584	0	NA	NA	NA	NA	2
93797	1	52	3	0	2	4.93	15.9	72	1071.47	1.49	14.9	115	77	32	0	0	0	1	0	0	0	0	0	0	0	0	0	0	1911	70.81	74.58	11.89	4.73	1.53	68.3	5.8	27.6	3.31782	0	NA	NA	NA	NA	0
93800	1	80	3	0	2	2.8	18.6	66	964.364	0.79	14	153	72	22.7	1	0	0	1	0	1	NA	NA	NA	NA	NA	NA	NA	NA	1699	43.28	74.44	6.72	5.25	2.4	118	5.2	32.1	3.46886	0	39	NA	NA	NA	2
93801	0	59	2	2	2	5	19.3	70	228.529	3.67	14.3	115	71	24.7	0	1	1	1	0	0	0	0	0	0	0	0	0	0	2574	114.31	106.62	26.17	4.03	0.91	182	6.2	21.9	3.08649	22.3	NA	NA	NA	NA	0
93805	1	64	3	0	2	5	13.1	64	330	2.88	13.1	129	78	33.9	1	0	0	1	0	1	1	NA	NA	NA	1	NA	NA	NA	1145	82.66	35.55	8.56	4.68	1.06	75	5.5	40.2	3.69387	0	38	NA	NA	NA	2
93806	0	44	5	2	2	1.35	14.5	78	966.391	1.67	16.5	103	74	28.4	1	0	0	0	0	0	0	0	0	0	0	0	0	0	2064	86.21	63.15	14.5	6.31	0.91	104	5.7	30	3.4012	0	NA	NA	NA	NA	1
93811	0	24	5	2	2	2.94	21.9	75	818.4	1.51	15	104	75	29.5	1	1	0	0	0	0	0	0	0	0	0	0	0	0	2683	76.93	97.71	12.86	4.5	1.11	302	5.3	31.6	3.45316	37.3	NA	NA	NA	NA	1
93812	0	67	3	0	2	5	17	66	585.733	0.99	15.1	143	95	31.1	1	0	1	1	1	0	0	0	0	0	0	0	0	0	3670	156.83	140.11	25.63	3.47	0.75	167	7.1	43.8	3.77963	0	NA	NA	NA	NA	2
93813	1	42	1	2	0	1.11	9.7	69	1348.9	30.31	13.3	137	93	43.2	0	0	0	0	0	0	0	0	0	0	0	0	0	0	400	18.02	20.25	3.46	5.46	1.4	103	5.3	36.7	3.60278	0	NA	NA	NA	NA	0
93814	1	41	4	1	2	5	8.1	73	558.105	0.86	10.1	104	77	27.8	0	1	0	0	0	0	0	0	0	0	0	0	0	0	2055	104.24	75.9	22.56	3.44	1.29	18.5	4.6	139	4.93447	18.5	NA	NA	NA	NA	0
93815	1	32	5	2	2	1.12	10.7	77	648	0.78	12.9	107	69	28	0	1	0	0	0	0	0	0	0	0	0	0	0	0	720	20.08	27.21	3.35	5.04	0.83	36.3	5.4	33.3	3.50556	0.8	NA	NA	NA	NA	0
93817	0	55	5	2	2	5	29.7	74	624	0.45	14.8	125	91	24.3	0	1	1	1	0	0	0	0	0	0	0	0	0	0	975	66.67	36.35	16.04	3.75	1.09	552	5.8	31.2	3.44042	14	NA	NA	NA	NA	0
93819	1	63	4	1	1	0.9	9.3	77	188.289	4.64	12	127	73	27.9	0	0	0	0	0	0	0	0	0	0	0	0	0	0	849	15.67	19.71	3.62	6.36	2.17	42.2	6	52.2	3.95508	0	NA	NA	NA	NA	0
93825	0	74	3	0	0	1.82	15.4	65	470.214	0.77	14.7	151	73	30.5	1	0	0	0	0	0	0	0	0	0	0	0	0	0	1815	80.11	90.26	12.13	4.06	1.19	97.1	5.4	34.8	3.54962	0	NA	NA	NA	NA	2
93829	1	38	4	1	2	5	19.7	66	836.267	7.87	12.4	117	76	31.7	0	0	0	1	0	0	0	0	0	0	0	0	0	0	1637	37.22	45.34	14.69	4.4	1.6	58.3	5.6	30.7	3.42426	0	NA	NA	NA	NA	0
93830	0	67	4	1	2	5	14.7	77	218.667	5.62	9.8	152	67	32.2	1	0	1	1	1	0	0	0	0	0	0	0	0	0	2197	59.47	139.83	10.61	4.65	2.28	1750	6.2	25	3.21888	0	NA	NA	NA	NA	2
93831	0	61	2	2	0	2.08	15	72	591.714	8.18	15.4	141	74	25.3	1	0	1	1	0	0	0	0	0	0	0	0	0	0	3226	161.26	179.8	14.86	4.91	1.32	220	6.5	31.5	3.44999	0	NA	NA	NA	NA	2
93832	0	63	5	2	2	5	26.7	72	523.556	0.47	14.5	133	38	27	0	1	0	1	0	0	0	0	0	0	0	0	0	0	2618	69.5	114.11	12.87	3.83	1.34	33.8	5.4	42.4	3.74715	55.7	NA	NA	NA	NA	0
93834	1	48	3	0	0	0.28	9.5	72	379.167	29	14	142	79	36.5	1	0	1	1	0	0	0	0	0	0	0	0	0	0	533	16.41	17.17	3.71	6.9	0.8	125	11.5	45.2	3.8111	0	NA	NA	NA	NA	2
93837	1	35	3	0	1	1.03	12.5	68	665	4	12.6	119	73	39.1	1	0	0	0	0	0	0	0	0	0	0	0	0	0	1370	38.8	60.15	7.26	4.01	1.06	127	5.2	22.7	3.12236	0	NA	NA	NA	NA	1
93840	0	47	5	2	2	5	22.7	69	391.5	0.66	16	116	85	24	1	1	0	0	0	0	0	0	0	0	0	0	0	0	1941	102.15	59.27	15.61	4.29	1.34	219	5.1	30.8	3.42751	19.9	NA	NA	NA	NA	1
93841	1	48	5	2	2	5	14.5	77	366.6	3.19	14.3	112	80	32.8	1	0	0	0	0	0	0	0	0	0	0	0	0	0	1671	54.94	98.96	8.68	5.61	1.73	101	5.7	47.1	3.85227	0	NA	NA	NA	NA	1
93843	1	42	2	2	2	5	9.1	70	870.625	0.55	13.5	92	56	21	0	0	0	0	0	0	0	0	0	0	0	0	0	0	2150	171.76	85.03	12.92	5.28	2.28	17	5.4	44.1	3.78646	0	NA	NA	NA	NA	0
93845	1	28	3	0	1	1.93	20.1	78	357.955	1.24	14.6	106	81	24.8	1	0	0	0	0	0	0	0	0	0	0	0	0	0	2298	52.03	85.62	11.52	4.63	1.4	139	5.2	22.3	3.10459	0	NA	NA	NA	NA	1
93846	1	29	4	1	2	0.87	3.6	72	448.8	0.27	8.9	105	62	19.8	0	0	0	0	0	0	0	0	0	0	0	0	0	0	1783	88	84.27	11.9	2.95	1.68	5.6	5.8	139	4.93447	0	NA	NA	NA	NA	0
93847	1	43	1	2	0	0.1	10.6	73	281.3	3.44	12.9	112	61	40.9	0	0	0	0	0	0	0	0	0	0	0	0	0	0	1535	84.37	67.88	7.17	3.21	1.4	11	5.8	35.6	3.57235	0	NA	NA	NA	NA	0
93848	0	62	4	1	1	1.08	13.6	69	279	0.47	14.3	119	79	29	0	0	0	0	0	0	0	0	0	0	0	0	0	0	5709	117.68	286.61	22.24	4.91	1.68	131	6.3	41.5	3.72569	0	NA	NA	NA	NA	0
93849	1	40	3	0	2	5	33.5	66	260	8.89	12.4	109	72	22.7	1	1	0	0	0	0	0	0	0	0	0	0	0	0	3121	96.77	152.83	15.68	3.96	1.22	37.8	5.2	23.8	3.16969	44.6	NA	NA	NA	NA	2
93850	1	74	4	1	1	4.86	14.9	84	270.455	3.44	13.5	142	66	27	0	0	0	1	0	0	0	0	0	0	0	0	0	0	2096	100.56	77.78	13.09	5.15	1.68	116	6.1	28.1	3.33577	0	NA	NA	NA	NA	0
93851	1	74	3	0	1	5	11.6	63	289.143	0.93	12.7	127	58	31.2	0	0	0	1	1	0	0	0	0	0	0	0	0	0	1293	27.3	44.07	9.28	3.39	1.16	125	5.3	33.2	3.50255	0	NA	NA	NA	NA	0
93852	1	45	5	2	2	2.9	3.8	70	467.586	3.74	9.4	126	79	27.2	0	1	0	1	0	1	1	NA	NA	NA	1	NA	NA	NA	1321	63.05	48.27	2.84	4.58	1.81	6.54	5.3	106	4.66344	27.2	38	NA	NA	NA	0
93853	0	50	1	2	0	0.4	19.5	86	591.158	10.24	13.4	98	70	26	1	0	0	0	0	0	0	0	0	0	0	0	0	0	1987	72.57	54.54	13.45	3.7	0.98	290	6.1	31.5	3.44999	0	NA	NA	NA	NA	2
93855	0	71	3	0	2	4.12	15.8	72	600	2.35	15.9	129	71	35.6	0	1	0	1	0	0	0	0	0	0	0	0	0	0	1979	76.99	78.58	8	3.83	1.11	69.4	5.7	51.7	3.94546	14	NA	NA	NA	NA	0
93856	0	66	4	1	2	2.39	15.8	72	404.143	1.21	14.2	128	69	42.8	1	1	0	1	1	0	0	0	0	0	0	0	0	0	2283	61.81	90.81	14.4	5.15	1.4	114	6	32.2	3.47197	37	NA	NA	NA	NA	2
93861	0	76	3	0	0	3.8	19.9	69	362.952	0.5	15.1	137	76	31.6	1	0	0	0	0	1	NA	NA	NA	NA	NA	NA	NA	NA	1911	70.81	74.58	11.89	4.91	1.03	133	5.3	34.1	3.5293	0	32	NA	NA	NA	2
93869	0	80	3	0	2	1.49	18.6	81	1210.3	5.37	12.9	125	74	22.9	1	0	1	0	1	0	0	0	0	0	0	0	0	0	1911	70.81	74.58	11.89	4.34	1.24	261	9.3	41.3	3.72086	0	NA	NA	NA	NA	2
93870	1	20	3	0	2	3.79	27.6	68	208.353	0.3	13.8	98	55	19	0	0	0	0	0	0	0	0	0	0	0	0	0	0	1659	52.66	65.55	19.07	4.03	1.6	45.4	5	26.9	3.29213	0	NA	NA	NA	NA	0
93871	1	55	1	2	0	0.67	12.4	78	245	0.51	14	149	95	21.4	1	1	0	0	0	0	0	0	0	0	0	0	0	0	1868	85.78	72.33	8.91	6.18	2.3	117	5.3	31.9	3.46261	15.9	NA	NA	NA	NA	1
93875	0	37	4	1	0	0.58	15.8	64	498.882	3.14	14.5	131	95	24.9	0	1	0	0	0	0	0	0	0	0	0	0	0	0	4401	182.88	224.88	22.32	5.64	1.71	240	5.8	25.3	3.2308	14	NA	NA	NA	NA	0
93877	0	64	3	0	1	2.6	27.2	63	618.857	1.81	16.5	109	73	24.7	0	1	0	0	0	1	NA	NA	NA	NA	NA	NA	NA	NA	3757	100.02	158.03	15.71	5.43	1.03	91.9	5.6	34.7	3.54674	18.7	39	37	NA	NA	0
93878	1	59	4	1	1	0.79	16.3	71	308.923	0.62	12	111	62	24.1	1	0	0	0	0	0	0	0	0	0	0	0	0	0	1401	40.3	57.01	5.59	5.35	1.73	228	5.2	35.2	3.56105	0	NA	NA	NA	NA	2
93887	0	63	3	0	2	1.4	13.6	69	374.833	0.62	13.3	134	78	25.8	1	0	1	1	1	0	0	0	0	0	0	0	0	0	1230	41.27	55.03	5.48	4.11	1.14	122	6.9	29.1	3.37074	0	NA	NA	NA	NA	2
93888	1	37	3	0	2	3.21	18.8	70	555.385	0.37	13.5	96	66	21.3	0	0	0	0	0	0	0	0	0	0	0	0	0	0	1359	56.56	71.48	9.31	5.48	2.07	104	5.3	30.7	3.42426	0	NA	NA	NA	NA	0
93890	0	27	5	2	2	3.4	9.5	69	148.781	1.91	14.8	115	75	23.8	0	1	0	0	0	0	0	0	0	0	0	0	0	0	2140	89.44	94.96	13.58	5.38	1.37	192	5.4	40.7	3.70623	37.4	NA	NA	NA	NA	0
93892	1	80	3	0	1	1.65	9.3	73	590	5.69	14.2	115	53	35.9	0	0	1	1	1	0	0	0	0	0	0	0	0	0	1401	69.13	40.46	17.99	6.39	1.47	71.4	6.9	41.9	3.73529	0	NA	NA	NA	NA	0
93893	0	55	4	1	2	3.79	15	69	282.571	1.74	13.6	157	101	28.2	1	1	0	1	1	0	0	0	0	0	0	0	0	0	2607	100.64	113.18	12.16	4.97	1.37	128	5.6	75	4.31749	11.2	NA	NA	NA	NA	1
93895	0	40	3	0	2	5	8.6	74	276	8.34	14.5	122	86	34.1	1	1	0	1	0	0	0	0	0	0	0	0	0	0	3440	99.9	153.42	14.51	6.05	1.24	239	5.2	55.3	4.01277	27.7	NA	NA	NA	NA	2
93899	0	67	3	0	0	1.79	14.5	73	738	11.4	15.8	132	77	30	1	0	0	1	0	0	0	0	0	0	0	0	0	0	2402	80.75	120.93	10.03	5.51	0.91	164	5.5	42.7	3.7542	0	NA	NA	NA	NA	1
93900	0	48	1	2	0	1.29	14.3	71	1107	2.01	14.3	107	79	30.9	1	1	0	0	0	1	NA	NA	NA	NA	NA	NA	NA	NA	2663	101.88	98.07	17.12	6.18	1.29	284	6.6	21.8	3.08191	12.3	20	37	NA	NA	2
93903	0	62	3	0	1	1.4	15.8	69	169.5	5.74	13.4	139	73	32.2	1	1	1	1	1	0	0	0	0	0	0	0	0	0	2341	97.85	101.76	17.2	3.9	0.75	73.8	7.1	40.7	3.70623	14	NA	NA	NA	NA	2
93906	0	39	1	2	0	4.07	24	72	516.267	1	14.8	119	78	29.1	1	0	0	0	0	0	0	0	0	0	0	0	0	0	3584	119.48	155.58	27.12	5.28	1.37	168	5.3	30.7	3.42426	0	NA	NA	NA	NA	2
93907	1	41	4	1	1	2.49	14	78	869.762	2.92	10.9	125	81	26.7	0	0	0	0	0	0	0	0	0	0	0	0	0	0	1819	55.65	58.14	9.51	3.83	0.88	22.2	5	38.4	3.64806	0	NA	NA	NA	NA	0
93909	0	41	5	2	2	5	13.8	71	473.857	1.01	15.4	119	77	24.8	0	0	0	0	0	0	0	0	0	0	0	0	0	0	2947	70.15	79.18	20.84	5.69	0.88	112	5.4	31.2	3.44042	0	NA	NA	NA	NA	0
93914	0	41	5	2	2	5	9.9	76	395.63	5.25	13.9	109	61	34.6	0	0	0	0	0	0	0	0	0	0	0	0	0	0	1899	188.95	76.85	12.76	4.09	0.98	244	5.9	40	3.68888	0	NA	NA	NA	NA	0
93915	0	34	3	0	1	5	7.3	70	671.143	6.93	16.2	106	78	24.3	1	0	0	0	0	0	0	0	0	0	0	0	0	0	1284	8.63	5	3.54	4.32	0.91	214	5.3	31.5	3.44999	0	NA	NA	NA	NA	1
93918	0	36	3	0	1	1.63	25.6	71	304.8	1.68	14.9	120	79	30.8	1	1	0	0	1	0	0	0	0	0	0	0	0	0	2785	114.1	151.97	17.65	5.22	1.29	219	5.8	21.8	3.08191	41.6	NA	NA	NA	NA	2
93920	1	61	5	2	2	5	22.4	68	215	0.32	13.6	109	72	20.9	0	0	0	0	0	0	0	0	0	0	0	0	0	0	1567	70.88	52.82	10.87	4.97	1.73	117	5.8	25.3	3.2308	0	NA	NA	NA	NA	0
93924	1	70	3	0	2	1.08	21.3	67	256.286	0.5	13	177	88	25.6	1	0	1	1	1	0	0	0	0	0	0	0	0	0	879	34.7	31.24	9.43	5.38	2.4	57.3	5.8	37.8	3.63231	0	NA	NA	NA	NA	1
93926	0	31	5	2	1	2.03	12	69	546	3.28	14.2	109	67	36.1	0	0	0	0	0	0	0	0	0	0	0	0	0	0	2641	107.72	143.75	16.83	4.58	1.06	181	5.3	21.2	3.054	0	NA	NA	NA	NA	0
93927	1	54	3	0	0	1	17.4	73	477.176	1.15	14.1	122	76	24.5	1	0	0	0	0	0	0	0	0	0	0	0	0	0	1315	33.62	51.7	21.34	6.21	1.86	128	5.6	24.3	3.19048	0	NA	NA	NA	NA	1
93931	0	24	5	2	0	1.21	16.5	78	478.429	9.04	15.8	127	87	35.2	0	0	0	0	0	0	0	0	0	0	0	0	0	0	2394	134.36	91.51	13.82	4.29	1.01	88.9	5.1	38.6	3.65325	0	NA	NA	NA	NA	0
93932	1	54	5	2	2	5	18.4	72	268.8	2.14	13.6	126	66	31.3	0	0	0	1	0	1	1	1	NA	NA	NA	NA	NA	NA	1678	60.97	71.18	9.11	6.23	1.37	262	6.2	31.4	3.44681	0	14	NA	NA	NA	0
93935	0	39	1	2	0	0.29	16.5	67	570.143	1.09	14.6	122	72	28.7	1	1	0	0	0	0	0	0	0	0	0	0	0	0	3146	157.01	121.48	15.67	4.76	0.96	173	5.9	20.8	3.03495	20.5	NA	NA	NA	NA	1
93937	0	30	3	0	2	3.94	17.9	74	346.923	3.74	15.8	122	73	32.6	1	1	0	0	0	0	0	0	0	0	0	0	0	0	3156	90.03	109.81	15.76	6.31	1.06	162	5.4	35.8	3.57795	56.2	NA	NA	NA	NA	2
93939	1	40	4	1	2	2.97	10.7	73	764.667	12.43	11.4	116	68	28.8	0	0	0	1	0	0	0	0	0	0	0	0	0	0	1012	27.17	27.95	8.17	4.42	1.14	59.7	5.8	67.3	4.20916	0	NA	NA	NA	NA	0
93940	0	50	3	0	1	3.79	27.4	72	329.12	0.71	17.6	116	75	24.8	0	0	0	0	0	0	0	0	0	0	0	0	0	0	1339	32.94	48.96	5.68	7.6	1.09	273	5.4	35.5	3.56953	0	NA	NA	NA	NA	0
93941	0	42	5	2	2	3.21	13.6	74	497.455	0.47	15	109	77	28.3	0	0	0	0	0	0	0	0	0	0	0	0	0	0	2982	118.74	182.7	38.46	5.51	1.42	315	5.6	33.6	3.51453	0	NA	NA	NA	NA	0
93942	1	52	3	0	2	5	4.1	69	452.4	0.93	9.8	122	72	34	0	0	0	0	0	0	0	0	0	0	0	0	0	0	1911	70.81	74.58	11.89	4.06	1.01	3.84	6	81.4	4.39938	0	NA	NA	NA	NA	0
93945	0	66	4	1	0	1.4	24.5	70	572.7	0.91	14.1	115	63	23.2	0	0	0	0	0	0	0	0	0	0	0	0	0	0	3369	117	182.77	17.32	5.43	2.2	224	4.7	31.4	3.44681	0	NA	NA	NA	NA	0
93946	0	22	1	2	1	1.88	35.1	75	608	0.86	15.5	136	76	21.7	0	0	0	0	0	0	0	0	0	0	0	0	0	0	1911	70.81	74.58	11.89	5.12	1.19	109	5.6	19.4	2.96527	0	NA	NA	NA	NA	0
93947	1	53	5	2	2	2.46	20.2	73	309.4	0.98	14.7	135	81	25.7	0	1	0	1	0	0	0	0	0	0	0	0	0	0	1983	86.1	93.16	12.01	6.57	2.33	180	5.2	31.3	3.44362	26.2	NA	NA	NA	NA	0
93949	1	49	5	2	2	5	17.7	70	422.609	0.83	14.9	128	73	24.6	0	0	1	0	0	0	0	0	0	0	0	0	0	0	1993	128.73	62.51	11.89	5.09	1.03	264	8	23.4	3.15274	0	NA	NA	NA	NA	0
93950	0	30	2	2	1	3.32	12.4	78	399	4.88	15.1	117	79	34.9	1	1	0	0	0	0	0	0	0	0	0	0	0	0	2204	103.28	71.5	15.96	5.02	1.11	116	5.6	23.6	3.16125	14	NA	NA	NA	NA	1
93953	0	26	5	2	1	2.04	14	81	988.88	12.83	15.6	138	66	40.2	0	0	0	0	0	0	0	0	0	0	0	0	0	0	2098	59.63	28.69	9.89	5.09	0.85	936	9.7	41.7	3.7305	0	NA	NA	NA	NA	0
93955	1	66	1	2	1	0.91	7.3	67	458.25	10.42	9.3	122	72	28.7	1	0	1	1	0	0	0	0	0	0	0	0	0	0	1232	30.04	61.57	6.45	4.5	1.34	75.2	7.4	51.3	3.93769	0	NA	NA	NA	NA	1
93957	1	41	3	0	2	1.99	9.1	70	215.556	3.76	13.3	109	77	29.1	0	1	0	1	0	1	NA	NA	NA	NA	NA	NA	NA	NA	2030	52.05	80.01	6.99	5.61	0.93	23.8	5.9	44.1	3.78646	21.6	37	NA	NA	NA	0
93959	1	61	4	1	2	1.52	14.7	68	310.5	4.8	14.9	143	92	25.5	0	0	0	1	0	0	0	0	0	0	0	0	0	0	3622	133.06	153.88	11.02	6.78	2.02	111	5.8	39.5	3.6763	0	NA	NA	NA	NA	0
93960	0	60	4	1	2	0.85	14.9	66	385.435	5.82	15.8	121	78	41.3	0	0	0	1	1	0	0	0	0	0	0	0	0	0	1797	87.55	108.75	11.24	2.92	1.11	133	6.9	45.5	3.81771	0	NA	NA	NA	NA	0
93963	0	80	3	0	0	2.07	16.3	69	246.4	1.36	12.4	136	71	32.9	1	1	0	1	0	1	NA	NA	NA	NA	NA	NA	NA	NA	2723	82.02	146.27	12.25	3.26	1.71	485	6.1	23	3.13549	12.7	16	NA	NA	NA	2
93964	0	52	5	2	2	4.81	18.3	76	370.875	2.09	11.5	114	66	28.9	1	0	0	1	0	0	0	0	0	0	0	0	0	0	2229	93.15	133.49	18.1	4.71	1.09	102	6.4	58.9	4.07584	0	NA	NA	NA	NA	2
93965	1	30	2	2	2	4.25	25.6	74	361.143	3.65	12.8	103	65	22.6	0	1	0	0	0	0	0	0	0	0	0	0	0	0	1635	71.47	81.25	9.63	5.92	1.86	44	5.2	35.3	3.56388	23.2	NA	NA	NA	NA	0
93968	0	57	4	1	0	2.99	15.4	88	317.143	1.35	13.7	183	93	26.1	1	1	0	1	0	0	0	0	0	0	0	0	0	0	1406	34.39	28.7	6.58	5.33	1.47	267	6	23.8	3.16969	42.1	NA	NA	NA	NA	1
93969	1	33	3	0	2	0.6	18.8	68	488.053	0.68	12.5	122	72	22.4	0	0	0	0	0	0	0	0	0	0	0	0	0	0	1286	43.42	67.09	5.94	4.65	1.29	42.4	5.1	35.4	3.56671	0	NA	NA	NA	NA	0
93970	0	33	5	2	2	3.66	16.7	73	403	0.93	15.7	112	77	25.1	0	0	0	0	0	0	0	0	0	0	0	0	0	0	2629	168.92	107.78	19.64	4.63	1.19	665	5.2	27.3	3.30689	0	NA	NA	NA	NA	0
93971	0	40	4	1	2	3.82	10.6	74	154	2.04	13.5	109	71	38.2	0	0	0	0	0	0	0	0	0	0	0	0	0	0	3868	58.05	183.51	15.08	6.05	1.29	15.8	5.9	67	4.20469	0	NA	NA	NA	NA	0
93972	0	35	3	0	2	3.92	20.8	78	409.059	1.37	15.1	125	83	29.6	1	1	0	0	0	0	0	0	0	0	0	0	0	0	4343	167.9	161.8	27	3.78	1.55	28.6	5	44.5	3.79549	116.9	NA	NA	NA	NA	1
93974	0	59	3	0	2	1.66	19.2	65	485.647	1.57	16.4	127	86	29.3	0	0	0	0	0	0	0	0	0	0	0	0	0	0	3486	187.54	137.41	28.68	4.22	1.01	297	5.1	33.6	3.51453	0	NA	NA	NA	NA	0
93975	1	54	3	0	1	1.68	13.8	70	674.8	12.22	13.6	120	70	27.2	0	0	0	0	0	0	0	0	0	0	0	0	0	0	2025	75.04	109.28	24.35	5.09	1.84	15	5.8	34.9	3.55249	0	NA	NA	NA	NA	0
93978	0	57	5	2	1	0.19	30.3	72	336	0.72	14.6	165	93	21.2	1	0	0	0	0	0	0	0	0	0	0	0	0	0	1911	70.81	74.58	11.89	5.9	1.42	362	5.3	31.7	3.45632	0	NA	NA	NA	NA	2
93980	1	29	3	0	2	5	23.8	70	214.189	0.67	14.1	122	72	19.2	0	1	0	0	0	0	0	0	0	0	0	0	0	0	2362	61.63	63.22	13.17	4.76	1.6	74.3	4.8	34.1	3.5293	74.9	NA	NA	NA	NA	0
93982	1	57	3	0	2	0	27.9	62	468.333	0.42	14.7	99	61	20.5	0	1	0	0	0	0	0	0	0	0	0	0	0	0	2758	61.71	157.62	16.54	4.78	2.07	26.1	5.3	30.2	3.40784	33.4	NA	NA	NA	NA	0
93983	1	75	5	2	1	3.08	16.8	73	257.103	1.2	14.2	146	67	32.6	0	0	1	1	0	0	0	0	0	0	0	0	0	0	2759	126.82	125.46	18.67	5.69	1.58	154	5.9	39.1	3.66612	0	NA	NA	NA	NA	0
93984	1	32	3	0	2	2.79	15.2	66	679.167	0.78	14.2	126	85	31.7	0	0	0	0	0	0	0	0	0	0	0	0	0	0	2093	118.06	99.33	20.51	3.75	1.01	45.8	4.5	46.3	3.83514	0	NA	NA	NA	NA	0
93987	0	35	1	2	0	1.16	15	66	313.097	0.46	17.3	123	80	39.2	1	1	0	0	0	0	0	0	0	0	0	0	0	0	2154	76.82	71.61	23.17	5.02	0.83	126	5.4	32.7	3.48738	18.7	NA	NA	NA	NA	1
93988	1	32	3	0	1	0.65	17.9	66	284.167	0.76	12.9	111	57	18.3	0	0	0	0	0	0	0	0	0	0	0	0	0	0	2120	58.55	72.36	11.79	3.52	1.66	20.2	5.1	40.7	3.70623	0	NA	NA	NA	NA	0
93989	1	39	3	0	2	5	17.7	78	374.4	0.99	13.7	107	71	21.4	1	1	0	0	0	0	0	0	0	0	0	0	0	0	4076	84.2	145.4	25.19	4.71	1.55	57.7	5.1	34.7	3.54674	86	NA	NA	NA	NA	2
93990	1	64	3	0	2	1.85	16.5	73	553.5	12.06	13.2	109	65	37.3	1	0	0	0	0	0	0	0	0	0	0	0	0	0	1925	74.72	87	11.13	7.27	2.12	73.5	5.5	31.5	3.44999	0	NA	NA	NA	NA	2
93998	1	24	3	0	1	1.83	13.6	75	342.957	0.34	13.4	103	65	20.3	0	0	0	0	0	0	0	0	0	0	0	0	0	0	2044	123.36	120.25	11.97	3.34	1.29	71	5.5	28.6	3.35341	0	NA	NA	NA	NA	0
93999	1	23	4	1	2	4.98	20.6	72	559.091	0.61	13.7	109	71	24.9	0	1	0	0	0	0	0	0	0	0	0	0	0	0	2541	63.21	74.41	8.01	3.34	1.53	75.8	4.9	39.1	3.66612	65.5	NA	NA	NA	NA	0
94003	1	75	1	2	2	2.74	12.2	73	1512.41	10.54	13.2	143	74	25.6	0	0	0	0	0	0	0	0	0	0	0	0	0	0	2575	44.64	90.84	14.94	5.72	0.96	37.9	5.5	43.2	3.76584	0	NA	NA	NA	NA	0
94007	0	79	4	1	1	3.73	18.3	69	455	0.29	11.6	128	53	23.9	0	0	1	1	0	0	0	0	0	0	0	0	0	0	1372	80.35	60.26	15.75	3.85	1.27	108	7	32.8	3.49043	0	NA	NA	NA	NA	0
94010	0	71	3	0	2	2.31	16.5	67	620.667	0.93	13.7	127	76	26.1	0	0	0	1	1	0	0	0	0	0	0	0	0	0	2817	85.07	79.88	20.8	3.08	1.53	90.4	5.8	31.4	3.44681	0	NA	NA	NA	NA	0
94012	1	25	5	2	2	2.15	21.7	75	830.379	5.2	14.6	113	69	25.2	1	1	0	0	0	0	0	0	0	0	0	0	0	0	2784	70.28	72.32	10.18	6.47	1.37	143	5.4	23.8	3.16969	98.3	NA	NA	NA	NA	1
94013	0	56	3	0	2	3.85	20.4	70	506.333	1	16.1	139	73	22.4	1	0	0	0	0	0	0	0	0	0	0	0	0	0	5449	182.47	215.81	27.95	4.97	1.37	248	5.7	25.8	3.25037	0	NA	NA	NA	NA	2
94015	1	30	3	0	0	1.18	7.3	62	197.917	1.23	14.9	112	66	26.2	0	1	0	0	0	0	0	0	0	0	0	0	0	0	944	41.87	43.11	5.64	4.37	1.06	73.1	4.8	26.6	3.28091	21.6	NA	NA	NA	NA	0
94016	0	70	5	2	0	1.11	11.3	63	206.8	0.66	13.8	122	73	21.5	1	0	0	0	1	0	0	0	0	0	0	0	0	0	1541	64.49	81.99	11.07	5.2	1.81	69.9	5.5	32.7	3.48738	0	NA	NA	NA	NA	1
94017	0	54	3	0	2	5	13.4	69	652	2.26	14.2	130	91	31.8	1	0	1	1	0	0	0	0	0	0	0	0	0	0	2953	76.49	97.92	18.94	5.66	1.27	346	5.8	38.2	3.64284	0	NA	NA	NA	NA	2
94019	1	64	4	1	1	4.57	12.4	74	682.957	3	13.1	117	74	26.4	0	0	0	0	0	0	0	0	0	0	0	0	0	0	1566	40.27	80.22	11.5	4.16	1.16	126	5.5	44.8	3.80221	0	NA	NA	NA	NA	0
94021	1	38	3	0	0	0.09	10.6	65	873.231	6.64	12.2	111	78	34.5	1	0	0	0	0	0	0	0	0	0	0	0	0	0	1744	34.37	75.62	10.54	3.57	1.47	46	4.9	32.1	3.46886	0	NA	NA	NA	NA	2
94028	1	39	2	2	2	4.43	10.4	72	378.667	0.78	13.6	102	60	21.9	1	0	0	0	0	0	0	0	0	0	0	0	0	0	1590	67.97	51.91	8.9	4.01	1.99	107	4.8	35.6	3.57235	0	NA	NA	NA	NA	2
94029	1	46	3	0	2	4.15	15.6	67	615.6	0.34	13.3	109	61	24.9	1	1	0	0	0	0	0	0	0	0	0	0	0	0	951	41.44	29.39	5.48	6.9	2.51	32.8	5.3	25.6	3.24259	14	NA	NA	NA	NA	2
94030	0	45	3	0	0	3.98	18.3	70	270.833	1.51	14.7	122	83	28.8	1	1	0	0	0	0	0	0	0	0	0	0	0	0	3639	147.45	159.83	16.46	4.47	1.47	211	5.2	31.9	3.46261	101.6	NA	NA	NA	NA	2
94031	0	67	4	1	0	0.99	9.9	72	667.5	0.39	14.7	140	99	25.9	1	1	0	0	0	0	0	0	0	0	0	0	0	0	4153	151.83	145.84	16.86	3.1	1.27	20.4	5.7	38.8	3.65842	221.8	NA	NA	NA	NA	1
94033	1	55	2	2	1	5	14.7	70	382.462	7.76	12.5	152	93	29.2	1	0	0	0	0	0	0	0	0	0	0	0	0	0	2750	112.82	107.54	17.75	5.74	1.06	81.8	5.7	24.3	3.19048	0	NA	NA	NA	NA	2
94034	1	54	2	2	0	0.41	9.1	73	330.815	9.7	14.9	122	72	31.8	0	0	0	0	1	0	0	0	0	0	0	0	0	0	1911	70.81	74.58	11.89	4.63	1.32	168	6.7	63.1	4.14472	0	NA	NA	NA	NA	0
94037	0	59	5	2	2	5	13.6	72	279.882	1.42	15.9	128	57	26.4	0	0	1	0	1	0	0	0	0	0	0	0	0	0	2287	77.85	86.07	20.32	3.88	1.27	88	8.1	33.3	3.50556	0	NA	NA	NA	NA	0
94038	1	59	1	2	2	0.91	27.2	68	390.484	2.11	15.9	103	72	30.3	1	0	1	0	0	0	0	0	0	0	0	0	0	0	2201	85.42	30.95	11.64	6.08	1.16	118	5.7	32	3.46574	0	NA	NA	NA	NA	1
94039	0	60	5	2	2	5	20.1	75	630.789	1.4	15.6	139	91	29.6	0	1	0	1	0	0	0	0	0	0	0	0	0	0	1738	64.16	58.32	8.54	3.7	1.27	275	5.5	38.6	3.65325	14	NA	NA	NA	NA	0
94041	1	60	2	2	2	5	13.4	71	554.357	0.51	12.4	122	63	22.5	0	0	0	0	0	0	0	0	0	0	0	0	0	0	1245	41.13	50.35	6.7	5.04	2.2	78.6	5.4	34.1	3.5293	0	NA	NA	NA	NA	0
94042	0	26	5	2	1	1.18	22.2	69	507.273	0.56	17.8	115	72	23.5	0	0	0	0	0	0	0	0	0	0	0	0	0	0	1451	66.2	55.11	33.16	4.5	1.19	55.1	4.8	42.4	3.74715	0	NA	NA	NA	NA	0
94043	0	64	5	2	2	5	14.9	65	532	0.42	13.4	131	75	22.2	1	1	1	0	1	0	0	0	0	0	0	0	0	0	3297	75.59	73.94	20.39	2.59	1.06	39	6.9	22.5	3.11352	42.1	NA	NA	NA	NA	1
94044	1	34	2	2	0	5	8.6	68	223.1	0.19	13.6	98	57	21.8	1	1	0	0	0	0	0	0	0	0	0	0	0	0	2371	134.92	56.02	16.83	3.34	1.6	33.1	5.1	33.4	3.50856	98.2	NA	NA	NA	NA	2
94045	0	62	2	2	0	0.89	16.8	68	588	2.28	13.8	129	70	26.1	0	0	1	0	1	0	0	0	0	0	0	0	0	0	965	42.52	50.05	7.67	4.37	0.78	49.6	10.1	39.1	3.66612	0	NA	NA	NA	NA	0
94046	0	46	2	2	0	1.39	18.8	70	715.462	1.55	14.8	115	72	28.7	1	0	0	0	0	0	0	0	0	0	0	0	0	0	2015	63.67	79.35	14.02	5.95	0.75	414	5.7	25.5	3.23868	0	NA	NA	NA	NA	2
94047	1	45	1	2	1	2.72	8.1	75	318.611	2.75	12.6	121	71	35.6	1	0	0	0	0	0	0	0	0	0	0	0	0	0	5695	254.1	251.96	34.24	4.91	0.88	16.4	6	54.3	3.99452	0	NA	NA	NA	NA	1
94048	0	80	3	0	1	2.64	21.1	68	224	0.57	13.8	125	83	21.6	1	0	0	0	0	0	0	0	0	0	0	0	0	0	1765	63.02	102.77	11.9	3.98	1.6	96.1	5.8	35.5	3.56953	0	NA	NA	NA	NA	2
94049	1	66	4	1	2	1.02	14.1	67	124.32	3.64	13.7	201	86	58.7	0	0	0	1	0	0	0	0	0	0	0	0	0	0	1259	32.3	33.76	5.17	5.82	1.27	76.7	5.8	28.4	3.34639	0	NA	NA	NA	NA	0
94050	1	55	3	0	1	1.01	10.7	66	719.056	2.47	14.8	131	84	27.3	0	0	0	1	1	0	0	0	0	0	0	0	0	0	2198	62.95	88.29	15.55	6.98	1.03	40.6	5.6	33.9	3.52342	0	NA	NA	NA	NA	0
94051	1	80	3	0	1	5	19.7	67	527.273	0.87	13.8	125	57	29.1	0	0	0	0	0	0	0	0	0	0	0	0	0	0	1810	57.03	58.55	16.56	4.81	1.47	80	5.9	33.4	3.50856	0	NA	NA	NA	NA	0
94054	0	50	1	2	1	1.19	6.6	79	842.909	12.55	13.5	81	56	30.4	1	0	1	1	0	0	0	0	0	0	0	0	0	0	1911	70.81	74.58	11.89	3.98	1.5	1100	8.9	26.6	3.28091	0	NA	NA	NA	NA	2
94057	1	62	3	0	0	3.15	7.3	77	1102	63.32	12	120	73	32.2	1	0	0	1	0	0	0	0	0	0	0	0	0	0	2734	193.62	182.43	9.65	4.97	1.03	358	5.7	36.3	3.59182	0	NA	NA	NA	NA	1
94058	1	61	3	0	2	2.34	10.7	58	275.65	2.16	13.4	154	66	44.8	1	0	0	1	1	0	0	0	0	0	0	0	0	0	1020	28.18	24.74	3.67	5.61	1.01	44.5	5.3	68.1	4.22098	0	NA	NA	NA	NA	2
94060	0	59	3	0	2	2.2	10.6	67	392.097	7.03	14.4	129	81	41	0	0	0	0	1	0	0	0	0	0	0	0	0	0	1014	66.64	31.25	8.16	5.04	0.85	201	5.8	52.9	3.9684	0	NA	NA	NA	NA	0
94061	1	36	1	2	0	0.87	5	73	746.743	45.07	13.5	102	62	32.9	0	0	1	0	0	0	0	0	0	0	0	0	0	0	1445	80.81	22.96	22.75	4.42	1.01	31.4	6	42	3.73767	0	NA	NA	NA	NA	0
94065	1	69	4	1	1	2.07	22	70	236.55	0.39	13.4	143	69	27.4	0	0	0	1	0	0	0	0	0	0	0	0	0	0	1080	49.29	49.09	7.08	5.51	1.97	79.2	6.1	40.4	3.69883	0	NA	NA	NA	NA	0
94067	0	44	1	2	0	1.22	12.5	70	655.667	1.15	13.9	131	86	35.8	1	0	0	0	0	0	0	0	0	0	0	0	0	0	3118	104.81	120.17	15.92	5.51	1.24	11	5.8	38.9	3.66099	0	NA	NA	NA	NA	2
94068	0	69	3	0	2	4.93	15.9	65	300.391	1.52	16.2	125	67	28.2	1	0	0	1	0	0	0	0	0	0	0	0	0	0	2261	93.22	107.12	19.97	4.42	1.06	67.4	5.1	31.4	3.44681	0	NA	NA	NA	NA	2
94069	0	61	3	0	1	2.65	17	72	639.294	12.46	15	128	77	31.3	0	0	1	1	1	0	0	0	0	0	0	0	0	0	2145	101.24	102.22	9.72	6.15	1.06	94.7	7	34.1	3.5293	0	NA	NA	NA	NA	0
94073	0	69	2	2	0	3.78	15.6	80	427.875	5.9	15.5	145	91	34.9	1	0	1	1	1	0	0	0	0	0	0	0	0	0	1556	86.5	61.78	10.9	3.67	1.16	253	6.2	48.1	3.87328	0	NA	NA	NA	NA	2
94074	0	29	3	0	2	5	9.7	74	401.5	0.95	14.4	106	77	20.6	0	0	0	0	0	0	0	0	0	0	0	0	0	0	1749	64.28	60.49	5.98	3.78	1.01	87.6	5.2	40.4	3.69883	0	NA	NA	NA	NA	0
94080	1	79	3	0	1	2.46	19.7	75	581.263	1	13.2	114	53	22.3	0	0	0	1	0	0	0	0	0	0	0	0	0	0	1689	84.21	61.51	19.54	3.31	1.66	239	5.6	31.5	3.44999	0	NA	NA	NA	NA	0
94081	0	80	5	2	2	5	21.7	75	244.211	1.76	13.3	155	72	24.7	0	0	1	0	0	1	NA	NA	NA	NA	NA	1	1	NA	2553	95.41	99.69	19.04	5.28	1.81	77.4	6.8	21.2	3.054	0	30	NA	NA	NA	0
94082	1	69	3	0	2	5	19.5	70	570.207	1.07	15	157	86	22.3	0	1	0	1	0	0	0	0	0	0	0	0	0	0	2256	88.16	97.24	10.84	5.09	1.24	114	5.6	24	3.17805	22.3	NA	NA	NA	NA	0
94084	1	61	5	2	1	2.77	15	74	454.571	1.57	14	119	70	29	0	0	1	1	0	0	0	0	0	0	0	0	0	0	1911	70.81	74.58	11.89	4.99	1.45	99.1	6.2	37.4	3.62167	0	NA	NA	NA	NA	0
94093	0	36	3	0	1	5	15	71	516	2.86	16.5	125	81	34.4	1	1	1	0	0	0	0	0	0	0	0	0	0	0	2775	80.08	78.17	14.83	5.04	1.16	163	6	27.4	3.31054	143.8	NA	NA	NA	NA	2
94095	1	78	4	1	2	1.69	10.7	70	305.735	3.97	11.6	171	73	29	0	0	0	1	1	0	0	0	0	0	0	0	0	0	655	15.96	28.95	3.95	3.44	1.4	32.3	5.4	39.2	3.66868	0	NA	NA	NA	NA	0
94097	1	62	3	0	1	1.18	12	64	222.6	1.59	14.1	104	66	35.7	1	1	1	0	0	0	0	0	0	0	0	0	0	0	1550	77.56	68.65	13.48	5.2	1.29	318	5.4	43.3	3.76815	12.8	NA	NA	NA	NA	2
94098	1	23	4	1	2	1.54	10.7	72	620	2.66	14	107	69	30.3	0	0	0	0	0	0	0	0	0	0	0	0	0	0	2753	63.04	122.08	10.77	4.6	1.32	23.8	5.2	39.2	3.66868	0	NA	NA	NA	NA	0
94101	1	64	5	2	2	5	18.1	74	345.826	1.15	14.8	141	75	29.7	0	0	0	1	0	1	NA	NA	NA	NA	NA	NA	NA	NA	1098	66.43	34.19	10.02	4.24	1.11	192	6.3	40.5	3.7013	0	25	NA	NA	NA	0
94105	1	46	1	2	2	5	16.5	64	638.4	12.95	14.8	119	79	28	1	1	0	0	0	0	0	0	0	0	0	0	0	0	2385	40.83	63.16	6.28	5.28	1.68	158	5.3	32.6	3.48431	97.4	NA	NA	NA	NA	1
94108	0	64	1	2	0	1.72	14.3	71	252.5	1.26	17.4	158	67	26.4	1	0	0	0	0	0	0	0	0	0	0	0	0	0	2861	97.24	106.34	19.57	5.07	1.01	227	5.8	30.2	3.40784	0	NA	NA	NA	NA	2
94112	0	28	1	2	2	1.82	30.1	72	471.154	2.67	15.9	104	51	28	1	0	0	0	0	0	0	0	0	0	0	0	0	0	1352	63.06	66.98	10.19	5.56	1.63	137	5.4	29.4	3.38099	0	NA	NA	NA	NA	2
94113	1	60	3	0	1	2.02	14.5	71	459	1.37	12.9	127	63	23.4	0	0	1	0	0	0	0	0	0	0	0	0	0	0	1492	90.91	47.77	5.69	6.83	1.4	161	8.6	45.9	3.82647	0	NA	NA	NA	NA	0
94116	1	60	3	0	2	3.65	18.8	74	941.538	1.41	12.2	145	77	25.1	0	0	0	1	0	1	NA	NA	NA	NA	NA	NA	NA	NA	718	34.62	39.34	5.34	8.28	2.69	211	5.3	24.8	3.21084	0	39	NA	NA	NA	0
94117	1	57	3	0	0	1.88	17.2	73	1036	30.62	14.5	152	79	74.8	1	0	1	0	0	0	0	0	0	0	0	0	0	0	2483	124.66	101.45	21.1	5.38	1.09	241	6.9	35	3.55535	0	NA	NA	NA	NA	1
94119	0	57	4	1	2	2.64	10.4	71	398.478	3.78	13.8	159	73	23.5	0	0	0	1	1	0	0	0	0	0	0	0	0	0	1119	52.26	41.33	3.95	4.09	0.83	458	6.1	51.9	3.94932	0	NA	NA	NA	NA	0
94124	0	55	2	2	0	1.1	8.6	75	281.522	1.04	15	109	73	27.8	0	0	0	0	0	0	0	0	0	0	0	0	0	0	3179	132.02	123.8	15.99	4.63	0.8	184	5.7	32.2	3.47197	0	NA	NA	NA	NA	0
94126	1	62	4	1	0	1.54	9.7	69	279.348	2.45	12.4	143	68	33.6	0	0	1	1	0	0	0	0	0	0	0	0	0	0	2619	96.19	124.84	32.13	3.34	1.76	20.7	9.4	83.5	4.42485	0	NA	NA	NA	NA	0
94128	0	35	4	1	2	5	14.3	78	153.793	3.48	14.8	123	87	38.3	0	0	0	0	0	0	0	0	0	0	0	0	0	0	2229	78.91	110.12	11.56	7.03	0.65	210	5.8	48.6	3.88362	0	NA	NA	NA	NA	0
94131	1	39	3	0	2	3.05	8.8	69	267.267	6.93	13.1	116	72	45.1	0	0	0	0	0	0	0	0	0	0	0	0	0	0	1700	54.09	58.86	10.09	4.65	1.5	6.71	6.7	60.3	4.09933	0	NA	NA	NA	NA	0
94134	1	61	2	2	2	1.02	12	73	375	8.61	13.7	121	77	28.7	0	0	0	0	0	0	0	0	0	0	0	0	0	0	1192	46.61	51.73	7.54	3.9	1.01	101	5.7	43.3	3.76815	0	NA	NA	NA	NA	0
94135	1	37	2	2	2	3.04	13.4	70	157	1.91	14.1	122	72	26	1	0	0	1	0	0	0	0	0	0	0	0	0	0	1911	70.81	74.58	11.89	4.29	1.34	39.8	5.6	39.8	3.68387	0	NA	NA	NA	NA	1
94137	1	49	4	1	2	4.86	15.9	79	293.391	1.35	13.1	115	75	24.5	0	0	0	1	0	0	0	0	0	0	0	0	0	0	1002	31.44	20.12	8.38	4.73	1.66	45.5	5.6	26.3	3.26957	0	NA	NA	NA	NA	0
94138	1	72	5	2	2	5	7.5	66	445.263	1.39	11.5	139	73	25.2	0	0	1	1	0	0	0	0	0	0	0	0	0	0	900	38.87	37.42	3.35	3.83	1.99	35.1	6.5	55.1	4.00915	0	NA	NA	NA	NA	0
94139	1	49	2	2	2	1.15	9.3	67	873.8	5.51	14.2	121	71	32	1	1	0	0	0	0	0	0	0	0	0	0	0	0	3180	142.26	150.91	16.23	4.94	1.66	34.9	5.3	23.8	3.16969	42.1	NA	NA	NA	NA	1
94141	0	71	4	1	2	5	12.9	71	462.417	1.16	14.6	144	70	24.4	0	0	0	1	0	0	0	0	0	0	0	0	0	0	2291	122.27	100.19	14.11	3.98	1.32	63.7	5.8	40.4	3.69883	0	NA	NA	NA	NA	0
94150	0	68	3	0	0	1.75	22.4	69	190.593	1.33	12.7	113	57	34.2	0	0	1	1	0	0	0	0	0	0	0	0	0	0	1352	28.45	23.71	4.7	4.09	1.03	159	8.7	28.4	3.34639	0	NA	NA	NA	NA	0
94151	0	23	2	2	2	5	17.2	70	142.606	0.29	14.4	106	57	27.9	0	0	0	0	0	0	0	0	0	0	0	0	0	0	2454	84.95	109.88	7.92	3.26	1.24	152	5.2	31.5	3.44999	0	NA	NA	NA	NA	0
94152	1	64	3	0	2	0.92	15.9	67	489.6	0.55	14	119	72	21.3	0	0	0	0	0	0	0	0	0	0	0	0	0	0	2712	141.41	144.8	17.22	7.06	1.71	189	5.3	26.2	3.26576	0	NA	NA	NA	NA	0
94154	1	80	3	0	2	5	20.2	67	390.476	2.79	15	131	57	23.4	0	0	0	0	0	0	0	0	0	0	0	0	0	0	2742	98.12	116.7	23.31	5.64	1.22	208	5.9	34.5	3.54096	0	NA	NA	NA	NA	0
94155	0	56	5	2	2	5	7.9	76	734.25	2.72	15	121	66	38	0	0	1	1	1	0	0	0	0	0	0	0	0	0	1636	39.88	89.96	11.37	3.13	1.24	332	6	31	3.43399	0	NA	NA	NA	NA	0
94156	1	63	1	2	1	5	12.5	66	183.333	1.28	14.3	115	76	28.8	1	0	0	0	0	0	0	0	0	0	0	0	0	0	2416	61.85	130.11	12.95	4.99	1.11	141	5.5	39.6	3.67883	0	NA	NA	NA	NA	2
94157	1	60	5	2	1	5	17.6	71	260.667	0.67	13.6	121	77	18.3	0	0	0	0	0	0	0	0	0	0	0	0	0	0	1424	50.96	94.44	8.63	7.27	1.34	54.9	5.7	38.4	3.64806	0	NA	NA	NA	NA	0
94160	1	22	3	0	2	4.04	11.3	68	318.609	1.07	13.3	112	63	23.1	0	0	0	0	0	0	0	0	0	0	0	0	0	0	1451	106.37	56.85	11.89	4.97	1.53	13.5	5	40.6	3.70377	0	NA	NA	NA	NA	0
94162	0	64	2	2	0	0.48	15.2	66	447.333	0.97	13.3	118	56	24	0	0	0	0	0	0	0	0	0	0	0	0	0	0	1189	27.44	13.58	4.26	6.39	1.68	609	6	22.5	3.11352	0	NA	NA	NA	NA	0
94163	0	35	3	0	0	1.53	31.2	68	632.25	0.45	14.5	109	82	24.6	1	0	0	0	0	0	0	0	0	0	0	0	0	0	6642	133.72	252.85	21.27	3.98	0.96	129	5.3	28.8	3.36038	0	NA	NA	NA	NA	1
94166	0	28	3	0	2	0.99	17	71	769.231	0.59	16.4	132	83	31.6	0	0	0	0	0	0	0	0	0	0	0	0	0	0	4211	134.54	211.09	25.04	6.36	1.24	184	5.1	40.2	3.69387	0	NA	NA	NA	NA	0
94168	1	66	2	2	0	0.4	8.1	73	691.944	2.69	13.9	156	77	32.4	1	1	0	1	0	0	0	0	0	0	0	0	0	0	1259	71.56	40.01	8.86	5.48	1.19	10.8	5.2	60.7	4.10594	18.5	NA	NA	NA	NA	2
94169	0	26	5	2	2	5	20.1	74	176.75	0.36	16.1	123	73	25.9	1	0	0	0	0	0	0	0	0	0	0	0	0	0	1911	70.81	74.58	11.89	5.48	1.24	106	5	31.6	3.45316	0	NA	NA	NA	NA	2
94173	1	68	4	1	1	0.74	6.3	75	1311.11	3.45	10.4	127	79	33.6	1	0	0	1	0	0	0	0	0	0	0	0	0	0	886	25.98	30.61	4.1	3.8	1.55	32.9	5.9	90.3	4.50314	0	NA	NA	NA	NA	2
94175	0	77	3	0	1	1.46	12.2	64	2520	1.16	12.3	115	59	26.1	1	0	0	1	0	1	NA	NA	NA	NA	NA	1	1	NA	7084	255.03	309.85	40.54	3.36	1.4	53.4	5.3	47.4	3.85862	0	30	NA	NA	NA	2
94176	1	24	3	0	2	3.48	12.2	67	765	0.48	12.2	114	65	27.7	0	1	0	0	0	0	0	0	0	0	0	0	0	0	2274	75.36	96.49	16.27	4.32	1.5	19	5.2	33.9	3.52342	14	NA	NA	NA	NA	0
94177	1	59	1	2	2	1.64	25.3	69	354.2	0.73	13.7	125	74	25.9	0	0	0	0	0	0	0	0	0	0	0	0	0	0	1563	62.57	57.45	14.45	4.84	1.84	286	5.5	27.7	3.32143	0	NA	NA	NA	NA	0
94179	0	72	3	0	1	1.52	14	74	754.765	0.48	14.7	111	45	49.7	1	0	1	1	1	0	0	0	0	0	0	0	0	0	2025	78.95	66.75	36.61	4.71	1.42	178	6.6	54.9	4.00551	0	NA	NA	NA	NA	2
94182	1	59	3	0	2	5	12.7	58	302.417	0.31	13	109	60	23.2	0	0	0	0	0	0	0	0	0	0	0	0	0	0	1911	70.81	74.58	11.89	3.88	1.42	47	5.2	29.6	3.38777	0	NA	NA	NA	NA	0
94183	0	49	3	0	2	5	15.4	75	408.375	3.28	15.1	138	95	44.5	0	0	0	0	0	0	0	0	0	0	0	0	0	0	2519	120.79	100.95	21.91	5.77	1.24	315	5.9	33.5	3.51155	0	NA	NA	NA	NA	0
94187	1	54	5	2	2	5	14.7	73	359.438	1.45	12.7	154	87	29.6	0	0	0	0	0	0	0	0	0	0	0	0	0	0	719	27.71	30.44	4.74	5.17	1.63	242	5.4	30.8	3.42751	0	NA	NA	NA	NA	0
94189	1	21	1	2	1	1.49	9.7	67	340.966	5.91	13.1	104	57	40.1	0	0	0	0	0	0	0	0	0	0	0	0	0	0	3148	112.98	179.28	13.01	3.34	1.24	36.5	5.3	33.3	3.50556	0	NA	NA	NA	NA	0
94190	0	43	5	2	2	4.07	20.8	73	362.727	0.22	16.5	111	79	25.7	1	0	0	0	0	0	0	0	0	0	0	0	0	0	1592	100.77	83.06	11.15	3.85	1.4	236	5.2	24.9	3.21487	0	NA	NA	NA	NA	1
94192	1	54	3	0	1	5	19	64	629.067	2.61	15.2	128	83	41.8	1	0	1	0	0	0	0	0	0	0	0	0	0	0	1131	48.93	31.88	7.6	3.93	1.14	84	6.9	21.5	3.06805	0	NA	NA	NA	NA	1
94193	1	58	4	1	2	1.68	9.1	75	321.391	10.99	14.1	145	103	41.1	0	1	0	1	0	0	0	0	0	0	0	0	0	0	2252	75.68	98.57	15.37	3.78	1.19	72.6	6	36.3	3.59182	2.3	NA	NA	NA	NA	0
94198	1	63	1	2	0	4.93	11.8	70	496.8	6.37	14.8	117	64	28.4	1	0	0	0	0	0	0	0	0	0	0	0	0	0	2048	48.4	81.63	13.29	5.92	2.2	28.4	5.7	26.3	3.26957	0	NA	NA	NA	NA	1
94199	0	69	5	2	1	0	12	72	652.632	1.54	13.3	125	61	21.8	1	0	1	1	0	0	0	0	0	0	0	0	0	0	1911	70.81	74.58	11.89	4.14	1.06	177	6.7	35	3.55535	0	NA	NA	NA	NA	2
94200	1	26	2	2	2	3.59	26	69	423.65	4.71	14.1	115	71	37.8	0	0	0	0	0	0	0	0	0	0	0	0	0	0	1904	74.7	67.5	7.84	3.47	1.4	157	5	30	3.4012	0	NA	NA	NA	NA	0
94202	0	70	3	0	2	5	8.1	75	699.636	14.76	13.9	118	66	36.8	0	0	0	0	0	1	NA	NA	NA	NA	NA	1	1	NA	2323	96.02	106.98	14.46	5.15	1.32	85.7	5.7	44.4	3.79324	0	30	NA	NA	NA	0
94206	0	56	5	2	2	3.85	21.5	68	455.4	0.84	14	133	82	27.2	0	0	0	0	0	0	0	0	0	0	0	0	0	0	2139	141.46	101.41	20.56	6.49	1.66	119	5.6	30.4	3.41444	0	NA	NA	NA	NA	0
94207	0	62	4	1	0	0.76	11.3	67	138.571	6.14	15.5	139	72	30.8	1	0	0	0	1	0	0	0	0	0	0	0	0	0	2793	55.28	80.86	12.13	5.4	1.47	99.7	5.5	23.5	3.157	0	NA	NA	NA	NA	1
94208	1	45	4	1	2	3.67	7.5	77	519.273	3.56	12.2	114	61	46	0	0	1	1	1	1	NA	NA	NA	NA	NA	NA	NA	NA	2427	57.06	141.16	8.94	3.62	1.19	26	6.1	42.5	3.7495	0	39	NA	NA	NA	0
94210	0	80	4	1	0	0.86	14.9	73	153.231	0.75	11.5	114	83	24.2	0	0	0	0	0	0	0	0	0	0	0	0	0	0	3013	102.62	123.83	33.24	5.09	1.37	63.2	6	38	3.63759	0	NA	NA	NA	NA	0
94211	1	23	3	0	2	2.97	15.8	74	297.25	0.28	13.5	98	59	18.6	0	0	0	0	0	0	0	0	0	0	0	0	0	0	1697	62.29	101.42	9.43	3.93	1.71	33	5.1	21.9	3.08649	0	NA	NA	NA	NA	0
94212	1	67	5	2	2	2.79	10.7	63	251.647	0.32	13.3	125	73	22	0	0	0	0	1	0	0	0	0	0	0	0	0	0	1439	51.54	64.94	8.43	4.63	1.4	291	5.6	33.6	3.51453	0	NA	NA	NA	NA	0
94216	1	67	4	1	2	5	9.3	67	486	2.09	12.2	164	79	30.2	0	0	1	1	1	0	0	0	0	0	0	0	0	0	499	24.98	24.05	2.07	3.72	1.45	55.5	6.7	53.3	3.97594	0	NA	NA	NA	NA	0
94221	1	27	4	1	2	0	20.8	74	1663.2	0.63	14.8	105	67	23.7	0	0	0	0	0	0	0	0	0	0	0	0	0	0	1911	70.81	74.58	11.89	5.56	1.5	19.4	5.1	30.9	3.43076	0	NA	NA	NA	NA	0
94223	1	43	2	2	2	0.94	10.2	75	991.179	9.43	13.3	101	70	29.3	1	0	0	0	0	0	0	0	0	0	0	0	0	0	3133	109.71	200.85	20.76	5.3	0.91	56.8	5.6	39.5	3.6763	0	NA	NA	NA	NA	2
94224	0	23	2	2	2	4.74	19.7	74	572	3.84	16.7	122	57	36	1	0	0	0	0	0	0	0	0	0	0	0	0	0	1911	70.81	74.58	11.89	5.48	1.14	138	5.2	52.7	3.96462	0	NA	NA	NA	NA	2
94227	0	80	3	0	2	5	19.5	72	456.783	1.02	15.2	114	67	32.3	0	0	0	1	0	1	NA	NA	NA	NA	NA	1	1	NA	1378	68.78	54.53	6.54	4.86	1.97	441	5.5	36.8	3.6055	0	30	NA	NA	NA	0
94232	0	70	3	0	2	5	16.7	70	506.25	3.16	15.3	108	64	27.5	0	1	1	1	0	0	0	0	0	0	0	0	0	0	2021	65.92	107.28	7.86	3.54	1.55	483	10	27.6	3.31782	26.1	NA	NA	NA	NA	0
94233	0	62	1	2	0	2.45	32.6	75	460.625	0.68	15.9	126	71	24.7	1	0	0	0	0	0	0	0	0	0	0	0	0	0	1165	28.19	25.69	12.97	4.81	1.27	857	5.9	15.9	2.76632	0	NA	NA	NA	NA	2
94237	0	63	3	0	2	5	14	70	1108.8	0.87	15.8	115	64	36.4	0	0	0	1	0	1	NA	NA	NA	NA	NA	1	1	NA	2987	104.01	128.89	18.59	2.87	0.93	396	5.4	57.6	4.05352	0	30	NA	NA	NA	0
94241	1	30	5	2	2	2.66	22.4	79	4221.19	0.8	16.4	107	80	30.1	0	0	0	0	0	0	0	0	0	0	0	0	0	0	2021	102.27	98.81	13.76	5.79	1.4	195	4.5	38.4	3.64806	0	NA	NA	NA	NA	0
94242	0	60	4	1	1	0.07	14.1	69	138	1.59	14.8	97	69	25	1	1	1	1	1	0	0	0	0	0	0	0	0	0	2952	156.66	67.11	10.93	3.85	1.4	111	6.8	33.3	3.50556	93.6	NA	NA	NA	NA	1
94243	0	80	5	2	1	1.48	22	62	230.533	0.21	13.3	136	54	28.2	1	0	1	1	0	1	NA	NA	NA	NA	NA	1	1	NA	1348	65.94	58.96	24.84	3.83	1.55	210	6.7	34.1	3.5293	0	30	NA	NA	NA	2
94245	1	31	3	0	2	2.88	29.9	72	490.435	0.74	13	112	63	26.6	1	1	0	0	0	0	0	0	0	0	0	0	0	0	2799	85.55	47.21	22.14	3.72	1.89	77.3	4.8	28.9	3.36384	166.3	NA	NA	NA	NA	1
94247	0	27	3	0	1	2.13	13.1	69	278.778	5.69	16.4	111	80	45.7	1	0	0	1	0	0	0	0	0	0	0	0	0	0	2824	102.25	116.62	9.22	3.39	0.78	176	5.4	37.9	3.63495	0	NA	NA	NA	NA	2
94248	1	38	4	1	1	0.87	24	69	374.519	13.98	13.5	117	72	32	0	0	0	0	0	0	0	0	0	0	0	0	0	0	867	6.01	33.29	3.88	5.12	2.04	30.6	5.4	44.3	3.79098	0	NA	NA	NA	NA	0
94249	1	66	4	1	2	1.85	13.1	69	1865	1.28	13.2	122	72	33.9	0	0	0	0	0	0	0	0	0	0	0	0	0	0	909	31.24	28.19	5.83	4.91	2.02	104	6.2	54.5	3.9982	0	NA	NA	NA	NA	0
94250	1	23	3	0	2	3.37	9.1	73	966	7.07	13.2	118	57	42.4	1	0	0	0	0	0	0	0	0	0	0	0	0	0	1911	70.81	74.58	11.89	4.19	1.42	25.7	5.1	48.1	3.87328	0	NA	NA	NA	NA	2
94251	1	22	3	0	1	2.79	7.3	71	325.306	12.39	14.1	105	60	24.8	1	0	0	0	0	0	0	0	0	0	0	0	0	0	1214	29.21	55.15	16.23	4.84	1.24	19.4	5.1	35.3	3.56388	0	NA	NA	NA	NA	1
94253	1	70	5	2	2	1.03	7.7	73	270	5.1	13.8	139	66	36.8	0	0	0	0	0	1	1	1	NA	NA	NA	NA	NA	NA	1559	71.38	61.47	24.88	4.37	1.14	61	6.1	45.3	3.81331	0	39	14	NA	NA	0
94255	0	43	1	2	2	3.88	15.8	71	354.316	1.31	17.5	125	87	31.6	0	0	0	1	0	0	0	0	0	0	0	0	0	0	2158	89.18	90.38	23.19	5.97	0.91	282	5.2	39.6	3.67883	0	NA	NA	NA	NA	0
94258	0	51	3	0	1	2.57	33.3	73	595.35	0.66	16.4	124	86	28.7	0	0	0	0	0	0	0	0	0	0	0	0	0	0	1754	74.04	86.37	8.71	4.97	0.96	223	5.8	23.5	3.157	0	NA	NA	NA	NA	0
94259	1	50	5	2	1	2.09	12.5	79	308.125	0.8	14	117	85	23	0	0	0	0	0	0	0	0	0	0	0	0	0	0	1519	52.76	49.05	10.96	5.25	2.59	82.5	5.8	44.5	3.79549	0	NA	NA	NA	NA	0
94260	1	48	5	2	0	0.32	6.8	77	444.975	5.91	11	122	72	34.5	0	0	0	0	0	0	0	0	0	0	0	0	0	0	1027	32	39.55	6.86	4.42	1.16	9.47	6.3	62.9	4.14155	0	NA	NA	NA	NA	0
94261	1	63	5	2	2	3.39	17.9	77	965.833	1.59	15.8	112	75	23	0	0	0	0	0	0	0	0	0	0	0	0	0	0	598	21.77	13.64	4.26	3.39	1.24	572	7.1	117	4.76217	0	NA	NA	NA	NA	0
94262	0	22	1	2	1	1.37	13.4	75	310	0.24	14.9	107	58	19.4	0	0	0	0	0	0	0	0	0	0	0	0	0	0	5979	254.94	249.55	36.84	3.05	1.58	104	5.3	25.8	3.25037	0	NA	NA	NA	NA	0
94266	0	43	2	2	0	1.29	27.6	76	532.875	1.51	15.7	109	68	26.7	1	0	0	0	0	0	0	0	0	0	0	0	0	0	4117	175.56	179.17	19.34	4.22	0.93	160	5.1	27.3	3.30689	0	NA	NA	NA	NA	2
94267	1	80	5	2	2	5	10.7	71	274.857	0.78	13.9	133	72	24.7	0	0	0	1	0	0	0	0	0	0	0	0	0	0	2596	105.99	86.43	22.61	5.12	2.48	118	5.8	26.3	3.26957	0	NA	NA	NA	NA	0
94270	0	33	1	2	0	0.41	27.6	76	562.222	1.21	15.8	113	69	24.9	0	1	0	0	0	0	0	0	0	0	0	0	0	0	1994	114.2	49.24	12.24	5.07	1.06	80.5	5.4	28.4	3.34639	37.4	NA	NA	NA	NA	0
94274	1	58	2	2	2	5	34.7	67	640	1.25	14.3	127	83	32.9	0	0	0	0	0	0	0	0	0	0	0	0	0	0	1433	53.7	55.75	14.11	4.94	1.47	18	5.7	34.6	3.54385	0	NA	NA	NA	NA	0
94275	0	54	1	2	2	3.85	19.2	77	281.842	1.7	15.4	135	90	31	0	0	0	1	0	0	0	0	0	0	0	0	0	0	3143	173.52	120.65	24.59	3.98	1.89	165	5.1	22.8	3.12676	0	NA	NA	NA	NA	0
94276	0	80	5	2	1	2.59	16.3	81	301.471	3.01	18.4	189	105	24.4	0	0	0	1	1	0	0	0	0	0	0	0	0	0	1911	70.81	74.58	11.89	6.28	0.96	81.8	6.2	64.9	4.17285	0	NA	NA	NA	NA	0
94277	1	41	2	2	0	0.62	10.9	76	908.471	1.12	13.8	122	72	28.3	0	0	0	0	0	0	0	0	0	0	0	0	0	0	902	39.13	31.16	8.38	5.46	1.11	54.4	5.2	41.3	3.72086	0	NA	NA	NA	NA	0
94279	0	39	5	2	2	4.81	17.9	72	455.8	0.44	14.1	95	69	24.2	0	0	0	0	0	0	0	0	0	0	0	0	0	0	1749	86.1	42.93	26.97	4.09	0.98	203	5.4	31.4	3.44681	0	NA	NA	NA	NA	0
94281	1	31	5	2	1	0.28	2.5	67	1946.28	6.06	9.3	122	72	39.5	1	0	0	0	0	0	0	0	0	0	0	0	0	0	2740	68.69	89.5	13.23	4.45	0.83	11.7	5.6	155	5.04343	0	NA	NA	NA	NA	1
94283	1	60	4	1	1	0.31	13.8	68	304.762	5.36	14.7	121	75	45.4	1	1	0	1	1	0	0	0	0	0	0	0	0	0	1823	62.08	64.49	18.94	4.63	1.06	138	11.1	37.4	3.62167	12.7	NA	NA	NA	NA	2
94284	1	58	4	1	0	2.73	12.4	69	273.038	2.29	13.5	133	86	26	0	0	0	0	0	0	0	0	0	0	0	0	0	0	1911	70.81	74.58	11.89	6.41	1.71	103	5.7	33.7	3.5175	0	NA	NA	NA	NA	0
94285	0	43	2	2	0	2.04	20.6	72	410.4	7	17.9	123	73	43.7	1	0	1	1	0	0	0	0	0	0	0	0	0	0	6354	117.84	166.31	19.52	5.77	0.78	359	12	16.6	2.8094	0	NA	NA	NA	NA	1
94286	1	75	4	1	2	5	10.4	77	622.625	2.89	13.6	127	82	23.3	0	0	0	1	0	0	0	0	0	0	0	0	0	0	1888	62.74	74.79	35.02	5.12	1.76	60.8	6	53.8	3.98527	0	NA	NA	NA	NA	0
94287	0	20	3	0	1	5	17.9	67	351.333	1.44	14.7	108	63	35.3	0	0	0	0	0	0	0	0	0	0	0	0	0	0	1702	126.91	63.92	33.24	4.37	0.91	29	4.6	32.9	3.49347	0	NA	NA	NA	NA	0
94290	1	35	5	2	2	3.03	11.8	78	711	2.05	14.8	105	71	33.3	0	0	0	0	0	0	0	0	0	0	0	0	0	0	1592	53.42	54.58	7.86	6.36	1.76	40.7	5.2	43.4	3.77046	0	NA	NA	NA	NA	0
94291	1	27	1	2	1	1.71	7.5	74	432.321	1.09	12.4	123	82	27.8	0	0	0	0	0	0	0	0	0	0	0	0	0	0	1759	117.01	66.59	31.99	3.54	1.4	9.55	5.2	42.7	3.7542	0	NA	NA	NA	NA	0
94293	0	64	3	0	2	5	26.7	71	484.7	3.13	15.9	145	85	30	0	0	0	0	0	0	0	0	0	0	0	0	0	0	2259	103.26	87.74	11.24	4.5	1.29	272	5.8	28.7	3.3569	0	NA	NA	NA	NA	0
94295	1	48	5	2	0	3.82	10.2	70	701.25	10.63	14.1	121	71	32.8	0	0	0	0	0	0	0	0	0	0	0	0	0	0	2105	51.82	104.3	10.49	5.43	1.29	86.7	5.3	86.1	4.45551	0	NA	NA	NA	NA	0
94298	0	80	5	2	2	2.46	9.9	61	247.5	2.17	12.6	142	52	32.5	0	0	0	1	0	0	0	0	0	0	0	0	0	0	1911	70.81	74.58	11.89	3.23	1.47	118	6	51.2	3.93574	0	NA	NA	NA	NA	0
94300	1	69	3	0	2	3.87	14.5	71	510.714	3.87	13.4	127	69	35.8	0	1	0	1	0	0	0	0	0	0	0	0	0	0	2495	86.46	69.47	12.86	4.47	1.14	142	5.4	40.7	3.70623	45.7	NA	NA	NA	NA	0
94301	1	64	5	2	2	1.79	19.9	64	364	0.51	13.6	152	82	26	0	0	0	0	0	0	0	0	0	0	0	0	0	0	1382	48.93	38.28	9.47	6.72	2.74	194	5.6	28.6	3.35341	0	NA	NA	NA	NA	0
94303	0	65	2	2	0	0.7	15.9	72	306	0.46	14.6	129	77	21	1	0	1	0	0	0	0	0	0	0	0	0	0	0	1216	48.32	46.16	7.28	3.7	0.98	151	8.5	30.1	3.40453	0	NA	NA	NA	NA	2
94304	0	40	5	2	2	3.47	18.8	81	431.591	1.6	14.8	97	65	23.4	0	0	0	0	0	0	0	0	0	0	0	0	0	0	2013	62.46	74.65	14.71	4.42	1.32	206	5.3	36.5	3.59731	0	NA	NA	NA	NA	0
94306	1	22	3	0	2	1.73	5.6	70	498.409	0.47	12.5	111	61	18.5	0	0	0	0	0	0	0	0	0	0	0	0	0	0	2525	84.81	121.81	12.09	4.01	1.91	8.35	5.1	53.1	3.97218	0	NA	NA	NA	NA	0
94311	1	41	4	1	2	3.28	15.8	69	440.692	0.69	12.3	126	82	28.6	1	0	0	0	0	0	0	0	0	0	0	0	0	0	1911	70.81	74.58	11.89	5.15	1.71	8.25	5.5	43.3	3.76815	0	NA	NA	NA	NA	1
94314	0	48	5	2	0	1.79	20.2	68	270	0.48	15.7	123	87	23.7	1	0	0	0	0	0	0	0	0	0	0	0	0	0	2429	124.87	86.24	20.37	3.21	1.29	173	5.5	23.2	3.14415	0	NA	NA	NA	NA	1
94319	0	44	3	0	2	5	22.2	72	405.154	0.84	15.8	111	71	26.4	1	1	0	0	0	0	0	0	0	0	0	0	0	0	2325	51.61	79.7	17.2	7.06	1.34	309	5.1	31.9	3.46261	109.6	NA	NA	NA	NA	2
94320	0	33	4	1	1	1.18	27	67	350	1.64	14.4	141	94	20	1	0	0	1	0	0	0	0	0	0	0	0	0	0	3332	119.89	114.37	22.13	4.71	1.78	154	5.4	34.3	3.53515	0	NA	NA	NA	NA	1
94321	0	60	4	1	0	0.74	5.2	74	982.917	5.23	10.6	115	71	33.2	1	1	1	0	0	0	0	0	0	0	0	0	0	0	1478	43.59	60.64	5.34	3.31	1.53	14.8	6.2	96.6	4.57058	32.6	NA	NA	NA	NA	2
94323	0	60	5	2	2	5	21.5	75	511.966	3.8	14.6	125	63	28.8	0	1	0	1	0	0	0	0	0	0	0	0	0	0	1639	65.49	66.45	8.92	5.22	1.14	432	4.9	31.3	3.44362	11.2	NA	NA	NA	NA	0
94324	1	50	3	0	0	5	19.5	68	368	0.51	13.9	137	93	31.4	1	1	0	1	0	0	0	0	0	0	0	0	0	0	2323	90.85	76.2	12.08	4.47	1.32	99.9	5.5	33.7	3.5175	42.1	NA	NA	NA	NA	2
94325	1	62	5	2	2	1.11	17.6	72	439.286	0.64	14.3	105	57	44.6	0	0	0	0	0	1	1	NA	NA	NA	1	NA	NA	NA	1809	40.56	80.41	7.42	3.7	1.73	72.2	5.6	38.9	3.66099	0	38	NA	NA	NA	0
94326	0	55	3	0	1	5	16.3	69	421.194	4.55	14.4	113	67	33.3	1	0	0	0	1	0	0	0	0	0	0	0	0	0	2161	100	98.5	12.81	4.53	1.06	109	6.1	18.6	2.92316	0	NA	NA	NA	NA	2
94328	1	29	5	2	2	2.38	16.8	67	734.769	0.44	12.7	122	72	19.2	0	0	0	0	0	0	0	0	0	0	0	0	0	0	1911	70.81	74.58	11.89	4.03	2.48	20.2	5.1	29.5	3.38439	0	NA	NA	NA	NA	0
94330	1	57	3	0	1	2.65	24.9	80	362.571	2.09	15.2	153	76	37.3	0	0	1	1	0	0	0	0	0	0	0	0	0	0	1337	82.25	68.82	9.47	5.46	1.45	205	7.5	33.7	3.5175	0	NA	NA	NA	NA	0
94335	0	69	5	2	0	2.24	19.7	72	317.381	0.58	15	172	99	28.3	1	0	0	1	0	0	0	0	0	0	0	0	0	0	1911	70.81	74.58	11.89	7.27	1.32	111	5.9	32.9	3.49347	0	NA	NA	NA	NA	2
94336	0	74	2	2	2	1.73	17.6	75	472	1.81	15.1	113	65	28.3	0	0	1	1	0	1	NA	NA	NA	NA	NA	1	1	NA	1250	45.97	44.83	7.02	4.86	1.29	589	7.9	21.1	3.04927	0	30	NA	NA	NA	0
94337	0	44	5	2	2	1.13	10.2	74	702.5	4.64	16.7	165	110	46.2	0	0	0	0	0	0	0	0	0	0	0	0	0	0	6237	214.68	207.84	61.3	5.35	1.24	512	5.8	37.3	3.61899	0	NA	NA	NA	NA	0
94339	0	37	2	2	2	2.28	10.7	73	327.6	3.69	16.8	133	84	31.6	0	0	0	0	0	0	0	0	0	0	0	0	0	0	2333	128.05	93.69	15.06	6.03	0.91	405	5.6	32.6	3.48431	0	NA	NA	NA	NA	0
94340	0	25	3	0	1	4.68	11.8	74	568.8	1.48	17	123	63	34.4	1	1	0	0	0	0	0	0	0	0	0	0	0	0	2931	112.73	122.36	21.12	4.76	1.09	236	5.1	34.7	3.54674	11.2	NA	NA	NA	NA	1
94341	0	24	1	2	1	1.7	21.3	74	421.474	1.18	16	129	69	29.7	0	0	0	0	0	0	0	0	0	0	0	0	0	0	1911	70.81	74.58	11.89	5.77	1.47	144	5.7	30.3	3.41115	0	NA	NA	NA	NA	0
94342	1	57	4	1	2	5	10.4	71	365.75	1.26	12.1	129	82	34.6	0	0	0	1	1	0	0	0	0	0	0	0	0	0	562	26.5	23.3	2.38	5.22	1.34	65.2	5.7	36.6	3.60005	0	NA	NA	NA	NA	0
94343	0	71	1	2	1	2.73	7.9	67	630	0.45	13.8	106	53	34	1	0	1	0	0	0	0	0	0	0	0	0	0	0	3613	83.36	152.79	15.39	2.66	1.32	125	8	44.4	3.79324	0	NA	NA	NA	NA	2
94345	0	65	3	0	1	1.69	17.4	67	723.529	10.94	14.1	170	73	43.6	1	0	1	1	0	0	0	0	0	0	0	0	0	0	2141	81.8	114.65	12.81	4.76	1.16	332	8.4	26	3.2581	0	NA	NA	NA	NA	2
94350	0	54	5	2	2	3.66	18.6	79	416	0.51	16.1	106	77	28.5	0	1	0	0	0	0	0	0	0	0	0	0	0	0	3493	84.16	174.63	12.37	6.65	1.27	220	5.8	40.1	3.69138	56.2	NA	NA	NA	NA	0
94352	1	70	2	2	1	2.04	12	77	414	2.02	14	122	72	28.7	1	0	1	0	1	0	0	0	0	0	0	0	0	0	1342	24.71	38.74	7.71	5.53	0.91	81.7	7.7	52.3	3.957	0	NA	NA	NA	NA	2
94356	0	58	4	1	2	2.24	13.3	77	678.933	5.69	13.9	121	63	27.5	1	1	0	0	0	0	0	0	0	0	0	0	0	0	7627	354.18	373.09	38.25	6.52	2.3	79.9	5	61.5	4.11904	22.3	NA	NA	NA	NA	1
94359	0	36	1	2	0	0.87	13.8	77	351.448	0.97	15.5	142	95	30.9	1	0	0	0	0	0	0	0	0	0	0	0	0	0	2685	194.62	112.98	17.54	7.86	1.06	223	5.7	27.7	3.32143	0	NA	NA	NA	NA	1
94360	0	44	2	2	1	1.4	24	80	687.5	2.75	19.9	137	92	31.7	1	0	0	1	1	0	0	0	0	0	0	0	0	0	1687	75.08	44.35	23.57	4.19	0.91	223	5	72.1	4.27805	0	NA	NA	NA	NA	1
94362	0	79	3	0	2	2.79	9.7	68	323.444	1.07	15.7	175	67	27.8	1	1	1	1	0	0	0	0	0	0	0	0	0	0	3849	154.98	201.7	15.99	4.76	0.72	112	7.7	32.2	3.47197	19	NA	NA	NA	NA	2
94365	0	22	4	1	2	0.24	19	69	397.652	0.43	13.5	126	71	20.2	1	0	0	0	0	0	0	0	0	0	0	0	0	0	722	17.49	29.74	5.38	3.75	1.14	83.1	4.5	36.8	3.6055	0	NA	NA	NA	NA	1
94366	0	25	5	2	2	1.32	26.3	80	234	0.57	14.2	122	72	25.3	0	0	0	0	0	0	0	0	0	0	0	0	0	0	2681	162.82	116.28	15.53	4.99	1.53	267	5.1	30.4	3.41444	0	NA	NA	NA	NA	0
94368	1	33	3	0	2	5	13.3	69	1313.68	1.67	12.4	122	72	25.5	1	0	1	0	0	0	0	0	0	0	0	0	0	0	1911	70.81	74.58	11.89	2.66	1.06	43.5	8.2	26.3	3.26957	0	NA	NA	NA	NA	1
94372	0	68	4	1	2	3.87	11.6	74	354.545	2.67	14.6	125	84	36.8	0	0	0	1	0	0	0	0	0	0	0	0	0	0	3102	147.62	179.65	22.1	4.91	1.01	296	8.3	33	3.49651	0	NA	NA	NA	NA	0
94373	1	80	3	0	0	1.54	11.5	67	442.111	2.42	13.6	113	45	25.6	0	0	0	0	0	0	0	0	0	0	0	0	0	0	1556	65.09	65.75	17.62	5.56	1.71	165	5.4	38.4	3.64806	0	NA	NA	NA	NA	0
94374	1	52	1	2	2	2.47	9	73	259.6	4.02	15.1	127	69	34.5	0	0	0	0	0	0	0	0	0	0	0	0	0	0	3043	160.41	90.33	13.99	7.99	1.37	31.7	5.4	37.5	3.62434	0	NA	NA	NA	NA	0
94375	1	30	5	2	2	3.18	12.7	78	468.839	5.12	14.6	128	78	21.7	0	1	0	1	0	0	0	0	0	0	0	0	0	0	1023	34.63	34.92	4.8	5.9	1.84	50.1	5.1	29	3.3673	14	NA	NA	NA	NA	0
94376	0	66	4	1	2	2.9	18.1	65	375	6.04	16.5	137	77	28.3	1	0	0	0	0	0	0	0	0	0	0	0	0	0	4434	91.41	168.99	24.98	3.34	1.47	135	6.2	29.6	3.38777	0	NA	NA	NA	NA	1
94377	0	33	3	0	2	2.24	21.9	79	394.091	6.35	15.2	153	72	50	1	0	0	0	0	0	0	0	0	0	0	0	0	0	4025	114.01	156.81	18.54	5.04	1.58	153	5.9	50.5	3.92197	0	NA	NA	NA	NA	1
94379	1	24	3	0	1	2.55	7.3	67	413.276	4.3	13.9	108	66	28.8	1	0	0	0	1	0	0	0	0	0	0	0	0	0	637	22.04	22.3	4.28	4.76	1.06	22.6	5.4	36.6	3.60005	0	NA	NA	NA	NA	2
94380	0	63	4	1	1	0.15	10.2	76	244.464	2.17	13.5	158	80	28.6	0	0	0	0	0	0	0	0	0	0	0	0	0	0	1518	66.26	56.7	11	4.32	0.96	288	5.9	61.5	4.11904	0	NA	NA	NA	NA	0
94382	1	32	3	0	2	1	12	71	344.118	1.22	14.8	93	61	19	0	1	0	0	0	0	0	0	0	0	0	0	0	0	1487	55.19	78.06	8.5	5.17	2.04	20.9	4.8	53.5	3.97968	14	NA	NA	NA	NA	0
94385	1	48	5	2	0	2.45	11.5	70	170.238	1.14	12.4	97	69	26.4	0	0	0	0	0	0	0	0	0	0	0	0	0	0	1911	70.81	74.58	11.89	4.47	1.34	10.4	5.4	32.2	3.47197	0	NA	NA	NA	NA	0
94386	1	71	3	0	2	1.65	7.5	69	699.583	13.04	15.2	168	82	38.4	0	0	1	1	0	0	0	0	0	0	0	0	0	0	1492	77.9	61.18	10.22	6.23	1.22	503	7	39.1	3.66612	0	NA	NA	NA	NA	0
94387	1	39	4	1	1	4.12	8.1	79	528.828	8.37	13.5	133	78	49.3	0	0	0	0	0	0	0	0	0	0	0	0	0	0	3157	158.8	154.43	13.19	5.46	1.4	99.5	5.8	31	3.43399	0	NA	NA	NA	NA	0
94388	1	33	4	1	2	0.8	14.1	70	168.333	0.46	12.3	109	69	33.1	0	0	0	0	0	0	0	0	0	0	0	0	0	0	2848	143.76	134.7	22.57	3.78	1.97	15.9	5.2	26.9	3.29213	0	NA	NA	NA	NA	0
94390	1	72	5	2	2	1.15	16.7	80	98.5714	0.86	12.3	158	57	35.2	0	0	0	1	0	1	NA	NA	NA	NA	NA	NA	NA	NA	1590	46.24	48.13	12.74	3.44	1.03	121	7	35.2	3.56105	0	37	NA	NA	NA	0
94392	0	25	4	1	2	3.23	14.7	76	333.529	0.73	14.1	109	54	25.1	0	0	0	0	0	0	0	0	0	0	0	0	0	0	3708	126.18	159.51	16.91	3.78	1.27	163	5.2	29	3.3673	0	NA	NA	NA	NA	0
94398	1	39	4	1	0	0.81	5	75	533.8	3.13	8.9	158	108	30.3	1	0	0	0	0	0	0	0	0	0	0	0	0	0	1123	61.52	50.88	8.77	3.93	1.24	4.88	6.1	137	4.91998	0	NA	NA	NA	NA	1
94399	1	62	2	2	2	3.09	17.9	69	287	3.92	15	127	63	34.5	1	0	1	0	0	0	0	0	0	0	0	0	0	0	1984	82.43	96.27	14.2	6.41	1.14	329	10	36.6	3.60005	0	NA	NA	NA	NA	2
94401	0	57	3	0	2	3.43	17.6	66	508.4	1.67	14.2	133	85	25.5	0	1	0	0	0	0	0	0	0	0	0	0	0	0	3335	104.77	132.44	21.15	6.44	1.22	183	5.9	31.2	3.44042	14	NA	NA	NA	NA	0
94404	1	80	3	0	1	2.07	14.1	69	503.182	0.92	13.3	129	74	22.3	1	1	0	1	1	0	0	0	0	0	0	0	0	0	1941	65.91	70.42	14.58	6.1	1.27	284	5.7	39.1	3.66612	8.6	NA	NA	NA	NA	2
94405	1	39	3	0	0	0.78	25.1	74	673.077	2.47	15	104	66	31.1	1	1	1	0	0	1	1	NA	NA	1	NA	NA	NA	NA	1851	44.76	62.63	27.57	4.16	1.29	115	4.7	26	3.2581	33.5	28	NA	NA	NA	1
94407	1	76	3	0	2	5	14.7	63	513.85	2.44	13.3	113	57	31.3	0	0	0	1	0	0	0	0	0	0	0	0	0	0	1540	62.24	62.78	11.56	5.02	1.37	82.1	5.8	39.4	3.67377	0	NA	NA	NA	NA	0
94408	0	72	3	0	2	2.59	12.4	72	620.542	1.03	14.6	139	79	19.6	1	0	0	0	0	1	NA	NA	NA	NA	NA	NA	NA	NA	2451	120.1	99.24	15.89	3.83	1.37	81.8	6	42.7	3.7542	0	25	NA	NA	NA	1
94409	0	23	2	2	0	0.41	16.3	77	433.333	0.2	13.8	102	80	19.5	0	0	0	0	0	0	0	0	0	0	0	0	0	0	3476	80.51	121.47	18.41	3.47	1.29	98.2	5.2	30.3	3.41115	0	NA	NA	NA	NA	0
94412	0	80	1	2	0	0.61	8.4	79	196	33.41	12.9	148	62	27.9	1	0	0	0	0	0	0	0	0	0	0	0	0	0	1911	70.81	74.58	11.89	4.99	1.09	74.3	5.3	46.4	3.8373	0	NA	NA	NA	NA	2
94414	0	32	4	1	0	0.12	11.8	72	761.655	4.76	14.8	124	75	41	1	0	0	0	0	0	0	0	0	0	0	0	0	0	582	25.88	22.45	5.76	5.92	1.09	132	6.3	41.4	3.72328	0	NA	NA	NA	NA	1
94415	0	37	2	2	2	1.22	12.5	69	494.667	0.57	15.6	125	81	23.1	1	0	0	0	0	0	0	0	0	0	0	0	0	0	2261	92.1	93.56	11.53	4.16	1.09	343	5.5	35.9	3.58074	0	NA	NA	NA	NA	1
94416	1	28	3	0	1	1.96	9	79	460	8.56	13.2	119	79	33.4	1	0	0	1	0	0	0	0	0	0	0	0	0	0	2983	38.62	92.35	9.4	5.17	0.88	24.9	5.1	54.8	4.00369	0	NA	NA	NA	NA	1
94418	1	76	3	0	1	2.59	16.8	74	770.727	4.48	14.8	150	57	35.7	1	0	0	1	0	0	0	0	0	0	0	0	0	0	1894	81.8	86.16	13.32	6.1	1.09	121	6.3	56.4	4.03247	0	NA	NA	NA	NA	2
94420	1	80	3	0	0	1.33	13.4	65	562.692	0.96	12.5	131	33	30.2	0	0	0	1	0	1	NA	NA	NA	NA	NA	NA	NA	NA	1860	50.39	89.37	8.87	3.96	1.16	88	6	31	3.43399	0	32	NA	NA	NA	0
94421	1	75	5	2	1	4.62	10.7	76	420	2.63	15.1	137	72	25.7	0	0	0	1	0	0	0	0	0	0	0	0	0	0	1911	70.81	74.58	11.89	3.93	1.5	289	6.4	37.9	3.63495	0	NA	NA	NA	NA	0
94425	1	75	3	0	2	3.08	17.2	69	356.4	2.26	13.2	94	60	30.1	0	0	0	1	0	1	1	NA	NA	1	NA	NA	NA	NA	1752	134.23	51.11	8.72	4.45	1.4	52.9	6.3	32.7	3.48738	0	28	NA	NA	NA	0
94427	1	49	5	2	2	1.94	12.5	78	522.667	5.9	12.7	113	70	37.3	0	0	1	0	0	0	0	0	0	0	0	0	0	0	1911	70.81	74.58	11.89	3.98	0.88	28.2	5.5	46.6	3.8416	0	NA	NA	NA	NA	0
94428	0	60	2	2	2	2.07	20.6	76	352.821	9.11	17.3	207	96	42	0	0	1	1	0	0	0	0	0	0	0	0	0	0	2450	121.34	94.84	12.85	4.55	1.16	116	12.8	60.3	4.09933	0	NA	NA	NA	NA	0
94429	0	61	4	1	2	5	9.1	77	575.1	8.49	12.6	147	89	39.5	0	0	0	1	0	0	0	0	0	0	0	0	0	0	1558	74.11	72.02	14.26	2.74	1.22	115	6.1	69.1	4.23555	0	NA	NA	NA	NA	0
94430	1	25	5	2	2	2.2	8.1	74	606.125	12.49	12.7	122	77	52.5	0	1	0	0	0	0	0	0	0	0	0	0	0	0	2538	66.5	88.01	16.87	3.8	0.78	66.7	6.9	34.9	3.55249	13.4	NA	NA	NA	NA	0
94431	0	47	3	0	2	2.55	16.3	69	728.167	10.42	15.8	122	72	55.3	1	0	1	1	0	0	0	0	0	0	0	0	0	0	1976	73.5	101.64	19.21	3.67	1.09	536	7.6	34.9	3.55249	0	NA	NA	NA	NA	2
94432	1	71	1	2	2	4.48	18.1	75	292.355	2.2	16.9	123	67	36.1	1	0	1	1	0	1	1	NA	1	NA	NA	NA	NA	NA	2284	90.28	94.46	24.58	5.48	1.37	57.9	7.4	32	3.46574	0	15	NA	NA	NA	1
94433	0	46	4	1	0	1.06	11.5	72	217.63	2.4	14.1	175	74	36.2	0	0	1	1	0	0	0	0	0	0	0	0	0	0	2674	140.11	129.19	23.55	5.02	1.11	138	9.2	39.8	3.68387	0	NA	NA	NA	NA	0
94434	1	26	5	2	2	2.43	21.5	71	838	0.48	11.3	99	58	27.3	0	0	0	0	0	0	0	0	0	0	0	0	0	0	1185	36.25	36.49	9.01	4.42	1.34	8.78	5.2	46.4	3.8373	0	NA	NA	NA	NA	0
94436	1	31	4	1	0	0.82	7.3	71	769.412	1.45	13.3	115	75	30.9	1	0	0	0	0	0	0	0	0	0	0	0	0	0	992	45.55	53.19	3.8	4.58	1.22	12.6	5.4	43.3	3.76815	0	NA	NA	NA	NA	1
94438	0	80	2	2	2	2.88	12.5	73	395.25	24.93	14.7	122	72	24	1	0	0	0	1	0	0	0	0	0	0	0	0	0	1567	87.19	40.24	11.6	4.5	1.16	225	6.4	30.4	3.41444	0	NA	NA	NA	NA	2
94443	0	32	1	2	0	2.39	13.4	73	525.353	1.69	14.3	98	70	30.2	1	0	0	0	0	0	0	0	0	0	0	0	0	0	1518	53.58	44.99	8.02	5.04	1.42	198	5.4	33.4	3.50856	0	NA	NA	NA	NA	1
94444	1	78	4	1	0	1.68	13.3	72	369.769	0.73	13.8	122	72	41	1	0	1	1	1	0	0	0	0	0	0	0	0	0	2649	78.14	139.71	24.11	4.37	1.53	74.3	6.3	46.6	3.8416	0	NA	NA	NA	NA	2
94445	0	53	3	0	1	2.47	13.6	68	334.286	2.2	15.1	115	86	24.6	1	0	0	0	0	0	0	0	0	0	0	0	0	0	2842	98.56	154.02	21.87	5.22	1.14	193	5.3	26.7	3.28466	0	NA	NA	NA	NA	2
94446	1	28	2	2	0	0.73	14.1	69	496	2.1	13.7	125	69	31.8	0	0	0	0	0	0	0	0	0	0	0	0	0	0	1809	104.99	30.3	16.27	5.64	1.32	51.1	5.3	33.5	3.51155	0	NA	NA	NA	NA	0
94448	0	41	3	0	1	3.06	10.2	70	753.792	6.36	15.8	119	87	34	0	0	0	1	0	0	0	0	0	0	0	0	0	0	1817	80.65	71.78	7.39	3.23	0.7	85	5.8	47.7	3.86493	0	NA	NA	NA	NA	0
94450	0	30	1	2	1	1.36	7.9	77	561.538	3.47	16	123	88	32.6	0	0	0	0	0	0	0	0	0	0	0	0	0	0	1911	70.81	74.58	11.89	4.89	0.54	284	5.8	45.5	3.81771	0	NA	NA	NA	NA	0
94453	1	20	3	0	2	1.77	12.7	66	324.968	2.18	14.5	97	53	31	1	0	0	0	0	0	0	0	0	0	0	0	0	0	1617	40.36	68.45	6.45	4.01	1.14	29.2	5	32.5	3.48124	0	NA	NA	NA	NA	1
94457	1	46	3	0	2	4.81	22.2	66	144.947	0.7	13	101	63	25	0	0	0	0	0	0	0	0	0	0	0	0	0	0	2009	68.8	85.17	24.85	4.29	1.73	148	5.6	28.8	3.36038	0	NA	NA	NA	NA	0
94458	0	56	5	2	2	5	14	71	744.188	4.28	13	117	70	33.9	0	0	1	1	0	0	0	0	0	0	0	0	0	0	1911	70.81	74.58	11.89	4.37	1.06	25.4	8.1	64.4	4.16511	0	NA	NA	NA	NA	0
94459	1	52	4	1	0	1.09	16.8	73	263.425	3.67	14.2	151	87	50.4	1	0	0	1	1	0	0	0	0	0	0	0	0	0	1629	38.08	77.69	10.73	5.3	0.88	65.6	6.8	37.4	3.62167	0	NA	NA	NA	NA	2
94460	1	61	4	1	2	5	8.4	80	195.621	2.28	12	107	63	28.6	0	1	0	0	0	0	0	0	0	0	0	0	0	0	1220	24.57	55.63	5.86	4.84	1.5	178	5.4	43.5	3.77276	0.3	NA	NA	NA	NA	0
94464	0	77	3	0	2	5	19.5	62	423.667	2.01	16	117	67	37.2	0	1	1	1	1	1	NA	NA	NA	NA	NA	1	1	NA	1984	61.33	90.41	7.88	5.48	1.09	668	6.3	42.1	3.74005	57.1	30	NA	NA	NA	0
94465	0	31	5	2	0	4.31	12.7	67	720.882	0.57	14.9	127	53	30.9	1	1	0	0	0	0	0	0	0	0	0	0	0	0	7021	213.77	274.39	42.39	6	1.78	51.4	5.3	35.9	3.58074	44.6	NA	NA	NA	NA	2
94469	1	37	5	2	2	5	12	71	372.364	1.48	12.9	121	79	38.7	0	0	0	0	0	0	0	0	0	0	0	0	0	0	840	57.92	31.97	3.93	4.65	1.53	62.9	5.4	34.9	3.55249	0	NA	NA	NA	NA	0
94473	1	73	3	0	2	1.92	19	71	252	0.52	14.6	121	70	30.8	0	1	0	0	0	0	0	0	0	0	0	0	0	0	1860	65.95	38.49	48.29	6.78	1.22	80.2	5.6	30.2	3.40784	21.6	NA	NA	NA	NA	0
94474	0	55	3	0	1	3.66	13.6	66	444	2.65	14.4	136	83	23	0	0	1	1	0	0	0	0	0	0	0	0	0	0	2129	89.51	92.22	18.66	3.44	0.96	72.2	10	28.4	3.34639	0	NA	NA	NA	NA	0
94475	1	26	1	2	1	2.72	20.2	66	379.312	1.64	14.6	122	72	18.7	0	0	0	0	0	0	0	0	0	0	0	0	0	0	1574	57.53	36.93	23.16	4.45	1.97	33.1	5	53.3	3.97594	0	NA	NA	NA	NA	0
94477	1	58	4	1	1	3.92	18.6	74	193.562	2.01	13.3	130	77	17.1	0	0	0	0	0	0	0	0	0	0	0	0	0	0	1582	51.46	85.07	11.85	4.73	1.33	151	5.7	49.3	3.89792	0	NA	NA	NA	NA	0
94478	1	37	4	1	2	0.91	2.7	77	272	0.6	9	111	65	22.6	0	0	0	0	0	0	0	0	0	0	0	0	0	0	1106	56.59	30.48	10.41	3.96	2.2	9.04	5.6	163	5.09375	0	NA	NA	NA	NA	0
94479	1	64	3	0	1	0.91	16.3	72	398	7.46	19.1	122	79	33	1	0	0	1	0	0	0	0	0	0	0	0	0	0	1289	51.19	55.97	4.14	5.72	1.19	288	5.3	37.9	3.63495	0	NA	NA	NA	NA	2
94481	1	31	5	2	0	1.7	6.1	71	949.677	10.36	13	122	78	33.1	1	0	0	0	0	0	0	0	0	0	0	0	0	0	1933	36.39	89.62	12.98	4.91	1.22	30	6	48.9	3.88978	0	NA	NA	NA	NA	1
94483	1	74	5	2	2	5	19.3	67	316.5	1.24	13.8	148	74	31.3	0	1	0	1	0	0	0	0	0	0	0	0	0	0	1369	55.34	50.04	6.62	6.1	2.35	218	5.2	23.2	3.14415	32.1	NA	NA	NA	NA	0
94486	1	44	4	1	2	0.77	22.6	70	483.333	1.11	14.1	108	73	31.2	1	0	1	1	0	0	0	0	0	0	0	0	0	0	2678	62.56	96.33	11.98	3.52	0.91	164	6.6	37.3	3.61899	0	NA	NA	NA	NA	1
94487	0	29	4	1	2	1.05	15.8	72	209.13	1.52	15	109	65	30.2	0	0	0	0	0	0	0	0	0	0	0	0	0	0	1507	72.94	54.68	5.69	3.75	1.6	168	5.3	47.4	3.85862	0	NA	NA	NA	NA	0
94488	1	38	2	2	0	0.68	8.6	70	702.545	1.71	12.5	105	73	26.4	0	0	0	0	0	0	0	0	0	0	0	0	0	0	1794	89.56	75.72	12.39	4.6	1.16	41	5.8	33.9	3.52342	0	NA	NA	NA	NA	0
94490	1	64	3	0	1	1.17	28.3	70	260	0.72	12.4	109	63	24	1	0	0	1	0	0	0	0	0	0	0	0	0	0	816	32.21	24.48	18.52	6.21	1.86	99.7	5.5	24.4	3.19458	0	NA	NA	NA	NA	2
94493	0	63	1	2	0	2.19	10.2	65	605.214	2.32	16	121	79	27.7	0	0	0	0	0	1	NA	NA	NA	NA	NA	NA	NA	NA	1618	68.04	62.78	14.05	5.33	1.29	128	6.2	36.2	3.58906	0	99	NA	NA	NA	0
94497	0	45	5	2	1	0.4	18.3	82	700.909	4.04	14.6	101	65	28.9	1	0	0	1	0	0	0	0	0	0	0	0	0	0	3613	57.37	81.1	7.71	5.17	1.24	70.4	6.1	22.4	3.10906	0	NA	NA	NA	NA	1
94499	0	62	4	1	1	2.65	29	74	206.182	2.69	13.7	161	68	22.4	0	0	0	1	1	0	0	0	0	0	0	0	0	0	3444	87.25	143.09	23.17	4.76	1.73	134	5.1	30.8	3.42751	0	NA	NA	NA	NA	0
94500	1	60	4	1	2	1.32	10.9	81	834.25	6.76	11.6	144	74	35.5	0	0	0	1	1	0	0	0	0	0	0	0	0	0	1392	52.09	84.04	17.18	3.28	1.11	349	6.6	39.5	3.6763	0	NA	NA	NA	NA	0
94501	1	41	5	2	2	4.08	3	76	1123.21	4.11	11.4	125	76	35.3	0	0	0	0	0	0	0	0	0	0	0	0	0	0	1828	53.16	64.49	8.7	4.6	1.42	5.93	6	83.2	4.42125	0	NA	NA	NA	NA	0
94503	1	52	4	1	1	2.16	19	69	186.667	1.08	13.3	122	56	19.2	1	0	0	0	0	0	0	0	0	0	0	0	0	0	2322	79.72	119.75	9.61	5.72	2.17	30.6	5.3	58.3	4.0656	0	NA	NA	NA	NA	1
94504	0	28	4	1	1	1.63	11.8	73	396	0.61	15	127	89	24.3	0	0	0	0	0	0	0	0	0	0	0	0	0	0	556	33.21	34.76	5.02	4.55	1.19	166	4.6	77.2	4.3464	0	NA	NA	NA	NA	0
94507	0	34	4	1	1	1.26	16.5	76	742.28	14.87	13.8	137	73	45.4	0	0	0	0	0	0	0	0	0	0	0	0	0	0	2197	103.37	106.4	13.69	5.48	1.03	348	5.3	23.1	3.13983	0	NA	NA	NA	NA	0
94508	1	34	4	1	2	4.86	21	75	288.55	2.44	13.1	111	69	30.8	0	0	0	0	0	0	0	0	0	0	0	0	0	0	826	24.67	31.1	8.86	4.81	1.55	45.7	5.6	26.2	3.26576	0	NA	NA	NA	NA	0
94509	1	53	3	0	2	4.78	11.3	74	476.348	1.04	13.5	112	75	26.3	0	0	0	0	0	0	0	0	0	0	0	0	0	0	1221	32.04	39.24	18.12	7.11	1.63	87.7	5.6	34.1	3.5293	0	NA	NA	NA	NA	0
94510	1	49	3	0	1	5	16.8	72	559.36	1.6	13.4	112	61	32.6	0	0	0	0	0	0	0	0	0	0	0	0	0	0	3001	179.84	98.7	20.79	4.78	1.29	448	5.6	23	3.13549	0	NA	NA	NA	NA	0
94512	1	43	1	2	0	1.22	2.7	76	1588.76	5.32	8.9	109	65	25.3	0	0	1	1	0	0	0	0	0	0	0	0	0	0	2533	106.38	116.58	13.64	4.73	1.55	2.91	7.9	269	5.59471	0	NA	NA	NA	NA	0
94515	1	58	2	2	0	1.82	12.5	74	353.778	7.86	12.9	164	87	44.6	0	0	0	1	0	0	0	0	0	0	0	0	0	0	1911	70.81	74.58	11.89	5.02	1.42	112	9.4	34	3.52636	0	NA	NA	NA	NA	0
94519	0	59	3	0	2	3.67	19.3	75	318.462	1.4	15	128	93	29.6	0	0	0	0	0	0	0	0	0	0	0	0	0	0	3488	144.14	166.78	20.31	5.64	1.16	318	5.8	31.6	3.45316	0	NA	NA	NA	NA	0
94522	0	60	4	1	1	0.62	14.9	73	1300.24	10.46	15	122	72	31.8	1	1	0	1	0	0	0	0	0	0	0	0	0	0	4928	131.03	156.52	18.44	5.84	1.63	248	5.6	36.5	3.59731	205.1	NA	NA	NA	NA	1
94523	1	65	4	1	2	2.46	10.4	70	561	2.43	13.9	139	75	26.5	0	0	0	1	0	0	0	0	0	0	0	0	0	0	962	30	35.93	5.27	4.76	1.24	82.1	5.8	42.8	3.75654	0	NA	NA	NA	NA	0
94525	1	66	3	0	1	1.52	5.7	73	785	33.59	11.6	122	72	33.4	1	0	1	1	0	0	0	0	0	0	0	0	0	0	2723	96.58	103.66	12.04	4.63	1.76	56.7	5.5	45.8	3.82428	0	NA	NA	NA	NA	2
94526	0	37	4	1	0	0.2	14.9	74	336	2.16	15.6	122	72	31.9	1	1	0	0	0	0	0	0	0	0	0	0	0	0	2917	114.73	130.11	15.48	6	2.22	180	5.4	44.5	3.79549	92.2	NA	NA	NA	NA	1
94527	0	36	1	2	0	1.95	36.9	73	760.842	0.35	15.7	122	72	24.8	0	0	0	0	0	0	0	0	0	0	0	0	0	0	1911	70.81	74.58	11.89	3.62	0.83	298	5.2	23	3.13549	0	NA	NA	NA	NA	0
94528	0	34	5	2	1	1.02	14.1	72	902.133	8.42	14.7	145	95	60.6	0	0	0	1	0	0	0	0	0	0	0	0	0	0	2361	87.64	85.54	17.87	4.45	1.06	409	5	45.4	3.81551	0	NA	NA	NA	NA	0
94530	0	22	4	1	2	3.4	19.9	70	434.444	0.44	14.8	111	69	26.1	0	0	0	0	0	0	0	0	0	0	0	0	0	0	763	9.83	24.92	1.38	3.96	1.27	114	5.1	36.6	3.60005	0	NA	NA	NA	NA	0
94531	1	34	1	2	2	1.52	10.6	66	389.125	1.57	13.8	115	65	29.6	0	0	0	0	0	0	0	0	0	0	0	0	0	0	1381	36.94	59.25	5.78	4.89	1.22	37.4	5.7	36.6	3.60005	0	NA	NA	NA	NA	0
94532	1	36	1	2	2	0.8	15.4	73	408.75	1.65	13	109	65	30.2	0	0	0	0	0	0	0	0	0	0	0	0	0	0	2436	86.44	104.13	14.43	5.22	1.11	7.96	5	40.4	3.69883	0	NA	NA	NA	NA	0
94534	0	80	3	0	2	1.35	13.6	76	268.652	12.95	13.2	132	53	28.3	0	0	1	0	0	0	0	0	0	0	0	0	0	0	2737	58.27	134.61	15.78	4.91	1.19	39.9	6.6	60.5	4.10264	0	NA	NA	NA	NA	0
94539	1	55	3	0	2	0.09	12.5	68	172.439	10.74	13	124	74	30.4	1	0	0	0	0	0	0	0	0	0	0	0	0	0	886	29.74	50.37	3.7	4.86	1.4	114	5.5	33.5	3.51155	0	NA	NA	NA	NA	1
94541	1	79	4	1	1	4.56	10.6	73	333.955	0.37	12.3	116	60	21.7	0	0	0	1	0	0	0	0	0	0	0	0	0	0	1078	27.34	20.12	4.88	3.18	1.6	106	5.7	42.8	3.75654	0	NA	NA	NA	NA	0
94542	0	30	4	1	2	5	26.1	68	206.765	0.41	13.7	122	72	28.7	0	0	0	0	0	0	0	0	0	0	0	0	0	0	1911	70.81	74.58	11.89	3.52	2.3	180	5.5	15.3	2.72785	0	NA	NA	NA	NA	0
94547	1	67	4	1	1	1.81	34.4	69	256	0.93	14.1	137	69	20.3	1	0	0	0	0	0	0	0	0	0	0	0	0	0	2073	68.94	92.34	11.78	4.14	2.22	70.7	6.1	20.4	3.01553	0	NA	NA	NA	NA	1
94549	0	80	3	0	0	1.75	16.8	66	567.647	1.47	12.6	135	70	28.2	1	0	0	1	1	0	0	0	0	0	0	0	0	0	3374	114.47	163.8	15.83	4.16	1.71	94.6	5.9	24.4	3.19458	0	NA	NA	NA	NA	2
94552	1	56	5	2	2	3.69	9.3	79	404.727	6.03	12	139	87	24.3	0	0	0	0	0	0	0	0	0	0	0	0	0	0	1164	34.34	31.32	8.2	4.99	1.09	11.1	6.1	62.8	4.13996	0	NA	NA	NA	NA	0
94554	0	69	1	2	0	4.07	19.3	73	253.75	1.31	14.7	147	73	27	1	0	1	1	0	0	0	0	0	0	0	0	0	0	1400	65.82	63.73	11.98	4.01	1.4	59.3	6.9	30	3.4012	0	NA	NA	NA	NA	2
94557	1	35	4	1	2	1.71	9.7	69	209.091	4.14	12.7	138	89	34.7	0	0	0	1	1	0	0	0	0	0	0	0	0	0	2223	50.62	112.06	12.35	3.39	1.24	31.7	5.5	30.6	3.421	0	NA	NA	NA	NA	0
94559	0	41	1	2	1	5	10.6	74	568.333	4.06	15.9	121	77	36.8	0	0	0	1	0	0	0	0	0	0	0	0	0	0	4301	113.29	153.19	12.83	3.8	0.75	154	5.3	38.2	3.64284	0	NA	NA	NA	NA	0
94560	1	24	3	0	2	2.13	9.9	80	927.333	11.63	14.8	106	79	35.8	0	0	0	0	0	0	0	0	0	0	0	0	0	0	4808	157.14	261.56	41.2	3.54	0.93	200	5.9	27.4	3.31054	0	NA	NA	NA	NA	0
94564	1	80	2	2	0	2.07	24.9	64	949.412	0.99	13.6	137	44	25.1	0	0	0	1	1	0	0	0	0	0	0	0	0	0	1410	65.69	68.85	17.46	3.8	1.78	40.8	5.6	34	3.52636	0	NA	NA	NA	NA	0
94565	1	45	2	2	1	0.1	10.2	73	714.667	2.85	12.4	147	91	33.3	0	0	0	1	0	0	0	0	0	0	0	0	0	0	2592	76.08	84.74	17.6	5.95	1.34	9.94	5.1	64.7	4.16976	0	NA	NA	NA	NA	0
94568	1	60	1	2	0	0.57	26.5	72	620	4.31	13.2	135	76	29.8	0	0	0	1	0	0	0	0	0	0	0	0	0	0	1769	69.06	65.27	9.93	6.18	1.11	318	6	17.9	2.8848	0	NA	NA	NA	NA	0
94569	1	27	3	0	2	4.04	7.9	75	847.125	0.42	14	111	72	25.2	0	0	0	0	0	0	0	0	0	0	0	0	0	0	2069	66.31	89.45	13.57	4.47	1.45	26.8	4.7	46.1	3.83081	0	NA	NA	NA	NA	0
94570	0	48	3	0	0	1.15	19.2	71	350.222	8.05	17	117	76	33.7	1	0	1	0	0	0	0	0	0	0	0	0	0	0	3204	84.9	118.92	22.84	11.15	0.59	388	8.9	34.5	3.54096	0	NA	NA	NA	NA	1
94571	1	80	3	0	2	3.4	18.1	65	753.667	1.13	15.6	127	52	25.6	1	0	0	1	0	0	0	0	0	0	0	0	0	0	1774	47.01	86.86	9.33	5.77	1.78	95.4	5.6	43.5	3.77276	0	NA	NA	NA	NA	2
94576	1	33	1	2	1	0.58	12.5	73	625.4	13.4	12.4	115	80	37.1	0	0	0	0	0	0	0	0	0	0	0	0	0	0	1757	73.26	52.59	11.92	3.49	1.29	94.1	5.3	34.7	3.54674	0	NA	NA	NA	NA	0
94577	1	30	3	0	2	5	19.9	74	774.2	0.39	14.5	105	65	19.6	0	0	0	0	0	0	0	0	0	0	0	0	0	0	872	45.52	56.4	6.58	7.76	1.73	57.8	4.8	35	3.55535	0	NA	NA	NA	NA	0
94578	0	71	3	0	2	1.73	20.6	69	357	2.02	15.3	127	58	26.6	1	0	1	1	0	1	NA	NA	NA	NA	NA	NA	NA	NA	2118	92.53	97.26	12.66	4.03	1.06	135	5.5	37.3	3.61899	0	19	NA	NA	NA	2
94579	0	52	4	1	1	0.62	12.9	68	159.545	1.87	13.6	111	78	27.8	0	0	1	0	0	0	0	0	0	0	0	0	0	0	1571	52.17	70.2	10.57	5.04	1.06	83.3	6.3	43.3	3.76815	0	NA	NA	NA	NA	0
94583	0	80	3	0	0	1.19	7	68	3250.71	6.68	12.6	143	55	21.3	1	0	0	1	0	1	NA	NA	NA	NA	NA	NA	NA	NA	2291	132.69	90.25	25.49	4.5	1.76	30.6	6.1	25.5	3.23868	0	32	NA	NA	NA	1
94586	1	74	3	0	2	5	21.5	68	1128.87	2.34	16.2	123	63	20	1	1	0	1	0	0	0	0	0	0	0	0	0	0	1712	77.09	75.78	20.81	6.49	2.12	31.4	4.9	34.1	3.5293	19	NA	NA	NA	NA	2
94589	0	33	3	0	2	2.85	24.5	78	474.565	1.39	14.8	123	78	30.4	0	0	0	0	0	0	0	0	0	0	0	0	0	0	3034	139.15	141.25	19.49	4.94	0.91	214	5.5	33.7	3.5175	0	NA	NA	NA	NA	0
94590	1	65	2	2	0	0.23	17.4	77	339.077	3.58	13.2	151	71	34.1	0	0	0	1	0	0	0	0	0	0	0	0	0	0	649	18.29	16.8	1.36	5.79	1.16	30.8	5.7	35.2	3.56105	0	NA	NA	NA	NA	0
94595	0	28	5	2	2	1.24	18.6	77	344.815	2.22	14.5	116	57	21.7	1	0	0	0	0	0	0	0	0	0	0	0	0	0	1911	70.81	74.58	11.89	2.72	1.11	68.8	5	34.6	3.54385	0	NA	NA	NA	NA	2
94596	0	45	3	0	2	3.1	12.5	70	430.556	2.87	16	119	79	24.1	0	1	0	0	0	0	0	0	0	0	0	0	0	0	2561	117.27	79.6	7.45	4.19	1.37	95.6	5.3	28.6	3.35341	28.4	NA	NA	NA	NA	0
94605	0	42	4	1	1	3.08	6.1	57	285.185	2.86	13.8	136	83	31.8	0	0	0	1	0	0	0	0	0	0	0	0	0	0	2529	148.73	85.78	22.56	4.73	1.09	9.84	6.3	53.3	3.97594	0	NA	NA	NA	NA	0
94606	1	57	3	0	2	5	12.5	64	510.714	2.01	13.4	105	78	25.7	1	1	1	1	0	0	0	0	0	0	0	0	0	0	2836	104.1	73.96	31.69	4.09	1.89	112	9.5	38.8	3.65842	65.5	NA	NA	NA	NA	2
94607	0	38	3	0	2	4.25	11.3	67	326.667	2.45	15	128	99	29.8	1	0	0	1	0	0	0	0	0	0	0	0	0	0	1139	77.26	64.4	9.79	4.53	1.53	552	5.1	27.4	3.31054	0	NA	NA	NA	NA	2
94609	1	70	5	2	2	5	21.9	69	398.647	1.85	13	127	67	24.8	0	0	1	1	0	0	0	0	0	0	0	0	0	0	1239	70.88	72.38	6.63	4.73	1.55	38.1	7	39.3	3.67122	0	NA	NA	NA	NA	0
94615	1	47	2	2	2	5	11.1	70	1039.21	13.66	13.8	109	65	37.4	1	0	1	1	1	1	1	NA	NA	1	NA	NA	NA	NA	1296	29.19	67.84	8.73	4.5	0.98	154	5.5	41.9	3.73529	0	28	NA	NA	NA	2
94616	0	62	1	2	2	0.7	13.4	63	380.926	0.87	15	151	97	37.9	0	0	0	1	0	0	0	0	0	0	0	0	0	0	1556	47.05	36.43	9.04	4.16	0.98	73.8	6.7	20.5	3.02042	0	NA	NA	NA	NA	0
94618	0	49	3	0	2	4.94	19.2	63	345.133	1.06	16.2	123	86	32.7	1	0	0	1	0	0	0	0	0	0	0	0	0	0	3227	112.33	194.23	12.07	4.45	1.09	460	5.4	30.4	3.41444	0	NA	NA	NA	NA	2
94619	0	61	4	1	2	4.04	22.6	77	165.13	1.89	14.5	181	102	26.6	0	0	0	0	0	0	0	0	0	0	0	0	0	0	758	14.32	15.68	3.57	5.84	1.68	117	5.8	30.8	3.42751	0	NA	NA	NA	NA	0
94623	1	48	3	0	2	5	14.3	71	620.743	0.86	13.6	125	73	23.9	0	0	0	0	0	1	1	1	NA	NA	NA	NA	NA	NA	2660	74.62	138.8	16.46	4.53	1.99	43.7	5.4	31.2	3.44042	0	14	NA	NA	NA	0
94624	0	38	5	2	2	4.62	25.6	73	491.846	1.64	16.9	115	75	25.7	0	0	0	0	0	0	0	0	0	0	0	0	0	0	1834	73.86	56.03	12.04	4.84	1.19	741	6	27.7	3.32143	0	NA	NA	NA	NA	0
94625	0	22	4	1	0	1.2	26.7	68	178.261	0.73	14.9	129	63	22.2	1	0	0	0	0	0	0	0	0	0	0	0	0	0	1262	38.03	36.47	3.29	4.99	1.34	394	5.6	21.7	3.07731	0	NA	NA	NA	NA	1
94627	0	59	2	2	2	1.72	8.2	79	1274.06	29.64	15.6	157	88	37.4	0	0	1	1	0	0	0	0	0	0	0	0	0	0	1591	54.91	46.07	33.46	4.47	1.06	81.4	7.5	71.7	4.27249	0	NA	NA	NA	NA	0
94631	1	21	4	1	1	2.37	6.3	73	338.154	6.88	13	101	65	25.9	0	0	0	0	0	0	0	0	0	0	0	0	0	0	2138	48.42	93.04	8.87	4.09	1.78	25.7	5.4	39.8	3.68387	0	NA	NA	NA	NA	0
94632	1	70	3	0	2	2.06	12.7	70	483.2	7.3	12.8	98	53	27.9	0	0	0	1	0	0	0	0	0	0	0	0	0	0	1115	65.69	38.28	7.26	4.73	1.42	241	5.9	28.7	3.3569	0	NA	NA	NA	NA	0
94633	1	68	3	0	2	5	13.8	68	606	0.56	14.2	111	71	25.7	1	0	0	0	0	0	0	0	0	0	0	0	0	0	3888	170.51	266.13	27.41	5.59	1.99	89.4	5.7	31.3	3.44362	0	NA	NA	NA	NA	2
94634	1	80	3	0	1	2.27	27.6	62	699.857	0.93	14.3	129	83	25.3	0	0	0	1	1	0	0	0	0	0	0	0	0	0	773	13.41	37.7	3.42	3.1	1.06	86.2	5.8	28.1	3.33577	0	NA	NA	NA	NA	0
94640	1	55	5	2	2	5	15.2	68	429.476	3.66	12.6	121	77	31.8	0	0	0	0	0	0	0	0	0	0	0	0	0	0	2588	66.14	66.67	19.54	4.73	1.11	16.2	5.4	44	3.78419	0	NA	NA	NA	NA	0
94642	1	62	3	0	1	2.04	15.6	65	786.5	1.45	15.9	121	71	36.1	1	0	1	1	0	0	0	0	0	0	0	0	0	0	1963	75.37	105.58	11.76	4.68	1.29	196	7.7	37.4	3.62167	0	NA	NA	NA	NA	1
94644	0	24	3	0	0	1.2	14.9	72	342.476	0.6	15.3	119	67	18.9	0	0	0	0	0	0	0	0	0	0	0	0	0	0	2538	95.53	95.98	11.59	3.7	1.01	147	4.7	29.5	3.38439	0	NA	NA	NA	NA	0
94647	1	38	5	2	2	3.47	17.7	78	412.696	0.38	13.2	95	65	22.8	0	0	0	0	0	0	0	0	0	0	0	0	0	0	1255	55.61	40.76	8.44	3.75	1.16	27.2	5	29.7	3.39115	0	NA	NA	NA	NA	0
94648	1	45	5	2	2	2.89	24.4	70	424.192	0.4	13.2	106	68	21.2	0	0	0	0	0	0	0	0	0	0	0	0	0	0	1911	70.81	74.58	11.89	5.72	1.27	141	5.3	21.6	3.07269	0	NA	NA	NA	NA	0
94649	0	67	3	0	1	2.47	17.9	66	428.719	3.97	14.9	114	55	34.5	1	0	0	0	0	0	0	0	0	0	0	0	0	0	3939	223.35	188.28	34.4	3.1	1.37	146	6	27	3.29584	0	NA	NA	NA	NA	2
94650	1	65	4	1	1	4.31	12.9	71	146.971	6.86	12.8	135	81	28.8	1	0	1	1	0	0	0	0	0	0	0	0	0	0	822	26.7	44.05	6.26	4.94	1.76	308	5.7	36.1	3.58629	0	NA	NA	NA	NA	2
94651	1	57	3	0	1	1.27	11.5	67	462	8.97	13.4	130	75	41	1	0	0	0	0	1	NA	NA	NA	NA	NA	NA	NA	NA	2305	120.86	71.8	27.87	4.86	0.91	557	5.8	47.6	3.86283	0	23	NA	NA	NA	2
94652	1	74	3	0	2	3.19	16.1	67	541.053	1.7	14.3	110	62	28	0	0	0	1	0	1	1	1	NA	NA	NA	NA	NA	NA	1966	61.05	93.49	20.45	5.4	2.69	88	5.4	26.1	3.26194	0	14	NA	NA	NA	0
94654	1	61	3	0	2	4.19	25.1	68	217	4.08	13.1	129	73	26.4	0	1	0	1	0	1	1	1	NA	NA	NA	NA	NA	NA	1411	65.7	61.76	7.69	4.42	1.5	392	5.1	37.1	3.61362	30.9	14	NA	NA	NA	0
94660	1	40	1	2	2	5	15.4	75	264.346	2.78	15.1	93	63	32.7	0	0	0	0	0	0	0	0	0	0	0	0	0	0	1061	45.18	50.71	4.27	6.83	2.04	44.2	5.1	24	3.17805	0	NA	NA	NA	NA	0
94663	1	30	5	2	2	5	17.7	68	612.722	0.49	13.9	110	69	23	0	1	0	0	0	0	0	0	0	0	0	0	0	0	2237	78.32	82.88	10.77	4.27	1.63	59.9	5.2	28.4	3.34639	39.7	NA	NA	NA	NA	0
94664	0	41	5	2	2	4.55	20.1	74	258.333	0.29	15.6	131	86	21.7	0	1	0	0	0	0	0	0	0	0	0	0	0	0	3550	185.49	120.38	15.7	7.34	1.58	302	5.7	36	3.58352	70.2	NA	NA	NA	NA	0
94666	1	38	4	1	2	1.14	19.3	72	488.613	0.93	11	121	55	31.5	0	0	0	0	0	0	0	0	0	0	0	0	0	0	1937	70.91	74.6	11.92	5.02	0.93	15.7	6	67.4	4.21065	0	NA	NA	NA	NA	0
94669	0	38	3	0	2	5	15.9	73	229.778	0.21	14.9	106	75	25	1	0	0	0	0	1	NA	NA	NA	NA	NA	NA	NA	NA	1998	70.4	96.06	10.78	4.84	1.32	457	5	26.8	3.2884	0	33	NA	NA	NA	2
94670	0	60	4	1	0	0.81	15.2	73	500.95	6.34	13.7	113	67	29.1	1	0	0	1	0	0	0	0	0	0	0	0	0	0	2040	48.71	68.34	22.62	3.75	0.85	213	6.2	27	3.29584	0	NA	NA	NA	NA	2
94672	1	29	3	0	2	5	10.2	70	581.921	2.39	13.7	117	74	35.7	0	0	0	1	0	0	0	0	0	0	0	0	0	0	1054	46.48	35.58	8.21	6.49	1.37	41.8	5.5	40.4	3.69883	0	NA	NA	NA	NA	0
94676	0	67	4	1	2	5	15	66	938.778	1.37	13.2	155	71	25.9	0	0	1	0	0	0	0	0	0	0	0	0	0	0	2641	61.97	128.19	6.77	3.44	1.29	30.5	7.7	42.8	3.75654	0	NA	NA	NA	NA	0
94677	1	25	3	0	1	1.91	9	73	433.917	7.48	13.5	107	71	35.3	0	0	0	0	0	0	0	0	0	0	0	0	0	0	1694	42.96	81.04	5.56	3.98	1.34	16	5.4	49.3	3.89792	0	NA	NA	NA	NA	0
94678	1	58	3	0	2	5	18.4	68	210.136	0.64	13.3	123	76	24.2	0	1	0	0	0	0	0	0	0	0	0	0	0	0	1816	82.32	80.22	9.16	5.4	2.28	69.9	5.4	34.6	3.54385	7.7	NA	NA	NA	NA	0
94679	0	63	1	2	2	4.31	19	70	713.556	0.46	15.7	113	76	31.2	1	1	1	1	0	0	0	0	0	0	0	0	0	0	2040	79.73	68.93	10.37	6.44	1.4	175	5.7	20.8	3.03495	67	NA	NA	NA	NA	2
94681	0	60	3	0	1	1.47	18.4	68	1125.54	5.42	14.7	130	48	43	0	0	0	0	0	0	0	0	0	0	0	0	0	0	744	33.22	31.17	3.73	4.84	0.93	193	5.4	25.8	3.25037	0	NA	NA	NA	NA	0
94684	1	38	3	0	1	1.02	10.2	79	1076.36	7.06	13.8	109	71	29.2	0	0	0	0	0	0	0	0	0	0	0	0	0	0	1670	43.25	80.32	5.25	4.78	1.29	26.6	6	41.9	3.73529	0	NA	NA	NA	NA	0
94685	1	47	4	1	2	2.02	3.6	77	462.52	4.2	8.8	123	83	38.5	1	0	0	1	0	0	0	0	0	0	0	0	0	0	3155	114.86	148.13	13.86	4.19	1.19	6.01	5.4	179	5.18739	0	NA	NA	NA	NA	1
94686	1	33	3	0	1	3.48	16.8	70	221.35	3.58	13.1	123	82	25.6	1	1	0	0	0	0	0	0	0	0	0	0	0	0	2513	89.86	90.53	12.11	5.84	1.37	77.6	5	23.8	3.16969	55.6	NA	NA	NA	NA	1
94687	1	35	5	2	2	0.58	10.2	79	617.842	0.37	13.2	115	83	22.2	0	0	0	0	0	0	0	0	0	0	0	0	0	0	1911	70.81	74.58	11.89	4.19	1.76	54.3	5.4	47.4	3.85862	0	NA	NA	NA	NA	0
94688	0	61	3	0	2	5	26	67	336.538	1.22	16.5	109	75	31.7	0	1	0	0	0	0	0	0	0	0	0	0	0	0	3122	117.2	154.07	16.31	4.76	1.27	210	5.3	23	3.13549	44.5	NA	NA	NA	NA	0
94689	0	22	2	2	2	0.41	19.2	76	390.391	0.62	14.8	110	82	30.9	0	0	0	0	0	0	0	0	0	0	0	0	0	0	2367	102.03	105.97	12.46	4.81	0.88	123	5	36.1	3.58629	0	NA	NA	NA	NA	0
94693	0	59	3	0	0	1.25	14.7	80	645.562	7.04	13.3	122	72	36.6	0	0	0	1	0	0	0	0	0	0	0	0	0	0	2809	120.94	137.52	17.76	5.69	2.74	22.8	5.3	31.4	3.44681	0	NA	NA	NA	NA	0
94695	1	56	3	0	1	3.4	11.5	67	904.583	0.69	14.1	119	73	17.9	1	0	0	0	0	0	0	0	0	0	0	0	0	0	2440	94.49	125.72	14.85	7.16	1.37	97.8	5.7	25.8	3.25037	0	NA	NA	NA	NA	1
94696	1	43	3	0	2	2.06	27.6	73	448.5	0.48	13.5	96	65	22.2	0	0	0	1	0	0	0	0	0	0	0	0	0	0	2598	100.6	100.79	13.76	4.01	1.24	52.6	5.2	22.3	3.10459	0	NA	NA	NA	NA	0
94697	1	23	3	0	2	3.34	21.3	79	620.038	0.29	13.2	116	66	18.4	0	0	0	0	0	0	0	0	0	0	0	0	0	0	1873	113.04	95.66	8.86	3.9	1.55	62	5.4	21.2	3.054	0	NA	NA	NA	NA	0
94704	1	80	4	1	0	1.27	10.7	72	119	5.16	11.9	157	65	24.6	1	0	1	1	0	0	0	0	0	0	0	0	0	0	767	25.84	33.61	3.33	3.88	1.03	76	7.1	33.7	3.5175	0	NA	NA	NA	NA	2
94705	1	62	5	2	2	5	11.3	69	312.577	1.62	11.8	140	71	36.5	0	0	0	0	0	0	0	0	0	0	0	0	0	0	1364	37.21	62.34	5.6	5.53	2.3	152	5.8	35	3.55535	0	NA	NA	NA	NA	0
94706	1	43	5	2	2	3.73	4.3	73	385.92	0.68	9.4	135	81	27.1	0	0	0	0	0	0	0	0	0	0	0	0	0	0	1936	59.62	49.17	18.91	4.63	1.66	5.01	5.5	136	4.91265	0	NA	NA	NA	NA	0
94708	0	41	3	0	2	5	18.3	70	500.824	2.64	14.9	116	86	30.9	0	0	0	0	0	0	0	0	0	0	0	0	0	0	2479	145.37	153.19	16.49	5.46	1.19	145	5.7	29.4	3.38099	0	NA	NA	NA	NA	0
94710	0	35	4	1	0	1.44	23.5	68	343.2	1.78	17	131	76	25.7	1	0	0	0	0	0	0	0	0	0	0	0	0	0	852	30.74	35.3	8.3	3.52	1.16	114	6	26	3.2581	0	NA	NA	NA	NA	1
94711	1	64	3	0	2	2.17	16.7	71	496.125	7.35	16.1	151	63	41.4	1	0	1	1	1	0	0	0	0	0	0	0	0	0	1433	48.45	50.92	10.06	5.61	1.03	199	6.7	41.5	3.72569	0	NA	NA	NA	NA	2
94716	1	76	3	0	2	1.73	23.1	72	291.706	1.59	14.4	123	71	30.5	0	0	0	0	0	0	0	0	0	0	0	0	0	0	1918	129.6	92.49	9.35	6.34	1.89	140	5.2	47.3	3.85651	0	NA	NA	NA	NA	0
94719	1	56	1	2	0	2.27	14.3	69	542.857	3.62	13.5	112	73	31.8	0	0	0	0	0	1	1	1	NA	NA	NA	NA	NA	NA	1596	58.55	70.51	13.4	4.78	1.22	68	5.5	33.2	3.50255	0	14	NA	NA	NA	0
94720	0	22	4	1	2	0.61	15.4	67	115.2	0.51	15.3	128	59	33.9	0	1	0	0	1	0	0	0	0	0	0	0	0	0	3709	95.74	125.2	18.99	3.21	0.98	277	4.7	36.2	3.58906	16.7	NA	NA	NA	NA	0
94721	0	30	2	2	1	1.7	14.9	69	361.565	2.39	14.9	139	76	44.6	0	0	0	0	0	0	0	0	0	0	0	0	0	0	3588	181.07	165.74	24.71	5.4	0.75	157	5.3	32.3	3.47507	0	NA	NA	NA	NA	0
94724	1	80	3	0	1	0.99	9.9	73	1081.67	5.75	12.6	136	69	28.7	0	0	1	1	0	1	NA	NA	NA	NA	NA	NA	NA	NA	1337	61.07	64.44	9.29	4.06	1.01	125	7.6	62	4.12713	0	16	NA	NA	NA	0
94726	1	46	3	0	2	5	17.7	66	275.939	2.67	13.2	104	64	29.4	0	0	1	1	0	0	0	0	0	0	0	0	0	0	2506	81.57	92.27	44.04	5.12	1.55	40.9	8.1	27.4	3.31054	0	NA	NA	NA	NA	0
94729	0	37	4	1	0	2.31	13.3	78	702	8.94	13.4	110	82	33.3	1	0	0	1	0	0	0	0	0	0	0	0	0	0	1313	27.89	49.41	4.86	5.48	1.32	214	5.8	73.9	4.30271	0	NA	NA	NA	NA	1
94731	1	44	4	1	2	2.03	4.5	82	186.667	0.63	9	137	72	26.6	0	0	0	0	0	0	0	0	0	0	0	0	0	0	2018	96.32	115.21	6.56	3.75	1.09	13.4	5	227	5.42495	0	NA	NA	NA	NA	0
94732	1	45	4	1	2	1.71	14.3	71	651.304	2.01	13.2	121	82	27.3	0	0	0	1	0	0	0	0	0	0	0	0	0	0	1787	70.99	81.48	11.1	4.73	1.33	49.3	12.2	45.5	3.81771	0	NA	NA	NA	NA	0
94735	1	45	2	2	1	0.82	13.3	70	413.4	8.02	13.7	135	101	28.7	0	0	1	1	1	0	0	0	0	0	0	0	0	0	1278	53.81	63.17	5.03	4.86	1.47	31.7	5.8	42.1	3.74005	0	NA	NA	NA	NA	0
94736	0	51	5	2	2	3.88	18.4	73	1104.55	2.3	16.2	118	75	25.6	0	0	1	0	0	0	0	0	0	0	0	0	0	0	1012	64.66	58.06	6.45	5.28	1.06	129	7.2	34	3.52636	0	NA	NA	NA	NA	0
94739	0	57	3	0	2	1.48	14.3	71	428.48	2.01	16.1	137	80	27.2	1	1	0	0	0	0	0	0	0	0	0	0	0	0	2055	60.87	105.89	13.37	6.21	1.32	299	5.3	21.2	3.054	37.7	NA	NA	NA	NA	1
94740	1	46	5	2	2	2.49	20.1	77	703.862	0.52	14.7	107	69	21.9	1	0	0	0	0	0	0	0	0	0	0	0	0	0	2458	95.74	84.33	12.11	5.48	1.06	64.4	5.6	30.8	3.42751	0	NA	NA	NA	NA	2
94744	0	43	4	1	2	1.14	17.2	74	126.316	9.25	14.6	122	63	27.2	0	1	0	0	0	0	0	0	0	0	0	0	0	0	745	38.98	20.62	15.67	5.87	1.06	226	7.7	45.5	3.81771	1.1	NA	NA	NA	NA	0
94748	1	51	4	1	2	0	10.7	66	1204.36	2.5	12.9	147	76	24.5	0	0	0	0	0	0	0	0	0	0	0	0	0	0	1200	38.69	52.56	6.93	8.02	1.47	34.2	6	53.3	3.97594	0	NA	NA	NA	NA	0
94750	0	80	3	0	0	1.1	8.2	71	484.5	1.72	13.3	123	67	34.4	1	0	1	1	1	0	0	0	0	0	0	0	0	0	1041	59.72	52	5.59	4.63	0.93	23.4	9	104	4.64439	0	NA	NA	NA	NA	2
94752	0	73	3	0	1	2.99	16.1	70	458.889	1.7	14.7	139	67	25.9	0	0	0	1	0	0	0	0	0	0	0	0	0	0	2456	105.76	121.71	27.4	3.36	1.45	240	5.6	29.6	3.38777	0	NA	NA	NA	NA	0
94753	1	74	5	2	2	5	12.4	72	300.632	0.96	12.9	132	72	29	0	0	1	1	0	1	1	1	NA	NA	NA	NA	NA	NA	1794	70.48	51.14	10.54	4.6	1.58	480	6.5	30.7	3.42426	0	14	NA	NA	NA	0
94754	1	65	3	0	0	5	16.8	77	651	8.51	14.4	158	87	35	0	0	0	1	0	0	0	0	0	0	0	0	0	0	2172	91.63	79.23	12.24	8.04	1.14	63.6	6.6	36.1	3.58629	0	NA	NA	NA	NA	0
94755	1	74	2	2	0	1.79	12.9	72	373.421	1.86	13.3	150	57	33.5	0	0	1	1	1	0	0	0	0	0	0	0	0	0	1392	76.61	64.82	12.53	3.26	1.24	75.1	8.2	55.1	4.00915	0	NA	NA	NA	NA	0
94760	1	74	4	1	2	0.91	19.3	67	242.727	0.35	13.8	162	97	19.7	1	0	0	1	1	0	0	0	0	0	0	0	0	0	1944	68.86	88.61	14.04	5.72	2.12	197	5.6	39.6	3.67883	0	NA	NA	NA	NA	2
94761	0	24	5	2	2	2.41	13.6	75	715.429	0.76	15.1	123	73	27.6	1	0	0	0	0	0	0	0	0	0	0	0	0	0	2262	81.15	120.55	10.83	5.2	1.06	379	5.8	27.3	3.30689	0	NA	NA	NA	NA	1
94763	0	43	4	1	1	4.85	14.7	75	319	1.36	15.3	123	69	35.7	1	0	1	1	0	0	0	0	0	0	0	0	0	0	1309	63.95	58.8	8.67	4.91	1.45	201	5.2	25.8	3.25037	0	NA	NA	NA	NA	2
94764	1	43	4	1	2	3.4	15.9	67	528.393	2.85	12.4	121	72	41.5	1	1	0	0	0	0	0	0	0	0	0	0	0	0	1919	60.13	65.83	10.78	5.48	0.72	47.1	5.9	31.9	3.46261	14.4	NA	NA	NA	NA	1
94765	0	55	3	0	2	0.8	24.2	73	837.857	2.95	14.9	119	73	26.2	1	0	0	1	1	0	0	0	0	0	0	0	0	0	891	38.62	40.99	6.08	4.01	1.4	696	5.4	28.7	3.3569	0	NA	NA	NA	NA	1
94766	0	42	4	1	2	5	21.3	73	164.353	4.48	14.7	107	68	33.1	0	1	0	0	0	0	0	0	0	0	0	0	0	0	2100	96.11	84.19	9.03	4.73	1.24	88.7	5.8	33.2	3.50255	23	NA	NA	NA	NA	0
94767	0	69	5	2	1	1.29	14.9	76	330.312	1.76	14.7	121	71	48.4	1	0	0	1	1	0	0	0	0	0	0	0	0	0	1911	70.81	74.58	11.89	4.09	1.5	88.7	5.7	62.4	4.13357	0	NA	NA	NA	NA	2
94768	0	80	3	0	2	3.34	13.3	68	1139.2	2.86	17.1	127	79	34.7	1	0	0	1	0	1	NA	NA	NA	NA	NA	NA	NA	NA	1735	83.77	59.4	16.14	4.53	1.37	223	5.5	34	3.52636	0	24	33	NA	NA	2
94771	1	42	3	0	1	3.23	18.6	70	575.722	8.93	14.8	120	74	25.5	1	1	0	0	0	0	0	0	0	0	0	0	0	0	1712	44.13	53.02	8.04	5.25	2.04	53.8	5.3	20.7	3.03013	33.5	NA	NA	NA	NA	1
94773	0	32	1	2	2	5	14	74	264.783	2.4	16.1	125	86	30.8	0	1	0	1	0	0	0	0	0	0	0	0	0	0	2632	119.51	100.49	19.61	4.99	1.32	119	5.1	37.2	3.61631	10.7	NA	NA	NA	NA	0
94775	1	26	4	1	2	1.22	3.9	68	473.684	0.25	11.6	101	64	32	0	0	0	0	0	0	0	0	0	0	0	0	0	0	1593	37.9	76.41	5.37	4.14	1.24	7.22	5	65.4	4.18052	0	NA	NA	NA	NA	0
94776	0	72	2	2	2	1.08	12.9	67	602.25	8.46	14.1	122	72	25.4	1	0	1	1	0	1	NA	NA	NA	NA	NA	NA	NA	NA	945	51.66	22.13	9.19	4.4	0.7	420	6.9	39.5	3.6763	0	23	NA	NA	NA	2
94777	1	80	3	0	2	2.94	9.1	66	1200	3.96	11.9	177	59	22.7	0	0	0	1	0	0	0	0	0	0	0	0	0	0	1251	44.81	58.33	7.69	6.47	1.81	49.6	5.7	57.8	4.05699	0	NA	NA	NA	NA	0
94779	0	80	3	0	2	2.84	12	71	366	2.1	16.3	128	64	29.9	1	0	1	1	1	0	0	0	0	0	0	0	0	0	1767	93.58	83.4	13.87	3.59	0.93	336	7.4	46.1	3.83081	0	NA	NA	NA	NA	2
94780	0	74	1	2	2	5	18.4	75	166.625	0.31	14.7	125	74	30.1	1	0	0	1	0	0	0	0	0	0	0	0	0	0	1694	67.95	65.88	12.68	4.55	1.32	488	5.7	36.7	3.60278	0	NA	NA	NA	NA	2
94785	0	55	5	2	2	3.08	22.2	66	332.385	0.83	15.8	112	72	26.6	0	0	0	0	0	0	0	0	0	0	0	0	0	0	1911	70.81	74.58	11.89	2.87	1.14	227	5.7	34.7	3.54674	0	NA	NA	NA	NA	0
94786	1	24	3	0	2	2.79	7.5	77	504.333	5.71	13.3	119	71	32	0	0	0	0	0	0	0	0	0	0	0	0	0	0	1460	65.13	66.25	9.96	5.56	1.32	47.1	5.4	52	3.95124	0	NA	NA	NA	NA	0
94788	1	53	5	2	2	5	9.9	69	390.235	1.66	13.4	93	64	21.5	0	0	0	0	0	0	0	0	0	0	0	0	0	0	856	37.37	37.04	6.29	5.02	1.86	53	5.6	29.7	3.39115	0	NA	NA	NA	NA	0
94792	0	66	5	2	2	2.94	17.6	74	743.6	1.11	12.9	215	82	24.6	0	0	1	1	0	0	0	0	0	0	0	0	0	0	1911	70.81	74.58	11.89	4.45	1.22	916	5.1	26.7	3.28466	0	NA	NA	NA	NA	0
94793	0	40	1	2	2	1.91	27.6	72	319.222	0.58	15.8	110	77	32.9	0	0	0	0	0	0	0	0	0	0	0	0	0	0	4486	158.84	169.48	25.56	5.22	1.09	169	5.1	40.1	3.69138	0	NA	NA	NA	NA	0
94795	1	27	1	2	2	5	23.6	70	685.565	0.49	12.7	87	67	21	0	0	0	0	0	0	0	0	0	0	0	0	0	0	1148	48.38	54.24	5.72	4.6	2.09	13.5	5.3	33	3.49651	0	NA	NA	NA	NA	0
94797	1	66	5	2	0	1.16	15.8	74	288.75	0.25	12.4	113	68	25.5	0	0	1	1	0	0	0	0	0	0	0	0	0	0	1992	109.46	60.81	23.64	4.94	1.81	195	5.9	29.9	3.39786	0	NA	NA	NA	NA	0
94801	0	45	4	1	2	4.32	15.2	72	486	2.11	14.3	106	71	30.9	0	0	0	1	0	0	0	0	0	0	0	0	0	0	3213	240.24	86.41	20.2	3.7	0.93	244	5.1	38.5	3.65066	0	NA	NA	NA	NA	0
94802	0	22	2	2	1	3.29	16.1	70	1050.33	0.91	15.8	107	56	31.2	0	0	0	0	0	0	0	0	0	0	0	0	0	0	1911	70.81	74.58	11.89	5.04	1.71	128	5.5	17.6	2.8679	0	NA	NA	NA	NA	0
94805	0	62	5	2	1	0.46	36.2	67	211.75	0.73	12.6	122	72	41.7	0	0	1	1	1	0	0	0	0	0	0	0	0	0	1911	70.81	74.58	11.89	2.22	0.91	179	4.1	58.8	4.07414	0	NA	NA	NA	NA	0
94806	0	55	2	2	0	1.82	21.1	73	686.333	2.3	15.7	122	72	29.4	1	0	0	0	0	0	0	0	0	0	0	0	0	0	1911	70.81	74.58	11.89	6.08	1.06	94.2	5.3	36.3	3.59182	0	NA	NA	NA	NA	2
94808	1	41	4	1	2	1.46	8.6	73	177.739	9.26	11.8	122	72	32.4	0	0	0	0	0	0	0	0	0	0	0	0	0	0	1911	70.81	74.58	11.89	5.38	1.14	84.4	6.1	38.9	3.66099	0	NA	NA	NA	NA	0
94809	1	79	1	2	0	1.78	18.6	65	299	1.21	13.3	99	49	28.7	0	0	0	0	0	0	0	0	0	0	0	0	0	0	1242	59.05	37.18	10.39	4.09	1.29	208	5.6	18.4	2.91235	0	NA	NA	NA	NA	0
94811	0	68	4	1	0	0.57	13.1	72	294.15	6.34	14.2	122	72	29	0	1	0	0	0	0	0	0	0	0	0	0	0	0	2837	98.43	151.74	15.66	4.97	1.03	161	5.9	44.3	3.79098	33.5	NA	NA	NA	NA	0
94812	0	46	5	2	2	4.58	24.5	66	234	1.14	15.9	122	87	27.6	1	0	0	0	0	0	0	0	0	0	0	0	0	0	1816	86.77	72.2	14.34	5.87	1.16	247	5.7	29.6	3.38777	0	NA	NA	NA	NA	1
94813	1	62	5	2	2	2.39	16.7	78	223.875	0.46	13.5	132	60	26.7	0	0	0	1	0	0	0	0	0	0	0	0	0	0	1470	32.65	25.87	6.18	6.44	1.42	222	5.3	30.1	3.40453	0	NA	NA	NA	NA	0
94819	1	32	1	2	0	1.14	16.7	74	254	6.64	13.6	97	56	24	0	0	0	0	0	0	0	0	0	0	0	0	0	0	2423	105.63	89.25	17.96	4.34	1.97	34.8	5.1	38.1	3.64021	0	NA	NA	NA	NA	0
94829	1	80	3	0	2	4.25	13.6	68	368.407	4.91	13.9	165	69	30.2	0	0	0	1	0	0	0	0	0	0	0	0	0	0	1423	41.56	66.49	8.13	3.36	1.16	81.1	6.6	25.6	3.24259	0	NA	NA	NA	NA	0
94831	1	64	3	0	0	2.65	22.4	70	295.826	0.84	16	168	95	20.3	1	0	0	0	0	0	0	0	0	0	0	0	0	0	2114	71.53	78.81	13.36	5.9	1.4	75.8	5.1	29.1	3.37074	0	NA	NA	NA	NA	1
94832	1	71	3	0	2	4.93	10.7	68	375.889	3.58	13.9	125	71	29	0	0	0	1	0	0	0	0	0	0	0	0	0	0	1312	94.9	68.54	7.45	4.4	1.73	120	5.6	44.6	3.79773	0	NA	NA	NA	NA	0
94834	1	62	3	0	2	5	15.4	74	277.333	0.4	12.8	108	20	36.1	0	0	1	1	0	0	0	0	0	0	0	0	0	0	2607	85.45	149.11	13.49	3.96	1.71	123	6	29.6	3.38777	0	NA	NA	NA	NA	0
94835	1	59	3	0	1	0.74	9.1	70	1063.12	3.9	14.7	131	77	32.2	1	0	0	0	0	0	0	0	0	0	0	0	0	0	911	12.18	26.31	3.12	5.61	1.5	64.5	5.9	28.2	3.33932	0	NA	NA	NA	NA	2
94844	0	36	3	0	2	5	22.4	71	249.429	0.61	15.2	104	66	27.8	0	0	0	0	0	0	0	0	0	0	0	0	0	0	1911	70.81	74.58	11.89	4.86	1.22	439	5	25.7	3.24649	0	NA	NA	NA	NA	0
94847	1	80	4	1	1	1.17	13.6	69	585.143	6.22	9.6	178	68	42	1	0	1	1	1	1	NA	NA	NA	NA	NA	NA	NA	NA	1204	71.66	54.92	7.28	4.99	2.51	148	6.6	41.5	3.72569	0	16	NA	NA	NA	2
94848	1	32	2	2	2	2.65	10.4	69	484.087	4.26	13.8	103	57	29	0	0	0	0	0	0	0	0	0	0	0	0	0	0	958	77.74	18.54	6.56	3.52	1.06	36.4	5	21.7	3.07731	0	NA	NA	NA	NA	0
94850	0	46	3	0	1	1.75	12.5	86	256.167	11.62	13.4	95	63	21.2	1	1	0	0	0	0	0	0	0	0	0	0	0	0	1476	58.26	38.84	7.97	4.55	1.4	1120	5.4	21.4	3.06339	67	NA	NA	NA	NA	1
94852	0	33	1	2	0	0.49	10.7	72	549.667	4.5	14.2	105	70	35.8	0	0	0	0	0	0	0	0	0	0	0	0	0	0	2372	44.22	65.02	11.15	4.76	0.96	46.4	5.2	38.5	3.65066	0	NA	NA	NA	NA	0
94857	1	35	2	2	2	1.57	20.4	73	541.13	4.18	15.2	158	107	46.8	1	0	0	0	0	0	0	0	0	0	0	0	0	0	1911	70.81	74.58	11.89	6.59	1.19	25.1	5.1	35.9	3.58074	0	NA	NA	NA	NA	1
94858	1	44	3	0	1	0.78	21.3	69	306	2.19	14.3	119	75	38.8	1	0	0	0	1	0	0	0	0	0	0	0	0	0	1559	55.8	79.56	11.66	5.72	1.97	311	5.5	24.7	3.2068	0	NA	NA	NA	NA	2
94860	1	33	4	1	2	1.26	8.8	73	441.194	4.48	11.7	127	66	37.2	0	0	0	0	0	0	0	0	0	0	0	0	0	0	2487	76.41	128.66	23.84	4.63	1.55	18.6	5	91.3	4.51415	0	NA	NA	NA	NA	0
94861	1	56	4	1	0	1.79	14.1	70	292.5	11.8	12.8	148	77	37.6	1	0	0	0	0	0	0	0	0	0	0	0	0	0	1423	42.58	46.13	4	4.55	1.4	139	6	26.2	3.26576	0	NA	NA	NA	NA	1
94862	1	53	5	2	2	5	12.2	73	443.52	0.51	13.4	133	95	19.6	0	0	0	0	0	0	0	0	0	0	0	0	0	0	991	51.54	37.33	9.83	6.23	2.15	177	5.1	38.4	3.64806	0	NA	NA	NA	NA	0
94863	0	51	2	2	2	0.83	6.8	77	715.4	2.56	10.1	133	67	32.9	1	0	1	1	0	0	0	0	0	0	0	0	0	0	1944	58.14	53.28	6.13	4.78	1.01	7.96	7.3	61.4	4.11741	0	NA	NA	NA	NA	2
94867	0	55	3	0	1	5	7.2	72	1079.23	1.61	14.6	117	69	31.9	0	1	0	0	0	0	0	0	0	0	0	0	0	0	3910	131.59	174.24	16.45	5.35	1.34	192	5.6	40.2	3.69387	49.5	NA	NA	NA	NA	0
94868	0	59	2	2	2	4.31	21.5	73	411.692	4.59	14.5	181	87	36.9	0	0	0	1	0	1	NA	NA	NA	NA	NA	1	1	NA	3681	150.69	132.96	16.41	4.97	1.11	158	5.4	31.6	3.45316	0	30	NA	NA	NA	0
94872	0	80	3	0	0	1.82	15.8	70	554.3	1.79	13.8	128	70	22.7	1	0	1	0	0	0	0	0	0	0	0	0	0	0	1369	54.31	68.81	23.1	4.6	1.27	105	6.1	25.8	3.25037	0	NA	NA	NA	NA	2
94877	0	71	1	2	0	0.96	20.8	70	301.343	4.73	16.1	134	62	35.9	1	0	0	1	1	0	0	0	0	0	0	0	0	0	1457	52.79	52.85	10.54	4.78	1.11	696	6.8	17.3	2.85071	0	NA	NA	NA	NA	2
94878	1	37	4	1	1	0.74	9.9	76	651.129	13.9	13	111	62	32.5	0	0	0	0	0	0	0	0	0	0	0	0	0	0	1711	79.57	79.46	24.07	4.16	1.63	30.6	5.5	36.3	3.59182	0	NA	NA	NA	NA	0
94879	1	48	5	2	2	4.08	14.1	67	207.778	0.41	13.7	116	74	32.3	1	0	0	0	0	0	0	0	0	0	0	0	0	0	1993	62.32	95.26	8.03	4.55	1.37	28.4	5.4	41.4	3.72328	0	NA	NA	NA	NA	2
94882	1	55	5	2	1	1.1	15.8	81	256	0.48	13.4	121	75	24.2	0	0	1	0	0	0	0	0	0	0	0	0	0	0	1589	54.55	69.89	7.85	4.27	1.99	57.9	8.6	54.4	3.99636	0	NA	NA	NA	NA	0
94883	0	59	4	1	1	3.92	16.8	71	240	1.14	11.9	134	66	24.6	1	0	0	1	0	0	0	0	0	0	0	0	0	0	2258	60.99	97.88	11.77	3.8	1.16	517	5.5	41.8	3.7329	0	NA	NA	NA	NA	2
94885	0	64	4	1	2	2.64	15.4	65	653.333	4.55	15.9	110	79	36.7	1	0	1	1	0	0	0	0	0	0	0	0	0	0	1673	106.55	85.27	11.16	3.85	0.83	348	5.4	86.5	4.46014	0	NA	NA	NA	NA	2
94889	1	41	1	2	0	2.72	9.3	66	768.091	6.09	13	127	83	37.3	0	0	0	0	0	0	0	0	0	0	0	0	0	0	2864	135.98	129.38	25.84	4.16	1.4	33.2	5.4	30.1	3.40453	0	NA	NA	NA	NA	0
94890	0	57	3	0	0	1.22	12.4	71	362.118	1.04	15.9	139	74	25.2	1	1	0	0	0	0	0	0	0	0	0	0	0	0	2034	61.43	101.48	14.37	5.66	0.91	291	5.6	47.8	3.86703	21	NA	NA	NA	NA	2
94891	1	40	4	1	2	3.32	6.3	75	477	11.6	13.1	125	69	27.2	0	0	0	1	0	0	0	0	0	0	0	0	0	0	2310	67.3	99.36	14.07	5.69	1.5	107	5.5	62.1	4.12875	0	NA	NA	NA	NA	0
94892	0	61	3	0	2	1.04	17.4	79	640.588	0.98	13.9	94	58	19.2	1	1	0	0	1	0	0	0	0	0	0	0	0	0	3301	141.35	107.86	15.03	4.24	1.47	295	5.3	35.8	3.57795	74.8	NA	NA	NA	NA	1
94893	1	48	5	2	2	3.92	15.2	83	597.484	1.03	13.9	122	81	32.4	0	0	0	0	0	0	0	0	0	0	0	0	0	0	1911	70.81	74.58	11.89	5.95	1.53	131	5.3	47.4	3.85862	0	NA	NA	NA	NA	0
94894	0	50	3	0	2	5	13.1	72	632.667	5.86	16	118	79	38.5	0	0	0	0	0	0	0	0	0	0	0	0	0	0	3579	109.46	147.62	23.94	3.8	1.45	295	5.1	33.3	3.50556	0	NA	NA	NA	NA	0
94896	1	50	4	1	0	0.6	7.3	67	508.2	9	11.7	111	67	34.2	0	0	0	0	0	0	0	0	0	0	0	0	0	0	890	36.19	30.1	4.8	4.34	1.47	14.8	5.5	80	4.38203	0	NA	NA	NA	NA	0
94898	1	74	3	0	1	2.48	9	65	460.862	7.41	14.4	152	67	40.6	0	0	1	1	0	1	1	1	NA	NA	1	NA	NA	NA	1447	70.97	68.92	6.13	5.3	1.11	170	6.8	35.6	3.57235	0	14	19	38	NA	0
94899	1	32	4	1	1	1.74	13.6	75	437.182	2.37	13.2	113	57	31.4	0	0	0	0	0	0	0	0	0	0	0	0	0	0	1064	27.52	33.9	5.23	3.7	1.47	87.2	5.2	41.5	3.72569	0	NA	NA	NA	NA	0
94902	1	67	5	2	0	4.07	26.7	74	510.286	1.15	13.9	122	72	21.7	0	0	0	0	0	0	0	0	0	0	0	0	0	0	1037	20.96	26.96	8.64	3.54	1.09	350	6.2	19.8	2.98568	0	NA	NA	NA	NA	0
94906	0	46	3	0	1	3.23	13.8	75	558.25	2.25	14.7	137	91	27.7	1	1	0	0	0	0	0	0	0	0	0	0	0	0	2568	102.93	111.21	13.3	7.24	0.98	121	5.3	34.7	3.54674	22.3	NA	NA	NA	NA	2
94907	1	80	3	0	2	5	3.8	67	291.5	12.1	12.2	144	59	32.5	0	0	1	1	1	1	1	1	NA	NA	NA	NA	NA	NA	821	26.07	28.06	9.69	4.58	1.24	205	8.4	68.7	4.22975	0	14	NA	NA	NA	0
94908	1	56	4	1	2	2.49	12.9	75	309.774	4.75	11.7	155	80	38.4	0	0	0	1	0	0	0	0	0	0	0	0	0	0	1182	30.55	36.32	8.04	6.85	1.01	390	6.6	29.6	3.38777	0	NA	NA	NA	NA	0
94916	1	26	4	1	1	0.64	12.7	67	399.185	11.77	12.5	106	58	33.1	0	1	0	1	0	0	0	0	0	0	0	0	0	0	1528	49.63	38.71	4.44	3.9	1.27	65.6	5.2	23.6	3.16125	28.7	NA	NA	NA	NA	0
94918	0	71	2	2	1	0.66	26	72	290	1.03	16.2	127	74	33.4	1	1	1	0	0	0	0	0	0	0	0	0	0	0	2814	79.43	92.15	10.07	5.17	2.02	292	5.9	32.6	3.48431	110.9	NA	NA	NA	NA	2
94920	1	58	4	1	2	3.69	9.7	71	387	8.34	13	141	74	37.8	1	0	0	1	0	1	1	1	NA	NA	NA	NA	NA	NA	2546	123.2	83.77	21.63	6.62	1.29	84.9	6.3	54.2	3.99268	0	14	NA	NA	NA	2
94921	1	61	5	2	2	4.72	20.2	73	175.724	1.55	13.7	149	80	27.9	0	0	0	1	0	0	0	0	0	0	0	0	0	0	2233	86.66	109.32	14.8	4.29	1.34	44.6	5.9	30.9	3.43076	0	NA	NA	NA	NA	0
94922	0	66	4	1	2	2.07	21.3	69	135.964	0.37	14.1	131	68	23.2	1	1	0	0	0	0	0	0	0	0	0	0	0	0	2528	88.53	92.58	17.48	5.77	1.58	297	6	27	3.29584	18.8	NA	NA	NA	NA	2
94924	1	29	3	0	2	1.2	6.6	71	1155.9	5.27	14.2	122	72	31.7	1	0	0	1	0	0	0	0	0	0	0	0	0	0	1911	70.81	74.58	11.89	5.3	1.06	28.1	5.3	48	3.8712	0	NA	NA	NA	NA	1
94926	0	37	3	0	1	0.73	13.3	67	294.5	1.17	14.8	106	69	21.8	1	1	0	0	0	1	NA	NA	NA	NA	NA	NA	NA	NA	2652	73.06	130.15	5.97	3.93	1.06	102	5.4	27	3.29584	22.3	12	NA	NA	NA	1
94929	0	78	3	0	2	5	21.5	64	235.059	1.1	15.9	125	68	23.3	1	0	0	1	0	1	NA	NA	NA	NA	NA	NA	NA	NA	2315	95.21	158.25	13.66	4.37	1.37	76.8	5.3	43.4	3.77046	0	32	NA	NA	NA	2
94931	1	63	3	0	1	1.02	14.3	71	492	2.01	15.3	151	95	32.5	1	0	0	0	0	0	0	0	0	0	0	0	0	0	1738	46.43	86.7	9.36	5.74	1.24	123	5.1	52.6	3.96272	0	NA	NA	NA	NA	2
94933	1	54	1	2	1	0.41	9.9	70	446.648	10.13	14.7	111	70	40.8	0	0	0	0	0	0	0	0	0	0	0	0	0	0	1327	38.38	49.21	11.61	5.2	1.71	108	7.2	31.2	3.44042	0	NA	NA	NA	NA	0
94935	1	41	5	2	0	2.29	14.3	68	450.76	1.95	14	107	67	28.8	1	0	0	0	0	1	1	NA	1	NA	NA	NA	NA	NA	2067	76.63	94.45	11.42	5.15	0.96	116	5.4	26.4	3.27336	0	15	NA	NA	NA	2
94936	1	25	4	1	2	1.02	12.5	70	453	2.18	12.5	109	61	35.5	0	0	0	0	0	0	0	0	0	0	0	0	0	0	1477	55.71	35.77	10.6	5.15	1.55	65.7	5.5	47.2	3.85439	0	NA	NA	NA	NA	0
94938	0	61	4	1	1	2.31	11.1	79	967.353	5.18	14.5	154	96	31.8	1	0	0	1	0	0	0	0	0	0	0	0	0	0	2797	79.6	157.92	15.4	4.37	1.06	86.7	5.2	50.3	3.91801	0	NA	NA	NA	NA	2
94939	0	31	5	2	2	1.69	28.8	72	1020	0.87	15.3	115	66	20.8	1	1	0	0	0	0	0	0	0	0	0	0	0	0	2846	125.48	154.63	11.66	4.99	1.29	104	4.7	30.6	3.421	56.1	NA	NA	NA	NA	1
94940	1	80	5	2	0	1.1	17.9	67	747.6	1.15	12	174	110	33.7	1	0	0	1	0	1	NA	NA	NA	NA	NA	NA	NA	NA	1158	73.76	50.76	8.47	4.65	1.73	62.2	5.7	26.3	3.26957	0	33	NA	NA	NA	2
94941	0	28	4	1	2	2.83	16.3	71	330.357	2.92	13.9	122	67	33.5	0	0	0	0	0	0	0	0	0	0	0	0	0	0	1806	47.71	69.45	7.38	4.55	1.58	131	5.7	50.7	3.92593	0	NA	NA	NA	NA	0
94945	0	29	1	2	2	0.15	14.7	83	1080.64	7.96	15	128	96	38.7	0	0	0	0	0	0	0	0	0	0	0	0	0	0	3009	139.91	142.81	15.59	4.99	0.98	28.2	5.7	42	3.73767	0	NA	NA	NA	NA	0
94946	0	23	3	0	2	1	20.2	68	333.273	6.57	16.1	125	70	35.7	1	1	0	0	0	0	0	0	0	0	0	0	0	0	3681	100.82	186.51	17.7	4.45	0.85	359	10.2	31.4	3.44681	26.8	NA	NA	NA	NA	1
94950	1	80	3	0	2	2.11	11.8	61	470.4	0.63	13.1	137	75	21.8	0	0	0	0	0	0	0	0	0	0	0	0	0	0	886	22.25	35.13	6.26	5.17	1.97	194	5.5	39.3	3.67122	0	NA	NA	NA	NA	0
94952	1	63	3	0	2	5	10.4	68	1089	2.53	11.9	127	57	38.2	0	0	0	1	0	0	0	0	0	0	0	0	0	0	1990	65.09	113.67	11.71	4.11	2.4	101	6	49	3.89182	0	NA	NA	NA	NA	0
94953	1	59	3	0	2	0	8.6	68	772.414	33.95	11.9	124	81	52	1	0	0	0	0	1	1	NA	NA	NA	1	NA	NA	NA	1076	18.77	28.3	9.71	7.16	1.47	83.2	5.7	47.9	3.86912	0	38	NA	NA	NA	2
94954	0	34	4	1	2	4.56	26.5	72	305.773	0.28	15.1	135	81	26	0	0	0	0	0	0	0	0	0	0	0	0	0	0	1911	70.81	74.58	11.89	6.7	2.4	137	5.7	28.7	3.3569	0	NA	NA	NA	NA	0
94957	0	43	3	0	2	2.99	25.6	72	414.857	1.25	17	122	85	33	1	0	0	0	0	0	0	0	0	0	0	0	0	0	932	59.58	41.69	7.61	6	1.37	582	5.4	23.6	3.16125	0	NA	NA	NA	NA	2
94958	1	58	5	2	2	5	11.6	73	420	0.58	12.4	165	89	21.2	0	0	0	1	0	0	0	0	0	0	0	0	0	0	2294	85.15	103.99	14.65	4.81	1.73	25	5.5	38.6	3.65325	0	NA	NA	NA	NA	0
94959	0	48	4	1	2	5	9.1	77	541.471	3.54	14	123	82	31.2	0	0	0	1	0	0	0	0	0	0	0	0	0	0	1595	37.71	43.18	7.94	3.34	1.14	576	5	87.8	4.47506	0	NA	NA	NA	NA	0
94960	0	26	3	0	2	1.24	19.7	77	696.6	5.15	15.2	113	61	21.2	1	1	0	0	0	0	0	0	0	0	0	0	0	0	4036	107.96	160.01	23.55	3.98	1.5	177	4.9	23.7	3.16548	57.5	NA	NA	NA	NA	1
94962	1	57	5	2	2	5	9.3	77	639	2.16	13.4	125	77	19.9	0	0	0	1	0	0	0	0	0	0	0	0	0	0	1151	60.96	37.68	9.32	5.38	2.35	146	5.6	36.6	3.60005	0	NA	NA	NA	NA	0
94964	0	48	1	2	0	1.47	4.7	74	847.464	0.59	11.4	109	53	29.4	1	1	0	0	0	0	0	0	0	0	0	0	0	0	1750	74.05	47.14	11.46	4.32	1.47	6.47	5.8	102	4.62497	22.3	NA	NA	NA	NA	1
94966	0	44	5	2	0	1.22	16.7	75	483	1.49	15.7	115	83	27.5	1	0	1	1	0	0	0	0	0	0	0	0	0	0	1472	58.77	81.88	12.07	3.78	0.75	215	7.3	50.6	3.92395	0	NA	NA	NA	NA	2
94967	1	40	4	1	2	5	5.6	73	294	6.53	12.9	133	91	34.8	0	0	0	0	0	0	0	0	0	0	0	0	0	0	1660	81.33	45.66	24.01	4.29	1.55	27.4	5.1	59.2	4.08092	0	NA	NA	NA	NA	0
94969	0	80	3	0	1	1.11	9	68	552	4.22	15.9	133	71	29.6	0	0	0	0	0	1	NA	NA	NA	NA	NA	NA	NA	NA	1321	55.58	62.52	6.36	5.4	0.83	197	5.3	73.5	4.29729	0	26	NA	NA	NA	0
94970	0	55	1	2	0	1.98	35.6	69	396.5	4.19	16.6	173	109	29	1	1	0	0	0	0	0	0	0	0	0	0	0	0	2048	71.55	49.66	8.47	5.69	1.24	145	5	21.9	3.08649	70.2	NA	NA	NA	NA	1
94972	1	39	3	0	1	1.5	3.6	68	692.739	7.53	12.3	121	71	30.8	1	0	0	0	0	0	0	0	0	0	0	0	0	0	1294	26.96	43.72	4.92	3.75	0.88	14	5.2	49.2	3.89589	0	NA	NA	NA	NA	1
94975	0	56	4	1	2	3.92	20.8	72	403.238	1.07	15.9	125	84	24	0	1	0	0	0	0	0	0	0	0	0	0	0	0	2436	84.59	109.95	12.46	5.61	1.55	270	5.9	26.7	3.28466	6	NA	NA	NA	NA	0
94979	0	66	4	1	1	2.54	14.9	75	294.381	1.48	15	144	97	38.1	0	0	0	1	0	0	0	0	0	0	0	0	0	0	2370	94.68	106.35	10.55	3.44	0.88	222	6	29.6	3.38777	0	NA	NA	NA	NA	0
94982	1	32	4	1	2	1.82	13.8	100	540	0.27	13	101	61	20.8	0	0	0	0	0	0	0	0	0	0	0	0	0	0	3935	149.58	201.07	20.75	3.96	0.96	191	5.4	26	3.2581	0	NA	NA	NA	NA	0
94986	0	62	3	0	2	5	16.3	70	394.211	0.76	15.1	139	85	35.3	0	0	0	1	0	0	0	0	0	0	0	0	0	0	1595	95.85	57.01	7.9	6.13	1.06	604	5.7	34.1	3.5293	0	NA	NA	NA	NA	0
94987	1	63	3	0	1	2.19	14.3	65	1670.9	33.2	11.5	94	64	49.1	0	0	1	1	0	0	0	0	0	0	0	0	0	0	2057	74.39	107.25	14.17	4.09	0.93	114	7.1	40	3.68888	0	NA	NA	NA	NA	0
94989	0	35	5	2	0	1.68	15.6	68	461.704	1.95	15	107	69	25.1	1	0	0	0	0	0	0	0	0	0	0	0	0	0	1661	63.6	66.07	14.53	6.13	1.29	50.9	5.5	34	3.52636	0	NA	NA	NA	NA	1
94993	1	80	3	0	1	0.51	9.1	65	1081.2	3.34	12.6	146	51	25.6	0	0	0	0	0	1	NA	NA	NA	NA	NA	NA	NA	NA	2107	82.36	69.67	21.75	5.4	1.58	78.5	5.5	33.6	3.51453	0	16	NA	NA	NA	0
94995	0	58	5	2	2	4.93	10.7	70	607.091	1.11	16.2	130	69	29.1	0	0	0	0	0	0	0	0	0	0	0	0	0	0	2884	111.36	133.29	12.11	6.52	1.32	469	6.7	37.4	3.62167	0	NA	NA	NA	NA	0
94997	1	44	2	2	2	0.25	8.2	72	449.143	0.77	13.1	115	74	19.6	0	0	0	0	0	0	0	0	0	0	0	0	0	0	3097	139.49	63.75	26.38	4.91	1.86	61.5	5.8	32.9	3.49347	0	NA	NA	NA	NA	0
94998	0	45	3	0	2	0.66	22.7	75	521.864	2.34	15.8	107	78	27.3	0	0	0	0	0	0	0	0	0	0	0	0	0	0	1871	69.55	64.54	18.59	5.17	1.06	140	5.2	26	3.2581	0	NA	NA	NA	NA	0
95000	1	76	5	2	2	0.87	13.3	70	967.75	12.52	11.5	152	65	33.8	0	0	0	1	0	0	0	0	0	0	0	0	0	0	1911	70.81	74.58	11.89	5.25	0.8	76.6	6.9	42.7	3.7542	0	NA	NA	NA	NA	0
95001	1	80	3	0	2	1.4	10.9	71	476.895	2.31	13.9	167	77	30.3	1	0	1	1	0	0	0	0	0	0	0	0	0	0	2121	118.35	92.09	16.98	3.9	1.4	27.4	7	67.6	4.21361	0	NA	NA	NA	NA	2
95002	0	26	1	2	0	1.46	12.9	69	384.818	1.44	15.4	112	69	28.9	1	1	0	0	0	0	0	0	0	0	0	0	0	0	1484	80.26	75.76	7.71	4.86	0.93	156	5.2	38.7	3.65584	14.9	NA	NA	NA	NA	1
95004	0	80	3	0	1	5	23.5	69	486.75	1.88	14.2	154	87	27.2	1	0	0	1	0	0	0	0	0	0	0	0	0	0	1911	70.81	74.58	11.89	4.37	1.86	170	5.7	26.1	3.26194	0	NA	NA	NA	NA	2
95007	0	79	3	0	0	1.58	16.7	70	453.75	1.78	15.4	103	53	24.4	1	0	0	0	1	0	0	0	0	0	0	0	0	0	1483	65.68	33.64	12.11	4.34	1.66	250	5.1	32.9	3.49347	0	NA	NA	NA	NA	2
95013	0	56	3	0	2	5	5.6	73	1161.33	2.28	13.4	141	83	33.4	0	0	1	1	0	1	NA	NA	NA	NA	NA	NA	NA	NA	1566	43.6	57.65	8.57	5.35	1.32	9.16	6.3	64.7	4.16976	0	25	NA	NA	NA	0
95014	0	35	1	2	2	3.65	6.4	71	414.4	0.58	13.9	137	89	33.5	0	0	0	0	0	0	0	0	0	0	0	0	0	0	2479	68.05	63.6	14.96	6.18	0.98	12.1	5.5	76.2	4.33336	0	NA	NA	NA	NA	0
95019	0	40	3	0	1	0.88	26.1	76	289.676	0.55	18.6	121	91	24.3	1	1	0	0	0	0	0	0	0	0	0	0	0	0	3733	60.24	41.83	7.52	4.99	1.99	202	5.3	23.6	3.16125	252.7	NA	NA	NA	NA	1
95020	1	80	4	1	2	2.47	11.8	71	741.789	1.61	11.6	163	62	26.1	1	0	1	1	0	0	0	0	0	0	0	0	0	0	1180	44.05	37.83	19.68	2.72	0.91	69.5	6.9	39.3	3.67122	0	NA	NA	NA	NA	2
95025	0	57	3	0	2	5	16.5	68	697.917	10.3	13.9	135	90	37.4	0	0	0	1	0	0	0	0	0	0	0	0	0	0	3103	119.87	126.21	14.59	4.01	1.19	209	5.8	24.5	3.19867	0	NA	NA	NA	NA	0
95026	0	20	4	1	2	0.25	19.2	75	418.2	0.42	13.5	111	68	24.2	0	0	0	0	0	0	0	0	0	0	0	0	0	0	4428	185.87	154.92	24.24	4.97	1.53	102	5.8	35.4	3.56671	0	NA	NA	NA	NA	0
95027	1	76	5	2	0	0.04	12.2	73	753.429	7.79	13.3	171	77	22.6	1	0	1	0	0	0	0	0	0	0	0	0	0	0	1249	50.77	57.41	8.57	8.56	1.06	499	6	37.9	3.63495	0	NA	NA	NA	NA	2
95028	0	30	3	0	0	0.98	16.8	70	246.615	0.78	14.8	105	72	30.4	1	0	0	0	0	0	0	0	0	0	0	0	0	0	2023	61.19	123.79	10.81	6.1	1.09	221	4.3	30.1	3.40453	0	NA	NA	NA	NA	2
95029	1	43	4	1	2	1.44	2.7	71	1229.1	0.67	9.3	171	93	32.9	0	0	0	0	0	0	0	0	0	0	0	0	0	0	1885	39.43	80.46	6.1	5.53	1.34	3.64	5.4	171	5.14166	0	NA	NA	NA	NA	0
95030	0	63	5	2	2	1.3	10.4	80	217.226	5.92	14.3	171	103	25.1	1	0	0	1	0	1	NA	NA	NA	NA	NA	NA	NA	NA	2964	76.76	106.68	13.84	6.03	0.98	481	5.8	74.7	4.31348	0	23	NA	NA	NA	2
95031	1	54	3	0	1	5	19.2	68	697.833	38.64	12.7	128	74	43.8	1	0	1	1	0	0	0	0	0	0	0	0	0	0	4198	116.06	246.4	20.5	4.37	1.4	372	6.6	35	3.55535	0	NA	NA	NA	NA	2
95033	1	49	5	2	0	2.12	9.9	78	532.48	0.61	12.7	127	73	24	0	0	1	1	0	0	0	0	0	0	0	0	0	0	1911	70.81	74.58	11.89	5.3	1.16	19.6	8.3	36.8	3.6055	0	NA	NA	NA	NA	0
95034	1	61	3	0	2	3.08	22.4	68	311.769	1.11	13.2	97	60	23.7	0	0	0	0	0	0	0	0	0	0	0	0	0	0	1663	83.63	59.8	13.07	5.17	1.68	75	5.2	27.7	3.32143	0	NA	NA	NA	NA	0
95036	0	80	3	0	2	3.33	19.7	71	184.45	2.42	15.2	121	65	36.6	1	0	0	1	0	1	NA	NA	NA	NA	NA	1	1	NA	959	54.81	41.45	6.51	4.65	0.91	84.1	6.1	49.1	3.89386	0	16	30	NA	NA	2
95042	1	65	2	2	0	0.93	14.1	78	290.862	3.09	13.7	122	72	32	0	0	1	1	0	0	0	0	0	0	0	0	0	0	963	35.44	43.19	5.41	4.32	1.16	136	8.1	33.6	3.51453	0	NA	NA	NA	NA	0
95043	0	64	5	2	0	1.92	18.3	66	343	0.37	11.6	137	65	22.2	1	0	0	0	0	0	0	0	0	0	0	0	0	0	1911	70.81	74.58	11.89	4.91	1.81	380	5.5	47.4	3.85862	0	NA	NA	NA	NA	1
95044	1	67	3	0	2	4.56	20.2	67	284.2	5.14	14.7	189	73	40	1	1	0	1	0	0	0	0	0	0	0	0	0	0	2137	108.08	100.13	13.94	8.17	1.27	102	6.1	32.7	3.48738	34.7	NA	NA	NA	NA	2
95045	1	69	3	0	2	5	18.4	74	557.846	4.73	15.6	129	81	28.5	0	0	0	1	0	0	0	0	0	0	0	0	0	0	1412	51.13	55.78	13.62	5.82	1.55	131	5.8	38.5	3.65066	0	NA	NA	NA	NA	0
95046	1	63	4	1	2	0.92	11.3	73	185.714	1.12	11.8	199	85	25.9	1	0	0	1	1	0	0	0	0	0	0	0	0	0	1700	58.64	103.46	5.97	5.04	2.46	140	5.9	48.5	3.88156	0	NA	NA	NA	NA	2
95048	0	23	3	0	2	4.62	11.3	70	237.6	0.4	15.6	109	57	26.5	1	1	0	0	0	0	0	0	0	0	0	0	0	0	2507	88.15	88.62	12.99	4.65	1.06	152	5.2	37.4	3.62167	46.8	NA	NA	NA	NA	2
95051	0	52	4	1	2	3.34	10.2	76	399.118	12.92	16.1	157	94	47	1	0	1	1	0	0	0	0	0	0	0	0	0	0	3214	61.82	120.93	12.15	5.46	0.72	49.2	9.4	63	4.14313	0	NA	NA	NA	NA	1
95056	1	34	5	2	2	0.98	12.9	67	858.174	4.25	13	130	79	41.1	1	0	0	0	0	0	0	0	0	0	0	0	0	0	1969	80.34	82.34	14.1	5.35	1.24	59.1	5.4	35.3	3.56388	0	NA	NA	NA	NA	1
95057	0	71	3	0	2	4.56	19.9	71	231	1.29	14.9	128	66	28.9	0	0	1	0	0	1	NA	NA	NA	NA	NA	NA	NA	NA	1374	49.92	48.49	21.47	4.37	1.01	317	6.2	31.5	3.44999	0	25	NA	NA	NA	0
95058	1	36	3	0	0	4.81	8.4	66	449.292	9.14	13.5	129	72	63.4	0	0	1	0	0	0	0	0	0	0	0	0	0	0	1741	34.08	55.22	8	4.84	0.98	126	5.8	44.6	3.79773	0	NA	NA	NA	NA	0
95059	0	53	3	0	0	0	12.4	76	591.25	2.71	13.3	234	101	33.1	0	0	0	1	0	0	0	0	0	0	0	0	0	0	1783	87.16	87.4	10.67	5.59	1.68	407	5.1	32	3.46574	0	NA	NA	NA	NA	0
95060	1	44	5	2	2	1.96	9.7	76	830.25	1.62	13.2	126	75	24.3	0	0	1	1	0	0	0	0	0	0	0	0	0	0	1810	112.51	64.7	15.85	4.22	1.6	25.8	5	35.8	3.57795	0	NA	NA	NA	NA	0
95061	0	45	1	2	1	2.79	14	73	473.837	1.4	14.7	115	77	25.3	1	0	0	0	0	0	0	0	0	0	0	0	0	0	3665	108.63	132.89	28.4	6.72	1.53	247	6.2	24	3.17805	0	NA	NA	NA	NA	1
95062	0	61	4	1	2	0.74	13.6	77	460.8	1.66	14.9	131	84	24	0	0	1	1	1	0	0	0	0	0	0	0	0	0	660	23.31	24.44	10.31	4.16	1.37	162	5.9	39.1	3.66612	0	NA	NA	NA	NA	0
95063	1	46	3	0	1	0.29	30.4	76	565.6	1.53	13.4	103	76	29.5	0	0	0	0	0	0	0	0	0	0	0	0	0	0	729	39.81	22.43	2.8	5.59	1.24	24.2	5.1	32.9	3.49347	0	NA	NA	NA	NA	0
95066	1	73	2	2	1	0.17	13.4	69	263.2	1.35	12.6	125	63	22.4	0	0	1	1	0	1	1	1	NA	NA	NA	NA	NA	NA	1662	40.36	54.87	10.35	4.99	2.04	161	5.7	37.5	3.62434	0	14	NA	NA	NA	0
95067	1	55	4	1	1	2.79	11.3	72	588	9.42	12.4	135	89	51.2	0	0	1	0	0	0	0	0	0	0	0	0	0	0	3256	99.54	131.04	14.06	3.85	1.55	276	6	37.6	3.627	0	NA	NA	NA	NA	0
95068	1	80	3	0	0	2.9	11.1	71	1125	0.67	14.7	135	48	26.3	1	0	1	1	1	1	1	1	NA	NA	NA	NA	NA	NA	1911	70.81	74.58	11.89	3.15	0.96	40.2	8.1	45.1	3.80888	0	14	NA	NA	NA	2
95069	0	26	3	0	1	1.96	10.7	71	540.853	2.32	15.3	111	65	24.4	1	0	0	0	0	0	0	0	0	0	0	0	0	0	3107	130.51	141.48	17.55	4.16	1.22	79.7	5.4	23.2	3.14415	0	NA	NA	NA	NA	1
95071	1	38	3	0	0	0.35	8.4	72	517.778	2.72	12.5	122	72	28.1	0	0	0	1	0	0	0	0	0	0	0	0	0	0	1911	70.81	74.58	11.89	4.78	1.22	16.5	4.9	34.2	3.53223	0	NA	NA	NA	NA	0
95073	1	71	1	2	1	4.13	12	80	747.25	9.49	13.8	135	73	43.4	1	0	1	0	0	1	NA	NA	NA	NA	NA	NA	NA	NA	1012	25.92	32.76	7.81	5.72	1.32	116	6.2	37.8	3.63231	0	31	NA	NA	NA	2
95077	0	47	5	2	2	3.86	24.9	72	212.609	0.65	15	119	82	25	1	0	0	0	0	0	0	0	0	0	0	0	0	0	2392	148.56	96.12	13.15	5.64	1.09	650	5.7	23.8	3.16969	0	NA	NA	NA	NA	1
95083	0	37	3	0	1	1.63	15.2	75	918	9.97	15.8	137	101	42.9	0	0	0	1	0	0	0	0	0	0	0	0	0	0	2766	89.17	115.35	18.72	5.92	0.91	281	5.4	30.3	3.41115	0	NA	NA	NA	NA	0
95088	1	50	1	2	2	2.43	17.6	71	253.571	0.84	13.4	127	67	33.1	0	0	0	0	0	0	0	0	0	0	0	0	0	0	1425	84.76	56.78	12.17	4.78	0.93	50.1	5.9	27.6	3.31782	0	NA	NA	NA	NA	0
95089	1	31	4	1	0	1.43	4.5	71	389.867	4.32	10.6	159	97	32.8	1	0	0	1	0	0	0	0	0	0	0	0	0	0	1775	36.77	55.35	7.14	4.73	0.93	43	6.6	35.8	3.57795	0	NA	NA	NA	NA	1
95091	0	62	4	1	1	0.95	27.2	81	205.467	0.37	14.9	133	67	24.2	1	0	0	1	0	0	0	0	0	0	0	0	0	0	2979	105.76	90.22	16.09	6.52	2.04	708	4.9	46.8	3.84588	0	NA	NA	NA	NA	1
95093	1	51	1	2	1	0.96	7.9	77	308	1.33	12.2	123	86	28.9	0	0	0	0	0	0	0	0	0	0	0	0	0	0	1912	64.79	85.8	12.4	6.93	1.68	3.52	5.8	57.2	4.04655	0	NA	NA	NA	NA	0
95094	1	37	2	2	0	0.48	13.3	68	723.273	1.07	13.9	122	72	28.4	0	0	0	0	0	0	0	0	0	0	0	0	0	0	1277	83.6	40.23	8.46	4.86	1.11	146	6	19.2	2.95491	0	NA	NA	NA	NA	0
95095	1	80	3	0	2	1.94	17.9	69	855.9	3.03	14.9	164	77	34.5	1	0	0	1	0	0	0	0	0	0	0	0	0	0	1744	79.36	72.22	14.01	5.02	1.6	122	5.7	38.1	3.64021	0	NA	NA	NA	NA	2
95096	0	21	1	2	2	2	14.9	72	226.667	3.55	15.2	119	65	36.9	0	0	0	0	0	0	0	0	0	0	0	0	0	0	1911	70.81	74.58	11.89	4.16	1.06	127	5.3	37.5	3.62434	0	NA	NA	NA	NA	0
95097	1	66	3	0	2	5	23.6	68	349.6	0.73	14.1	123	73	27.3	0	0	0	0	0	0	0	0	0	0	0	0	0	0	2793	90.03	110.98	14.66	5.4	2.02	75.1	5.7	26	3.2581	0	NA	NA	NA	NA	0
95099	1	70	5	2	1	3.86	15.6	70	320	0.45	13.3	133	75	19.8	0	0	0	0	0	0	0	0	0	0	0	0	0	0	1253	112.1	45.37	6.22	5.69	1.55	188	5.9	30.8	3.42751	0	NA	NA	NA	NA	0
95101	1	80	3	0	0	0.65	14.3	71	1131	2.01	12.4	125	63	29.2	0	0	0	0	0	0	0	0	0	0	0	0	0	0	995	38.65	43.66	9.65	4.73	1.33	111	5.3	32.5	3.48124	0	NA	NA	NA	NA	0
95102	1	61	5	2	2	2.44	10.2	70	290.938	3.22	13.6	122	72	29	0	0	0	0	0	0	0	0	0	0	0	0	0	0	1269	27.84	46.15	7.34	5.51	1.45	96.7	5.5	44.7	3.79997	0	NA	NA	NA	NA	0
95103	0	39	2	2	2	5	16.5	75	335.5	0.71	15.1	128	76	28.9	0	1	0	0	0	0	0	0	0	0	0	0	0	0	4138	151.91	210.82	23.91	4.94	1.24	43.2	5.2	32.3	3.47507	28.1	NA	NA	NA	NA	0
95105	0	67	3	0	2	2.61	13.6	64	763.636	1.08	15.3	111	68	28.6	1	1	1	1	1	1	NA	NA	NA	NA	NA	1	1	NA	3310	144.17	160.07	22.39	4.63	1.34	415	6.2	25.4	3.23475	11.2	30	NA	NA	NA	2
95110	1	67	1	2	2	5	20.8	62	276.75	0.48	13.2	172	80	27.9	1	0	0	1	1	1	NA	NA	NA	NA	NA	NA	NA	NA	1342	58.76	68.61	7.72	4.16	1.42	122	4.8	36	3.58352	0	24	NA	NA	NA	2
95113	1	20	1	2	1	3.25	16.3	68	462	2.65	13.6	109	50	32.6	0	0	0	0	0	0	0	0	0	0	0	0	0	0	1247	99.45	50.3	9.43	3.65	1.42	27.5	5	33.5	3.51155	0	NA	NA	NA	NA	0
95114	0	34	1	2	2	3.52	7	74	460.647	2.48	15.4	115	66	35.7	0	0	0	0	0	0	0	0	0	0	0	0	0	0	1207	58.89	52.26	6.19	6.36	0.62	181	5.7	27.1	3.29953	0	NA	NA	NA	NA	0
95115	1	33	4	1	0	1.63	9.5	72	645.28	0.7	13.6	107	69	20.9	0	0	0	0	0	0	0	0	0	0	0	0	0	0	707	23.65	9.68	7.77	4.11	1.63	22.5	5.2	38.6	3.65325	0	NA	NA	NA	NA	0
95118	0	57	5	2	2	5	18.6	79	384.867	1.02	16.3	159	95	26.3	0	0	0	1	0	0	0	0	0	0	0	0	0	0	1135	44.19	46.79	6.83	6.49	1.09	622	6.2	27.5	3.31419	0	NA	NA	NA	NA	0
95123	1	50	2	2	2	5	14.3	67	338.452	10.14	13.5	123	85	35.2	0	0	1	0	0	0	0	0	0	0	0	0	0	0	2686	131.23	141.5	10.87	4.76	1.47	48.8	5.9	34.6	3.54385	0	NA	NA	NA	NA	0
95124	0	58	4	1	0	2.14	19	75	274.4	9.48	12.7	149	87	16.8	1	1	0	1	0	0	0	0	0	0	0	0	0	0	3084	121.71	93.27	15.98	4.16	0.98	130	5.1	40.5	3.7013	89.3	NA	NA	NA	NA	1
95129	0	60	1	2	0	1.18	11.8	75	656	8.83	13.6	147	77	56.3	1	0	1	0	0	0	0	0	0	0	0	0	0	0	1838	103.72	44.65	11.12	4.32	0.98	291	6.1	32.2	3.47197	0	NA	NA	NA	NA	2
95131	0	60	3	0	1	1.82	31.2	68	212	0.45	15.3	97	69	25.2	0	0	0	0	0	0	0	0	0	0	0	0	0	0	1526	50.25	42.67	11.91	4.22	1.24	234	5.8	34.3	3.53515	0	NA	NA	NA	NA	0
95134	0	37	1	2	1	0.33	19.9	72	388.125	1.25	15.5	121	77	27.1	0	0	0	0	0	0	0	0	0	0	0	0	0	0	1378	58.84	18.99	9.57	5.64	1.03	26.1	5.1	32.1	3.46886	0	NA	NA	NA	NA	0
95135	0	78	3	0	2	1.29	9	54	891	14.04	9.3	134	69	28.7	1	1	0	1	1	1	NA	NA	NA	NA	NA	NA	NA	NA	1257	52.54	63.86	6.46	5.74	1.01	142	5.2	58.2	4.06389	14	24	NA	NA	NA	2
95137	1	53	3	0	2	5	15.6	72	358.545	0.83	14.9	105	73	22.1	0	1	0	0	0	0	0	0	0	0	0	0	0	0	1262	32.59	58.91	2.04	4.81	1.6	198	5.4	31.9	3.46261	53.2	NA	NA	NA	NA	0
95138	1	71	3	0	0	3.65	9.9	69	744.208	0.18	14.2	128	48	21	1	0	0	1	0	1	NA	NA	NA	NA	NA	NA	NA	NA	1835	108.88	83.3	17.28	4.53	1.99	19.6	5.7	34.7	3.54674	0	33	NA	NA	NA	1
95140	1	42	1	2	2	4.07	18.8	71	1327.08	1.27	13.9	122	72	29.8	0	1	0	1	0	0	0	0	0	0	0	0	0	0	2387	65.34	86.79	14.17	5.79	2.56	67.5	5.1	30	3.4012	37	NA	NA	NA	NA	0
95143	1	51	1	2	1	1.89	10.7	72	348.333	0.32	13.2	117	76	21.5	1	0	0	0	0	0	0	0	0	0	0	0	0	0	1407	77.27	65.24	6.56	4.45	1.45	169	5.6	29.7	3.39115	0	NA	NA	NA	NA	2
95149	1	48	3	0	1	1.96	8.8	69	909.926	13.18	12.4	133	51	44.9	0	1	0	1	0	0	0	0	0	0	0	0	0	0	3503	68.36	89.31	24.12	4.81	1.16	130	5.8	31	3.43399	63	NA	NA	NA	NA	0
95151	1	80	3	0	1	1.36	7.3	60	494.476	1.12	11.5	117	74	34.5	0	0	1	0	1	0	0	0	0	0	0	0	0	0	1469	73.57	88.04	7.31	5.02	1.4	25.2	6.2	105	4.65396	0	NA	NA	NA	NA	0
95152	0	59	4	1	2	0.41	14.5	70	202.4	0.71	15.3	159	83	26.6	0	1	0	1	0	0	0	0	0	0	0	0	0	0	2333	76.84	102.6	11.97	2.77	1.68	336	5.9	19.2	2.95491	28.1	NA	NA	NA	NA	0
95153	1	23	3	0	1	1.59	10.4	72	850	11.37	13	111	45	43.4	1	0	0	0	0	0	0	0	0	0	0	0	0	0	1826	68.51	65.65	13.67	4.91	1.5	26.3	4.9	69.3	4.23844	0	NA	NA	NA	NA	1
95155	0	62	1	2	0	0.23	11.6	66	536.154	0.36	8.4	208	81	24.9	1	0	1	1	1	0	0	0	0	0	0	0	0	0	2857	196.11	127.65	15.51	2.61	1.19	50.8	6.5	34.2	3.53223	0	NA	NA	NA	NA	2
95165	1	39	4	1	2	4.57	14.3	71	340	2.01	13.7	126	83	27.5	0	0	0	1	0	0	0	0	0	0	0	0	0	0	1415	56.53	56.98	8.68	4.73	1.33	256	5.5	27.4	3.31054	0	NA	NA	NA	NA	0
95168	1	59	4	1	2	2.64	10.9	65	631.176	1.79	12	138	79	24.7	0	0	0	1	0	0	0	0	0	0	0	0	0	0	2657	95.47	130.03	9.46	4.47	1.29	59	6.6	42.7	3.7542	0	NA	NA	NA	NA	0
95169	1	61	5	2	0	1.92	8.1	73	475.135	1.99	12.9	122	72	25.9	0	0	0	1	0	0	0	0	0	0	0	0	0	0	1911	70.81	74.58	11.89	5.9	1.55	82.9	5.4	34.8	3.54962	0	NA	NA	NA	NA	0
95170	1	67	5	2	0	4.08	8.8	76	579.857	7.26	12.6	144	78	34	0	0	0	0	0	0	0	0	0	0	0	0	0	0	1053	45.17	38.55	7.38	4.94	1.71	15.5	6.8	53	3.97029	0	NA	NA	NA	NA	0
95171	1	41	3	0	1	1.67	21.1	71	478.947	3.09	14.6	115	75	40.2	1	0	1	0	0	0	0	0	0	0	0	0	0	0	2550	86.79	109.88	12.48	3.59	1.06	107	7	28.6	3.35341	0	NA	NA	NA	NA	1
95172	1	71	1	2	0	3.11	13.1	70	370.895	2.06	12.2	192	76	26.6	0	0	1	1	0	0	0	0	0	0	0	0	0	0	1736	72.37	51.89	14.77	7.86	1.06	138	8.5	36.6	3.60005	0	NA	NA	NA	NA	0
95173	0	80	4	1	0	1	8.6	69	355.25	0.49	13.2	129	58	37.6	1	0	1	1	1	0	0	0	0	0	0	0	0	0	724	32.29	20.34	5.68	3.31	1.71	47.8	7.4	35.8	3.57795	0	NA	NA	NA	NA	2
95174	1	25	5	2	2	1.05	8.4	70	696	17.11	14.2	101	75	29.4	1	0	0	0	0	0	0	0	0	0	0	0	0	0	1911	70.81	74.58	11.89	3.83	1.09	60.9	5.2	36.9	3.60821	0	NA	NA	NA	NA	1
95179	1	31	3	0	2	0.91	10.6	75	821.76	10.04	13.3	113	74	47	0	0	0	0	0	0	0	0	0	0	0	0	0	0	889	47.56	40.03	3.59	5.64	1.71	47.9	5.2	35.6	3.57235	0	NA	NA	NA	NA	0
95181	0	39	3	0	2	5	19.2	64	290.889	0.66	13.2	115	69	21.3	1	0	0	0	0	0	0	0	0	0	0	0	0	0	2880	96.75	155.44	22.94	4.86	2.51	161	5.4	28.3	3.34286	0	NA	NA	NA	NA	2
95182	0	56	2	2	2	5	12.4	63	872.421	2.81	15.7	141	93	34.7	0	1	0	1	0	0	0	0	0	0	0	0	0	0	1689	55.68	47.45	10.75	4.81	1.01	323	5.3	31.4	3.44681	28	NA	NA	NA	NA	0
95186	1	28	5	2	2	4.86	9	80	517.769	2.35	12.9	113	63	27.2	0	0	0	0	0	0	0	0	0	0	0	0	0	0	2171	59.18	77.34	18.15	4.58	1.22	44.6	5.9	34.1	3.5293	0	NA	NA	NA	NA	0
95189	0	66	4	1	2	1.44	19.9	69	301	6.02	14.2	179	82	36	1	0	0	0	1	0	0	0	0	0	0	0	0	0	1461	42.83	62.32	9.17	4.4	1.14	84.9	5.6	24.4	3.19458	0	NA	NA	NA	NA	2
95190	1	28	1	2	2	1.66	36.5	73	324.235	2	14.1	111	64	19	1	1	0	0	0	0	0	0	0	0	0	0	0	0	3649	117.38	175.65	20.64	3.88	1.84	98.7	5.2	20.4	3.01553	33.9	NA	NA	NA	NA	2
95191	1	54	1	2	0	0.51	14.5	73	594	5.54	14.5	125	76	35.3	0	0	1	1	0	0	0	0	0	0	0	0	0	0	807	50.64	19.25	3.2	6.1	1.16	86.8	6.5	18.9	2.93916	0	NA	NA	NA	NA	0
95197	0	34	3	0	1	1.71	16.3	75	1507.33	3.36	16.4	130	77	36.5	1	1	0	1	0	0	0	0	0	0	0	0	0	0	2346	51.39	45.55	5.78	7.11	1.32	105	5.3	29.7	3.39115	112.3	NA	NA	NA	NA	1
95199	1	61	4	1	1	2.45	7.9	74	525.692	14.34	11.9	135	67	38.6	0	0	0	1	0	0	0	0	0	0	0	0	0	0	2227	90.06	144.84	5.68	5.07	1.71	136	6.5	36.5	3.59731	0	NA	NA	NA	NA	0
95200	1	23	1	2	1	0.81	29.2	70	365.5	0.89	13.2	96	44	25.1	1	0	0	0	0	0	0	0	0	0	0	0	0	0	3010	95.25	160.61	20.34	3.65	1.27	39.5	5	27.7	3.32143	0	NA	NA	NA	NA	1
95202	1	23	3	0	2	5	9.3	75	410.4	0.98	13.9	122	72	25.1	0	0	0	0	0	0	0	0	0	0	0	0	0	0	2873	84.18	153.84	9.94	4.76	1.71	22	4.8	41.3	3.72086	0	NA	NA	NA	NA	0
95203	0	54	4	1	2	1.59	19	67	1202.25	5.32	16	139	88	25.4	1	1	0	1	0	0	0	0	0	0	0	0	0	0	2182	71.84	72.92	28.08	6.75	1.55	64	5.3	32.1	3.46886	29.8	NA	NA	NA	NA	2
95206	0	47	4	1	2	2.37	17.4	69	1076.47	0.99	12.8	123	82	19.2	0	0	0	0	0	0	0	0	0	0	0	0	0	0	2431	81.86	81.4	16.07	4.5	1.47	28.1	6	17	2.83321	0	NA	NA	NA	NA	0
95208	0	78	1	2	2	1.92	15.4	66	187.5	0.68	14.4	149	81	26.1	1	0	0	0	0	0	0	0	0	0	0	0	0	0	2459	81.17	81.45	25.27	4.58	1.24	76.5	5.3	37.2	3.61631	0	NA	NA	NA	NA	2
95210	1	44	3	0	2	5	18.1	69	738.947	3.55	12.9	113	79	28.1	0	0	0	0	0	0	0	0	0	0	0	0	0	0	1458	83.83	67.91	12.28	5.61	1.55	25.4	5	21.9	3.08649	0	NA	NA	NA	NA	0
95211	1	22	1	2	2	3.83	12.4	68	391.6	3.85	14.1	109	73	19.8	0	0	0	0	0	0	0	0	0	0	0	0	0	0	1256	79.48	24.7	10.73	4.5	1.73	25.8	4.6	30.7	3.42426	0	NA	NA	NA	NA	0
95213	0	25	1	2	0	5	18.4	75	500.52	0.5	13.9	125	56	23.8	1	0	0	0	0	0	0	0	0	0	0	0	0	0	2988	115.57	130.01	15.91	4.32	1.6	197	5.8	23.1	3.13983	0	NA	NA	NA	NA	2
95214	0	70	4	1	2	1.29	23.3	71	132.3	0.29	13.6	155	76	26.3	1	1	0	0	0	0	0	0	0	0	0	0	0	0	2192	72.37	77.63	25.31	5.92	2.02	224	5.8	37.2	3.61631	0.5	NA	NA	NA	NA	2
95215	1	52	3	0	2	0.21	21.1	73	660	3.79	16	151	83	37.1	1	1	1	0	0	0	0	0	0	0	0	0	0	0	2779	51.01	66.94	9.31	6.7	1.03	152	7.8	32.5	3.48124	107.8	NA	NA	NA	NA	1
95216	0	50	5	2	2	4.93	15.4	72	271.8	0.42	14.6	111	79	25.9	1	0	0	1	0	0	0	0	0	0	0	0	0	0	1555	58.6	25.48	11.66	5.25	1.06	209	5.8	28	3.3322	0	NA	NA	NA	NA	1
95220	1	61	1	2	1	1.59	10	77	423.077	3.57	13.5	128	75	29.3	0	0	0	0	0	0	0	0	0	0	0	0	0	0	1677	62.48	67.32	11.72	6.1	1.5	99.7	5.4	28	3.3322	0	NA	NA	NA	NA	0
95221	1	35	5	2	2	0.82	12.7	66	538.9	1.02	13.9	99	61	24.2	1	0	0	0	0	0	0	0	0	0	0	0	0	0	918	17.15	21.67	3.7	4.68	2.02	9.8	5.1	26.6	3.28091	0	NA	NA	NA	NA	1
95224	0	73	5	2	2	3.95	26	76	1450.11	7.39	14.8	155	78	24.5	1	1	0	1	0	0	0	0	0	0	0	0	0	0	3648	79.75	142.01	12.47	5.38	1.89	77	5.8	20.3	3.01062	58	NA	NA	NA	NA	1
95227	0	22	5	2	2	3.85	29	73	235.826	0.51	15	109	48	26.9	0	1	0	0	0	0	0	0	0	0	0	0	0	0	1855	50.52	66.2	6.46	6.47	1.24	282	5.5	28.9	3.36384	16.9	NA	NA	NA	NA	0
95228	0	46	3	0	2	5	27.4	76	385.821	1.63	16	125	92	25.9	0	0	0	1	0	0	0	0	0	0	0	0	0	0	2115	54.37	92.69	8.91	5.43	1.24	123	5.5	22.3	3.10459	0	NA	NA	NA	NA	0
95231	0	32	5	2	0	1.7	10.6	70	606.364	0.43	15.6	125	75	28.7	1	1	0	1	0	0	0	0	0	0	0	0	0	0	926	38.4	13.41	5.64	4.47	1.24	118	5.6	29.5	3.38439	11.2	NA	NA	NA	NA	1
95233	1	21	1	2	1	1.22	15.4	73	802.286	2.86	14.9	123	64	38.2	0	1	0	0	0	0	0	0	0	0	0	0	0	0	1811	92.2	64.27	8.57	5.04	0.75	36.3	5.7	27.1	3.29953	40.6	NA	NA	NA	NA	0
95236	1	76	1	2	0	0.1	14.7	78	270.452	3.4	14.4	137	64	23.9	0	0	0	0	0	0	0	0	0	0	0	0	0	0	971	29.11	28.75	7	5.69	1.47	132	6.2	32.2	3.47197	0	NA	NA	NA	NA	0
95237	0	29	3	0	2	1.48	16.3	71	381.158	0.82	15.3	107	67	22.6	0	1	0	0	0	0	0	0	0	0	0	0	0	0	3886	143.31	171.22	22.34	4.58	1.86	65.6	5.5	28	3.3322	33.5	NA	NA	NA	NA	0
95238	0	78	4	1	1	4.4	10.7	71	916.75	3.88	13.6	150	78	27.4	1	0	0	1	0	1	NA	NA	NA	NA	NA	1	1	NA	781	32.93	46.28	6.08	6.03	1.4	117	4.9	62.1	4.12875	0	30	NA	NA	NA	2
95239	1	23	1	2	1	0.48	10.4	70	388.5	2.65	12.2	97	62	30.7	0	0	1	0	0	0	0	0	0	0	0	0	0	0	3384	133.15	154.26	18.1	5.02	1.11	211	6.4	26.1	3.26194	0	NA	NA	NA	NA	0
95242	1	58	4	1	2	1.22	15	71	312	2.21	13.1	160	82	28.1	0	0	0	1	0	0	0	0	0	0	0	0	0	0	2436	59.59	90.29	13.69	5.92	1.63	128	5.8	40.1	3.69138	0	NA	NA	NA	NA	0
95243	1	68	4	1	2	1.62	14.3	71	509.2	2.01	14.4	156	93	30.4	0	0	0	0	0	1	1	1	NA	NA	NA	NA	NA	NA	1911	70.81	74.58	11.89	4.73	1.33	235	5.4	28.2	3.33932	0	14	NA	NA	NA	0
95244	1	48	4	1	1	1.46	13.8	71	461.533	9.4	13.7	118	71	27.8	0	0	1	1	0	0	0	0	0	0	0	0	0	0	3027	94.4	192.07	12.91	4.11	1.06	106	7.4	42.7	3.7542	0	NA	NA	NA	NA	0
95247	1	64	5	2	2	0.88	6.3	77	276.5	13.1	12.2	125	61	36.1	1	0	1	1	0	0	0	0	0	0	0	0	0	0	2081	91.82	121.72	9.53	5.66	1.16	198	9.4	35	3.55535	0	NA	NA	NA	NA	2
95249	1	70	3	0	2	1.73	13.6	70	216.654	2.48	13.8	117	65	33.8	1	0	1	1	1	1	1	1	NA	NA	NA	NA	NA	NA	1911	70.81	74.58	11.89	4.89	1.19	176	6.2	41.9	3.73529	0	14	NA	NA	NA	1
95251	1	38	3	0	0	1.22	14.3	71	459.68	4.93	14.8	139	92	40.6	0	0	0	0	0	0	0	0	0	0	0	0	0	0	1482	76.51	49.21	9.91	5.46	0.85	76.9	5.5	29	3.3673	0	NA	NA	NA	NA	0
95252	0	70	3	0	2	1.58	13.4	75	1100.5	2.31	15.5	111	59	28.2	1	0	1	0	0	0	0	0	0	0	0	0	0	0	1119	27.63	64.53	3.77	3.7	1.01	172	5.6	34.5	3.54096	0	NA	NA	NA	NA	1
95255	1	24	3	0	1	5	8.2	66	1153.53	0.57	13.5	107	62	26.4	0	0	0	0	0	0	0	0	0	0	0	0	0	0	1911	70.81	74.58	11.89	3.26	1.73	53.7	5.4	22.9	3.13114	0	NA	NA	NA	NA	0
95256	1	66	3	0	1	0.79	9.7	63	589.154	1.93	14.5	127	72	26.5	1	0	0	0	1	0	0	0	0	0	0	0	0	0	1915	62.44	88.55	11.79	5.43	1.4	24.8	6	37.1	3.61362	0	NA	NA	NA	NA	1
95257	1	39	4	1	2	3.47	11.5	67	191.636	4.97	12.6	99	65	26.9	0	0	0	0	0	0	0	0	0	0	0	0	0	0	1129	30.81	41.42	5.66	5.69	1.68	37.9	5.7	31.4	3.44681	0	NA	NA	NA	NA	0
95258	0	62	2	2	2	1.74	20.1	68	1576.55	2.54	13	113	61	37.4	1	0	1	0	0	0	0	0	0	0	0	0	0	0	989	40.5	21.39	25.55	3.31	0.57	56.2	7.3	45.1	3.80888	0	NA	NA	NA	NA	2
95260	0	26	3	0	2	4.39	17.6	70	482.526	0.51	16.6	136	83	24.2	0	0	0	0	0	0	0	0	0	0	0	0	0	0	4084	179.4	112.88	41.52	3.83	1.24	144	5.4	28	3.3322	0	NA	NA	NA	NA	0
95261	1	24	2	2	1	1.22	26.7	68	696	8.47	14.4	107	64	47.7	0	0	0	0	0	0	0	0	0	0	0	0	0	0	1911	70.81	74.58	11.89	3.93	1.47	69.4	5.2	26.9	3.29213	0	NA	NA	NA	NA	0
95262	1	24	5	2	1	0.98	6.8	62	426.773	1.87	13.4	111	67	29.1	0	0	0	0	0	0	0	0	0	0	0	0	0	0	4070	76.93	245.63	15.44	3.83	1.63	33.3	5.4	39.8	3.68387	0	NA	NA	NA	NA	0
95265	1	46	1	2	2	1.37	15.4	74	885.176	1.23	15.1	125	91	28.7	0	0	1	1	0	0	0	0	0	0	0	0	0	0	1535	63.58	71.99	11.87	4.11	1.32	103	7.6	34.8	3.54962	0	NA	NA	NA	NA	0
95266	1	58	3	0	1	5	11.6	69	654.957	3.13	13.2	123	81	34.5	0	0	0	0	1	0	0	0	0	0	0	0	0	0	2342	114.64	118.46	16.59	5.59	1.66	125	5.3	30.9	3.43076	0	NA	NA	NA	NA	0
95268	0	70	3	0	0	2.04	12	71	396.667	2.61	14.6	122	72	30.2	0	0	0	0	0	0	0	0	0	0	0	0	0	0	2274	72.63	146.4	13.58	6.26	1.03	400	5.1	45	3.80666	0	NA	NA	NA	NA	0
95272	1	80	3	0	2	2.06	18.4	67	1348.2	0.72	13.5	141	77	19.9	0	0	0	0	0	0	0	0	0	0	0	0	0	0	1847	52.06	94.03	17.17	5.79	2.66	105	5.8	30.6	3.421	0	NA	NA	NA	NA	0
95273	0	62	1	2	2	1.22	17.2	70	438.182	6.87	15.3	135	87	30.9	1	1	0	0	0	0	0	0	0	0	0	0	0	0	2445	86.94	78.85	34.57	5.17	1.34	552	5.4	29.7	3.39115	14	NA	NA	NA	NA	1
95274	1	48	3	0	0	3.03	10.7	64	557.7	5.61	13	134	82	43.6	1	0	1	1	0	0	0	0	0	0	0	0	0	0	1676	35.21	38.58	8.77	3.49	1.01	28.9	6.3	33.2	3.50255	0	NA	NA	NA	NA	2
95275	1	41	5	2	2	5	8.2	64	408.778	1.17	13	103	69	21.4	0	0	0	0	0	0	0	0	0	0	0	0	0	0	1718	68.22	56.1	9.08	5.28	1.45	8.92	4.7	57.9	4.05872	0	NA	NA	NA	NA	0
95276	0	33	3	0	2	5	14.3	69	248.4	0.73	14.8	106	70	32.2	1	1	0	0	0	1	NA	NA	NA	NA	NA	NA	NA	NA	2242	51.58	59.41	11.9	4.14	1.42	275	5	26.3	3.26957	35.3	39	NA	NA	NA	2
95278	1	43	2	2	0	2.95	5	73	523.467	4.21	12.1	111	79	33.2	0	0	0	0	0	0	0	0	0	0	0	0	0	0	1390	40.92	56.85	5.22	4.65	0.98	12.7	6.5	49.7	3.906	0	NA	NA	NA	NA	0
95279	0	36	5	2	0	1.06	19.2	74	421.19	0.8	14.9	111	73	24	1	0	0	0	0	0	0	0	0	0	0	0	0	0	2197	61.91	56.9	12.38	5.66	1.06	122	5.5	31.3	3.44362	0	NA	NA	NA	NA	2
95281	1	61	4	1	2	3.48	15.9	73	373.676	2.52	8.3	134	37	33.4	0	0	1	1	0	0	0	0	0	0	0	0	0	0	1508	104.64	82.65	8.24	4.16	0.96	92.9	7.3	41.1	3.71601	0	NA	NA	NA	NA	0
95284	1	41	2	2	2	0.34	14.3	72	523.923	3.98	13	115	73	36.9	0	0	0	0	0	0	0	0	0	0	0	0	0	0	2248	91.22	115.25	11.41	4.81	1.09	44.8	5.3	29.7	3.39115	0	NA	NA	NA	NA	0
95287	1	56	5	2	2	5	16.7	79	138.462	0.53	10.8	132	87	20.8	0	0	0	0	0	0	0	0	0	0	0	0	0	0	1372	55.44	45.02	9.62	4.97	1.4	116	5.8	67.9	4.21804	0	NA	NA	NA	NA	0
95288	0	34	3	0	2	1.6	14.3	72	780	1.88	15	129	63	29.6	0	0	0	0	0	0	0	0	0	0	0	0	0	0	1893	38.91	90.54	11.11	4.55	1.76	217	5.1	26.8	3.2884	0	NA	NA	NA	NA	0
95289	1	56	1	2	2	3.95	5	71	1115.5	49.33	12.5	181	81	32.5	0	0	0	1	0	1	1	1	NA	NA	NA	NA	NA	NA	1423	54.76	62.1	5.07	4.99	1.66	86	5.6	36.9	3.60821	0	14	NA	NA	NA	0
95296	0	40	5	2	2	5	15	76	254.769	0.65	16.8	118	79	27.4	0	0	0	0	0	0	0	0	0	0	0	0	0	0	1725	86.96	71.68	16.43	5.69	1.11	154	5.2	30.9	3.43076	0	NA	NA	NA	NA	0
95302	1	45	1	2	0	2.79	17.9	69	637.111	2.45	13.4	117	62	29.3	0	0	0	1	0	0	0	0	0	0	0	0	0	0	1557	80.04	45.02	9.04	4.47	1.5	20.1	5.4	28.9	3.36384	0	NA	NA	NA	NA	0
95308	1	64	4	1	2	2.13	13.1	72	448.5	0.84	13.8	118	81	27.4	0	0	0	0	0	1	NA	NA	NA	NA	NA	NA	NA	NA	1862	56.85	74.32	7.23	5.92	1.09	344	6.2	36.1	3.58629	0	24	NA	NA	NA	0
95310	0	52	1	2	0	3.69	22	69	389.565	1.17	14.2	131	71	32.4	1	0	1	0	0	0	0	0	0	0	0	0	0	0	1911	70.81	74.58	11.89	5.95	1.24	81.8	6.4	27.7	3.32143	0	NA	NA	NA	NA	2
95312	0	25	5	2	2	5	14.1	68	274.105	4.27	15.3	117	69	29.2	0	0	0	0	0	0	0	0	0	0	0	0	0	0	1892	57.97	60.3	13.75	6.59	1.01	87.1	5.5	44.8	3.80221	0	NA	NA	NA	NA	0
95313	1	54	3	0	2	5	14.1	65	807.5	0.33	13	141	80	23.6	0	0	0	0	0	0	0	0	0	0	0	0	0	0	1134	49.72	40.82	14.75	4.34	1.89	12.8	5.3	27	3.29584	0	NA	NA	NA	NA	0
95315	1	63	5	2	2	2	17	65	552.273	4.42	13.4	121	71	45	1	0	0	0	0	0	0	0	0	0	0	0	0	0	1573	19.11	34.33	2.58	4.53	1.45	36.1	5	29.5	3.38439	0	NA	NA	NA	NA	2
95316	0	43	3	0	2	2.19	24.9	67	404.55	5.74	16	142	95	41.8	1	0	0	1	0	0	0	0	0	0	0	0	0	0	3905	115.18	178.33	16.84	4.97	0.85	200	5.3	31.2	3.44042	0	NA	NA	NA	NA	2
95318	1	60	3	0	1	5	15	70	844.444	2.12	15.2	127	86	35.9	0	0	0	0	0	1	1	1	NA	NA	NA	NA	NA	NA	1976	130.65	125.87	8.29	5.35	1.97	29.2	5.1	42.4	3.74715	0	14	NA	NA	NA	0
95319	1	55	1	2	0	1.36	10.6	72	577.059	1.36	12.9	136	65	29.4	0	0	0	0	0	0	0	0	0	0	0	0	0	0	2089	74.3	91.97	13.36	7.42	1.34	33.4	5.5	22.3	3.10459	0	NA	NA	NA	NA	0
95323	0	21	5	2	2	3.82	16.1	74	580.364	0.27	16.6	115	73	20.4	0	0	0	0	0	0	0	0	0	0	0	0	0	0	2835	134.19	133.42	15.6	3.78	1.29	88.9	5.1	107	4.67283	0	NA	NA	NA	NA	0
95325	0	68	2	2	0	0.98	17	81	296.97	2.39	15.4	114	61	26.5	0	1	1	0	0	0	0	0	0	0	0	0	0	0	4833	137.03	215.05	31.4	4.14	1.27	192	8.2	28.9	3.36384	22.3	NA	NA	NA	NA	0
95326	0	72	3	0	2	4.62	14.9	73	417.625	0.4	13.6	140	74	28.9	1	0	1	1	0	1	NA	NA	NA	NA	NA	NA	NA	NA	2490	87.3	91.35	19.01	3.26	0.67	238	7.4	43.9	3.78191	0	16	31	NA	NA	2
95329	0	47	5	2	2	1.99	15	76	306.526	0.93	15.8	117	75	24.5	0	0	0	0	0	0	0	0	0	0	0	0	0	0	2054	90.17	45.87	10.22	6.62	1.42	114	5.5	34.2	3.53223	0	NA	NA	NA	NA	0
95333	0	39	4	1	2	0.85	18.3	75	188.741	4.23	14.2	118	75	31	0	0	0	1	0	0	0	0	0	0	0	0	0	0	1911	70.81	74.58	11.89	5.53	1.06	305	5.6	55.3	4.01277	0	NA	NA	NA	NA	0
95338	0	72	2	2	0	0.09	12.2	72	223.2	1.93	12.9	127	77	26.7	1	0	1	0	0	0	0	0	0	0	0	0	0	0	1972	93.62	44.81	17.6	4.65	0.78	195	9.3	20.5	3.02042	0	NA	NA	NA	NA	2
95342	1	31	3	0	2	0.41	13.8	64	432	2.96	14.1	98	53	21.6	0	0	0	0	0	0	0	0	0	0	0	0	0	0	1932	56.57	45.17	5.63	3.47	1.78	16.7	5.4	36.5	3.59731	0	NA	NA	NA	NA	0
95346	1	61	4	1	2	1.4	10.4	71	323.077	1.11	12.7	114	67	30	0	0	0	1	0	1	1	NA	NA	NA	1	NA	NA	NA	1880	75.4	84.77	13.53	7.89	1.76	29.6	5.6	38.4	3.64806	0	38	NA	NA	NA	0
95348	1	39	2	2	2	2.65	11.1	78	271.208	6.43	13.8	129	81	33.3	0	0	0	0	0	0	0	0	0	0	0	0	0	0	1451	28.47	23.34	8.28	4.47	0.88	70.1	6.3	33.3	3.50556	0	NA	NA	NA	NA	0
95351	1	25	5	2	2	5	14	73	550.588	5.35	14.1	127	85	31.9	0	1	0	1	0	0	0	0	0	0	0	0	0	0	2245	108.56	71.22	14.58	5.51	1.11	294	5.3	40.4	3.69883	4.2	NA	NA	NA	NA	0
95352	1	50	3	0	0	1.41	20.6	74	490.286	0.68	13.1	103	63	22.3	1	0	0	0	0	0	0	0	0	0	0	0	0	0	1817	64	110.04	12.32	6.75	1.84	54.6	6.3	26.8	3.2884	0	NA	NA	NA	NA	2
95353	1	39	1	2	2	0.4	11.1	67	351	7.9	14.6	99	79	36.2	1	0	0	0	0	0	0	0	0	0	0	0	0	0	2212	70.8	143.08	9.89	2.82	1.03	64.7	6.4	23.8	3.16969	0	NA	NA	NA	NA	1
95357	1	56	4	1	1	0.67	12.4	73	141	3.18	13.2	126	67	36.1	1	0	0	1	0	0	0	0	0	0	0	0	0	0	818	43.83	49.51	4.07	4.84	1.4	52	5.2	35.8	3.57795	0	NA	NA	NA	NA	2
95358	1	70	5	2	0	0.84	9	74	1029	18.68	13.3	132	52	38.7	1	0	1	1	1	0	0	0	0	0	0	0	0	0	1176	59.77	36.84	5.6	4.42	0.78	132	11.5	44	3.78419	0	NA	NA	NA	NA	2
[truncated: 3,481 more rows]
